# Supplementary material for: JAK–STAT Signaling in Inflammatory Breast Cancer Enables Chemotherapy-Resistant Cell States
Source: Oxford University Press journal article supplement (doi:10.1158/0008-5472.can-22-0423), 2022-11-21
Supplement: can-22-0423_supplementary_table_s2_suppst2.xlsx [file can-22-0423_supplementary_table_s2_suppst2.xlsx]

## Sheet: Sheet1
Supplementary Table S2. List of tumor samples.
Case No	age	histology	Stage	grade	ER	PR	HER2	lymph node	treatment
1	39			modified Bloom-Richardson grade III/III	pos-low	neg	neg	pos	pre
2	48			modified Bloom-Richardson grade III/III	neg	neg	neg	pos	pre
3	34			modified Bloom-Richardson grade III/III	pos	pos-low	neg	pos	pre
4	72			modified Bloom-Richardson grade III/III	neg	neg	neg	pos	pre
5	47			modified Bloom-Richardson grade III/III	pos	neg	neg	pos	pre
6	53			grade 3/3	neg	neg	neg	pos	pre
7	45	IDC		3	neg	neg	neg		yes
8	65	IDC		2	pos	pos	neg		yes
9	53	IDC		3	pos	pos	pos		yes
10	47	IDC		3	pos	pos	neg		yes
11	48	IDC		3	pos	pos	neg		yes
12	58	IDC		2	pos	pos	neg		yes
13	34	IDC		3	pos	pos	neg		yes
14	61	IDC		1	pos	neg	neg		yes
15	73	IDC		3	neg	neg	neg		yes
16	58	ductal/lobular		3	pos	pos	neg		yes
17	35	ductal/lobular		2	pos	neg	neg		yes
18	52	IDC		3	pos	neg	pos		yes
19	47	IDC		2	pos	pos	pos		yes
20	53.8466	IDC	cT4dN0	modified Bloom-Richardson grade III/III	pos	neg	pos	neg	PST
21	48.4384	Mucinous carcinoma	cT4dN3M1/Rt ALN, Sternum, Lt SCN	modified Bloom-Richardson grade II/III	pos	pos	neg	pos	PST
22	42.2795	IDC	cT4dN2M0	modified Bloom-Richardson grade III/III	pos	neg	pos	pos	PST
23	47.1068	IDC	cT4dN3-SCN	modified Bloom-Richardson grade III/III	neg	neg	pos	pos	PST
24	75.263	IDC	cT4dN0M0	modified Bloom-Richardson grade II/III	pos	pos	neg	pos	PST
25	61.0027	IDC	cT4dN2	modified Bloom-Richardson grade III/III	neg	neg	pos	pos	F/U loss
26	28.2521	IDC	cT4dN1	modified Bloom-Richardson grade II/III	pos	pos	neg	pos	PST
27	54.1699	IDC	cT4dN2	modified Bloom-Richardson grade II/III	pos	pos	neg	pos	PST
28	58.1671	IDC	cT4dN3-SCN	modified Bloom-Richardson grade III/III	neg	neg	pos	pos	PST
29	39.1014	IDC	cT4dN1	modified Bloom-Richardson grade III/III	neg	neg	neg	pos	PST
30	55.9863	IDC	cT4dN2	modified Bloom-Richardson grade II/III	neg	neg	pos	pos	PST
31	44.5014	IDC	cT4dN1	modified Bloom-Richardson grade III/III	pos	pos	pos	pos	PST
32	54.126	IDC	cT4dN2	modified Bloom-Richardson grade II/III	pos	pos	pos	pos	PST
33	59.9425	IDC	cT4dN2	modified Bloom-Richardson grade II/III	neg	neg	pos	pos	PST
