# Supplementary material for: JAK–STAT Signaling in Inflammatory Breast Cancer Enables Chemotherapy-Resistant Cell States
Source: Oxford University Press journal article supplement (doi:10.1158/0008-5472.can-22-0423), 2022-11-21
Supplement: can-22-0423_supplementary_table_s5_suppst5.xlsx [file can-22-0423_supplementary_table_s5_suppst5.xlsx]

## Sheet: Sheet1
Supplementary Table S5. List of genes used in gene signatures
Hallmark_EMT Signature used in Fig. 2F	Hollem_Myoepithelial Breat Tumor used in Fig. 2G	Hallmark_JAK_STAT Siganture Used in Supplemental Fig. S3A	KEGG_JAK_STAT Signature Used in Fig. 4E-F and Supplementary Fig. SJ-K	PDE_Signature Used in Fig. 4E and Supplementary Fig. SJ	IBC_STAT3_Signature Supplementary Fig. S8G
ABI3BP	AARS	A2M	AKT1	PDE1A	MGP
ACTA2	AASDHPPT	ACVR1B	AKT2	PDE1B	ABCD2
ADAM12	AATF	ACVRL1	AKT3	PDE2A	CD180
ANPEP	ABCB6	BAK1	BCL2L1	PDE3A	SULF1
APLP1	ABCC1	CBL	CBL	PDE3B	STOM
AREG	ABCC5	CCL7	CBLB	PDE4A	CRISPLD2
BASP1	ABCG1	CCR1	CBLC	PDE4B	SLC1A3
BDNF	ABL2	CD14	CCND1	PDE4C	TENM2
BGN	ACAS2	CD36	CCND2	PDE4D	MME
BMP1	ACTG2	CD38	CCND3	PDE7A	LOX
CADM1	ACVR1	CD44	CISH	PDE8A	SLC16A11
CALD1	ADAMTS1	CD9	CLCF1	PDE8B	ELOVL3
CALU	ADAMTS15	CNTFR	CNTF		XKRX
CAP2	ADAMTS3	CRLF2	CNTFR		PTGS1
CAPG	ADAMTS5	CSF1	CREBBP		CALHM3
CCN1	ADARB1	CSF2	CRLF2		GPNMB
CCN2	ADORA2B	CSF2RA	CSF2		CFI
CD44	ADRB2	CSF2RB	CSF2RA		PPARGC1A
CD59	AEBP1	CSF3R	CSF2RB		ADAMTS3
CDH11	AFG3L2	CXCL1	CSF3		WNT6
CDH2	AGR2	CXCL10	CSF3R		BGN
CDH6	AGTRAP	CXCL11	CSH1		WNT11
COL11A1	AHI1	CXCL13	CTF1		MRAP2
COL12A1	AHSA2	CXCL3	EP300		FIBIN
COL16A1	AKAP1	CXCL9	EPO		GLI1
COL1A1	AKR1C2	DNTT	EPOR		NXNL2
COL1A2	AKR1C3	EBI3	GH1		UGT1A6
COL3A1	ALDH3A2	FAS	GH2		OPRK1
COL4A1	ALS2CR19	GRB2	GHR		ATP2B2
COL4A2	ALS2CR4	HAX1	GRB2		SMAD6
COL5A1	AMMECR1	HMOX1	IFNA1		GLP2R
COL5A2	ANGPT1	IFNAR1	IFNA10		SEMA3C
COL5A3	ANKH	IFNGR1	IFNA13		SAMD11
COL6A2	ANKRD10	IFNGR2	IFNA14		NPY4R
COL6A3	ANKRD11	IL10RB	IFNA16		BZRAP1
COL7A1	ANKRD17	IL12RB1	IFNA17		CYP4B1
COL8A2	ANLN	IL13RA1	IFNA2		RAMP1
COLGALT1	ANTXR1	IL15RA	IFNA21		SUSD2
COMP	ANXA5	IL17RA	IFNA4		DUSP27
COPA	APG9L1	IL17RB	IFNA5		ADORA1
CRLF1	ARHGEF4	IL18R1	IFNA6		PDE7B
CTHRC1	ARID5B	IL1B	IFNA7		WDR86
CXCL1	ARMCX1	IL1R1	IFNA8		WISP2
CXCL12	ASAH3L	IL1R2	IFNAR1		SLC29A4
CXCL6	ASNS	IL2RA	IFNAR2		IQGAP2
CXCL8	ASPM	IL2RG	IFNB1		FAM211B
DAB2	ASS	IL3RA	IFNE		SLC16A12
DCN	ASXL2	IL4R	IFNG		PALM3
DKK1	ATF4	IL6	IFNGR1		SULT1E1
DPYSL3	ATP1A1	IL6ST	IFNGR2		FBN2
DST	ATP1B3	IL7	IFNK		RHOBTB3
ECM1	ATP2A2	IL9R	IFNL1		PON3
ECM2	ATP2B1	INHBE	IFNL2		MAPK10
EDIL3	ATP8B2	IRF1	IFNL3		SYT12
EFEMP2	ATRN	IRF9	IFNLR1		ETNK2
ELN	BARD1	ITGA4	IFNW1		C1QL1
EMP3	BCGF1	ITGB3	IL10		AS3MT
ENO2	BCL11A	JUN	IL10RA		TMEM61
FAP	BCL2L10	LEPR	IL10RB		LSP1
FAS	BCL5	LTB	IL11		SPOCK2
FBLN1	BDKRB2	LTBR	IL11RA		NGFR
FBLN2	BEX2	MAP3K8	IL12A		MAP2
FBLN5	BICC1	MYD88	IL12B		USH2A
FBN1	BICD2	OSMR	IL12RB1		TPRG1
FBN2	BIRC5	PDGFC	IL12RB2		F2R
FERMT2	BIVM	PF4	IL13		SLC45A1
FGF2	BLCAP	PIK3R5	IL13RA1		CLEC7A
FLNA	BRCA1	PIM1	IL13RA2		MAOB
FMOD	BRD2	PLA2G2A	IL15		MSS51
FN1	BST2	PTPN1	IL15RA		TLL1
FOXC2	BTBD3	PTPN11	IL19		HLX
FSTL1	BUB1	PTPN2	IL2		WDR65
FSTL3	BUB3	REG1A	IL20		STAC2
FUCA1	BVES	SOCS1	IL20RA		ANK1
FZD8	BZW2	SOCS3	IL20RB		FAM13C
GADD45A	C10orf3	STAM2	IL21		DUSP2
GADD45B	C10orf48	STAT1	IL21R		SPTLC3
GAS1	C10orf56	STAT2	IL22		CD302
GEM	C11orf32	STAT3	IL22RA1		GAL3ST1
GJA1	C13orf10	TGFB1	IL22RA2		TSHZ2
GLIPR1	C13orf18	TLR2	IL23A		DLX4
GPC1	C13orf21	TNF	IL23R		TNFAIP8L3
GPX7	C14orf106	TNFRSF12A	IL24		LRRIQ1
GREM1	C14orf138	TNFRSF1A	IL26		FBLN1
HTRA1	C15orf25	TNFRSF1B	IL2RA		ANKS1B
ID2	C16orf5	TNFRSF21	IL2RB		IL22RA2
IGFBP2	C1orf24	TYK2	IL2RG		APLN
IGFBP3	C20orf111		IL3		ZC3H12D
IGFBP4	C20orf12		IL3RA		KCNK2
IL15	C20orf129		IL4		GPRIN3
IL32	C20orf17		IL4R		CASP14
IL6	C20orf82		IL5		RERG
INHBA	C21orf45		IL5RA		CIITA
ITGA2	C21orf91		IL6		EFEMP1
ITGA5	C21orf96		IL6R		CXCR4
ITGAV	C22orf18		IL6ST		EDN2
ITGB1	C2orf18		IL7		PTGFR
ITGB3	C6orf151		IL7R		SKIDA1
ITGB5	C7orf3		IL9		SDIM1
JUN	C9orf78		IL9R		GUCY1A2
LAMA1	CA12		IRF9		ZNF488
LAMA2	CABC1		JAK1		BEST2
LAMA3	CAPN3		JAK2		EVPLL
LAMC1	CAPN5		JAK3		KCNJ2
LAMC2	CAPNS2		LEP		METTL7A
LGALS1	CARS		LEPR		PGC
LOX	CAV1		LIF		ANGPT1
LOXL1	CBR1		LIFR		ZBTB16
LOXL2	CCDC3		MPL		SIM1
LRP1	CCDC8		MYC		GALNT16
LRRC15	CCM1		OSM		IFI44L
LUM	CCNB1		OSMR		FXYD6
MAGEE1	CCNB2		PIAS1		ADAMTS15
MATN2	CCND2		PIAS2		OAS3
MATN3	CCNF		PIAS3		SOCS3
MCM7	CD109		PIAS4		TRIM17
MEST	CD164L1		PIK3CA		FOS
MFAP5	CD1D		PIK3CB		IFIT1
MGP	CDC16		PIK3CD		CFD
MMP1	CDC2		PIK3CG		RUNX2
MMP14	CDC25B		PIK3R1		CLDN11
MMP2	CDC25C		PIK3R2		IFI6
MMP3	CDC26		PIK3R3		IFITM1
MSX1	CDC2L5		PIK3R5		OAS1
MXRA5	CDC42EP4		PIM1		SP110
MYL9	CDC45L		PRL		OAS2
MYLK	CDC6		PRLR		XAF1
NID2	CDC7		PTPN11		COL8A1
NNMT	CDCA5		PTPN6		KIF7
NOTCH2	CDCA7		SOCS1		IVL
NT5E	CDH13		SOCS2		CMPK2
NTM	CDO1		SOCS3		IFI27
OXTR	CEBPA		SOCS4		CADM2
P3H1	CENPH		SOCS5		SERPINA3
PCOLCE	CFHL1		SOCS7		REC8
PCOLCE2	CHC1		SOS1		MX1
PDGFRB	CHC1L		SOS2		TGFBI
PDLIM4	CHCHD2		SPRED1		IFI44
PFN2	CHES1		SPRED2		TMEM220
PLAUR	CHN1		SPRY1		TRIM22
PLOD1	CHRM3		SPRY2		MDK
PLOD2	CHSY1		SPRY3		CCNI2
PLOD3	CIRBP		SPRY4		DDX60
PMEPA1	CITED2		STAM		ARAP3
PMP22	CKAP2		STAM2		IRF7
POSTN	CKLFSF6		STAT1		PARP9
PPIB	CLCA2		STAT2		COL8A2
PRRX1	CLCA4		STAT3		SAMD9
PRSS2	CLDN11		STAT4		GPX7
PTHLH	CLECSF2		STAT5A		IRF9
PTX3	CMKOR1		STAT5B		IFIT2
PVR	CNN1		STAT6		KLK14
QSOX1	COG7		TPO		C1orf186
RGS4	COL11A1		TSLP		MMP7
RHOB	COL12A1		TYK2		LAMP3
SAT1	COL15A1				SOX7
SCG2	COL17A1				RSAD2
SDC1	COL1A1				CCL5
SDC4	COL1A2				IFIT3
SERPINE1	COL27A1				FOXQ1
SERPINE2	COL3A1				TERT
SERPINH1	COL4A6
SFRP1	COL5A2
SFRP4	COL6A1
SGCB	COL6A3
SGCD	COL8A2
SGCG	COL9A3
SLC6A8	COPZ2
SLIT2	CPNE8
SLIT3	CPSF4
SNAI2	CPT1A
SNTB1	CREB5
SPARC	CRI2
SPOCK1	CRKL
SPP1	CROT
TAGLN	CRSP8
TFPI2	CSNK1G1
TGFB1	CSRP2
TGFBI	CTHRC1
TGFBR3	CTNNAL1
TGM2	CTSB
THBS1	CTSC
THBS2	CTSD
THY1	CUTC
TIMP1	CXCL1
TIMP3	CXCL14
TNC	CXCL6
TNFAIP3	CYBASC3
TNFRSF11B	CYP1A1
TNFRSF12A	CYP1B1
TPM1	CYP2R1
TPM2	DBC1
TPM4	DBR1
VCAM1	DCN
VCAN	DDHD1
VEGFA	DDIT3
VEGFC	DDIT4
VIM	DDX28
WIPF1	DDX39
WNT5A	DEGS1
	DEPDC1B
	DEPDC6
	DHX57
	DIO2
	DKK3
	DLG7
	DLL1
	DMN
	DNAJC12
	DNAL4
	DNASE2
	DNCH2
	DOCK4
	DPH1
	DPYD
	DSC3
	DSG3
	DSIPI
	DST
	DUSP11
	DUSP2
	DUSP6
	DUSP7
	DUT
	DVL3
	E2F2
	EBF
	EFTUD1
	EGFL9
	EGFR
	EIF3S8
	EIF4EBP3
	ELOVL4
	ELTD1
	EMP2
	EPAS1
	ERCC5
	ERF
	ESM1
	ETS2
	ETV1
	ETV1
	EXT1
	EXTL2
	F2R
	FABP4
	FABP5
	FADS1
	FADS2
	FAT
	FBN2
	FBXO30
	FBXO32
	FDPS
	FEZ1
	FGF1
	FGF11
	FGF2
	FGFR2
	FIGF
	FKBP10
	FLOT2
	FLRT2
	FMO4
	FOXL1
	FOXP1
	FST
	FUS
	FZD3
	FZD6
	GALNT3
	GBP6
	GDAP1
	GDPD1
	GEM
	GEMIN4
	GGH
	GJA1
	GJB6
	GK
	GLA
	GLE1L
	GLI3
	GMNN
	GMPS
	GNAL
	GNG11
	GOPC
	GOT1
	GPC1
	GPC4
	GPC6
	GPM6B
	GPNMB
	GPR116
	GPT2
	GPX2
	GREM1
	GSTA4
	GSTM4
	GTF2H2
	GYPC
	H19
	H1FX
	HAS3
	HBE1
	HBEGF
	HELLS
	HERPUD1
	HEY1
	HGFAC
	HIST1H1C
	HIST1H4C
	HIST1H4H
	HMGB2
	HMGCR
	HMGCS1
	HNMT
	HNRPM
	HOXC13
	HR
	HRB2
	HRMT1L6
	HSPA4L
	HSPA9B
	HSPBAP1
	HTR3A
	HTR7
	ID4
	IDH3B
	IFI16
	IFITM1
	IGFBP2
	IKBKAP
	IL13RA2
	IL1B
	IL1R1
	IL6R
	ILKAP
	IMPA2
	IRF6
	IRX2
	IRX4
	ITGA6
	ITGB3BP
	ITM2A
	ITPKB
	ITPR1
	JAG1
	JAG2
	JAM3
	JUB
	KBTBD6
	KBTBD7
	KBTBD9
	KCTD1
	KCTD15
	KIAA0685
	KIAA1411
	KIAA2010
	KIF11
	KIF1A
	KIF2
	KIF20A
	KIF22
	KIF2C
	KIRREL
	KLF7
	KLHL21
	KLK13
	KNSL7
	KNTC2
	KRT10
	KRT17
	KRTAP19-1
	KRTAP3-2
	KYNU
	LAMA1
	LAMB3
	LAT
	LCP1
	LGALS7
	LHFP
	LMNA
	LPHN1
	LPXN
	LRIG3
	LTF
	LUM
	LY64
	LY6K
	M6PR
	MAB21L1
	MAF
	MAGEF1
	MAGEH1
	MAML1
	MAOB
	MAP3K12
	MAP3K5
	MARK1
	MAST1
	MBD4
	MBNL2
	MBTD1
	MBTPS1
	MCAM
	MCM10
	MCM3
	MCM5
	MCM6
	MCM7
	MCM8
	MCOLN3
	MED18
	METTL4
	MFN2
	MGA
	MGEA5
	MGP
	MID1
	MIF
	MITF
	MKKS
	MME
	MMP1
	MMP10
	MMP16
	MMP28
	MMP3
	MR1
	MRC2
	MRPS18B
	MRPS6
	MSRB3
	MT1G
	MT1K
	MTHFD2
	MUC5B
	MVK
	MYH11
	MYLIP
	MYLK
	MYO5A
	MYOZ2
	NAP1L2
	NAPB
	NASP
	NAV1
	NBEA
	NCALD
	NCOA2
	NCOA7
	NDE1
	NDN
	NDRG1
	NDUFC1
	NEDD4L
	NEF3
	NEFL
	NEK2
	NEK9
	NFE2L2
	NFIB
	NFIL3
	NHS
	NMU
	NNMT
	NOTCH1
	NPHP3
	NPR3
	NQO2
	NR0B1
	NR1D2
	NR4A2
	NRG1
	NUDT11
	NUSAP1
	ODC1
	ODZ2
	OLFM4
	ORC1L
	ORC6L
	OSTM1
	OTUD1
	P2RY5
	PABPN1
	PAK3
	PAMCI
	PAPD1
	PAPSS1
	PARD3
	PARD6G
	PAXIP1L
	PC
	PCBP2
	PCDH17
	PCDH21
	PCDH7
	PCDHGA1
	PCK2
	PDCD4
	PDE7A
	PDZRN3
	PEG3
	PELO
	PGF
	PHCA
	PHGDH
	PI3
	PIGW
	PIK3R1
	PILRA
	PKD2
	PLA2G4A
	PLAC9
	PLEKHM2
	PLRG1
	PLSCR4
	PMP22
	PMVK
	POLA
	POLE2
	POLE4
	POLH
	POLS
	POSTN
	PPAP2A
	PPAP2B
	PPARA
	PPARGC1A
	PPFIBP1
	PPFIBP2
	PPM1D
	PPM1E
	PPP1R12A
	PPP1R12B
	PPP1R14A
	PPP2R2B
	PPT1
	PPT2
	PRC1
	PREP
	PRKCA
	PRKD1
	PRKDC
	PRKRIP1
	PRR4
	PRSS11
	PSAT1
	PSIP1
	PSMD5
	PTGFRN
	PTGS1
	PTHLH
	PTPN13
	PTPRG
	PTPRZ1
	PTTG1
	PTTG3
	PUM1
	PVRL3
	PYGB
	QKI
	R3HDM
	RAB36
	RAB38
	RAB39B
	RAB7L1
	RAD50
	RAD51AP1
	RAD52
	RAE1
	RAN
	RASIP1
	RASSF6
	RBBP4
	RBBP6
	RBBP8
	RBL1
	RBM19
	RERG
	RFC2
	RGMB
	RIOK3
	RIPK4
	RNASE7
	RNF4
	RNH
	RNMTL1
	RNU47
	ROBO1
	RPL27A
	RPRM
	RPS6KA5
	RRM1
	RRM2
	RTTN
	S100A12
	S100A14
	S100A2
	S100A4
	S100A7
	S100A8
	S100A9
	SAFB
	SAP30
	SARS
	SBSN
	SC4MOL
	SCARB1
	SCD
	SCGF
	SCN1B
	SCPEP1
	SDC1
	SDC2
	SDPR
	SEC15L2
	SEC24D
	SEMA5A
	SEMA6A
	SENP3
	SERPINB13
	SERPINB3
	SERPINB8
	SERPING1
	SERPINH1
	SERPINI1
	SESN2
	SESN3
	SFMBT1
	SFRP2
	SFRS1
	SFRS10
	SGCE
	SGNE1
	SH3BGR
	SH3MD1
	SHC4
	SHCBP1
	SHMT2
	SIL
	SIPA1L1
	SLC11A1
	SLC16A1
	SLC1A4
	SLC1A5
	SLC20A1
	SLC25A20
	SLC27A3
	SLC2A9
	SLC30A1
	SLC35D1
	SLC35E4
	SLC36A4
	SLC38A1
	SLC38A2
	SLC39A6
	SLC3A2
	SLC7A11
	SLC7A5
	SLIT1
	SLITRK6
	SMC2L1
	SNCA
	SNX15
	SNX7
	SORBS1
	SOSTDC1
	SOX12
	SOX9
	SPARC
	SPARCL1
	SPHK1
	SPINK5
	SPIRE1
	SPOCK
	SPON1
	SPOP
	SPP1
	SPRED2
	SPRR1A
	SPRY2
	SQSTM1
	SRPX
	SSA2
	SSBP2
	SSRP1
	ST5
	ST7L
	STAG1
	STARD7
	STAT3
	STC2
	STIM2
	STK6
	STOM
	SULF1
	SVIL
	SYNPO2
	TACC2
	TACC3
	TAF4B
	TBC1D2
	TBC1D4
	TBCC
	TBX3
	TCF4
	TCF7L2
	TEAD4
	TEX10
	TFAP2B
	TFRC
	TGFB1
	TGFB1I4
	TH1L
	THOC3
	THY1
	TIMP1
	TIMP3
	TLE4
	TM4SF10
	TM4SF2
	TMEM16A
	TMEM22
	TMPO
	TNFAIP6
	TNNI2
	TNRC6C
	TOP2A
	TOP3A
	TP53INP1
	TP73L
	TPM2
	TPX2
	TRAF5
	TRAM2
	TRIB3
	TRIM25
	TRIM29
	TRIP13
	TRPV6
	TTC11
	U2AF1
	UBAP2L
	UBE2C
	UBOX5
	UCHL1
	UCN2
	UGT8
	UNC5B
	UNC5D
	UNQ467
	UPF3B
	USP28
	USP31
	UST
	VAV3
	VIM
	VPS13A
	VSNL1
	WAC
	WARS
	WDFY2
	WDR37
	WDR4
	WISP1
	WWOX
	XIST
	XPOT
	ZBTB5
	ZCCHC2
	ZHX2
	ZNF136
	ZNF22
	ZNF281
	ZNF295
	ZNF297B
	ZNF346
	ZNF385
	ZNF395
	ZNF425
	ZNF436
	ZNF503
	ZNF537
	ZNF598
	ZNF605
	ZNRF2
	ZWINT
	ZZZ3
