# Supplementary material for: JAK–STAT Signaling in Inflammatory Breast Cancer Enables Chemotherapy-Resistant Cell States
Source: Oxford University Press journal article supplement (doi:10.1158/0008-5472.can-22-0423), 2022-11-21
Supplement: can-22-0423_supplementary_table_s8_suppst8.xlsx [file can-22-0423_supplementary_table_s8_suppst8.xlsx]

## Sheet: FCIBC02 clusters
Supplementary Table S8. List of genes differentially expressed among clusters in scRNA-seq data.
CLUSTER 0							CLUSTER 1							CLUSTER 2							CLUSTER 3							CLUSTER 4							CLUSTER 5
gene	p_val	avg_logFC	pct.1	pct.2	p_val_adj		gene	p_val	avg_logFC	pct.1	pct.2	p_val_adj		gene	p_val	avg_logFC	pct.1	pct.2	p_val_adj		gene	p_val	avg_logFC	pct.1	pct.2	p_val_adj		gene	p_val	avg_logFC	pct.1	pct.2	p_val_adj		gene	p_val	avg_logFC	pct.1	pct.2	p_val_adj
HMGB2	2.84905e-174	-1.29915	0.504	0.924	3.97842e-170		HIST1H4C	6.21011e-130	1.17415	0.991	0.85	8.67179e-126		MT-CO2	1.59927e-124	0.484627	1	0.997	2.23322e-120		CDC20	2.03709e-172	1.78356	1	0.782	2.84459e-168		MT-CO2	1.62402e-44	-0.921931	0.977	0.998	2.26778e-40		C1GALT1C1	4.66993e-11	0.892083	0.692	0.14	6.5211e-07
MKI67	1.93688e-147	-0.979941	0.219	0.812	2.70466e-143		KIAA0101	2.62428e-127	0.786335	0.983	0.698	3.66454e-123		PRDX1	8.45171e-119	-0.703968	1	1	1.1802e-114		CCNB1	3.82327e-167	0.968596	0.862	0.203	5.33881e-163		MT-ND4	8.73287e-43	-0.798898	0.989	0.998	1.21946e-38		RPS20	5.15398e-10	-1.72885	0.923	1	7.19701e-06
KIAA0101	1.0103e-140	-1.00342	0.496	0.9	1.41079e-136		ASF1B	2.1651e-122	0.620601	0.954	0.541	3.02335e-118		MGST3	5.28344e-107	-0.61252	0.992	0.998	7.37779e-103		PTTG1	7.50719e-161	1.21489	1	0.639	1.0483e-156		HMGB1	8.51263e-40	-0.904205	0.966	1	1.1887e-35		MT-CYB	5.48364e-10	1.06034	1	0.995	7.65735e-06
CENPF	1.89098e-135	-1.1237	0.333	0.856	2.64057e-131		ATAD2	1.69434e-120	0.638039	0.969	0.598	2.36598e-116		RPLP1	1.50302e-103	0.277942	1	1	2.09881e-99		CCNB2	1.36108e-147	0.929071	0.912	0.314	1.90062e-143		ANXA1	1.31812e-31	1.13073	1	0.954	1.84063e-27		MT-CO1	5.48365e-10	1.09692	1	0.997	7.65737e-06
UBE2C	2.09671e-133	-1.23679	0.476	0.893	2.92785e-129		FEN1	3.86419e-109	0.570526	0.908	0.537	5.39596e-105		ENO1	1.26938e-100	-0.688847	0.997	0.998	1.77256e-96		CDKN3	3.05434e-143	1.03561	0.991	0.695	4.26509e-139		EIF1	1.95965e-30	0.625568	0.989	0.999	2.73645e-26		RPS14	5.48365e-10	-1.54333	1	1	7.65737e-06
SMC4	6.97694e-131	-0.757416	0.406	0.881	9.7426e-127		CLSPN	3.92388e-105	0.515609	0.84	0.38	5.4793e-101		PPIA	2.84752e-96	-0.391936	1	1	3.97627e-92		UBE2S	4.7745e-129	1.00437	1	0.962	6.66711e-125		MT-CYB	3.20334e-30	-0.603909	0.931	0.998	4.47314e-26		MT-ND2	5.51772e-10	1.25472	1	0.995	7.70494e-06
H2AFZ	1.5948e-128	-0.574116	0.998	0.998	2.22698e-124		HIST1H1A	1.23973e-103	0.511226	0.591	0.145	1.73116e-99		MT-ND4	6.39406e-96	0.315487	1	0.997	8.92866e-92		CENPF	2.53575e-124	1.21495	0.985	0.637	3.54092e-120		MT-CO1	8.21994e-30	-0.651733	0.989	0.998	1.14783e-25		MT-ND3	5.53473e-10	1.29462	1	0.99	7.7287e-06
RRM2	4.67837e-120	-0.649615	0.156	0.737	6.53288e-116		RRM2	7.85879e-101	0.563783	0.882	0.438	1.0974e-96		RPS27	1.2088e-92	0.262772	1	0.999	1.68797e-88		PLK1	8.23013e-123	0.752156	0.762	0.206	1.14926e-118		MT-CO3	5.32769e-29	-0.643038	0.943	0.998	7.43959e-25		RPLP2	5.63864e-10	-1.19347	1	1	7.87379e-06
CKS2	9.26727e-118	-0.975877	0.872	0.98	1.29408e-113		RNASEH2A	4.38296e-99	0.53174	0.989	0.885	6.12036e-95		RPS28	2.37553e-90	0.279868	1	1	3.3172e-86		HMGB1	1.04229e-116	0.506522	1	0.998	1.45545e-112		NUCKS1	6.59362e-28	-0.7169	0.943	0.998	9.20733e-24		MT-CO3	5.79788e-10	1.30767	1	0.995	8.09616e-06
ASF1B	3.16426e-117	-0.634697	0.27	0.823	4.41857e-113		HIST1H1D	3.16674e-84	0.375081	0.477	0.102	4.42204e-80		RPS12	1.58353e-84	0.283016	1	0.999	2.21124e-80		BIRC5	1.25984e-112	0.720116	0.918	0.437	1.75924e-108		PTMA	6.87914e-28	-0.541032	1	1	9.60603e-24		MT-ND1	5.88825e-10	1.10203	1	0.995	8.22235e-06
CKS1B	2.1076e-112	-0.655328	0.935	0.985	2.94306e-108		DUT	7.05878e-84	0.484791	0.991	0.875	9.85688e-80		UBB	4.45981e-84	-0.552425	1	0.999	6.22768e-80		NUCKS1	5.14376e-111	0.626312	1	0.995	7.18275e-107		SERF2	1.62118e-27	-0.48469	1	1	2.26381e-23		RPL39	6.09192e-10	-1.63263	1	0.999	8.50676e-06
NUF2	1.12384e-109	-0.65477	0.1	0.657	1.56934e-105		PCNA	5.3475e-78	0.501572	0.867	0.56	7.46724e-74		NPM1	1.24065e-80	-0.49625	1	0.999	1.73245e-76		DLGAP5	1.01973e-107	0.520305	0.683	0.159	1.42395e-103		HMGN2	2.23569e-27	-0.729689	0.954	0.99	3.12191e-23		RPL31	6.22509e-10	-1.55745	0.846	1	8.69271e-06
NUSAP1	5.08591e-107	-0.682834	0.163	0.692	7.10196e-103		E2F1	4.33793e-75	0.433544	0.829	0.429	6.05748e-71		ILF2	1.27987e-80	-0.581563	0.987	0.982	1.78722e-76		CENPE	1.10105e-107	0.581858	0.669	0.159	1.53751e-103		TMSB10	2.35136e-27	-0.511201	1	0.999	3.28344e-23		RPS19	6.28302e-10	-1.20637	1	1	8.77361e-06
TPX2	3.70253e-105	-0.640522	0.124	0.662	5.17022e-101		H2AFZ	4.03092e-73	0.374157	1	0.997	5.62878e-69		EIF4A1	2.08994e-80	-0.652617	0.985	0.989	2.91839e-76		NUF2	1.97995e-106	0.80868	0.889	0.403	2.7648e-102		MYBL2	4.01192e-27	-0.740561	0.126	0.754	5.60224e-23		MT-ND4	6.34148e-10	0.997972	1	0.998	8.85525e-06
CDC20	7.55424e-98	-1.18975	0.594	0.919	1.05487e-93		UBE2T	1.59857e-71	0.446498	0.952	0.756	2.23224e-67		SKP1	3.21181e-79	-0.518775	0.99	0.989	4.48497e-75		CDCA3	5.43688e-101	0.657742	0.801	0.286	7.59205e-97		DBI	4.2332e-27	-0.533684	0.989	0.997	5.91124e-23		RPL35	6.34148e-10	-1.41424	0.923	1	8.85525e-06
TYMS	6.77384e-90	-0.497878	0.305	0.772	9.45899e-86		RMI2	4.26052e-71	0.342696	0.696	0.306	5.9494e-67		PSMB5	2.40371e-78	-0.474943	0.974	0.992	3.35654e-74		DYNLL1	1.89496e-98	0.479399	1	0.994	2.64612e-94		IDH2	6.16383e-27	-0.666939	0.655	0.945	8.60717e-23		RPS15A	6.4401e-10	-1.35322	0.923	0.999	8.99296e-06
SGOL1	5.98989e-88	-0.394474	0.066	0.563	8.36428e-84		HIST2H2AC	1.38891e-67	0.458643	0.648	0.3	1.93947e-63		MYL6	1.62072e-77	-0.40526	1	0.999	2.26317e-73		STMN1	1.45897e-97	0.631475	1	0.998	2.03731e-93		GSTP1	6.22443e-27	-0.370062	1	1	8.6918e-23		RPS29	6.75543e-10	-1.43616	0.923	0.999	9.43328e-06
TOP2A	6.63481e-86	-0.559589	0.083	0.558	9.26485e-82		HELLS	5.48913e-67	0.378845	0.792	0.436	7.66503e-63		PSMB3	3.01621e-77	-0.469237	0.992	0.996	4.21184e-73		HMMR	3.59203e-89	0.660513	0.748	0.28	5.01591e-85		H2AFV	5.44543e-26	-0.610921	0.92	0.98	7.604e-22		RPL18A	6.8921e-10	-1.37113	1	1	9.62412e-06
MYBL2	2.34196e-85	-0.516425	0.458	0.844	3.27031e-81		RPA3	1.11983e-65	0.415355	0.971	0.864	1.56372e-61		PRDX2	4.23426e-77	-0.367609	1	1	5.91272e-73		ANP32E	8.39232e-88	0.629068	0.991	0.894	1.1719e-83		KIAA0101	2.52213e-25	-1.05531	0.356	0.796	3.5219e-21		RPL27	6.95608e-10	-1.19459	0.923	1	9.71347e-06
AURKB	7.74207e-84	-0.480608	0.085	0.555	1.0811e-79		UBE2C	1.8347e-65	0.306821	0.969	0.689	2.56198e-61		RPL12	7.95913e-76	0.28709	1	1	1.11141e-71		AURKA	8.5826e-86	0.806059	0.707	0.258	1.19847e-81		H2AFZ	4.04927e-25	-0.652867	0.977	0.999	5.6544e-21		GPX4	7.22896e-10	-1.78032	0.462	0.998	1.00945e-05
ANLN	4.11133e-82	-0.396799	0.085	0.559	5.74106e-78		TYMS	3.54727e-64	0.406458	0.856	0.544	4.95341e-60		RPL41	5.31747e-75	0.257427	1	1	7.42532e-71		HMGB2	1.46308e-84	0.875395	0.965	0.761	2.04304e-80		S100A1	2.04538e-24	-0.576352	0.92	0.995	2.85616e-20		RPS3A	7.37498e-10	-1.12614	0.923	1	1.02984e-05
ASPM	1.28609e-81	-0.451921	0.07	0.536	1.7959e-77		DSCC1	1.13768e-63	0.310339	0.606	0.256	1.58865e-59		PSMA4	1.40794e-74	-0.525704	0.969	0.982	1.96605e-70		TPX2	1.04466e-82	0.759767	0.83	0.429	1.45877e-78		NUDT1	2.15849e-24	-0.609793	0.368	0.864	3.01412e-20		RPS23	7.44334e-10	-1.23997	1	0.999	1.03939e-05
HIST1H4C	1.36486e-81	-1.44886	0.849	0.906	1.90589e-77		CARHSP1	8.70234e-63	0.392108	0.982	0.87	1.21519e-58		TPI1	6.59358e-74	-0.413003	1	0.999	9.20728e-70		CKS1B	2.65261e-81	0.581312	0.997	0.964	3.7041e-77		MT-ATP6	2.62816e-24	-0.596862	0.943	0.997	3.66996e-20		RPL13	7.55864e-10	-1.18446	1	1	1.05549e-05
BIRC5	6.66145e-80	-0.503698	0.194	0.663	9.30205e-76		MCM10	3.52e-62	0.309343	0.558	0.211	4.91532e-58		LMNA	1.25196e-73	-0.632327	0.987	0.992	1.74824e-69		DDX39A	6.49704e-80	0.578037	0.991	0.921	9.07246e-76		MT-ND2	1.5005e-23	-0.542819	0.943	0.998	2.0953e-19		RPL35A	7.89082e-10	-1.01066	1	0.999	1.10187e-05
SMC2	1.36433e-79	-0.465972	0.323	0.762	1.90516e-75		GGCT	9.13915e-62	0.342923	0.989	0.957	1.27619e-57		RPS29	1.31446e-73	0.264836	1	0.999	1.83551e-69		PSRC1	3.59545e-79	0.398865	0.578	0.14	5.02068e-75		GAPDH	1.52988e-23	-0.400021	1	1	2.13633e-19		RPL29	7.91508e-10	-1.25938	1	1	1.10526e-05
RNASEH2A	4.02792e-79	-0.511671	0.808	0.96	5.62459e-75		CDC45	2.46382e-60	0.255203	0.448	0.128	3.44048e-56		SERF2	1.82024e-73	0.299908	1	1	2.54179e-69		TUBB4B	4.77976e-78	0.659739	0.985	0.847	6.67446e-74		CENPF	4.9054e-23	-1.04391	0.149	0.722	6.8499e-19		RPL8	8.08698e-10	-0.823172	1	1	1.12927e-05
PRC1	1.64685e-78	-0.380385	0.065	0.517	2.29966e-74		SIVA1	8.02032e-58	0.327489	1	0.96	1.11996e-53		STMN1	3.09215e-73	-0.631004	1	0.997	4.31788e-69		RAN	3.32038e-77	0.449707	1	0.995	4.63657e-73		SIVA1	1.00756e-22	-0.577201	0.908	0.974	1.40696e-18		RPL23A	8.13676e-10	-1.46387	0.846	1	1.13622e-05
ATAD2	4.86871e-77	-0.562736	0.436	0.815	6.79867e-73		CENPU	5.85417e-57	0.308977	0.611	0.28	8.17477e-53		B2M	9.14276e-73	-0.491596	1	1	1.2767e-68		AURKB	4.7006e-77	0.579362	0.774	0.336	6.56392e-73		TUBA1B	1.47899e-22	-0.685804	0.989	0.998	2.06526e-18		RPL32	8.3645e-10	-1.47924	0.923	1	1.16802e-05
HMMR	4.6745e-76	-0.441836	0.058	0.493	6.52748e-72		RFC4	1.67094e-56	0.344252	0.707	0.38	2.3333e-52		HSPD1	1.19606e-71	-0.495478	0.99	0.994	1.67018e-67		DEPDC1	7.98161e-77	0.409419	0.557	0.138	1.11455e-72		EIF6	1.50947e-22	0.630307	1	0.93	2.10783e-18		RPL21	8.39018e-10	-1.36404	0.769	0.999	1.1716e-05
CCNA2	7.45167e-76	-0.370313	0.04	0.473	1.04055e-71		CDCA5	5.37584e-55	0.295373	0.591	0.254	7.50682e-51		SSBP1	6.82171e-71	-0.480226	0.954	0.984	9.52584e-67		CKS2	1.86657e-74	1.04811	0.977	0.941	2.60648e-70		MT-ND1	2.20651e-22	-0.522498	0.954	0.997	3.08118e-18		RPL13A	8.57214e-10	-1.02613	1	1	1.19701e-05
UBE2S	7.72667e-76	-0.742082	0.94	0.981	1.07895e-71		ZWINT	7.74237e-53	0.336492	0.694	0.376	1.08114e-48		HNRNPK	8.08787e-71	-0.512996	0.967	0.977	1.12939e-66		CENPA	1.52348e-73	0.713965	0.727	0.316	2.12739e-69		CENPW	2.60906e-22	-0.526985	0.092	0.677	3.64329e-18		RPS11	8.73116e-10	-1.04498	1	1	1.21922e-05
CEP55	3.85325e-75	-0.370404	0.1	0.548	5.38068e-71		MCM7	4.5794e-52	0.336495	0.873	0.622	6.39467e-48		MYL12B	2.06283e-70	-0.410283	1	0.999	2.88054e-66		ARL6IP1	1.76742e-73	0.729536	0.871	0.585	2.46803e-69		DDIT3	5.95707e-22	0.532532	0.448	0.124	8.31845e-18		YBX1	9.16942e-10	-1.26821	1	1	1.28042e-05
CDK1	1.65565e-74	-0.456266	0.083	0.521	2.31195e-70		HIST1H1E	3.3382e-51	0.259636	0.486	0.179	4.66147e-47		HNRNPA2B1	3.74174e-69	-0.514727	0.992	0.993	5.22496e-65		HMGB3	2.38028e-71	0.534283	0.994	0.918	3.32383e-67		CDC20	6.20181e-22	-1.36208	0.391	0.839	8.66021e-18		MT-CO2	9.8072e-10	1.00635	1	0.997	1.36948e-05
NDC80	7.32521e-73	-0.390464	0.05	0.474	1.02289e-68		DNAJC9	7.82544e-51	0.33686	0.864	0.661	1.09274e-46		PSMB1	6.52723e-69	-0.452423	0.99	0.995	9.11463e-65		ASPM	1.55624e-69	0.621131	0.727	0.324	2.17313e-65		MT-ND5	1.53209e-21	-0.540192	0.839	0.994	2.13942e-17		RPL19	9.89746e-10	-1.01672	1	0.999	1.38208e-05
CDCA3	6.11155e-71	-0.44473	0.083	0.503	8.53418e-67		RAD51AP1	1.89718e-50	0.270699	0.558	0.246	2.64923e-46		PSMD4	4.86752e-68	-0.455221	0.995	0.993	6.797e-64		NMU	7.75801e-69	0.434049	0.674	0.236	1.08333e-64		HIST1H4C	4.45451e-21	-1.5371	0.609	0.902	6.22027e-17		RPL34	9.89746e-10	-1.32488	1	1	1.38208e-05
UBE2T	3.48064e-70	-0.483229	0.62	0.893	4.86037e-66		PKMYT1	6.23504e-50	0.30195	0.674	0.355	8.70661e-46		METRN	2.03286e-67	0.413952	0.995	0.922	2.83869e-63		KIF20A	2.25732e-64	0.280394	0.419	0.082	3.15212e-60		GPX4	5.85552e-21	-0.431816	0.989	0.995	8.17665e-17		RPL12	1.00804e-09	-1.78249	1	1	1.40763e-05
PKMYT1	7.6159e-70	-0.347368	0.138	0.577	1.06348e-65		DNMT1	2.54736e-48	0.324452	0.947	0.813	3.55713e-44		PHGDH	3.42934e-67	-0.599977	1	0.997	4.78873e-63		SGOL2	3.30675e-63	0.402457	0.598	0.213	4.61754e-59		TMEM160	7.2983e-21	-0.541498	0.678	0.953	1.01913e-16		RPL30	1.01421e-09	-0.867731	1	1	1.41625e-05
CENPA	1.01319e-69	-0.517467	0.098	0.514	1.41482e-65		CDT1	7.02302e-48	0.333695	0.678	0.379	9.80694e-44		MRPL13	3.12835e-66	-0.46415	0.872	0.939	4.36843e-62		LMNA	3.84411e-63	0.502894	1	0.989	5.36791e-59		MKI67	7.47231e-21	-0.870495	0.126	0.654	1.04343e-16		RPS16	1.17388e-09	-0.93151	1	1	1.63921e-05
DEK	4.50163e-69	-0.381501	0.909	0.985	6.28607e-65		TK1	6.21147e-47	0.374288	0.842	0.585	8.6737e-43		CFL1	4.95299e-66	-0.366285	1	1	6.91635e-62		KIF4A	4.6834e-63	0.287875	0.487	0.122	6.5399e-59		LMNA	1.03986e-20	0.609063	1	0.99	1.45206e-16		MT-ND5	1.20273e-09	1.04285	1	0.987	1.67949e-05
SPC25	1.57902e-67	-0.333764	0.04	0.441	2.20494e-63		CHAF1A	7.22241e-47	0.287016	0.67	0.364	1.00854e-42		MYL12A	6.03397e-66	-0.427076	1	0.998	8.42583e-62		HNRNPA2B1	1.32295e-62	0.453065	1	0.991	1.84736e-58		C6orf48	1.99482e-20	0.694616	0.931	0.768	2.78556e-16		MALAT1	1.21748e-09	1.6881	1	0.999	1.70009e-05
CDCA5	7.57521e-67	-0.300961	0.061	0.472	1.0578e-62		IMPA2	2.08987e-46	0.341448	0.945	0.796	2.9183e-42		HEBP2	6.61447e-66	0.417113	1	0.997	9.23645e-62		HMGN2	3.56106e-62	0.437805	1	0.986	4.97266e-58		CKS1B	2.37439e-20	-0.634821	0.851	0.975	3.3156e-16		RPL7	1.3055e-09	-0.981416	1	1	1.82299e-05
SIVA1	4.04412e-66	-0.390295	0.947	0.982	5.64721e-62		CDK1	5.17195e-46	0.286964	0.632	0.295	7.22212e-42		PSMD2	1.20746e-64	-0.499169	0.862	0.93	1.68609e-60		CCNA2	8.91175e-60	0.469074	0.651	0.276	1.24444e-55		PTTG1	2.71464e-20	-0.923836	0.23	0.723	3.79073e-16		RPS27A	1.32142e-09	-0.925014	1	1	1.84524e-05
RPL39L	1.15707e-63	-0.406999	0.72	0.922	1.61573e-59		BRCA2	1.91833e-45	0.276499	0.602	0.305	2.67875e-41		PPP1R14B	2.02665e-64	0.349274	1	0.989	2.83002e-60		BUB1	1.04417e-58	0.29977	0.457	0.114	1.45807e-54		MZT2B	5.22301e-20	-0.457877	0.943	0.994	7.29341e-16		PPDPF	1.3416e-09	-1.54467	0.538	0.998	1.87341e-05
AURKA	2.78798e-62	-0.501283	0.07	0.452	3.89313e-58		SLBP	2.59985e-45	0.352536	0.904	0.732	3.63043e-41		FTL	1.07258e-63	0.338416	1	0.999	1.49775e-59		RAD21	1.04714e-58	0.503111	0.968	0.858	1.46222e-54		LY6E	6.76352e-20	-0.413506	0.989	0.999	9.44458e-16		RPSA	1.35385e-09	-0.982453	1	0.999	1.89052e-05
PLK1	3.5785e-62	-0.425939	0.041	0.417	4.99701e-58		STMN1	5.51666e-45	0.294077	1	0.997	7.70347e-41		HSP90AA1	1.45489e-63	-0.478022	1	0.999	2.03161e-59		GPSM2	3.02501e-58	0.44511	0.733	0.362	4.22412e-54		STMN1	8.51479e-20	-0.606178	0.977	0.999	1.18901e-15		RPL37	1.36414e-09	-1.09555	0.769	0.999	1.90489e-05
RHEB	6.50848e-62	-0.347541	0.934	0.989	9.08844e-58		SMC2	6.99409e-45	0.307344	0.832	0.551	9.76655e-41		TXN	2.13866e-62	-0.310014	1	0.999	2.98642e-58		PHF19	2.09743e-57	0.460406	0.894	0.589	2.92886e-53		PTMS	4.33487e-19	-0.499575	0.931	0.989	6.05322e-15		RPLP1	1.39548e-09	-1.20026	1	1	1.94864e-05
CLSPN	6.54692e-62	-0.403224	0.226	0.63	9.14212e-58		GINS2	1.63092e-44	0.315507	0.683	0.396	2.27742e-40		SDHC	1.0795e-61	-0.430407	0.928	0.958	1.50742e-57		MKI67	7.79372e-57	0.664084	0.897	0.575	1.08832e-52		TK1	5.11272e-19	-0.5229	0.172	0.678	7.13941e-15		RPL27A	1.50963e-09	-0.942078	1	1	2.10804e-05
ZWINT	4.31416e-61	-0.345491	0.181	0.588	6.0243e-57		POLD3	4.85461e-44	0.257052	0.621	0.327	6.77897e-40		PGK1	1.27517e-61	-0.555542	0.88	0.943	1.78064e-57		CEP55	1.87118e-56	0.407064	0.73	0.345	2.61292e-52		ASNS	5.57984e-19	0.400922	0.414	0.114	7.79169e-15		FTH1	1.52798e-09	-1.18071	1	1	2.13367e-05
IMPA2	4.74629e-60	-0.407983	0.692	0.9	6.62771e-56		DEK	5.87757e-44	0.299823	0.996	0.948	8.20744e-40		SSB	2.49297e-61	-0.447619	1	0.998	3.48118e-57		RBM8A	2.28558e-56	0.382597	1	0.994	3.19158e-52		PPDPF	6.45512e-19	-0.393795	1	0.995	9.01393e-15		CCT3	1.62794e-09	1.00092	1	0.997	2.27326e-05
RAD51AP1	1.77824e-58	-0.266518	0.068	0.447	2.48313e-54		CDCA4	1.16788e-43	0.298618	0.772	0.516	1.63083e-39		GUK1	1.59629e-60	0.299652	1	0.995	2.22906e-56		PRR11	2.35582e-56	0.278937	0.493	0.137	3.28966e-52		HMGB2	6.64177e-19	-0.995068	0.483	0.81	9.27456e-15		RPL36	1.66768e-09	-1.18898	0.923	1	2.32874e-05
KIF20B	2.00164e-58	-0.311076	0.088	0.466	2.79509e-54		SMC4	8.85233e-43	0.316309	0.939	0.659	1.23614e-38		CCT3	1.66696e-59	-0.427801	1	0.997	2.32774e-55		NDC80	1.13239e-55	0.468859	0.657	0.28	1.58127e-51		KRT7	8.24565e-19	0.573124	0.989	0.994	1.15142e-14		RPS12	1.68282e-09	-1.74472	0.846	1	2.34989e-05
LSM4	6.22114e-57	-0.311251	0.977	0.993	8.6872e-53		UNG	1.01902e-42	0.278271	0.626	0.336	1.42295e-38		PPDPF	4.09669e-59	0.283982	1	0.994	5.72062e-55		SMC4	3.87458e-55	0.516574	0.95	0.692	5.41046e-51		METRN	1.04542e-18	-0.507471	0.805	0.942	1.45983e-14		RPL41	1.68282e-09	-0.849567	1	1	2.34989e-05
C19orf43	9.8545e-56	-0.271957	0.998	0.997	1.37608e-51		HMGB2	2.12627e-42	0.330475	0.974	0.728	2.96913e-38		SRSF7	5.58318e-59	-0.451782	0.969	0.972	7.79635e-55		FAM64A	1.00487e-54	0.284585	0.587	0.199	1.4032e-50		ZFAS1	1.11199e-18	0.885568	0.966	0.973	1.55278e-14		FTL	1.69299e-09	-1.42756	0.923	1	2.36409e-05
DUT	5.57856e-55	-0.40938	0.818	0.945	7.78991e-51		STRA13	3.96662e-41	0.305388	0.978	0.863	5.53899e-37		EPCAM	6.242e-59	-0.459473	0.992	0.993	8.71633e-55		PTGES3	3.29863e-54	0.451855	0.991	0.94	4.60621e-50		CRABP2	2.20294e-18	-0.610131	0.644	0.934	3.07618e-14		RPS28	1.72386e-09	-1.0933	1	1	2.40719e-05
MAD2L1	1.30836e-53	-0.31278	0.174	0.559	1.827e-49		WDR34	9.11324e-41	0.303946	0.974	0.914	1.27257e-36		TMSB10	1.63219e-58	0.288807	1	0.999	2.27919e-54		PRC1	6.9527e-54	0.451792	0.674	0.318	9.70876e-50		ANXA3	4.38413e-18	0.417843	0.667	0.309	6.122e-14		RPL18	1.72906e-09	-0.792981	1	1	2.41445e-05
RANBP1	2.5069e-53	-0.317415	0.97	0.992	3.50064e-49		RFC2	2.31056e-40	0.308955	0.796	0.573	3.22647e-36		EIF3I	3.84649e-58	-0.461454	0.88	0.921	5.37123e-54		SAPCD2	6.58593e-53	0.38756	0.721	0.347	9.19659e-49		RPL41	4.64046e-18	-0.287555	1	1	6.47993e-14		ATP5E	1.73427e-09	-1.35776	0.462	0.999	2.42173e-05
WDR34	1.59156e-52	-0.350379	0.867	0.958	2.22246e-48		MCM5	1.57831e-39	0.264436	0.575	0.301	2.20395e-35		NDUFS2	4.50005e-57	-0.470509	0.872	0.928	6.28388e-53		CALM2	1.67144e-52	0.516943	1	0.999	2.334e-48		YIF1A	7.16836e-18	0.417456	1	0.968	1.00099e-13		RPS15	1.74474e-09	-0.83485	1	1	2.43636e-05
KIF23	1.04354e-51	-0.273372	0.048	0.385	1.4572e-47		EMP2	1.71401e-38	0.324359	0.751	0.536	2.39344e-34		RBM8A	9.10649e-57	-0.411407	0.992	0.996	1.27163e-52		KIF2C	6.60578e-52	0.25902	0.411	0.098	9.22431e-48		TNFRSF12A	8.72923e-18	0.740519	0.966	0.923	1.21895e-13		SON	2.06638e-09	1.45839	1	0.737	2.8855e-05
BCL2L12	5.62105e-51	-0.344192	0.735	0.924	7.84924e-47		CKS1B	4.4512e-38	0.263174	0.998	0.959	6.21566e-34		HSP90AB1	7.81434e-56	-0.529734	0.995	0.994	1.09119e-51		CLIC1	2.71012e-51	0.371415	0.991	0.988	3.78441e-47		HINT1	9.06161e-18	-0.319858	1	0.998	1.26536e-13		RPL37A	2.10177e-09	-0.9437	1	1	2.93491e-05
CENPE	7.35829e-51	-0.30767	0.027	0.343	1.02751e-46		MCM4	7.34544e-38	0.265309	0.746	0.505	1.02572e-33		PSMC4	1.77753e-55	-0.502745	0.798	0.889	2.48214e-51		KIF20B	7.15036e-51	0.408671	0.645	0.29	9.98477e-47		PRDX2	1.07335e-17	-0.351729	1	1	1.49882e-13		MT-ND6	2.18095e-09	1.10402	1	0.643	3.04548e-05
RAD23A	8.40618e-51	-0.257729	0.998	0.999	1.17384e-46		CENPM	2.96164e-36	0.258179	0.641	0.381	4.13563e-32		CCT5	3.64387e-53	-0.495547	0.795	0.88	5.0883e-49		TUBA1C	7.75099e-51	0.506872	0.953	0.832	1.08235e-46		RRM2	1.51704e-17	-0.571341	0.08	0.582	2.1184e-13		RPS8	2.23812e-09	-0.998355	1	0.999	3.1253e-05
HES4	9.32759e-50	-0.348527	0.985	0.995	1.30251e-45		MKI67	6.4198e-36	0.292451	0.862	0.544	8.9646e-32		HES4	5.21944e-53	0.340742	1	0.99	7.28842e-49		NEK2	1.00203e-50	0.329068	0.51	0.171	1.39924e-46		BIRC5	1.71088e-17	-0.522154	0.046	0.542	2.38907e-13		RPL15	2.27183e-09	-0.89674	1	0.999	3.17238e-05
DBF4	1.19636e-49	-0.365994	0.554	0.835	1.6706e-45		GMNN	1.3473e-34	0.279633	0.726	0.498	1.88138e-30		ANXA2	5.28368e-53	-0.325203	1	1	7.37813e-49		ILVBL	6.20029e-50	0.403951	0.845	0.537	8.65809e-46		MMP7	1.81481e-17	1.11695	0.943	0.918	2.53419e-13		RPL26	2.49216e-09	-1.14145	1	0.999	3.48005e-05
HIST1H1A	5.55963e-49	-0.338762	0.046	0.364	7.76347e-45		DHFR	2.77126e-34	0.255763	0.7	0.449	3.86978e-30		MAGOH	1.63598e-52	-0.381734	0.99	0.984	2.28449e-48		HSP90AA1	2.25378e-49	0.412541	1	0.999	3.14718e-45		MIF	1.85488e-17	-0.373918	0.943	0.992	2.59016e-13		DYNLL1	2.52206e-09	-1.30606	0.692	0.997	3.5218e-05
TK1	1.21389e-48	-0.379683	0.431	0.754	1.69507e-44		NUSAP1	7.2878e-34	0.253598	0.759	0.444	1.01767e-29		CALM2	5.54012e-52	-0.456635	0.997	1	7.73622e-48		CNIH4	2.52806e-48	0.394711	0.979	0.889	3.53018e-44		FARSA	2.2637e-17	0.528979	0.966	0.902	3.16103e-13		RPS2	2.59836e-09	-0.873474	1	1	3.62835e-05
CDKN2D	1.35588e-48	-0.322094	0.189	0.543	1.89335e-44		TUBG1	1.11242e-31	0.259894	0.856	0.672	1.55338e-27		PSMA3	5.80933e-52	-0.422887	0.9	0.932	8.11215e-48		KIF5B	2.97396e-48	0.411532	0.979	0.913	4.15283e-44		ARPC1B	3.1251e-17	-0.46751	0.931	0.986	4.36389e-13		RPL9	2.75775e-09	-1.06297	0.923	1	3.85093e-05
CCNB2	3.04779e-48	-0.436399	0.174	0.524	4.25593e-44		PTMS	2.37735e-31	-0.261528	0.982	0.989	3.31973e-27		PSMD8	1.22703e-51	-0.376451	0.985	0.989	1.71343e-47		FSCN1	9.39745e-48	0.391614	0.991	0.955	1.31226e-43		MT2A	3.48554e-17	-0.668357	0.483	0.872	4.86721e-13		RPS13	2.85792e-09	-1.09351	0.923	1	3.9908e-05
DLGAP5	7.24468e-47	-0.272788	0.038	0.343	1.01165e-42		HIST1H1C	2.55425e-29	0.259193	0.705	0.472	3.56675e-25		MZT2B	1.51746e-51	0.284285	1	0.99	2.11898e-47		UBB	3.0547e-47	0.343759	1	0.999	4.26559e-43		LGALS1	4.63284e-17	-0.876054	0.92	0.978	6.4693e-13		RPS5	3.00591e-09	-0.889873	1	1	4.19745e-05
CENPU	2.38585e-46	-0.254811	0.133	0.476	3.3316e-42		USP1	4.12219e-27	0.251827	0.812	0.666	5.75622e-23		PSMC3	1.97034e-51	-0.408777	0.951	0.95	2.75138e-47		H2AFZ	2.00155e-45	0.325393	1	0.998	2.79496e-41		HIST2H2BE	4.66153e-17	0.337631	0.414	0.12	6.50936e-13		CHCHD2	3.01932e-09	-0.972473	0.846	1	4.21618e-05
ZDHHC12	2.04752e-45	-0.308755	0.891	0.961	2.85916e-41		LDHA	2.45177e-25	-0.314191	0.994	0.994	3.42365e-21		PSMB2	2.10714e-51	-0.407779	0.985	0.981	2.94242e-47		E2F1	2.95077e-45	-0.452639	0.208	0.608	4.12046e-41		SARS	5.21545e-17	0.609268	0.828	0.565	7.28286e-13		RPS27	3.0238e-09	-1.32617	0.923	1	4.22244e-05
H2AFX	2.58016e-45	-0.264059	0.169	0.517	3.60293e-41		KLF2	2.77036e-25	0.267251	0.608	0.399	3.86853e-21		IFITM3	2.27913e-51	-0.426922	0.997	0.989	3.18257e-47		CYCS	5.08663e-45	0.339817	1	0.994	7.10297e-41		NME4	5.51442e-17	-0.431022	0.954	0.986	7.70033e-13		RPL24	3.40425e-09	-1.04936	1	0.999	4.75369e-05
CENPM	6.72875e-45	-0.274764	0.212	0.558	9.39603e-41		SMC1A	6.57694e-22	0.270959	0.808	0.668	9.18404e-18		PSMB6	6.70137e-51	-0.401125	0.985	0.982	9.3578e-47		ILF2	2.63583e-44	0.434754	0.988	0.982	3.68068e-40		WDR74	7.19455e-17	0.495274	0.897	0.714	1.00465e-12		RPL38	3.5272e-09	-0.942519	0.923	0.999	4.92538e-05
VKORC1	7.7576e-45	-0.30289	0.834	0.961	1.08327e-40		RARRES1	7.72662e-20	0.278021	0.958	0.875	1.07895e-15		PSMA1	1.96891e-49	-0.414466	0.859	0.906	2.74939e-45		CDCA8	7.87905e-44	0.283899	0.455	0.148	1.10023e-39		DCAF13	1.06745e-16	0.559631	0.931	0.776	1.49059e-12		HSPA5	3.58708e-09	1.67602	1	0.603	5.009e-05
BRCA2	2.95154e-44	-0.258659	0.151	0.49	4.12153e-40		KHDRBS3	2.22993e-18	-0.250135	0.779	0.878	3.11387e-14		ANXA1	4.72551e-49	-0.622805	0.972	0.952	6.5987e-45		HNRNPR	1.32201e-42	0.388698	0.974	0.85	1.84606e-38		PHF19	1.17135e-16	-0.495517	0.218	0.661	1.63567e-12		HSP90AB1	3.96905e-09	1.32691	1	0.994	5.54238e-05
E2F1	5.61024e-44	-0.36332	0.32	0.635	7.83414e-40		CRABP2	3.44552e-15	0.260199	0.965	0.905	4.81132e-11		MDH1	5.51807e-49	-0.422219	0.555	0.769	7.70544e-45		KPNA2	9.06253e-42	0.626045	0.754	0.489	1.26549e-37		SCNM1	1.19842e-16	0.444373	0.897	0.735	1.67348e-12		TMSB10	3.98077e-09	-1.11549	0.923	1	5.55875e-05
CDKN3	1.65661e-42	-0.531601	0.569	0.824	2.31328e-38		VIM	5.45368e-15	-0.341177	0.464	0.63	7.61552e-11		PKM	1.95307e-48	-0.371876	0.997	0.997	2.72726e-44		GSPT1	1.07038e-41	0.344467	0.977	0.931	1.49468e-37		ZFAND2A	1.6998e-16	0.378603	0.609	0.278	2.3736e-12		GTF3A	4.10577e-09	-1.17195	0.923	0.997	5.7333e-05
DTYMK	4.17875e-42	-0.308287	0.489	0.787	5.83521e-38		PTTG1	7.09338e-14	-0.557578	0.696	0.703	9.90519e-10		TMED9	2.51358e-47	-0.395139	0.934	0.95	3.50997e-43		CENPW	1.617e-41	0.378232	0.874	0.605	2.25798e-37		ARL6IP4	1.88842e-16	-0.4349	0.828	0.96	2.63698e-12		HINT1	4.49093e-09	-0.936738	0.923	0.999	6.27113e-05
TMEM106C	1.85117e-41	-0.319967	0.604	0.841	2.58498e-37		MGP	8.98864e-14	0.258584	0.772	0.669	1.25517e-09		ERH	1.38492e-46	-0.310307	0.995	0.991	1.9339e-42		PBK	2.48188e-41	0.271186	0.525	0.203	3.4657e-37		SLC3A2	2.10456e-16	0.913556	0.839	0.663	2.93881e-12		HSPA8	4.56899e-09	1.46819	1	0.972	6.38014e-05
RPA3	1.03031e-40	-0.33713	0.808	0.931	1.43872e-36		H1F0	2.04753e-09	0.291496	0.941	0.922	2.85918e-05		DCAF13	3.96465e-46	-0.443559	0.678	0.808	5.53623e-42		GTSE1	6.75571e-41	0.31664	0.487	0.18	9.43368e-37		ANP32E	2.20899e-16	-0.524788	0.77	0.918	3.08463e-12		DDX5	4.80035e-09	1.33918	1	0.84	6.70321e-05
CCNB1	4.32791e-40	-0.426952	0.111	0.407	6.04349e-36		HSPA5	2.56841e-08	-0.252664	0.517	0.639	0.000358653		PUF60	4.60848e-46	-0.384093	0.946	0.957	6.43528e-42		KIF23	3.3615e-40	0.366644	0.534	0.23	4.69399e-36		EIF4A1	2.43915e-16	0.621809	0.977	0.989	3.40603e-12		C19orf53	4.90396e-09	-1.11597	0.692	0.999	6.84789e-05
STRA13	1.23003e-38	-0.314587	0.816	0.929	1.71762e-34		UBE2S	4.05045e-08	-0.415733	0.985	0.962	0.000565604		BRI3	5.69113e-46	0.324412	0.997	0.906	7.9471e-42		ECT2	3.55167e-40	0.282793	0.522	0.21	4.95955e-36		MT-ND3	2.4745e-16	-0.463683	0.839	0.997	3.45539e-12		APP	4.96509e-09	1.0937	1	0.864	6.93325e-05
CCDC34	3.45411e-38	-0.309542	0.65	0.852	4.82332e-34		CDKN3	4.64084e-08	-0.339353	0.755	0.743	0.000648046		XRCC6	1.1418e-45	-0.428205	0.731	0.815	1.59441e-41		HDGF	3.7659e-40	0.3407	0.982	0.938	5.25871e-36		SF3B2	2.75287e-16	0.576584	0.943	0.868	3.84411e-12		SH3BGRL3	5.10167e-09	-1.50944	0.615	0.998	7.12397e-05
SAP30	7.18821e-38	-0.306361	0.363	0.668	1.00376e-33		CCNB1	5.94904e-08	-0.299024	0.249	0.343	0.000830724		EIF1	6.34773e-45	-0.314222	1	0.998	8.86397e-41		CCND1	1.52351e-39	0.418642	0.997	0.982	2.12743e-35		MALAT1	2.99629e-16	0.585591	1	0.999	4.18402e-12		RPS3	5.24544e-09	-0.781926	1	1	7.32473e-05
CDCA4	4.48922e-37	-0.281766	0.373	0.679	6.26875e-33									PRMT1	1.11199e-44	-0.383693	0.964	0.952	1.55278e-40		CKAP2	2.92253e-39	0.341805	0.628	0.322	4.08102e-35		RPL39L	3.98743e-16	-0.4837	0.529	0.876	5.56805e-12		SERF2	5.40102e-09	-1.0702	1	1	7.54198e-05
CDC42EP1	2.37943e-36	-0.315894	0.668	0.86	3.32263e-32									PSMB7	1.15565e-44	-0.338483	0.995	0.991	1.61375e-40		NUSAP1	6.98179e-39	0.560515	0.748	0.485	9.74937e-35		KRT23	4.8417e-16	0.961099	0.851	0.735	6.76095e-12		MT-ATP6	5.57733e-09	0.926397	1	0.995	7.78818e-05
DNAJC9	5.85569e-36	-0.277498	0.539	0.795	8.17689e-32									PSMA5	3.09066e-44	-0.399119	0.923	0.929	4.3158e-40		TPI1	3.04058e-38	0.260061	1	0.999	4.24587e-34		PFDN2	5.59018e-16	0.358618	1	0.998	7.80613e-12		RPLP0	5.62639e-09	-0.687758	1	1	7.8567e-05
CARHSP1	1.32543e-35	-0.299718	0.839	0.928	1.85084e-31									DDX5	5.37763e-44	-0.430661	0.765	0.859	7.50932e-40		TAGLN2	3.6881e-38	0.335138	1	0.997	5.15006e-34		SMC4	6.96798e-16	-0.560257	0.322	0.755	9.73009e-12		UBE2S	5.64804e-09	-2.00543	0.154	0.974	7.88692e-05
HELLS	2.41959e-35	-0.285111	0.322	0.627	3.37872e-31									ALDOA	5.97708e-44	-0.27841	1	0.999	8.34639e-40		HN1	1.02175e-37	0.400567	0.982	0.971	1.42677e-33		RPS28	1.08097e-15	-0.271056	1	1	1.50946e-11		TMSB4X	6.09604e-09	-1.43364	0.923	0.999	8.51251e-05
HMG20B	2.82719e-35	-0.29473	0.537	0.786	3.94789e-31									MT-ATP6	9.58143e-44	0.252524	1	0.994	1.33795e-39		PTMA	1.69508e-37	0.250065	1	1	2.36702e-33		IFRD1	1.09033e-15	0.488511	0.667	0.353	1.52254e-11		UBA52	6.54641e-09	-1.11756	0.923	1	9.14141e-05
FEN1	1.91206e-34	-0.319495	0.43	0.731	2.67e-30									HLA-C	2.61597e-43	-0.411637	0.895	0.924	3.65294e-39		G2E3	2.60462e-37	0.261386	0.437	0.156	3.63709e-33		ATAD2	1.31342e-15	-0.576199	0.31	0.718	1.83406e-11		SSB	7.56817e-09	0.916746	1	0.998	0.000105682
GPSM2	3.26196e-34	-0.257635	0.217	0.517	4.555e-30									NENF	6.35587e-43	0.276691	0.997	0.972	8.87534e-39		MAD2L1	5.6669e-37	0.331367	0.704	0.387	7.91326e-33		LGALS3	1.38145e-15	0.547153	0.966	0.978	1.92905e-11		RPL28	8.18275e-09	-1.11924	1	1	0.000114264
PHF19	2.88438e-33	-0.289997	0.438	0.731	4.02775e-29									ATP5B	1.06211e-42	-0.369135	0.987	0.987	1.48313e-38		MRPL51	1.16586e-36	0.26711	1	0.991	1.62801e-32		CCT3	1.76239e-15	0.384867	1	0.997	2.461e-11		RPL10	8.27784e-09	-0.927023	1	1	0.000115592
NUCKS1	3.72702e-32	-0.299527	0.993	0.996	5.20441e-28									NQO1	1.34938e-42	-0.398208	0.803	0.874	1.88428e-38		ANLN	1.36012e-36	0.343331	0.674	0.36	1.89928e-32		SLC2A4RG	2.53104e-15	-0.398601	0.264	0.7	3.53435e-11		HNRNPM	8.27834e-09	1.30387	1	0.869	0.000115599
IFITM3	5.73422e-32	0.254962	0.993	0.99	8.00726e-28									NUDC	1.89453e-42	-0.381723	0.854	0.892	2.64552e-38		GGH	1.7849e-36	0.33609	0.815	0.561	2.49244e-32		UBE2C	3.33144e-15	-0.808599	0.379	0.784	4.65203e-11		PPP1R14B	8.79479e-09	-1.49546	0.385	0.995	0.00012281
KIF5B	1.48843e-31	-0.29125	0.861	0.953	2.07845e-27									SIVA1	1.90914e-42	0.302896	1	0.964	2.66593e-38		FTH1	1.22267e-35	-0.274486	1	1	1.70733e-31		NT5DC2	3.71684e-15	-0.436292	0.724	0.912	5.1902e-11		NASP	8.89479e-09	0.957273	1	0.73	0.000124207
HNRNPAB	2.06507e-31	-0.252271	0.891	0.965	2.88367e-27									PPIE	3.00757e-42	-0.365956	0.793	0.859	4.19977e-38		SRSF7	1.66453e-34	0.340069	0.982	0.969	2.32434e-30		DUT	4.73704e-15	-0.497377	0.678	0.917	6.6148e-11		RPS24	1.03617e-08	-0.999316	1	1	0.000144691
PGP	1.2863e-29	-0.261035	0.688	0.855	1.79619e-25									CDC123	1.24721e-41	-0.372212	0.803	0.872	1.7416e-37		TUBB6	2.83817e-34	0.365055	0.941	0.861	3.96322e-30		DAP3	6.15111e-15	0.416305	0.92	0.906	8.58941e-11		RPL23	1.16532e-08	-0.846403	1	0.999	0.000162726
DNMT1	3.73525e-29	-0.255283	0.746	0.895	5.2159e-25									POMP	1.35836e-41	-0.256657	0.997	0.997	1.89681e-37		TUBA1B	5.08038e-34	0.323775	1	0.997	7.09424e-30		UBE2S	1.07369e-14	-0.829743	0.92	0.971	1.4993e-10		UQCRH	1.545e-08	-1.14808	0.769	0.999	0.000215744
PTTG1	9.94111e-29	-0.467319	0.534	0.775	1.38818e-24									BSG	1.45688e-41	-0.335236	0.99	0.981	2.03438e-37		TOP2A	9.28441e-34	0.586762	0.619	0.37	1.29648e-29		PPIE	1.34979e-14	0.419846	0.943	0.841	1.88484e-10		RPS18	1.61442e-08	-0.816098	1	1	0.000225438
ARL6IP1	2.71698e-28	-0.365131	0.471	0.706	3.794e-24									SNRPD3	1.67002e-41	-0.342377	0.9	0.919	2.33202e-37		PPIH	3.87061e-33	0.327642	0.938	0.822	5.40493e-29		BUD31	1.51864e-14	0.422207	0.954	0.897	2.12063e-10		MZT2B	1.8104e-08	-0.910097	0.846	0.993	0.000252804
EIF5	1.32771e-27	-0.301843	0.806	0.931	1.85401e-23									FABP5	2.54544e-41	-0.312344	1	0.997	3.55446e-37		NUDT1	7.86376e-33	0.305961	0.977	0.814	1.0981e-28		ATF4	1.75069e-14	0.508676	0.851	0.708	2.44466e-10		OST4	1.86225e-08	-0.988663	0.692	0.997	0.000260044
RAD21	2.33085e-27	-0.300046	0.783	0.919	3.2548e-23									SH3BGRL3	3.52497e-41	0.265053	1	0.995	4.92226e-37		HSPD1	1.07431e-32	0.296371	1	0.991	1.50017e-28		NGFRAP1	1.81603e-14	-0.469776	0.724	0.944	2.53591e-10		RPS26	1.89404e-08	-1.14997	0.769	0.996	0.000264484
STMN1	4.88816e-27	-0.345813	0.997	0.999	6.82582e-23									RAN	5.98609e-41	-0.330206	1	0.994	8.35898e-37		TACC3	1.92453e-32	0.258565	0.469	0.194	2.68742e-28		TAX1BP1	1.91585e-14	0.442969	0.92	0.821	2.6753e-10		LMNA	1.93723e-08	1.05228	1	0.991	0.000270515
ANP32E	1.096e-26	-0.295726	0.841	0.942	1.53046e-22									LAPTM4A	1.70443e-40	-0.422542	0.88	0.919	2.38007e-36		AKIRIN2	2.41965e-32	0.333724	0.853	0.668	3.3788e-28		SF3B14	2.39393e-14	0.347035	1	0.998	3.34288e-10		TPT1	2.0495e-08	-1.12723	0.462	0.996	0.000286192
KPNA2	7.587e-26	-0.351885	0.362	0.611	1.05945e-21									IMPDH2	2.35644e-40	-0.402979	0.918	0.934	3.29054e-36		FAM83D	8.00515e-32	0.333068	0.501	0.236	1.11784e-27		HSPA8	2.57334e-14	0.512776	0.989	0.971	3.59341e-10		C9orf16	2.54337e-08	-1.32222	0.154	0.986	0.000355157
PSMC4	1.47849e-25	0.258358	0.924	0.848	2.06457e-21									PTGES3	7.61001e-40	-0.372327	0.944	0.95	1.06266e-35		EPCAM	3.72726e-31	0.305032	0.997	0.992	5.20475e-27		MED8	3.70114e-14	0.45818	0.92	0.796	5.16827e-10		PSAP	2.8504e-08	0.996176	1	0.739	0.00039803
HN1	3.69895e-23	-0.264986	0.955	0.981	5.16522e-19									CD63	1.43741e-39	-0.340429	0.997	0.989	2.0072e-35		CALM3	4.32325e-31	0.306903	0.962	0.872	6.03699e-27		SMC2	4.15793e-14	-0.41747	0.23	0.647	5.80613e-10		ATP1A1	2.86105e-08	1.12233	1	0.751	0.000399518
DDX39A	2.17822e-21	-0.274397	0.876	0.959	3.04166e-17									CCT4	2.66018e-39	-0.396949	0.88	0.916	3.71467e-35		H2AFV	6.43461e-31	0.263916	0.994	0.974	8.98529e-27		MRPS30	4.99163e-14	0.310495	0.609	0.289	6.97031e-10		RPL6	2.93273e-08	-0.748483	1	1	0.000409526
H1FX	1.42016e-20	-0.25982	0.879	0.942	1.98311e-16									MRPL3	3.89624e-39	-0.358383	0.885	0.895	5.44071e-35		HNRNPK	2.3123e-30	0.304854	0.994	0.971	3.2289e-26		EIF3G	6.02956e-14	0.396686	0.954	0.916	8.41968e-10		PFN1	3.04078e-08	-0.724265	1	0.999	0.000424614
CALM2	2.52051e-20	-0.273712	1	0.999	3.51964e-16									TAGLN2	4.13048e-39	-0.332472	1	0.997	5.7678e-35		SRSF3	3.28447e-30	0.273971	0.994	0.985	4.58643e-26		GGH	6.24356e-14	-0.391057	0.172	0.625	8.71851e-10		TCEB2	3.05774e-08	-0.962282	0.692	0.998	0.000426983
PCNA	7.6537e-19	-0.250657	0.496	0.709	1.06876e-14									ATP5G3	4.20911e-39	-0.26626	1	0.997	5.87761e-35		PNO1	3.78073e-30	0.341258	0.739	0.469	5.27941e-26		RANBP1	6.36719e-14	-0.379626	0.943	0.987	8.89114e-10		HEBP2	3.16146e-08	-1.20626	0.923	0.998	0.000441466
CEBPD	7.29309e-18	0.292417	0.887	0.86	1.01841e-13									C9orf16	6.72265e-39	0.265693	1	0.975	9.38751e-35		EMC9	2.28315e-29	0.274036	0.73	0.47	3.18819e-25		ZNF593	8.89713e-14	0.406904	1	0.956	1.24239e-09		HSP90AA1	3.32347e-08	0.874453	1	0.999	0.000464089
KRT16	1.06979e-16	-0.288667	0.972	0.986	1.49386e-12									HSPA8	1.30624e-38	-0.503585	0.954	0.977	1.82403e-34		HIST1H4C	2.46622e-29	-0.88778	0.777	0.912	3.44383e-25		ISG20	1.43559e-13	0.500274	0.724	0.456	2.00466e-09		CCT4	3.79243e-08	0.936297	1	0.908	0.000529576
LGALS1	9.63344e-16	0.339277	0.978	0.975	1.34521e-11									THRAP3	1.34792e-38	-0.326931	0.737	0.826	1.88223e-34		SPC25	4.81159e-29	0.284393	0.548	0.271	6.7189e-25		EIF3D	1.44355e-13	0.36062	0.977	0.912	2.01577e-09		TPR	4.24279e-08	0.771345	1	0.917	0.000592464
CRABP2	1.90352e-14	-0.256174	0.887	0.936	2.65808e-10									EIF4EBP1	1.55669e-38	0.254106	1	0.986	2.17376e-34		LBR	1.45256e-28	0.259081	0.592	0.319	2.02836e-24		CAP1	1.92411e-13	0.4233	0.966	0.935	2.68683e-09		ATP5I	4.30633e-08	-1.11598	0.077	0.97	0.000601336
TUBB4B	1.18592e-13	-0.296539	0.794	0.905	1.65602e-09									HNRNPM	2.46602e-38	-0.376553	0.826	0.881	3.44355e-34		PSMD14	3.66261e-28	0.273989	0.927	0.805	5.11447e-24		EIF5	2.00384e-13	0.62917	0.931	0.891	2.79817e-09		HNRNPF	4.44423e-08	1.01277	1	0.948	0.000620592
CTGF	5.1123e-12	0.299471	0.476	0.366	7.13881e-08									NME1	8.43276e-38	-0.294395	0.995	0.985	1.17755e-33		RPL39L	5.10961e-28	0.288411	0.953	0.841	7.13506e-24		UBC	2.08399e-13	0.488555	0.954	0.851	2.91009e-09		OAZ1	4.59064e-08	-0.832029	0.923	1	0.000641038
MT2A	2.73543e-09	-0.255801	0.809	0.875	3.81976e-05									PARK7	3.03579e-37	-0.284646	0.995	0.993	4.23918e-33		RBM42	7.64247e-28	0.27684	0.862	0.682	1.06719e-23		MT1X	2.2279e-13	-0.447763	0.448	0.791	3.11104e-09		GSTP1	4.82318e-08	-0.633213	1	1	0.000673509
H1F0	1.55547e-08	-0.280373	0.92	0.93	0.000217206									MRPL15	3.32018e-37	-0.309558	0.974	0.968	4.63631e-33		GAR1	1.36627e-27	0.282207	0.739	0.489	1.90786e-23		TYMS	2.2493e-13	-0.430327	0.241	0.648	3.14092e-09		RPS6	5.85687e-08	-1.01167	1	1	0.000817853
														ACTG1	7.4192e-37	-0.397353	0.997	0.994	1.03602e-32		HMG20B	1.76428e-27	0.31969	0.845	0.682	2.46364e-23		DHFR	2.44628e-13	-0.331642	0.115	0.537	3.41599e-09		CCT7	5.95148e-08	0.914587	1	0.941	0.000831064
														IER2	8.77295e-37	-0.393205	0.98	0.979	1.22505e-32		SFPQ	3.32387e-27	0.292323	0.918	0.787	4.64145e-23		EFNA1	2.6877e-13	0.520509	0.851	0.68	3.7531e-09		TMA7	6.0351e-08	-0.909392	0.769	0.996	0.000842742
														SRI	1.09031e-36	-0.331685	0.949	0.958	1.52252e-32		HELLS	3.37035e-27	-0.310641	0.296	0.583	4.70635e-23		C9orf16	2.81911e-13	-0.363703	0.897	0.984	3.93661e-09		S100A6	6.10123e-08	-1.05624	1	0.999	0.000851976
														PDIA3	1.24285e-36	-0.400939	0.783	0.837	1.73551e-32		DDX21	1.23425e-26	0.297432	0.903	0.769	1.72351e-22		NSUN5	3.55963e-13	0.400413	0.759	0.5	4.97066e-09		RPL10A	6.30381e-08	-0.761268	1	1	0.000880264
														NDUFS5	1.94058e-36	-0.256199	1	0.997	2.70982e-32		MARCKS	1.97064e-26	0.306934	0.883	0.734	2.75181e-22		PUF60	4.93627e-13	0.412175	0.966	0.955	6.89301e-09		PHGDH	6.3382e-08	1.00609	1	0.997	0.000885066
														EIF6	3.13735e-36	-0.358457	0.941	0.931	4.381e-32		CKAP5	2.17129e-26	0.256255	0.598	0.345	3.03199e-22		SGOL1	5.22315e-13	-0.344361	0.023	0.429	7.2936e-09		PRKDC	7.39726e-08	1.02693	1	0.978	0.00103295
														DNAJA1	4.56464e-36	-0.403583	0.857	0.879	6.37407e-32		MT-CO2	2.615e-26	-0.253159	0.991	0.999	3.65158e-22		LSM3	5.28982e-13	-0.375418	0.816	0.953	7.38671e-09		PKN1	8.59493e-08	-1.02007	0.154	0.94	0.0012002
														ATP5J2	2.83785e-35	-0.275403	0.997	0.985	3.96277e-31		MSH6	9.00803e-26	-0.303426	0.328	0.621	1.25788e-21		ASF1B	5.36041e-13	-0.414345	0.253	0.673	7.48527e-09		MIF	8.60613e-08	-0.940204	0.615	0.992	0.00120176
														TUBB4B	4.51212e-35	-0.44961	0.88	0.869	6.30073e-31		ISOC2	9.01704e-26	0.282063	0.938	0.856	1.25914e-21		SORBS2	5.63412e-13	-0.471766	0.494	0.798	7.86748e-09		GNB2L1	9.50684e-08	-0.581943	1	1	0.00132753
														NCL	4.85707e-35	-0.359032	0.969	0.965	6.78242e-31		ACTG1	1.21425e-25	0.311667	0.997	0.994	1.69558e-21		CEP55	5.88454e-13	-0.336372	0.023	0.429	8.21717e-09		GUK1	1.00175e-07	-0.91186	0.769	0.997	0.00139884
														HNRNPA3	5.03817e-35	-0.337205	0.982	0.967	7.0353e-31		HSP90B1	1.37501e-25	0.336612	0.891	0.707	1.92006e-21		CCDC34	6.48078e-13	-0.415454	0.552	0.802	9.04977e-09		XRCC6	1.05298e-07	1.11902	1	0.797	0.00147038
														AZGP1	7.07317e-35	-0.487765	0.959	0.957	9.87698e-31		AIMP2	2.68191e-25	0.290271	0.93	0.801	3.74502e-21		CCDC85B	6.734e-13	-0.389781	0.897	0.978	9.40336e-09		MCM7	1.11125e-07	1.40502	0.923	0.69	0.00155175
														LDHB	7.66217e-35	-0.31578	0.997	0.996	1.06994e-30		CALR	3.66421e-25	0.26198	0.991	0.973	5.1167e-21		CBR3	8.09573e-13	-0.370276	0.333	0.721	1.13049e-08		LGALS3BP	1.15078e-07	1.16634	0.923	0.628	0.00160695
														CD59	8.2226e-35	-0.378821	0.916	0.94	1.1482e-30		PSMA4	1.06334e-24	0.2711	0.997	0.976	1.48485e-20		NUF2	8.82938e-13	-0.496579	0.092	0.505	1.23294e-08		NACA	1.31698e-07	-0.935343	0.692	0.999	0.00183903
														ATP5C1	9.65973e-35	-0.308009	0.967	0.974	1.34889e-30		EIF4G2	1.47936e-24	0.283088	0.947	0.866	2.06578e-20		CARS	9.61049e-13	0.364581	0.506	0.226	1.34201e-08		FAM96B	1.39658e-07	-0.924528	0.154	0.941	0.00195018
														PSMD13	1.20583e-34	-0.345034	0.739	0.821	1.68382e-30		PRDX1	2.7564e-24	0.28703	1	1	3.84903e-20		OST4	1.09236e-12	-0.296964	0.977	0.996	1.52537e-08		HSPA2	1.46527e-07	1.33692	1	0.741	0.0020461
														HSPA9	1.77515e-34	-0.355793	0.78	0.828	2.47882e-30		HIST1H2BK	3.2973e-24	-0.385871	0.507	0.76	4.60435e-20		STX10	1.10584e-12	-0.35867	0.632	0.916	1.54419e-08		SNRPD2	1.48786e-07	-0.80313	0.769	0.997	0.00207765
														CITED4	2.26646e-34	0.277002	1	0.982	3.16488e-30		ENO1	3.61578e-24	0.297524	1	0.998	5.04907e-20		SOX4	1.2278e-12	-0.533222	0.69	0.929	1.7145e-08		HSPD1	1.56452e-07	0.911571	1	0.993	0.0021847
														SRSF3	4.2766e-34	-0.294461	0.992	0.985	5.97184e-30		SH3BGRL3	6.90394e-24	-0.277425	0.997	0.996	9.64066e-20		RPS29	1.53168e-12	-0.250984	1	0.999	2.13883e-08		SNRPF	1.60103e-07	-1.01744	0.154	0.968	0.00223567
														CYCS	4.8485e-34	-0.303825	0.995	0.995	6.77045e-30		HSPA5	8.16475e-24	0.401672	0.777	0.57	1.14013e-19		RSL1D1	1.56528e-12	0.446886	0.966	0.965	2.18575e-08		NCL	1.68356e-07	0.816095	1	0.965	0.00235092
														TECR	4.99749e-34	-0.292989	0.997	0.996	6.97849e-30		MRPL13	2.41124e-23	0.250415	0.979	0.914	3.36705e-19		PBDC1	1.70332e-12	0.347436	0.747	0.514	2.37851e-08		PPIA	1.83257e-07	-0.666517	1	1	0.002559
														RSL1D1	7.28476e-34	-0.338617	0.98	0.961	1.01724e-29		SET	6.92091e-23	0.250933	1	0.995	9.66436e-19		SAT2	1.8597e-12	0.362769	0.724	0.479	2.59688e-08		PFDN5	1.83497e-07	-0.997097	0.385	0.996	0.00256235
														MCTS1	8.16911e-34	-0.336188	0.67	0.785	1.14073e-29		DNAJA1	7.49907e-23	0.33001	0.938	0.861	1.04717e-18		TUBB	1.88553e-12	-0.370399	0.966	0.997	2.63296e-08		ATP5L	1.85188e-07	-0.93779	0.385	0.991	0.00258597
														FARSA	1.65338e-33	-0.355921	0.898	0.907	2.30878e-29		HNRNPA3	9.42395e-23	0.260194	0.988	0.966	1.31596e-18		AIMP2	1.90187e-12	0.387125	0.92	0.819	2.65577e-08		PGK1	1.94251e-07	1.15105	1	0.93	0.00271252
														DAD1	2.24229e-33	-0.30964	0.944	0.929	3.13114e-29		NUP35	1.00183e-22	0.271773	0.639	0.406	1.39895e-18		TMA7	2.01302e-12	-0.3208	0.954	0.996	2.81099e-08		FARSA	1.95389e-07	0.756119	1	0.904	0.00272842
														TUBA1A	5.9643e-33	-0.468841	0.923	0.921	8.32854e-29		RTN4	1.00914e-22	0.260596	0.968	0.931	1.40916e-18		PKP3	2.24319e-12	0.428401	0.897	0.808	3.13239e-08		RPS9	2.16163e-07	-0.496892	1	1	0.00301851
														ADRM1	9.92348e-33	-0.273983	0.995	0.987	1.38571e-28		DTYMK	1.37029e-22	0.265493	0.824	0.67	1.91347e-18		LSM5	2.46613e-12	-0.343348	0.92	0.979	3.4437e-08		TMEM161A	2.23791e-07	0.832341	0.769	0.307	0.00312502
														AIMP2	1.09428e-32	-0.339412	0.78	0.834	1.52805e-28		RSL1D1	1.53911e-22	0.258872	0.979	0.962	2.14922e-18		H3F3A	2.4993e-12	-0.262608	0.989	0.999	3.49002e-08		USMG5	2.66226e-07	-0.98818	0.308	0.986	0.00371758
														E2F1	1.19555e-32	0.252537	0.836	0.466	1.66947e-28		MORF4L2	2.54978e-22	0.27455	0.965	0.946	3.56052e-18		RNF114	2.59887e-12	0.433405	0.782	0.585	3.62906e-08		PRRC2C	2.71818e-07	0.689379	1	0.984	0.00379567
														CAP1	3.10453e-32	-0.347052	0.918	0.941	4.33516e-28		THOC6	2.55473e-22	0.267744	0.877	0.748	3.56742e-18		STRA13	2.7351e-12	-0.417025	0.713	0.903	3.8193e-08		CALR	2.84026e-07	0.806776	1	0.976	0.00396614
														PDIA6	3.4242e-32	-0.347683	0.957	0.949	4.78155e-28		HSPH1	2.77946e-22	0.29179	0.818	0.687	3.88124e-18		TECR	2.91142e-12	-0.337037	0.977	0.997	4.06551e-08		EIF5B	3.07509e-07	1.08096	1	0.936	0.00429405
														CCT7	3.77387e-32	-0.356913	0.931	0.944	5.26984e-28		2021-09-07	3.53574e-22	0.262931	0.994	0.963	4.93731e-18		KRTAP2-3	3.3077e-12	0.4502	0.253	0.063	4.61887e-08		PTPLAD1	3.17212e-07	0.926494	0.923	0.662	0.00442955
														ECH1	4.36653e-32	-0.315667	0.808	0.858	6.09742e-28		LDHA	3.91112e-22	0.312121	0.997	0.993	5.46149e-18		AUP1	3.4441e-12	0.33715	0.92	0.882	4.80935e-08		FASTKD2	3.24522e-07	0.624039	0.538	0.126	0.00453163
														TUBB	4.46412e-32	-0.308873	1	0.995	6.2337e-28		NOP58	5.78139e-22	0.262969	0.853	0.731	8.07314e-18		HNRNPA1	3.70622e-12	-0.321289	0.989	0.998	5.17537e-08		HSBP1	3.58175e-07	-0.91948	0.231	0.974	0.00500156
														CCT8	4.86557e-32	-0.34441	0.89	0.904	6.79429e-28		CBX1	7.86721e-22	0.263478	0.845	0.692	1.09858e-17		CENPN	4.65423e-12	-0.320585	0.161	0.554	6.49917e-08		TRMT10C	3.93255e-07	0.838232	0.923	0.638	0.00549142
														RBM42	6.04585e-32	-0.32499	0.621	0.735	8.44242e-28		PLP2	9.20331e-22	0.270519	0.977	0.944	1.28515e-17		NUSAP1	5.97189e-12	-0.493584	0.161	0.547	8.33915e-08		S100A11	4.05239e-07	-0.891054	0.923	0.999	0.00565875
														KRT19	7.09152e-32	-0.401814	1	0.997	9.90259e-28		TXNDC12	1.21198e-21	0.256591	0.674	0.465	1.6924e-17		TMEM54	5.9792e-12	-0.351406	0.448	0.808	8.34936e-08		MRPL14	4.31122e-07	-0.883013	0.308	0.967	0.00602019
														SNRPC	1.24251e-31	-0.312969	0.829	0.854	1.73504e-27		CDT1	1.28784e-21	-0.256993	0.235	0.508	1.79834e-17		HIST1H2AC	6.17118e-12	0.374012	0.356	0.121	8.61743e-08		PDCD5	4.57463e-07	-0.861349	0.615	0.988	0.00638802
														TM4SF1	1.50588e-31	-0.390577	0.997	0.993	2.10281e-27		CCT6A	1.44166e-21	0.261011	0.982	0.984	2.01314e-17		ANAPC15	6.64572e-12	-0.332702	0.448	0.756	9.28008e-08		DUSP23	5.20013e-07	-0.825254	0.077	0.884	0.00726146
														SF3B4	9.64496e-31	-0.304466	0.67	0.776	1.34682e-26		NOP16	3.18812e-21	0.250449	0.88	0.753	4.45189e-17		PFN2	6.67774e-12	-0.359038	0.517	0.842	9.3248e-08		SMC3	5.26846e-07	0.819559	1	0.836	0.00735688
														SLC3A2	1.58007e-30	-0.42093	0.56	0.698	2.20641e-26		C19orf48	7.71682e-21	-0.261285	0.739	0.896	1.07758e-16		LSM4	6.74714e-12	-0.340468	0.931	0.991	9.4217e-08		RPL11	5.28103e-07	-0.470517	1	0.999	0.00737444
														HIST1H4C	2.2673e-30	0.388695	0.99	0.864	3.16606e-26		MALAT1	2.36965e-20	-0.383039	0.997	1	3.30897e-16		PARP1	9.37906e-12	-0.365247	0.874	0.981	1.30969e-07		RPS7	5.29443e-07	-0.558367	1	1	0.00739315
														HNRNPF	2.78225e-30	-0.311281	0.964	0.944	3.88514e-26		ATAD2	3.27051e-20	-0.397769	0.607	0.719	4.56694e-16		GARS	9.57844e-12	0.401515	0.851	0.704	1.33753e-07		NDUFA4	5.61185e-07	-0.682883	1	1	0.00783639
														VCP	3.23351e-30	-0.387904	0.637	0.726	4.51528e-26		DBF4	7.13987e-20	0.308401	0.839	0.731	9.97011e-16		HBS1L	1.07536e-11	0.374366	0.92	0.819	1.50164e-07		LAMTOR2	5.66784e-07	-0.876643	0.308	0.98	0.00791458
														EIF3D	4.71399e-30	-0.298748	0.91	0.916	6.58261e-26		WDR43	7.2349e-20	0.250693	0.845	0.701	1.01028e-15		RPA3	1.14438e-11	-0.390855	0.69	0.903	1.59801e-07		LOXL1	5.96131e-07	0.740896	0.846	0.45	0.00832437
														EPRS	8.6058e-30	-0.333405	0.818	0.868	1.20171e-25		CDC25B	1.10562e-19	0.251568	0.61	0.407	1.54389e-15		GADD45GIP1	1.15579e-11	0.329723	1	1	1.61395e-07		UQCR10	5.96884e-07	-0.869324	0.231	0.956	0.00833488
														TMEM160	1.38198e-29	0.250021	0.997	0.927	1.9298e-25		KIF22	1.10907e-19	0.25523	0.765	0.618	1.54871e-15		PRELP	1.40455e-11	-0.291268	0.011	0.379	1.96131e-07		SUMO2	6.16119e-07	-0.847556	0.462	0.992	0.00860349
														TACSTD2	1.48916e-29	-0.390399	0.964	0.965	2.07946e-25		JUNB	1.77111e-19	-0.313822	0.833	0.947	2.47318e-15		CCT4	1.41791e-11	0.387194	0.989	0.905	1.97997e-07		RDH11	6.26641e-07	0.8115	0.769	0.33	0.00875042
														TMBIM6	1.88829e-29	-0.346276	0.775	0.83	2.63681e-25		USP14	1.94691e-19	0.269203	0.906	0.811	2.71867e-15		IMPA2	1.65085e-11	-0.409847	0.609	0.847	2.30524e-07		EIF4EBP1	6.41455e-07	-0.869248	0.769	0.99	0.00895728
														COPE	2.87327e-29	-0.259621	0.992	0.976	4.01224e-25		RPL7L1	2.66536e-19	0.263699	0.848	0.734	3.72191e-15		MZT2A	1.95299e-11	-0.340233	0.851	0.968	2.72716e-07		TIMM8B	6.50525e-07	-0.719634	0	0.796	0.00908394
														NAPRT1	4.61263e-29	-0.29972	0.954	0.95	6.44108e-25		NCL	2.94748e-19	0.253881	0.982	0.962	4.11586e-15		LAMP2	2.02227e-11	0.426603	0.667	0.392	2.8239e-07		MYC	6.58548e-07	0.746412	1	0.978	0.00919597
														PPT1	4.93252e-29	-0.318762	0.742	0.78	6.88778e-25		SAP30	8.13665e-19	0.282666	0.71	0.547	1.1362e-14		RNASEH2A	2.59671e-11	-0.435169	0.747	0.921	3.62604e-07		XRCC5	7.00364e-07	0.820731	1	0.874	0.00977988
														PSMC1	6.83764e-29	-0.329111	0.801	0.839	9.54808e-25		CLSPN	8.53136e-19	-0.303556	0.328	0.544	1.19132e-14		AKAP8L	2.76461e-11	0.393193	0.816	0.651	3.8605e-07		NOL8	7.09957e-07	0.869735	0.846	0.496	0.00991385
														EIF4A3	6.90283e-29	-0.32717	0.514	0.661	9.63911e-25		H1F0	9.48963e-19	-0.302862	0.85	0.943	1.32513e-14		ZWINT	2.79914e-11	-0.328487	0.115	0.48	3.90872e-07		FH	7.49776e-07	0.921758	0.923	0.662	0.0104699
														PCMT1	7.05244e-29	-0.313963	0.639	0.742	9.84802e-25		UBE2C	1.31197e-18	0.853892	0.871	0.744	1.83203e-14		AURKB	2.98359e-11	-0.372835	0.057	0.428	4.16629e-07		G3BP1	7.52898e-07	0.933123	0.923	0.77	0.0105135
														HSP90B1	1.47052e-28	-0.422983	0.675	0.755	2.05343e-24		KLHL23	1.35518e-18	-0.268576	0.648	0.796	1.89238e-14		FH	4.04729e-11	0.483428	0.816	0.657	5.65164e-07		UBE2M	7.56655e-07	-0.893296	0.385	0.971	0.0105659
														PPIB	2.67349e-28	-0.293346	0.987	0.978	3.73326e-24		CCT5	5.41551e-18	0.269145	0.933	0.849	7.56222e-14		SQSTM1	4.30917e-11	0.571239	0.977	0.885	6.01733e-07		ATP5J	7.79074e-07	-0.761035	0.615	0.995	0.010879
														PSMC2	3.0603e-28	-0.319585	0.645	0.761	4.27341e-24		NEAT1	1.1236e-17	-0.319494	0.874	0.956	1.569e-13		NUDC	4.35406e-11	0.352272	0.931	0.883	6.08001e-07		DYNC1I2	8.02151e-07	0.904893	0.923	0.85	0.0112012
														PMF1	5.80283e-28	-0.297537	0.872	0.878	8.10307e-24		CARHSP1	4.82195e-17	-0.267772	0.836	0.914	6.73336e-13		BCL2L12	4.45381e-11	-0.353913	0.667	0.875	6.2193e-07		TMEM179B	8.45851e-07	-0.800295	0.154	0.958	0.0118115
														NT5DC2	6.05019e-28	0.252059	0.992	0.882	8.44849e-24		PCSK1N	2.53939e-16	-0.25292	0.856	0.922	3.546e-12		TOP2A	4.71132e-11	-0.446189	0.069	0.429	6.57889e-07		HIST1H4C	8.53447e-07	-1.98483	0.231	0.893	0.0119175
														CCT6A	9.90652e-28	-0.284049	0.997	0.98	1.38335e-23		F12	3.69694e-16	0.253151	0.903	0.822	5.1624e-12		DNTTIP1	5.27851e-11	0.388003	0.747	0.584	7.37092e-07		GAPDH	8.89118e-07	-0.600571	1	1	0.0124156
														PPA1	1.20405e-27	-0.281057	0.985	0.968	1.68133e-23		ID4	5.58106e-16	-0.27281	0.839	0.933	7.79339e-12		MRPL21	5.29005e-11	0.336476	0.966	0.962	7.38703e-07		BZW2	9.72116e-07	0.75705	1	0.805	0.0135746
														HSPA2	1.34803e-27	-0.39008	0.683	0.758	1.88239e-23		RARRES1	3.11719e-15	-0.384651	0.865	0.904	4.35284e-11		CKS2	5.29652e-11	-0.648671	0.931	0.948	7.39605e-07		GADD45GIP1	1.09478e-06	-0.666697	1	1	0.0152875
														NOSIP	1.82155e-27	-0.290029	0.91	0.909	2.54362e-23		HSPA8	1.55051e-14	0.28764	0.985	0.969	2.16514e-10		SSBP1	5.58935e-11	0.331174	0.966	0.979	7.80497e-07		S100A4	1.14956e-06	-0.977841	0.385	0.97	0.0160524
														UBC	2.72584e-27	-0.41931	0.836	0.861	3.80636e-23		OBP2B	2.25766e-14	0.264303	0.93	0.87	3.1526e-10		UBE2T	6.01747e-11	-0.412861	0.575	0.821	8.40279e-07		SNRPG	1.32457e-06	-0.719503	0.692	0.995	0.0184963
														POLR2G	6.46642e-27	-0.297118	0.801	0.827	9.02972e-23		CEBPD	2.45791e-14	-0.26993	0.768	0.889	3.43223e-10		COX17	6.25117e-11	-0.32749	0.805	0.929	8.72914e-07		RPL22	1.36574e-06	-0.781623	0.923	0.999	0.0190712
														WBSCR22	8.81802e-27	-0.288196	0.872	0.901	1.23135e-22		BUB3	2.71085e-13	0.259951	0.795	0.761	3.78543e-09		DDX27	6.36715e-11	0.34349	0.816	0.583	8.89109e-07		METRN	1.36814e-06	-0.907971	0.308	0.94	0.0191047
														ANXA7	1.068e-26	-0.286554	0.578	0.694	1.49136e-22		MANF	9.19768e-13	0.259023	0.88	0.781	1.28436e-08		CRIP1	7.22809e-11	-0.376147	0.391	0.709	1.00933e-06		PSMD3	1.37227e-06	0.825656	0.923	0.728	0.0191624
														GORASP2	1.29028e-26	-0.281407	0.974	0.946	1.80174e-22		CDK1	8.4668e-12	0.334453	0.499	0.365	1.1823e-07		STIP1	7.35468e-11	0.352499	0.897	0.742	1.02701e-06		HSPE1	1.38593e-06	-0.718274	0.923	0.998	0.0193531
														SPCS2	1.64292e-26	-0.313328	0.877	0.875	2.29417e-22		HIST1H1C	1.45707e-11	-0.254678	0.381	0.568	2.03466e-07		BCL7C	8.07452e-11	-0.359797	0.621	0.863	1.12753e-06		DDB1	1.46961e-06	0.885609	0.846	0.494	0.0205216
														ARF4	1.71028e-26	-0.324006	0.744	0.824	2.38824e-22		VIM	1.0086e-09	0.308296	0.677	0.565	1.40841e-05		NTRK2	8.82328e-11	-0.317898	0.149	0.542	1.23208e-06		MCOLN3	1.49829e-06	0.445787	0.308	0.043	0.0209221
														SCP2	1.88464e-26	-0.285994	0.752	0.798	2.63171e-22		CTGF	1.62683e-09	-0.253116	0.261	0.428	2.27171e-05		SRD5A3	8.95471e-11	-0.308814	0.218	0.594	1.25044e-06		SELM	1.51643e-06	-0.840488	0.154	0.936	0.0211754
														GNL3	1.89899e-26	-0.295423	0.905	0.885	2.65174e-22		MT2A	9.22092e-08	0.260254	0.897	0.846	0.00128761		EIF3E	9.17252e-11	0.28897	1	0.996	1.28085e-06		HSP90B1	1.58162e-06	1.17237	0.923	0.738	0.0220857
														TIMM17A	1.96225e-26	-0.272573	0.824	0.853	2.74008e-22									NOSIP	1.06062e-10	0.403468	0.943	0.907	1.48105e-06		RPL14	1.5907e-06	-0.519527	1	0.999	0.0222126
														U2AF1	2.13541e-26	-0.262999	0.987	0.978	2.98189e-22									MED10	1.08063e-10	0.312723	0.701	0.441	1.50899e-06		PHF14	1.60911e-06	0.735875	1	0.962	0.0224696
														TMEM59	3.42483e-26	-0.288442	0.939	0.929	4.78243e-22									CAPN2	1.099e-10	0.335732	0.805	0.646	1.53465e-06		NDUFS2	1.61464e-06	0.866295	0.923	0.917	0.0225468
														MYBL2	4.08388e-26	0.251283	0.923	0.678	5.70273e-22									POLR2G	1.17969e-10	0.394172	0.908	0.818	1.64732e-06		CSTB	1.69442e-06	-0.835726	0.615	0.996	0.0236609
														C1QBP	5.05317e-26	-0.268131	0.985	0.98	7.05625e-22									AKIRIN2	1.27647e-10	0.394666	0.874	0.692	1.78247e-06		LTF	1.73908e-06	2.2572	0.846	0.592	0.0242846
														TALDO1	6.06567e-26	-0.2832	0.987	0.986	8.4701e-22									CEBPB	1.52538e-10	0.409774	0.943	0.9	2.13004e-06		BSG	2.16236e-06	0.627306	1	0.983	0.0301952
														NDUFB6	8.93587e-26	-0.289042	0.862	0.878	1.24781e-21									CDKN3	1.53463e-10	-0.557503	0.494	0.758	2.14296e-06		POMP	2.20975e-06	-0.697466	1	0.997	0.030857
														CTPS1	9.15484e-26	-0.277862	0.962	0.946	1.27838e-21									FADS2	1.53796e-10	-0.290672	0.207	0.567	2.14761e-06		NME4	2.33219e-06	-0.762446	0.692	0.986	0.0325667
														SSR2	2.14138e-25	-0.2556	0.99	0.986	2.99022e-21									C8orf33	1.56522e-10	0.365677	0.931	0.829	2.18567e-06		AKAP9	2.55758e-06	0.858606	0.923	0.749	0.035714
														HNRNPU	5.52205e-25	-0.310334	0.87	0.886	7.71099e-21									RRP9	2.07382e-10	0.363086	0.736	0.5	2.89588e-06		COX17	2.5686e-06	-0.787215	0.231	0.928	0.0358679
														MRPL22	1.13441e-24	-0.260619	0.765	0.8	1.58409e-20									RBM42	2.09791e-10	0.402955	0.828	0.708	2.92952e-06		APRT	2.57564e-06	-0.573447	1	0.997	0.0359663
														ACTB	1.17688e-24	-0.25698	1	1	1.6434e-20									CDCA3	2.20488e-10	-0.354025	0.046	0.39	3.07889e-06		SLTM	2.5964e-06	0.807304	0.923	0.805	0.0362562
														NIT2	4.18831e-24	-0.277261	0.875	0.888	5.84855e-20									EIF2S1	2.3184e-10	0.360598	0.851	0.683	3.23741e-06		HOMER3	2.63475e-06	-0.761836	0.077	0.846	0.0367917
														MGST1	4.61927e-24	-0.250416	1	0.998	6.45034e-20									CCT7	2.322e-10	0.346127	0.977	0.94	3.24244e-06		RPS10	2.73958e-06	-0.790023	0.308	0.976	0.0382554
														RAB11A	5.19925e-24	-0.269035	0.696	0.745	7.26023e-20									TTC3	2.39285e-10	-0.297145	0.897	0.981	3.34138e-06		APEX1	2.74061e-06	0.760541	1	0.872	0.0382699
														ANP32A	5.55118e-24	-0.270036	0.841	0.83	7.75166e-20									PSMD8	2.53273e-10	0.313351	1	0.987	3.53671e-06		SERPINH1	2.9087e-06	1.10752	0.846	0.553	0.0406171
														SF3B1	8.21832e-24	-0.272668	0.471	0.623	1.14761e-19									SCAND1	2.71699e-10	0.297813	1	0.953	3.79401e-06		SF3B2	2.93394e-06	1.03776	0.923	0.871	0.0409695
														HBS1L	1.15561e-23	-0.282184	0.793	0.83	1.61369e-19									DKC1	2.73108e-10	0.346204	0.897	0.779	3.81368e-06		YBX3	2.95686e-06	-0.803053	0.538	0.991	0.0412896
														PDHA1	1.47098e-23	-0.275324	0.634	0.721	2.05408e-19									TIMM44	2.80222e-10	0.326771	0.816	0.598	3.91302e-06		CISD3	2.99735e-06	-0.765649	0.154	0.876	0.0418549
														CLDN4	1.56065e-23	-0.337218	0.972	0.963	2.17929e-19									TPX2	3.55501e-10	-0.438005	0.172	0.513	4.96422e-06		DHX9	3.13126e-06	1.07929	0.846	0.543	0.0437249
														FH	3.26488e-23	-0.291894	0.583	0.684	4.55908e-19									HMOX2	3.8826e-10	0.326836	0.885	0.748	5.42166e-06		CD44	3.28029e-06	0.788764	0.923	0.768	0.045806
														MIR4435-1HG	3.45933e-23	0.256887	0.995	0.912	4.83061e-19									PET112	4.03917e-10	-0.346277	0.218	0.558	5.6403e-06		CTPS1	3.34718e-06	1.01206	0.923	0.949	0.04674
														ATP5A1	3.82492e-23	-0.263359	0.939	0.933	5.34112e-19									ASPM	4.43405e-10	-0.362635	0.08	0.408	6.19171e-06		HNRNPA2B1	3.36012e-06	0.607622	1	0.993	0.0469207
														2021-09-07	4.27047e-23	-0.256812	0.972	0.967	5.96329e-19									RBM8A	5.00042e-10	0.296075	1	0.995	6.98258e-06		S100A1	3.42415e-06	-0.783213	0.769	0.993	0.0478149
														HSPA5	5.74237e-23	-0.467083	0.504	0.631	8.01865e-19									PBX1	5.07047e-10	-0.3024	0.161	0.502	7.08041e-06		POLR1D	3.48118e-06	-0.656168	0.923	0.997	0.0486111
														APEX1	1.1632e-22	-0.273298	0.87	0.873	1.62429e-18									BRIX1	5.43817e-10	0.343652	0.851	0.637	7.59386e-06		ANXA2	3.48118e-06	0.712608	1	1	0.0486112
														RNF181	2.24199e-22	-0.265738	0.749	0.79	3.13072e-18									KHDRBS3	5.81747e-10	0.394731	0.897	0.849	8.12351e-06		PDIA6	3.49286e-06	0.83282	0.923	0.951	0.0487743
														DKC1	2.40337e-22	-0.279272	0.775	0.786	3.35607e-18									FBXO32	6.02398e-10	1.04587	0.678	0.449	8.41189e-06		THRAP3	3.52628e-06	0.787639	0.923	0.808	0.049241
														DPM1	2.41776e-22	-0.272784	0.514	0.621	3.37616e-18									PEBP1	6.08244e-10	-0.271671	0.954	0.994	8.49352e-06
														UBE2S	3.24451e-22	0.272008	1	0.961	4.53064e-18									PQBP1	6.53947e-10	0.345876	0.885	0.849	9.13172e-06
														DDX39A	3.80769e-22	-0.329803	0.941	0.931	5.31706e-18									SPCS2	6.83722e-10	0.297285	0.943	0.872	9.54749e-06
														NAA20	3.81243e-22	-0.262115	0.757	0.787	5.32368e-18									ANLN	7.37098e-10	-0.302228	0.092	0.429	1.02928e-05
														RAB7A	7.47852e-22	-0.253216	0.872	0.867	1.0443e-17									PAFAH1B3	7.44118e-10	-0.276971	0.954	0.992	1.03909e-05
														TUBB6	7.838e-22	-0.292721	0.88	0.873	1.0945e-17									GORASP2	8.72047e-10	0.374317	0.943	0.952	1.21773e-05
														STIP1	8.49077e-22	-0.280167	0.714	0.757	1.18565e-17									NIFK	9.30121e-10	0.383689	0.874	0.718	1.29882e-05
														PSMD11	9.16828e-22	-0.265485	0.903	0.892	1.28026e-17									VPS28	9.5931e-10	0.310952	0.966	0.94	1.33958e-05
														SF3B2	9.96804e-22	-0.30948	0.87	0.871	1.39194e-17									SDCBP	1.086e-09	0.369648	0.609	0.372	1.5165e-05
														SFN	1.28671e-21	-0.314068	0.839	0.851	1.79676e-17									CCNB2	1.12448e-09	-0.412796	0.092	0.432	1.57023e-05
														TMCO1	1.62931e-21	-0.257608	0.923	0.917	2.27517e-17									BEX2	1.12634e-09	0.33336	0.506	0.268	1.57282e-05
														TKT	1.7947e-21	-0.260255	0.997	0.976	2.50612e-17									DNAJA1	1.24473e-09	0.3709	0.966	0.87	1.73814e-05
														RAB8A	1.98687e-21	-0.252749	0.716	0.759	2.77446e-17									WDR34	1.25343e-09	-0.338076	0.851	0.934	1.75029e-05
														ANXA5	8.02792e-21	-0.252767	0.517	0.621	1.12102e-16									WDR83OS	1.25774e-09	0.261612	1	0.996	1.75631e-05
														EBNA1BP2	9.495e-21	-0.255454	1	0.995	1.32588e-16									CLSPN	1.26772e-09	-0.33933	0.184	0.521	1.77024e-05
														EIF2S1	1.47185e-20	-0.262527	0.629	0.705	2.0553e-16									UTP11L	1.29775e-09	0.286763	0.69	0.468	1.81218e-05
														PPIH	1.94483e-20	-0.26505	0.854	0.839	2.71576e-16									DRAP1	1.32215e-09	0.287044	0.966	0.977	1.84625e-05
														BCLAF1	2.15079e-20	-0.251775	0.849	0.873	3.00337e-16									APOE	1.34492e-09	-0.543148	0.31	0.653	1.87804e-05
														FKBP4	2.25578e-20	-0.26191	0.867	0.865	3.14997e-16									TRMT1	1.36629e-09	0.345496	0.816	0.677	1.90788e-05
														HSPB1	4.26539e-20	-0.352946	0.997	0.994	5.95618e-16									YARS	1.47624e-09	0.283811	0.54	0.298	2.06142e-05
														GSTM3	5.31709e-20	-0.264928	0.811	0.823	7.42478e-16									CENPA	1.54133e-09	-0.411779	0.08	0.401	2.15231e-05
														LGALS3BP	7.82453e-20	-0.279311	0.573	0.645	1.09262e-15									HIST2H2AC	1.63232e-09	-0.310361	0.08	0.41	2.27938e-05
														GTPBP4	7.97006e-20	-0.26905	0.765	0.786	1.11294e-15									CENPM	1.66084e-09	-0.27495	0.149	0.466	2.31919e-05
														IGSF23	1.00388e-19	0.275038	0.834	0.585	1.40182e-15									AATF	1.71164e-09	0.27734	0.701	0.471	2.39014e-05
														TUBA4A	1.34643e-19	-0.258285	0.573	0.677	1.88016e-15									C11orf58	1.74162e-09	0.293181	1	0.928	2.43199e-05
														CD9	1.41475e-19	-0.285894	0.839	0.866	1.97556e-15									BLOC1S4	1.88807e-09	0.267222	0.667	0.434	2.6365e-05
														NDUFA9	1.42421e-19	-0.255075	0.708	0.749	1.98877e-15									VPS72	1.99749e-09	0.329735	0.885	0.733	2.78929e-05
														CCT2	2.8361e-19	-0.307137	0.926	0.902	3.96033e-15									TMSB15B	2.06847e-09	-0.280096	0.368	0.673	2.88841e-05
														BUB3	3.0545e-19	-0.269313	0.762	0.768	4.26531e-15									SF3B4	2.11063e-09	0.300965	0.92	0.747	2.94728e-05
														CALR	3.84841e-19	-0.254031	0.985	0.974	5.37392e-15									NPC2	2.12025e-09	-0.402857	0.782	0.93	2.96071e-05
														LDHA	5.14947e-19	-0.309003	0.992	0.994	7.19072e-15									PRSS22	2.12177e-09	0.336522	0.598	0.349	2.96283e-05
														APLP2	6.85704e-19	-0.257351	0.537	0.632	9.57517e-15									RGS10	2.35174e-09	-0.287741	0.793	0.931	3.28397e-05
														MALAT1	8.86631e-19	-0.363922	1	0.999	1.23809e-14									E2F1	2.35418e-09	-0.351517	0.218	0.554	3.28737e-05
														OBP2B	1.06917e-18	-0.327292	0.898	0.876	1.49299e-14									SAPCD2	2.513e-09	-0.265659	0.092	0.426	3.50915e-05
														TRAP1	1.25304e-18	-0.269899	0.744	0.762	1.74974e-14									SNHG15	2.67679e-09	0.420209	0.828	0.66	3.73787e-05
														PSMD3	1.28464e-18	-0.260521	0.696	0.738	1.79387e-14									RTCB	3.0871e-09	0.316637	0.644	0.404	4.31083e-05
														NIFK	2.54976e-18	-0.256739	0.703	0.73	3.56048e-14									TMEM11	3.31348e-09	0.344566	0.908	0.834	4.62694e-05
														EID1	2.57147e-18	-0.258545	0.844	0.827	3.59081e-14									SRA1	3.53681e-09	0.329057	0.828	0.679	4.9388e-05
														MORF4L2	6.55721e-18	-0.259633	0.967	0.945	9.15649e-14									TMBIM6	3.63478e-09	0.368069	0.908	0.815	5.07561e-05
														FDPS	1.07822e-17	-0.256613	0.982	0.961	1.50563e-13									BRMS1	3.63506e-09	0.353792	0.77	0.592	5.076e-05
														WDR74	2.51815e-17	-0.25166	0.706	0.727	3.51635e-13									PSMC4	3.70329e-09	0.345143	0.954	0.867	5.17127e-05
														BRIX1	4.99429e-17	-0.251115	0.598	0.658	6.97403e-13									EIF3M	3.90753e-09	0.301257	0.977	0.913	5.45648e-05
														HNRNPH3	5.72439e-17	-0.2511	0.749	0.773	7.99353e-13									PGP	4.02147e-09	-0.309431	0.575	0.815	5.61557e-05
														HLA-A	6.9763e-17	-0.27589	0.522	0.61	9.74171e-13									VBP1	4.02538e-09	0.27259	0.816	0.622	5.62104e-05
														MCM7	2.06735e-15	-0.27904	0.67	0.696	2.88685e-11									PRC1	4.09557e-09	-0.281184	0.069	0.393	5.71905e-05
														JUN	2.90622e-14	-0.288809	0.992	0.979	4.05824e-10									DEK	4.25464e-09	-0.302391	0.954	0.962	5.94117e-05
														TYMP	6.1736e-13	-0.250884	0.877	0.849	8.62082e-09									ZDHHC12	4.41803e-09	-0.294685	0.816	0.946	6.16934e-05
														MMP7	8.32741e-13	-0.505261	0.946	0.912	1.16284e-08									FXR1	4.62292e-09	0.299868	0.77	0.557	6.45545e-05
														ELF3	1.75527e-11	-0.271591	0.908	0.858	2.45106e-07									DPM1	5.0316e-09	0.303827	0.793	0.591	7.02613e-05
														HLA-B	4.68482e-11	-0.308999	0.46	0.536	6.54189e-07									GABRP	5.14846e-09	-0.35121	0.678	0.887	7.18931e-05
														ID3	5.06668e-11	-0.318133	0.997	0.967	7.07512e-07									CCT5	5.43309e-09	0.336994	0.954	0.859	7.58677e-05
														LTF	6.19642e-07	-0.653601	0.606	0.59	0.00865268									AZGP1	5.64335e-09	-0.343356	0.77	0.966	7.88038e-05
																												HMGN3	5.90295e-09	-0.273522	0.678	0.894	8.24288e-05
																												HMMR	5.90372e-09	-0.325556	0.057	0.374	8.24395e-05
																												MRPL22	6.30197e-09	0.295629	0.874	0.789	8.80007e-05
																												AP000688.8	6.35286e-09	-0.318805	0.414	0.715	8.87114e-05
																												PEF1	6.53695e-09	0.264849	0.632	0.399	9.1282e-05
																												EIF3I	6.77814e-09	0.287526	0.966	0.911	9.465e-05
																												EXOSC5	7.14104e-09	0.275581	0.897	0.757	9.97175e-05
																												HSPA9	7.7728e-09	0.33183	0.885	0.815	0.000108539
																												SMIM7	9.12918e-09	0.297886	0.92	0.84	0.00012748
																												SNW1	1.24634e-08	0.303386	0.816	0.635	0.000174039
																												TTYH1	1.51108e-08	-0.342211	0.345	0.623	0.000211008
																												H1F0	1.54041e-08	0.412483	0.943	0.926	0.000215103
																												CCT2	1.55709e-08	0.347163	0.92	0.906	0.000217432
																												PKMYT1	1.63012e-08	-0.256352	0.138	0.457	0.00022763
																												GAMT	1.68713e-08	-0.282713	0.609	0.837	0.000235591
																												EIF4G2	1.69488e-08	0.322236	0.966	0.876	0.000236673
																												CBX1	1.81225e-08	-0.28163	0.494	0.728	0.000253062
																												KRT14	1.88151e-08	-0.350793	0.69	0.896	0.000262734
																												CLDN4	1.89647e-08	0.418088	0.977	0.964	0.000264824
																												NOL7	2.04402e-08	0.321069	0.862	0.798	0.000285427
																												TMEM126B	2.07185e-08	0.310186	0.724	0.546	0.000289313
																												ASRGL1	2.21407e-08	-0.260731	0.299	0.617	0.000309173
																												TPGS2	2.25211e-08	-0.266074	0.448	0.706	0.000314484
																												TWISTNB	2.27158e-08	0.27022	0.736	0.578	0.000317203
																												GTPBP4	2.28128e-08	0.337774	0.862	0.778	0.000318558
																												RARRES1	2.32777e-08	-0.286494	0.632	0.91	0.00032505
																												CDK1	2.43886e-08	-0.34304	0.103	0.401	0.000340563
																												ALDH1A3	2.65894e-08	0.252057	0.414	0.196	0.000371294
																												SKP1	2.75746e-08	0.2675	1	0.989	0.000385052
																												PRPF3	2.94214e-08	0.252586	0.54	0.31	0.00041084
																												CARHSP1	3.05542e-08	-0.314417	0.747	0.908	0.000426659
																												TSC22D1	3.13642e-08	0.418962	0.816	0.706	0.00043797
																												NQO2	3.22022e-08	-0.264763	0.379	0.661	0.000449671
																												CCT6A	3.31494e-08	0.296541	0.977	0.984	0.000462898
																												MRPS10	3.34871e-08	0.308946	0.713	0.532	0.000467614
																												PHLDA2	3.38265e-08	-0.328191	0.966	0.985	0.000472353
																												SLC25A6	3.48027e-08	-0.257061	0.954	0.993	0.000485985
																												DAPK3	3.62795e-08	0.29064	0.621	0.412	0.000506607
																												GGCT	3.63919e-08	-0.285366	0.931	0.967	0.000508176
																												NDC80	4.12225e-08	-0.278844	0.069	0.357	0.000575632
																												MT-ND6	4.2013e-08	-0.266447	0.31	0.66	0.000586669
																												PXMP2	4.22781e-08	-0.258192	0.287	0.603	0.000590372
																												GPN1	4.4371e-08	0.284267	0.575	0.385	0.000619596
																												PFDN4	4.46879e-08	0.29306	0.851	0.707	0.000624022
																												SURF2	4.49431e-08	0.316994	0.92	0.855	0.000627586
																												HIST1H2BK	4.93764e-08	0.535298	0.885	0.709	0.000689491
																												MAP2K3	5.62112e-08	0.269575	0.828	0.628	0.000784934
																												MRPL49	6.06873e-08	0.251285	0.563	0.327	0.000847438
																												CD44	6.43601e-08	0.330442	0.874	0.765	0.000898724
																												SNRPC	6.53949e-08	0.27176	0.931	0.845	0.000913175
																												SBDS	6.6121e-08	0.27185	0.874	0.773	0.000923314
																												RP9	6.8049e-08	0.299674	0.632	0.426	0.000950236
																												PPP1R15A	7.11865e-08	0.425081	0.713	0.585	0.000994049
																												TSSC4	7.4536e-08	0.290225	0.885	0.754	0.00104082
																												S100A6	7.63626e-08	0.509648	0.989	1	0.00106633
																												FXYD3	8.59619e-08	-0.322603	0.851	0.947	0.00120037
																												UBB	8.98471e-08	0.286936	1	0.999	0.00125463
																												MRPL9	9.91882e-08	0.259988	0.966	0.922	0.00138506
																												CCNA2	1.15762e-07	-0.259535	0.08	0.353	0.0016165
																												EIF4A2	1.19189e-07	0.346921	0.931	0.91	0.00166435
																												CTXN1	1.21354e-07	-0.264993	0.402	0.664	0.00169459
																												ZFR	1.25309e-07	0.295901	0.816	0.664	0.00174981
																												PSMB7	1.382e-07	0.255983	0.966	0.993	0.00192982
																												NMU	1.39074e-07	-0.255498	0.057	0.323	0.00194202
																												HM13	1.39409e-07	0.331085	0.897	0.783	0.0019467
																												PCSK1N	1.39848e-07	-0.297411	0.759	0.918	0.00195284
																												UTP14A	1.48078e-07	0.251528	0.655	0.431	0.00206776
																												COPZ1	1.48159e-07	0.25884	0.736	0.579	0.00206889
																												RNF181	1.49317e-07	0.25946	0.874	0.777	0.00208506
																												NUPR1	1.58129e-07	0.773032	0.736	0.664	0.00220812
																												CDT1	1.59147e-07	-0.250037	0.172	0.474	0.00222233
																												HIST1H1A	1.61389e-07	-0.275508	0.023	0.279	0.00225363
																												RPL7L1	1.63874e-07	0.258288	0.885	0.747	0.00228834
																												S100A11	1.6969e-07	0.302892	1	0.999	0.00236955
																												PLIN2	1.87973e-07	0.353373	0.747	0.611	0.00262485
																												TYMP	1.9619e-07	0.391868	0.897	0.853	0.0027396
																												LSMD1	2.05462e-07	-0.26409	0.77	0.919	0.00286906
																												CNN3	2.45968e-07	0.337016	0.897	0.84	0.00343469
																												EDF1	2.57778e-07	0.252844	0.977	0.988	0.00359962
																												PRPF19	2.68932e-07	0.276055	0.839	0.738	0.00375537
																												SLU7	2.85165e-07	0.255626	0.529	0.332	0.00398205
																												NFIX	2.96856e-07	-0.253145	0.678	0.871	0.00414529
																												CCDC86	3.04949e-07	0.321529	0.586	0.415	0.00425831
																												KRT6B	3.14789e-07	0.479249	0.931	0.916	0.00439571
																												ASNA1	3.27393e-07	0.269389	1	0.979	0.00457172
																												TPD52L2	3.56897e-07	0.252038	0.736	0.554	0.00498372
																												COTL1	3.8822e-07	0.290047	0.989	0.959	0.0054211
																												NUDT8	3.98432e-07	-0.251026	0.31	0.637	0.00556371
																												DDX5	4.01139e-07	0.307961	0.908	0.838	0.0056015
																												TIPRL	4.9805e-07	0.268756	0.897	0.792	0.00695476
																												THOC6	5.34972e-07	-0.250655	0.529	0.781	0.00747035
																												RIPK2	5.39891e-07	0.351695	0.54	0.35	0.00753903
																												PEA15	5.52438e-07	0.432112	0.724	0.655	0.00771424
																												CAV1	6.07682e-07	0.418602	0.563	0.397	0.00848567
																												ZFP36L1	6.62523e-07	-0.255183	0.678	0.865	0.00925147
																												PPP2CA	6.83072e-07	0.2529	0.724	0.571	0.00953841
																												NOP58	7.474e-07	0.300116	0.908	0.745	0.0104367
																												RBM22	7.95475e-07	0.250294	0.552	0.342	0.011108
																												STRAP	8.22127e-07	0.266152	0.966	0.91	0.0114802
																												OCIAD2	8.43285e-07	0.286612	0.931	0.941	0.0117756
																												PPCS	9.39526e-07	0.29246	0.92	0.895	0.0131195
																												CCDC58	9.76145e-07	0.307119	0.77	0.643	0.0136309
																												MFGE8	9.99476e-07	-0.255453	0.471	0.739	0.0139567
																												GPATCH4	1.04808e-06	0.428101	0.793	0.795	0.0146354
																												RHBDD2	1.07985e-06	0.267551	0.782	0.597	0.0150791
																												SCAMP2	1.17296e-06	0.261398	0.621	0.417	0.0163792
																												URM1	1.18477e-06	0.262765	0.77	0.622	0.0165441
																												ZFAND1	1.19057e-06	0.334894	0.77	0.707	0.0166251
																												FAM50A	1.22474e-06	0.251165	0.874	0.777	0.0171022
																												GLRX3	1.30458e-06	0.254463	0.908	0.864	0.0182171
																												MRPL47	1.31324e-06	0.276813	0.954	0.906	0.0183381
																												EIF4E	1.37672e-06	0.25827	0.816	0.681	0.0192245
																												DTYMK	1.47719e-06	-0.254605	0.471	0.707	0.0206274
																												DKK1	1.60056e-06	0.547392	0.184	0.062	0.0223502
																												OSER1	1.67428e-06	0.265216	0.759	0.61	0.0233797
																												EMP1	1.73734e-06	0.488478	0.839	0.928	0.0242602
																												TARS	2.01137e-06	0.293847	0.575	0.408	0.0280867
																												FEZ2	2.1485e-06	0.274979	0.701	0.547	0.0300016
																												GRPEL1	2.23996e-06	0.277775	0.713	0.584	0.0312789
																												PPP2R1A	2.58545e-06	0.256665	0.862	0.799	0.0361032
																												CTSC	2.65257e-06	0.724596	0.609	0.433	0.0370405
																												RTN4	2.6882e-06	0.298811	0.931	0.938	0.037538
																												S100A4	2.74695e-06	0.321437	0.977	0.966	0.0383584
																												RND3	2.75809e-06	0.324451	0.851	0.711	0.038514
																												COX19	3.02605e-06	0.308732	0.736	0.593	0.0422558
																												KRT19	3.27917e-06	0.396482	0.977	0.998	0.0457903
																												FEN1	3.2924e-06	-0.28902	0.414	0.649	0.045975

## Sheet: FCIBC02PR clusters
CLUSTER 0							CLUSTER 1							CLUSTER 2							CLUSTER 3							CLUSTER 4							CLUSTER 5							CLUSTER 6							CLUSTER 7
gene	p_val	avg_logFC	pct.1	pct.2	p_val_adj		gene	p_val	avg_logFC	pct.1	pct.2	p_val_adj		gene	p_val	avg_logFC	pct.1	pct.2	p_val_adj		gene	p_val	avg_logFC	pct.1	pct.2	p_val_adj		gene	p_val	avg_logFC	pct.1	pct.2	p_val_adj		gene	p_val	avg_logFC	pct.1	pct.2	p_val_adj		gene	p_val	avg_logFC	pct.1	pct.2	p_val_adj		gene
HIST1H4C	2.97603e-276	1.11523	0.955	0.702	4.47594e-272		H2AFZ	4.29188e-301	-0.678446	0.958	0.985	6.45499e-297		HSP90AA1	0	-0.925554	1	0.996	0		PTTG1	8.61042e-220	0.92967	0.884	0.464	1.29501e-215		PLK1	1.96005e-282	0.758191	0.844	0.169	2.94791e-278		KRT81	2.62746e-273	2.11156	0.842	0.197	3.9517e-269		FAM211A	3.45164e-95	1.51065	0.854	0.379	5.19126e-91		IFIT2
ATAD2	5.04284e-261	0.680297	0.905	0.514	7.58443e-257		UBE2S	1.71693e-279	-1.13403	0.653	0.931	2.58227e-275		RPL12	1.20641e-306	0.44984	1	1	1.81444e-302		HMGB1	6.68909e-157	0.451381	1	0.993	1.00604e-152		TOP2A	3.77951e-277	1.19787	0.983	0.354	5.68438e-273		TMSB4X	1.21214e-218	-1.22642	0.857	0.993	1.82307e-214		COX6C	6.90433e-92	-0.992844	0.771	0.997	1.03841e-87		IFIT3
FEN1	9.79965e-220	0.499153	0.645	0.22	1.47387e-215		CENPF	2.32017e-270	-1.18478	0.146	0.722	3.48953e-266		HSP90AB1	2.98199e-306	-0.910983	0.98	0.985	4.48492e-302		PRDX1	7.22274e-157	0.439847	0.996	0.98	1.0863e-152		CDK1	6.48629e-256	0.848608	0.91	0.243	9.75539e-252		SOX2	8.40328e-198	0.768384	0.443	0.052	1.26385e-193		PRDX2	9.06788e-89	-1.0853	0.682	0.994	1.36381e-84		IFIT1
FAM111B	4.08375e-213	0.398269	0.433	0.077	6.14196e-209		KIAA0101	7.83598e-265	-0.929904	0.275	0.797	1.17853e-260		RPL41	2.68006e-283	0.380179	1	1	4.03082e-279		PTMA	2.01125e-144	0.338855	1	0.997	3.02492e-140		AURKA	2.8748e-252	0.717928	0.812	0.172	4.32369e-248		MT-ATP6	1.14747e-144	-0.466992	0.998	0.999	1.72579e-140		S100A11	1.54658e-87	-1.07022	0.828	0.995	2.32606e-83		CCL5
CLSPN	8.40409e-209	0.472732	0.584	0.18	1.26397e-204		HMGB1	1.71921e-255	-0.662068	0.986	0.996	2.5857e-251		PHGDH	1.21239e-281	-0.941453	0.985	0.976	1.82344e-277		DYNLL1	3.04417e-135	0.41854	0.996	0.972	4.57843e-131		UBE2C	3.04638e-249	1.3671	0.998	0.606	4.58175e-245		ARHGDIB	1.30144e-135	-0.861375	0.223	0.821	1.95737e-131		PRDX1	6.65897e-85	-1.16306	0.667	0.994	1.00151e-80		IFNL1
KIAA0101	5.43897e-205	0.642015	0.935	0.602	8.18021e-201		CDC20	5.05617e-244	-1.23442	0.139	0.691	7.60448e-240		NPM1	2.95982e-277	-0.683189	0.999	0.994	4.45157e-273		NUCKS1	7.18772e-130	0.471849	0.994	0.955	1.08103e-125		CENPF	2.577e-243	1.26744	1	0.555	3.87581e-239		MT-CO3	1.18232e-127	-0.373846	0.998	0.998	1.7782e-123		PHGDH	1.94901e-83	-1.26393	0.651	0.989	2.93131e-79		RSAD2
RNASEH2A	1.16958e-202	0.562447	0.923	0.62	1.75905e-198		HMGB2	5.37438e-225	-0.877947	0.177	0.701	8.08307e-221		ANXA2	1.29943e-276	-0.627355	0.999	0.995	1.95435e-272		HIST1H4C	1.91842e-128	-1.29859	0.536	0.801	2.8853e-124		NUSAP1	4.9815e-240	1.00555	0.979	0.371	7.49218e-236		SAT1	8.48396e-123	-0.468721	0.996	0.998	1.27599e-118		MGST3	1.28092e-81	-1.12792	0.307	0.965	1.9265e-77		HERC5
RRM2	1.15215e-176	0.530534	0.694	0.311	1.73284e-172		MKI67	5.73134e-199	-0.695598	0.043	0.544	8.61994e-195		RPS12	1.60775e-265	0.36951	1	1	2.41806e-261		PTMS	1.52237e-127	0.434152	0.991	0.954	2.28964e-123		KPNA2	2.04949e-237	1.16847	0.977	0.433	3.08244e-233		VIM	1.88668e-118	-0.946964	0.232	0.798	2.83757e-114		MYL6	3.70275e-79	-0.975105	0.604	0.99	5.56893e-75		IFI44
PCNA	7.68663e-176	0.46885	0.699	0.306	1.15607e-171		CKS1B	3.29159e-196	-0.6795	0.581	0.888	4.95055e-192		MT-CO2	5.59254e-263	0.395669	1	0.999	8.41118e-259		ANP32E	1.47292e-125	0.579902	0.93	0.759	2.21527e-121		DLGAP5	4.59425e-237	0.68911	0.819	0.183	6.90975e-233		MT-CYB	4.541e-118	-0.35519	1	0.998	6.82966e-114		PSMB3	9.15816e-76	-1.0766	0.24	0.936	1.37739e-71		OASL
DUT	3.13637e-173	0.513058	0.966	0.786	4.7171e-169		MYBL2	8.57839e-195	-0.585893	0.106	0.61	1.29019e-190		PRDX1	4.48705e-255	-0.76071	0.988	0.981	6.74852e-251		NPM1	2.23843e-125	0.353801	0.999	0.994	3.36659e-121		ASPM	1.55128e-236	0.871409	0.925	0.284	2.33313e-232		RPL26	1.64124e-117	0.428508	0.998	0.998	2.46843e-113		STMN1	1.98757e-75	-1.13905	0.755	0.994	2.9893e-71		DDX58
HELLS	4.39848e-162	0.465301	0.692	0.323	6.61531e-158		TYMS	9.93892e-195	-0.645209	0.186	0.685	1.49481e-190		SSB	3.9247e-245	-0.750909	0.973	0.972	5.90274e-241		CDC20	2.3494e-125	0.885565	0.812	0.526	3.5335e-121		NDC80	2.95573e-224	0.734562	0.846	0.216	4.44542e-220		MT1G	4.56739e-111	0.411443	0.328	0.051	6.86936e-107		RPLP0	3.43064e-75	0.468037	1	1	5.15969e-71		CMPK2
MCM10	8.86885e-162	0.347976	0.416	0.103	1.33387e-157		TOP2A	7.42145e-192	-0.833058	0.033	0.517	1.11619e-187		KRT19	3.99167e-244	-0.711234	1	0.992	6.00347e-240		LDHA	4.86702e-125	0.47153	0.983	0.903	7.32e-121		HMMR	4.32153e-220	0.702416	0.829	0.209	6.49958e-216		NDUFB7	4.68565e-108	0.434163	0.998	0.988	7.04721e-104		POMP	6.15554e-75	-0.858586	0.792	0.994	9.25793e-71		DDX60
NASP	2.91925e-161	0.509072	0.945	0.723	4.39054e-157		UBE2C	4.30692e-191	-1.06969	0.318	0.733	6.47761e-187		CCT3	6.33464e-240	-0.684013	0.987	0.979	9.52729e-236		HSP90AA1	2.58282e-123	0.403182	1	0.996	3.88456e-119		CKS2	6.97062e-217	1.09276	1	0.799	1.04838e-212		EIF4A1	8.7001e-103	0.597283	0.98	0.929	1.3085e-98		KRT19	1.63405e-72	-0.922098	0.917	0.996	2.45762e-68		ZC3HAV1
ASF1B	2.31558e-154	0.419026	0.626	0.265	3.48263e-150		HIST1H4C	1.85157e-190	-1.31774	0.539	0.825	2.78476e-186		MALAT1	6.85959e-235	-1.19526	0.996	0.995	1.03168e-230		UBE2S	4.99027e-112	0.599113	0.972	0.851	7.50536e-108		MKI67	2.28676e-209	0.845822	0.962	0.382	3.43928e-205		MT-CO1	8.72404e-103	-0.341581	0.998	0.998	1.3121e-98		RPLP1	2.63517e-71	0.34225	1	1	3.9633e-67		IFIH1
E2F1	4.77207e-147	0.365914	0.547	0.201	7.17719e-143		PTTG1	4.63687e-184	-0.891781	0.161	0.63	6.97385e-180		RPS28	7.39024e-234	0.279296	1	1	1.11149e-229		HSP90AB1	1.42293e-111	0.412247	0.999	0.981	2.14009e-107		CCNB1	6.53396e-205	0.716487	0.819	0.215	9.82707e-201		TECR	1.43114e-102	0.528182	0.987	0.949	2.15244e-98		MYL12B	1.551e-70	-0.954293	0.51	0.988	2.3327e-66		RARRES3
MCM7	3.52599e-145	0.446591	0.834	0.529	5.30309e-141		TPX2	2.13196e-179	-0.666359	0.073	0.544	3.20647e-175		MYL12B	1.56317e-217	-0.631474	0.982	0.969	2.35101e-213		HMGN2	4.50969e-109	0.435794	0.983	0.9	6.78257e-105		TPX2	1.00416e-204	0.871151	0.952	0.39	1.51026e-200		MGP	7.53111e-99	-0.862893	0.742	0.975	1.13268e-94		NDUFS5	7.26267e-70	-0.866844	0.682	0.988	1.09231e-65		ISG15
MCM3	7.7024e-139	0.412785	0.594	0.252	1.15844e-134		SMC4	6.58804e-174	-0.595518	0.152	0.627	9.90841e-170		FTL	1.07657e-215	0.438364	1	0.999	1.61916e-211		HSPD1	1.1368e-106	0.428336	0.986	0.937	1.70975e-102		CENPE	1.58345e-204	0.584647	0.683	0.139	2.38151e-200		CALM2	2.2027e-94	0.630287	0.998	0.982	3.31287e-90		C1orf56	2.73081e-66	1.02075	0.615	0.204	4.10713e-62		IDO1
MCM5	1.59819e-135	0.390381	0.631	0.287	2.40369e-131		CKS2	1.24305e-171	-0.894834	0.619	0.873	1.86955e-167		RPL29	4.53697e-213	0.270901	1	1	6.82361e-209		POMP	2.44297e-104	0.317868	0.999	0.985	3.67423e-100		CDCA3	1.78076e-203	0.527998	0.692	0.143	2.67827e-199		RPS8	8.06265e-91	-0.25485	1	1	1.21262e-86		MYL12A	1.95918e-65	-0.932508	0.51	0.982	2.94661e-61		ISG20
DSCC1	4.47292e-129	0.33067	0.454	0.153	6.72727e-125		BIRC5	4.48705e-169	-0.586693	0.05	0.505	6.74853e-165		RPL28	3.80093e-201	0.264434	1	1	5.71659e-197		ILF2	2.87111e-95	0.399623	0.968	0.887	4.31814e-91		PIF1	1.64736e-202	0.331621	0.438	0.047	2.47762e-198		LTF	2.40176e-86	1.09053	0.957	0.835	3.61225e-82		H3F3A	6.47128e-65	-0.617218	0.969	0.999	9.7328e-61		TNFSF10
MCM4	4.79269e-127	0.427631	0.74	0.42	7.20821e-123		RRM2	1.24177e-166	-0.535306	0.049	0.502	1.86762e-162		HSPD1	1.28739e-199	-0.699461	0.926	0.948	1.93623e-195		SSB	2.06073e-94	0.372475	0.989	0.969	3.09933e-90		CDC20	1.40155e-193	1.06529	0.994	0.527	2.10792e-189		MT-ND3	2.79703e-86	-0.274095	0.998	0.998	4.20674e-82		B2M	1.04209e-64	-0.829476	0.823	0.996	1.56731e-60		PLAUR
DTL	5.10516e-125	0.287561	0.328	0.078	7.67816e-121		CDKN3	1.49018e-166	-0.643951	0.097	0.551	2.24123e-162		MYL12A	4.45488e-199	-0.655689	0.974	0.964	6.70013e-195		FABP5	8.47443e-92	0.347464	0.995	0.974	1.27455e-87		HMGB2	1.32481e-191	0.906777	0.994	0.545	1.99252e-187		MT-CO2	6.73545e-85	-0.282352	0.998	1	1.01301e-80		UBB	1.44638e-64	-0.88303	0.521	0.985	2.17536e-60		SAMD9
STMN1	2.17716e-121	0.336006	1	0.981	3.27444e-117		PRC1	4.16102e-166	-0.565942	0.048	0.498	6.25818e-162		UBC	1.91362e-192	-0.767675	0.844	0.919	2.87809e-188		NMU	3.55166e-90	0.33628	0.352	0.104	5.34169e-86		CCNB2	3.22103e-187	0.746981	0.923	0.335	4.84442e-183		FAU	7.60959e-79	0.272026	1	0.999	1.14448e-74		ANXA1	1.47241e-64	-1.09794	0.391	0.947	2.21451e-60		PMAIP1
CDT1	1.37328e-119	0.3559	0.565	0.254	2.06541e-115		NUSAP1	5.22419e-166	-0.670643	0.073	0.525	7.85719e-162		RPLP1	2.34621e-187	0.251036	1	1	3.5287e-183		PRMT1	1.08679e-89	0.408181	0.965	0.869	1.63453e-85		PRC1	1.91436e-186	0.741407	0.925	0.347	2.8792e-182		RPL9	1.535e-77	0.299406	1	0.999	2.30864e-73		NDUFA4	7.50098e-64	-0.659333	0.859	0.998	1.12815e-59		FGF2
GGCT	4.76292e-119	0.363745	0.956	0.815	7.16343e-115		ATAD2	1.13927e-143	-0.600456	0.295	0.695	1.71346e-139		ENO1	1.16066e-181	-0.611446	0.965	0.961	1.74564e-177		HNRNPA2B1	1.56683e-89	0.396662	0.985	0.939	2.35652e-85		CENPA	5.96991e-184	0.570782	0.76	0.194	8.97875e-180		PRDX2	2.661e-71	0.357194	0.998	0.981	4.00215e-67		GSTP1	3.58662e-63	-0.554488	0.995	0.999	5.39428e-59		PARP14
CDC6	2.80418e-117	0.257158	0.316	0.075	4.21748e-113		NUDT1	1.14876e-138	-0.495099	0.357	0.755	1.72774e-134		EPCAM	1.52557e-165	-0.620301	0.889	0.924	2.29446e-161		EBNA1BP2	5.54353e-85	0.427018	0.917	0.804	8.33747e-81		SGOL2	7.46222e-177	0.432912	0.596	0.113	1.12232e-172		RPL6	5.54675e-66	0.251837	1	0.999	8.34231e-62		S100A6	2.86597e-62	-0.562597	0.984	1	4.31042e-58		B2M
GINS2	9.3209e-116	0.297338	0.43	0.147	1.40186e-111		ASPM	1.75523e-138	-0.527013	0.034	0.427	2.63987e-134		CALR	3.87544e-164	-0.596965	0.938	0.954	5.82866e-160		CDKN3	2.99185e-81	0.474047	0.696	0.407	4.49974e-77		KIF23	6.58988e-176	0.586022	0.752	0.203	9.91118e-172		CCL28	3.99845e-64	-0.48389	0.033	0.457	6.01366e-60		CFL1	1.59707e-60	-0.71337	0.781	0.989	2.40199e-56		GRB10
RFC2	4.35151e-115	0.351496	0.582	0.27	6.54466e-111		CEP55	5.18037e-138	-0.451423	0.038	0.432	7.79128e-134		ANXA1	3.32207e-162	-0.764022	0.944	0.924	4.99639e-158		HSPE1	2.06645e-79	0.288931	0.994	0.974	3.10794e-75		KIF2C	4.43184e-172	0.418145	0.573	0.105	6.66549e-168		CD74	6.31863e-63	0.354229	0.178	0.025	9.50322e-59		SNRPB	2.83789e-60	-0.819206	0.354	0.943	4.26819e-56		SLPI
TYMS	6.29073e-115	0.422681	0.807	0.502	9.46126e-111		CENPW	1.04302e-137	-0.430909	0.105	0.525	1.5687e-133		RPS23	2.68191e-159	0.256151	1	0.999	4.03359e-155		CCNB2	3.5496e-77	0.520526	0.609	0.348	5.3386e-73		CCNA2	1.45868e-168	0.518324	0.71	0.179	2.19385e-164		SLC25A6	9.36378e-63	-0.444171	0.761	0.936	1.40831e-58		ANXA2	2.56222e-58	-0.651688	0.932	0.998	3.85357e-54		NOV
RFC4	9.65021e-115	0.332787	0.531	0.226	1.45139e-110		KRT19	1.13695e-134	0.337952	0.994	0.993	1.70998e-130		PRMT1	1.65002e-156	-0.635148	0.812	0.896	2.48163e-152		STMN1	1.25948e-70	0.319629	1	0.983	1.89426e-66		FAM83D	3.69734e-166	0.486132	0.688	0.169	5.56081e-162		CAST	1.87045e-61	0.637724	0.9	0.793	2.81316e-57		YBX1	6.03488e-58	0.555405	1	1	9.07646e-54		IFITM3
RPA3	4.86695e-108	0.387698	0.937	0.767	7.3199e-104		CCNB2	9.96704e-134	-0.560794	0.082	0.474	1.49904e-129		SERF2	1.79534e-156	0.286396	1	1	2.70019e-152		LSM5	2.28115e-70	0.337258	0.953	0.895	3.43084e-66		DEPDC1	8.73759e-166	0.462821	0.658	0.148	1.31413e-161		GSTP1	2.63215e-61	0.271428	1	0.999	3.95875e-57		SSB	8.44407e-57	-0.801786	0.688	0.982	1.26999e-52		IFI27
UBE2T	2.58059e-103	0.369953	0.774	0.481	3.88121e-99		NUF2	3.63892e-131	-0.479846	0.042	0.424	5.47294e-127		UBB	1.38412e-155	-0.542974	0.981	0.967	2.08172e-151		KLF2	3.29423e-70	-0.487472	0.186	0.522	4.95452e-66		NUF2	3.0902e-164	0.635332	0.85	0.289	4.64765e-160		PFN1	4.79907e-61	0.397735	0.993	0.96	7.2178e-57		SRP14	2.42529e-56	-0.698058	0.609	0.986	3.64763e-52		C5orf56
STRA13	8.99317e-102	0.368319	0.908	0.671	1.35257e-97		MT2A	1.3856e-130	-0.663438	0.679	0.9	2.08395e-126		PSMB3	4.01114e-155	-0.612295	0.869	0.919	6.03275e-151		TUBA1B	5.57148e-70	0.264546	0.999	0.981	8.3795e-66		TUBA1C	4.21767e-163	0.770139	0.998	0.814	6.34337e-159		CYP1B1	8.77916e-60	0.462484	0.983	0.949	1.32039e-55		LGALS1	2.60271e-56	-0.737502	0.833	0.996	3.91447e-52		SDC4
TUBB	1.20987e-101	0.302067	0.998	0.959	1.81964e-97		BCL2L12	1.39897e-128	-0.442594	0.227	0.637	2.10405e-124		NCL	7.49055e-152	-0.690374	0.905	0.905	1.12658e-147		UBB	3.56021e-68	0.282077	0.989	0.965	5.35456e-64		CDCA8	1.71612e-159	0.47325	0.658	0.16	2.58105e-155		SMS	4.05712e-55	-0.460736	0.584	0.852	6.10191e-51		S100A1	1.39886e-55	-0.729135	0.651	0.983	2.10388e-51		HERC6
H2AFZ	1.12942e-100	0.291806	0.996	0.974	1.69865e-96		STMN1	2.67441e-128	-0.498106	0.989	0.985	4.02232e-124		PRDX2	1.02475e-151	-0.46694	0.992	0.981	1.54123e-147		LGALS1	8.005e-68	0.267392	1	0.988	1.20395e-63		UBE2S	6.15653e-159	0.827079	1	0.856	9.25943e-155		OAZ1	9.38685e-53	0.319329	0.993	0.984	1.41178e-48		PSMD8	2.0803e-55	-0.799234	0.307	0.915	3.12877e-51		LY6E
SMC2	2.33852e-99	0.333736	0.614	0.312	3.51714e-95		DUT	2.73945e-128	-0.533423	0.664	0.875	4.12013e-124		SKP1	2.20007e-147	-0.541732	0.947	0.929	3.30891e-143		CCNB1	2.60898e-67	0.494252	0.483	0.23	3.92391e-63		ANLN	3.2176e-158	0.616857	0.84	0.287	4.83928e-154		S100A11	4.23303e-52	-0.371595	0.987	0.989	6.36648e-48		MGST1	2.15026e-54	-0.752031	0.557	0.98	3.23398e-50		CEBPB
HAT1	7.11331e-94	0.370087	0.748	0.485	1.06984e-89		ANLN	3.61312e-122	-0.441098	0.049	0.417	5.43413e-118		NASP	5.84159e-143	-0.685194	0.629	0.801	8.78575e-139		PSMA4	8.77021e-66	0.331616	0.946	0.888	1.31904e-61		CDKN3	3.73859e-158	0.723446	0.929	0.404	5.62283e-154		CRABP2	6.13137e-52	-0.498568	0.395	0.759	9.22159e-48		SNRPD1	2.59595e-54	-0.750655	0.521	0.962	3.9043e-50		SQRDL
POLD3	9.20134e-94	0.276565	0.462	0.191	1.38388e-89		TK1	1.36229e-121	-0.434017	0.154	0.548	2.04888e-117		FTH1	5.64514e-142	0.365645	1	0.999	8.49029e-138		JUND	3.58759e-65	-0.325229	0.928	0.968	5.39573e-61		CASC5	1.15185e-156	0.387044	0.598	0.124	1.73239e-152		PCSK1N	6.14286e-52	-0.435991	0.447	0.772	9.23886e-48		NPM1	3.83075e-54	-0.670341	0.901	0.998	5.76144e-50		IFI35
CARHSP1	1.11656e-92	0.352048	0.901	0.716	1.6793e-88		PTMA	1.00282e-119	-0.295849	0.998	0.998	1.50823e-115		PPIA	7.72628e-141	-0.330964	1	0.996	1.16203e-136		SET	5.86443e-65	0.310314	0.986	0.972	8.8201e-61		NEK2	3.80797e-154	0.453081	0.598	0.133	5.72718e-150		KRT18	6.4422e-52	0.377553	0.983	0.969	9.68907e-48		FTH1	1.79383e-53	0.461527	1	0.999	2.69793e-49		IRF1
TK1	3.09556e-92	0.364443	0.671	0.396	4.65572e-88		NUCKS1	2.2194e-119	-0.438897	0.903	0.977	3.33797e-115		EIF4A1	1.21042e-139	-0.563285	0.922	0.935	1.82047e-135		PSMB2	1.5739e-64	0.344797	0.922	0.812	2.36715e-60		BIRC5	5.79511e-150	0.624896	0.904	0.356	8.71584e-146		KRT5	9.10657e-52	0.513787	0.911	0.826	1.36963e-47		SUB1	2.02252e-53	-0.739589	0.5	0.968	3.04186e-49		MX1
BRCA2	1.08378e-89	0.267321	0.425	0.173	1.63001e-85		RNASEH2A	6.95262e-119	-0.536658	0.432	0.766	1.04567e-114		TMSB10	7.45861e-137	0.314536	1	0.998	1.12178e-132		RPS26	7.87732e-64	0.260233	0.993	0.977	1.18475e-59		STMN1	9.46867e-147	0.576753	1	0.984	1.42409e-142		ANXA1	2.47914e-51	-0.541322	0.783	0.94	3.72863e-47		SSBP1	3.11719e-53	-0.731774	0.255	0.894	4.68825e-49		LCN2
PRKDC	6.96824e-89	0.278736	0.985	0.949	1.04802e-84		RPL39L	1.93613e-113	-0.414121	0.295	0.679	2.91194e-109		HNRNPA2B1	1.32683e-132	-0.546927	0.959	0.943	1.99556e-128		EPCAM	1.13012e-63	0.31497	0.984	0.907	1.6997e-59		PTTG1	5.21318e-146	0.766794	0.965	0.484	7.84062e-142		SLC25A3	3.84982e-51	0.29852	0.996	0.974	5.79014e-47		PSMB1	6.40962e-53	-0.797143	0.297	0.917	9.64007e-49		HLA-B
BRCA1	9.27793e-88	0.25197	0.394	0.154	1.3954e-83		FMO2	1.59479e-112	0.539768	0.684	0.42	2.39856e-108		DDX5	3.80967e-132	-0.598651	0.74	0.832	5.72974e-128		BIRC5	5.76095e-63	0.448068	0.605	0.369	8.66448e-59		ARL6IP1	1.34476e-144	0.715773	0.912	0.452	2.02251e-140		IER3	5.86793e-50	0.437208	0.98	0.97	8.82537e-46		GADD45GIP1	5.52518e-52	-0.675582	0.661	0.985	8.30987e-48		SPAG9
GMNN	2.64467e-87	0.285615	0.536	0.264	3.97758e-83		PHF19	1.8747e-112	-0.407805	0.194	0.584	2.81954e-108		2021-09-07	1.32688e-131	-0.574967	0.779	0.851	1.99563e-127		HSPB1	3.36323e-62	0.25605	0.996	0.99	5.0583e-58		HN1	1.72916e-142	0.592939	0.998	0.917	2.60066e-138		ETFB	8.73696e-50	0.476659	0.709	0.494	1.31404e-45		NDUFB7	7.73837e-52	-0.61933	0.797	0.996	1.16385e-47		RTP4
ZWINT	2.04907e-86	0.289717	0.5	0.237	3.08181e-82		SMC2	2.20314e-112	-0.392365	0.097	0.465	3.31353e-108		LDHB	2.00654e-131	-0.458199	0.985	0.969	3.01784e-127		ENO1	1.23412e-61	0.281598	0.98	0.958	1.85611e-57		GTSE1	2.17441e-140	0.428986	0.602	0.148	3.27031e-136		APOC1	1.24322e-49	0.572244	0.575	0.322	1.8698e-45		CD63	8.73336e-52	-0.790846	0.26	0.895	1.3135e-47		BST2
RMI2	1.87976e-85	0.26555	0.421	0.178	2.82716e-81		ASF1B	7.37336e-112	-0.381727	0.072	0.429	1.10895e-107		LAPTM4A	1.32497e-129	-0.563575	0.795	0.859	1.99276e-125		SLIRP	5.92493e-61	0.334567	0.933	0.856	8.91109e-57		KIF14	2.88308e-139	0.338584	0.473	0.088	4.33615e-135		TKT	1.97439e-49	0.438219	0.98	0.956	2.96949e-45		HSPE1	1.15782e-51	-0.668625	0.724	0.986	1.74136e-47		PPM1K
DNMT1	9.10789e-85	0.328145	0.81	0.578	1.36983e-80		HMMR	4.63934e-110	-0.408534	0.012	0.335	6.97757e-106		ILF2	3.06961e-128	-0.535946	0.899	0.899	4.61669e-124		C19orf43	8.96149e-61	-0.261274	0.962	0.987	1.34781e-56		BUB1	4.70627e-134	0.296708	0.469	0.086	7.07824e-130		RNASEH2C	2.06792e-49	0.432075	0.69	0.457	3.11015e-45		ATP5J2	1.01452e-50	-0.726858	0.495	0.966	1.52584e-46		WARS
PKMYT1	6.23967e-84	0.282795	0.488	0.235	9.38446e-80		TUBA1B	1.76681e-104	-0.341015	0.959	0.99	2.65728e-100		RPL7	6.74014e-128	-0.253271	1	1	1.01372e-123		HNRNPK	5.34981e-59	0.329524	0.93	0.881	8.04611e-55		TUBB4B	2.04555e-133	0.714438	0.994	0.786	3.07651e-129		TPM2	4.90887e-49	-0.43557	0.414	0.783	7.38294e-45		FABP5	1.54285e-50	-0.688171	0.724	0.987	2.32045e-46		H3F3A
MCM6	7.20033e-84	0.253155	0.428	0.174	1.08293e-79		LSM5	6.57551e-104	-0.371587	0.795	0.935	9.88956e-100		CALM2	1.04783e-126	-0.543815	0.998	0.981	1.57593e-122		PPA1	1.25816e-58	0.286374	0.968	0.932	1.89227e-54		CALM2	2.33108e-133	0.540208	1	0.982	3.50594e-129		NDUFB11	1.5983e-48	-0.381184	0.792	0.937	2.40385e-44		CALM2	2.79979e-50	-0.77328	0.776	0.991	4.21089e-46		APOL6
DNAJC9	2.70389e-80	0.291953	0.563	0.306	4.06665e-76		CDK1	1.46491e-103	-0.41452	0.047	0.374	2.20323e-99		MGST1	3.4553e-126	-0.44021	0.988	0.961	5.19677e-122		PFDN2	4.29575e-58	0.287319	0.962	0.935	6.46081e-54		AURKB	4.54771e-129	0.383597	0.575	0.141	6.83975e-125		CFL1	2.81916e-48	0.299484	0.998	0.98	4.24001e-44		LAPTM4A	2.80863e-50	-0.735913	0.245	0.871	4.22418e-46		RARRES1
KLF2	8.91396e-77	0.383876	0.667	0.412	1.34066e-72		NDC80	2.10787e-103	-0.396949	0.025	0.341	3.17024e-99		NDUFS2	1.12306e-125	-0.571836	0.613	0.785	1.68908e-121		NME1	1.23659e-56	0.307462	0.965	0.903	1.85983e-52		KIF20B	2.42026e-128	0.468953	0.69	0.211	3.64007e-124		DSTN	6.3146e-48	0.414686	0.95	0.912	9.49716e-44		UBC	4.62124e-50	-0.822291	0.375	0.927	6.95034e-46		SYNM
MGP	3.5781e-74	0.33236	0.985	0.946	5.38146e-70		PKMYT1	1.76065e-102	-0.318408	0.042	0.367	2.64801e-98		AZGP1	1.89585e-122	-0.550147	0.979	0.951	2.85136e-118		PSMA7	7.04717e-56	0.262771	0.993	0.981	1.05989e-51		NCAPG	8.80507e-128	0.406463	0.615	0.159	1.32428e-123		C1QBP	7.95528e-48	0.407063	0.905	0.79	1.19647e-43		RPS26	5.50204e-50	-0.648279	0.719	0.989	8.27506e-46		IFI6
CHAF1A	1.57708e-73	0.253538	0.434	0.204	2.37194e-69		MAD2L1	2.69094e-102	-0.373813	0.091	0.434	4.04718e-98		EPRS	3.92591e-122	-0.567254	0.712	0.822	5.90457e-118		PSMB3	1.1169e-55	0.302753	0.974	0.901	1.67982e-51		CKS1B	1.05336e-127	0.594236	0.998	0.803	1.58426e-123		YWHAE	2.44145e-47	0.450162	0.781	0.604	3.67194e-43		IER3	9.21335e-50	-0.839456	0.708	0.98	1.38569e-45		PDP1
HSPA2	2.76502e-71	0.325666	0.861	0.669	4.15858e-67		CALD1	4.51621e-101	0.535493	0.919	0.843	6.79238e-97		TALDO1	1.33178e-121	-0.485215	0.914	0.923	2.00299e-117		NEAT1	1.15322e-55	-0.356244	0.94	0.981	1.73445e-51		MXD3	2.14587e-127	0.34691	0.498	0.107	3.22739e-123		WDR83OS	3.5292e-47	0.319734	0.991	0.967	5.30791e-43		DAD1	9.41872e-50	-0.725887	0.214	0.844	1.41658e-45		KLF4
PHGDH	8.59048e-71	0.270817	0.999	0.971	1.29201e-66		HMGN2	2.115e-95	-0.396481	0.81	0.941	3.18096e-91		PSMA4	3.97786e-120	-0.517833	0.885	0.899	5.9827e-116		MAGOH	1.69532e-55	0.292817	0.94	0.87	2.54976e-51		PSRC1	1.34727e-122	0.27608	0.402	0.07	2.0263e-118		BTG1	2.42602e-46	0.44734	0.989	0.956	3.64874e-42		MT-CO2	1.4886e-49	0.39201	1	0.999	2.23885e-45		C15orf48
PTMS	2.9024e-69	-0.308397	0.961	0.959	4.36521e-65		CENPA	5.73555e-95	-0.331304	0.017	0.309	8.62627e-91		MGST3	1.29126e-117	-0.473042	0.936	0.943	1.94205e-113		HDGF	1.43784e-54	0.330832	0.905	0.821	2.16252e-50		KIFC1	2.19179e-117	0.358232	0.554	0.141	3.29645e-113		CCND1	2.30589e-45	0.407483	0.959	0.922	3.46805e-41		RPL12	2.00371e-49	0.34814	1	1	3.01358e-45		CLDN1
MSH2	3.92958e-69	0.267413	0.555	0.304	5.91008e-65		DLGAP5	1.29346e-94	-0.349864	0.014	0.304	1.94537e-90		STMN1	3.47821e-115	-0.546503	0.995	0.984	5.23122e-111		PRDX4	5.22448e-54	0.318904	0.925	0.822	7.85761e-50		KIF20A	6.0529e-117	0.290921	0.412	0.078	9.10356e-113		TAGLN2	3.29926e-45	-0.32339	0.946	0.986	4.96209e-41		MT-ND4	1.42948e-48	0.362901	1	0.999	2.14994e-44		PSMB9
SIVA1	2.26379e-65	0.273991	0.963	0.843	3.40474e-61		MGP	2.72371e-90	0.685617	0.984	0.947	4.09647e-86		HSPA8	4.37044e-115	-0.501832	0.947	0.928	6.57314e-111		NCL	6.96943e-54	0.357024	0.949	0.898	1.0482e-49		HMGB1	1.18761e-116	0.443784	1	0.993	1.78617e-112		APOE	4.36934e-45	0.839335	0.753	0.577	6.57149e-41		EPCAM	3.02141e-48	-0.743383	0.37	0.939	4.54421e-44		TYMP
SOX4	2.20984e-64	-0.345573	0.942	0.962	3.3236e-60		ANP32E	6.83733e-89	-0.480623	0.592	0.84	1.02833e-84		CALM1	7.20707e-112	-0.463244	0.987	0.965	1.08394e-107		PSMD8	1.9885e-53	0.288249	0.947	0.884	2.9907e-49		CEP55	3.53286e-116	0.492035	0.79	0.302	5.31342e-112		SAA1	2.84561e-44	-0.487829	0.568	0.848	4.2798e-40		SF3B14	4.03129e-48	-0.636634	0.495	0.956	6.06306e-44		CP
PARP1	9.28805e-64	0.268427	0.924	0.789	1.39692e-59		CENPM	1.54774e-87	-0.285376	0.062	0.365	2.3278e-83		CALD1	3.68018e-111	-0.737101	0.833	0.865	5.53499e-107		PPIH	5.27054e-52	0.328795	0.815	0.647	7.92689e-48		SMC4	1.50107e-114	0.58374	0.925	0.482	2.25761e-110		CD99	3.76059e-44	-0.342055	0.115	0.468	5.65592e-40		SLIRP	5.31615e-48	-0.72373	0.297	0.888	7.99549e-44		IRF2BPL
TUBG1	2.55421e-63	0.259953	0.636	0.406	3.84154e-59		H2AFV	1.58429e-87	-0.355927	0.694	0.907	2.38277e-83		ALDOA	1.92794e-109	-0.366734	0.998	0.979	2.89963e-105		SSBP1	1.67646e-51	0.282222	0.937	0.86	2.5214e-47		INCENP	4.3501e-112	0.27592	0.417	0.08	6.54255e-108		MSX1	4.45241e-44	0.430705	0.462	0.217	6.69642e-40		EEF1A1	1.98802e-47	0.301182	1	1	2.98998e-43		YBX1
RRM1	1.01634e-61	0.261306	0.556	0.329	1.52858e-57		PLK1	3.77857e-87	-0.336591	0.016	0.288	5.68296e-83		TKT	1.0773e-108	-0.459787	0.974	0.955	1.62026e-104		CARHSP1	3.76173e-50	-0.33598	0.584	0.79	5.65764e-46		KIF11	6.05804e-112	0.350626	0.525	0.132	9.11129e-108		AIP	1.51197e-43	0.387313	0.727	0.523	2.274e-39		SRI	2.69817e-47	-0.729862	0.26	0.872	4.05804e-43		XBP1
SFN	3.17216e-60	0.279801	0.811	0.615	4.77093e-56		KIF20B	4.97199e-87	-0.29878	0.034	0.316	7.47788e-83		EIF4EBP1	3.7502e-108	0.33225	0.998	0.961	5.6403e-104		UBE2C	5.68736e-50	-0.547469	0.428	0.677	8.55379e-46		TTK	6.83646e-112	0.317034	0.506	0.119	1.0282e-107		CLDN7	2.78325e-42	0.407142	0.881	0.787	4.186e-38		PABPC1	6.80943e-47	0.497448	0.995	0.994	1.02414e-42		JUNB
EMP2	6.65929e-57	0.26071	0.643	0.435	1.00156e-52		CCNB1	4.60912e-86	-0.420446	0.047	0.331	6.93211e-82		PSMD2	9.0049e-108	-0.531161	0.667	0.784	1.35434e-103		FTH1	8.83165e-49	-0.255547	1	0.999	1.32828e-44		KNSTRN	1.43899e-111	0.358238	0.55	0.147	2.16425e-107		SNRPB	1.16241e-41	0.325743	0.97	0.918	1.74826e-37		PSMB2	1.23262e-46	-0.707412	0.245	0.849	1.85386e-42		SOD2
SLBP	1.14699e-55	0.255958	0.711	0.5	1.72507e-51		UBE2T	4.937e-86	-0.384569	0.291	0.624	7.42525e-82		B2M	2.56697e-107	-0.41536	0.999	0.988	3.86072e-103		MRPL51	1.13434e-48	0.277883	0.957	0.903	1.70605e-44		CKAP2L	1.64592e-110	0.254507	0.39	0.072	2.47546e-106		GADD45GIP1	2.66786e-41	0.293534	0.991	0.972	4.01246e-37		ILF2	1.34707e-46	-0.72711	0.359	0.919	2.026e-42		PDLIM4
C1orf35	3.65922e-53	0.259924	0.627	0.421	5.50347e-49		ECT2	7.1122e-86	-0.287506	0.034	0.314	1.06968e-81		CCT5	4.09097e-105	-0.524184	0.665	0.783	6.15282e-101		ATAD2	1.28037e-48	-0.437059	0.404	0.64	1.92567e-44		ECT2	1.26334e-101	0.393712	0.644	0.214	1.90006e-97		EPCAM	5.98044e-40	0.337128	0.963	0.915	8.99458e-36		COX5B	1.81428e-46	-0.634845	0.63	0.986	2.72868e-42		CITED2
ANXA1	2.90586e-51	0.251721	0.983	0.91	4.37041e-47		CCNA2	1.9446e-85	-0.287807	0.016	0.285	2.92468e-81		TPM3	1.07534e-104	-0.439812	0.984	0.953	1.61731e-100		CYCS	1.44169e-48	0.305635	0.92	0.851	2.1683e-44		BUB1B	5.76758e-101	0.293274	0.454	0.105	8.67443e-97		UBB	1.56112e-39	0.308922	0.989	0.967	2.34793e-35		NUDC	2.06002e-46	-0.692663	0.135	0.752	3.09827e-42		TINAGL1
PTTG1	6.5106e-41	-0.56404	0.438	0.552	9.79195e-37		DTYMK	1.13097e-84	-0.333853	0.198	0.533	1.70098e-80		PUF60	6.03414e-104	-0.478104	0.841	0.872	9.07535e-100		HNRNPH3	8.04526e-48	0.347246	0.753	0.595	1.21001e-43		H2AFZ	8.24648e-99	0.39937	1	0.977	1.24027e-94		B2M	7.49131e-39	-0.326202	0.976	0.991	1.12669e-34		SNRPD3	2.11923e-46	-0.68664	0.255	0.871	3.18732e-42		NUPR1
CCNB1	1.24781e-30	-0.315825	0.155	0.302	1.8767e-26		RARRES1	1.2991e-84	0.463836	0.962	0.914	1.95385e-80		IFITM3	2.86665e-103	-0.430565	0.994	0.969	4.31144e-99		DCAF13	9.78157e-48	0.3236	0.777	0.625	1.47115e-43		SAP30	1.18853e-98	0.468234	0.79	0.344	1.78755e-94		ACADVL	1.82213e-38	0.398612	0.636	0.417	2.74048e-34		MAGOH	5.46033e-46	-0.678157	0.328	0.9	8.21234e-42		HLA-C
UBE2S	3.98357e-26	-0.508308	0.922	0.852	5.99129e-22		CEBPD	2.01897e-84	0.375542	0.946	0.896	3.03653e-80		PSMB1	2.98635e-103	-0.479572	0.885	0.897	4.49147e-99		ARF1	1.2099e-47	0.281163	0.922	0.874	1.81968e-43		BUB3	1.08741e-97	0.477614	0.898	0.492	1.63546e-93		CXCL2	2.54162e-38	-0.409302	0.223	0.558	3.8226e-34		PUF60	9.84866e-46	-0.705199	0.312	0.887	1.48124e-41		S100A11
CDKN3	4.13498e-26	-0.325098	0.368	0.475	6.21901e-22		ZWINT	1.45604e-82	-0.283362	0.07	0.364	2.18988e-78		PPP1R14B	3.43198e-103	0.298461	1	0.989	5.1617e-99		E2F1	3.26965e-47	-0.270422	0.07	0.319	4.91756e-43		PRR11	4.97617e-97	0.350063	0.544	0.156	7.48416e-93		SF3B14	2.7382e-38	0.293149	0.963	0.938	4.11825e-34		PRMT1	1.22031e-45	-0.724834	0.323	0.903	1.83535e-41		ASS1
SAA1	3.94514e-25	0.265533	0.896	0.802	5.93348e-21		KRT16	9.00726e-81	-0.58768	0.589	0.831	1.35469e-76		DNAJA1	4.70492e-103	-0.535367	0.758	0.815	7.07621e-99		MCM5	2.52296e-46	-0.289725	0.14	0.407	3.79453e-42		CKAP5	5.59124e-95	0.416962	0.698	0.265	8.40923e-91		NDUFA12	2.84358e-38	0.360531	0.837	0.725	4.27674e-34		COPE	1.91228e-45	-0.666908	0.208	0.828	2.87607e-41		HEBP2
KRT81	2.77088e-15	-0.620369	0.172	0.276	4.1674e-11		RPA3	1.67197e-79	-0.37914	0.626	0.858	2.51464e-75		PSMB2	4.73032e-103	-0.503166	0.771	0.839	7.1144e-99		C10orf10	2.33402e-45	-0.378913	0.256	0.523	3.51037e-41		SPC25	6.66626e-95	0.302542	0.456	0.112	1.00261e-90		COX8A	3.62228e-38	0.33446	0.922	0.89	5.44791e-34		TUBB4B	2.32202e-45	-0.802475	0.245	0.825	3.49232e-41		HLA-A
ARL6IP1	2.62017e-13	-0.250249	0.459	0.502	3.94073e-09		PPIH	2.09707e-78	-0.358263	0.426	0.742	3.15399e-74		CD63	8.64516e-103	-0.503083	0.871	0.874	1.30023e-98		PSMB1	4.47469e-45	0.267394	0.943	0.887	6.72993e-41		NUCKS1	4.76064e-89	0.410567	1	0.957	7.16e-85		CKB	6.54957e-38	0.485388	0.879	0.792	9.85055e-34		TXN	9.37349e-45	-0.613558	0.719	0.989	1.40977e-40		PSME2
							KIF23	7.29438e-77	-0.286218	0.044	0.311	1.09707e-72		RAB2A	3.63211e-101	-0.461484	0.887	0.888	5.46269e-97		TCEB1	2.0382e-44	0.274469	0.96	0.902	3.06545e-40		PTMA	9.11386e-88	0.303631	0.998	0.998	1.37072e-83		HSPB1	1.20395e-37	-0.327142	0.976	0.992	1.81075e-33		AZGP1	1.09048e-44	-0.746885	0.573	0.97	1.64008e-40		S100P
							TCOF1	1.97713e-76	-0.2955	0.18	0.497	2.97361e-72		C19orf53	1.16654e-100	0.284093	1	0.983	1.75447e-96		COX17	2.24849e-44	0.304441	0.86	0.747	3.38173e-40		MAD2L1	1.03197e-83	0.378831	0.752	0.32	1.55208e-79		UBXN1	1.24466e-37	0.365094	0.839	0.736	1.87197e-33		DBI	1.52855e-44	-0.587495	0.708	0.984	2.29894e-40		IER3
							TMEM160	5.88245e-76	-0.326976	0.544	0.81	8.8472e-72		PSMA3	4.10412e-100	-0.487487	0.791	0.827	6.17259e-96		EIF4EBP1	4.98382e-43	-0.256203	0.952	0.97	7.49566e-39		ANP32E	2.11361e-83	0.500196	0.977	0.766	3.17887e-79		TRAPPC1	2.36042e-37	0.383935	0.703	0.528	3.55007e-33		COX7B	2.0294e-44	-0.638762	0.526	0.954	3.05222e-40		KRT16
							CLSPN	4.13665e-75	-0.290529	0.063	0.336	6.22152e-71		SERBP1	5.3001e-100	-0.388611	0.993	0.967	7.97134e-96		CRABP2	1.18407e-42	0.358794	0.841	0.709	1.78084e-38		CKAP2	2.30785e-81	0.306411	0.556	0.184	3.47101e-77		RGS10	3.02415e-37	-0.342985	0.716	0.885	4.54832e-33		RPL36AL	2.4041e-44	-0.636445	0.568	0.975	3.61577e-40		MAL2
							DEPDC1	3.52958e-74	-0.253171	0.011	0.245	5.30849e-70		GTF3A	1.22281e-98	0.278122	1	0.982	1.83911e-94		CDT1	1.97609e-41	-0.261266	0.12	0.363	2.97204e-37		SGOL1	3.61413e-79	0.293264	0.562	0.191	5.43565e-75		TM4SF18	4.89675e-37	-0.351972	0.163	0.488	7.36471e-33		MRPL13	7.57473e-44	-0.624029	0.172	0.791	1.13924e-39		IRF7
							SIVA1	5.37382e-74	-0.313282	0.748	0.906	8.08222e-70		PPIB	2.86911e-98	-0.464037	0.885	0.886	4.31515e-94		PSMB6	5.67356e-41	0.29742	0.827	0.713	8.53304e-37		CCNF	6.46848e-79	0.252789	0.392	0.1	9.72859e-75		S100A1	6.07162e-37	0.294238	0.993	0.97	9.13172e-33		SPCS2	1.77466e-43	-0.667936	0.25	0.843	2.66909e-39		TTC3
							LSM3	1.46454e-73	-0.340915	0.56	0.822	2.20267e-69		TUBB4B	1.28188e-96	-0.59165	0.764	0.812	1.92795e-92		HES4	1.74289e-40	-0.252344	0.949	0.971	2.62131e-36		RAD21	1.85229e-77	0.443645	0.983	0.812	2.78584e-73		PKN1	8.16998e-37	0.332516	0.915	0.841	1.22876e-32		NME1	2.46681e-43	-0.657493	0.396	0.931	3.71008e-39		AQP3
							CDKN2D	4.926e-73	-0.28654	0.118	0.409	7.4087e-69		CCT8	1.97442e-93	-0.472616	0.793	0.831	2.96953e-89		H1F0	2.37872e-40	-0.316242	0.412	0.66	3.57759e-36		TYMS	3.55126e-76	0.417613	0.919	0.54	5.3411e-72		PEG10	9.48878e-37	-0.326311	0.054	0.35	1.42711e-32		HSP90AB1	6.34297e-43	-0.694917	0.786	0.991	9.53983e-39		ITPRIPL2
							TUBA1C	4.94538e-73	-0.409701	0.691	0.87	7.43785e-69		CFL1	2.9629e-93	-0.333013	0.996	0.979	4.45621e-89		SKP1	5.88385e-40	0.251551	0.96	0.927	8.84931e-36		HNRNPA2B1	1.84221e-73	0.395243	0.998	0.941	2.77068e-69		FTL	1.91344e-36	-0.274137	0.998	1	2.87781e-32		HEBP2	9.85275e-43	0.468152	0.995	0.996	1.48185e-38		SAR1A
							ARL6IP1	1.56248e-72	-0.395633	0.258	0.559	2.34997e-68		FDPS	6.92713e-92	-0.489162	0.814	0.838	1.04184e-87		PSMA3	1.51335e-39	0.270774	0.88	0.811	2.27608e-35		PBK	2.41336e-73	0.258975	0.45	0.133	3.62969e-69		PRDX4	4.02539e-36	-0.359326	0.636	0.856	6.05419e-32		EIF6	3.82648e-42	-0.613143	0.177	0.777	5.75502e-38		NT5DC2
							UBC	1.16958e-71	0.330464	0.96	0.893	1.75905e-67		SPCS2	2.86911e-91	-0.464898	0.798	0.826	4.31515e-87		PSMA5	3.39525e-39	0.259094	0.819	0.697	5.10646e-35		TUBB	6.09964e-72	0.346821	1	0.965	9.17386e-68		YWHAB	4.76866e-36	0.299832	0.965	0.921	7.17206e-32		EBNA1BP2	4.3401e-42	-0.642857	0.25	0.842	6.52751e-38		MAP4K4
							IGFBP3	6.19114e-71	0.522215	0.799	0.673	9.31148e-67		CCDC85B	4.45437e-91	0.340528	0.993	0.878	6.69937e-87		CCT6A	4.30739e-39	0.250395	0.932	0.886	6.47832e-35		UBE2T	4.69554e-71	0.392612	0.9	0.516	7.0621e-67		LINC01133	7.56627e-36	-0.366024	0.104	0.409	1.13797e-31		ENY2	5.20467e-42	-0.572331	0.661	0.978	7.82783e-38		LGALS3
							DEK	2.31247e-69	-0.302845	0.749	0.909	3.47796e-65		PSMD8	2.5502e-90	-0.423063	0.905	0.891	3.8355e-86		HELLS	8.27743e-39	-0.284644	0.201	0.446	1.24493e-34		HSP90AA1	4.78238e-70	0.37291	1	0.996	7.19269e-66		PSMB6	2.6336e-35	0.365553	0.839	0.72	3.96093e-31		HSP90AA1	5.24614e-42	-0.645112	0.943	0.998	7.89019e-38		CLDN4
							LSM4	2.40939e-69	-0.302184	0.711	0.891	3.62372e-65		IER3	7.76433e-90	-0.501543	0.994	0.966	1.16775e-85		PHB	3.69516e-38	0.263145	0.872	0.813	5.55752e-34		GPSM2	1.04786e-69	0.292131	0.592	0.225	1.57598e-65		TM7SF2	1.3268e-34	0.389879	0.523	0.313	1.99551e-30		CHCHD2	1.11927e-41	-0.509692	0.807	0.989	1.68338e-37		SPATS2L
							RAD23A	3.5227e-69	-0.269151	0.89	0.966	5.29814e-65		PSMC3	1.02221e-89	-0.476299	0.759	0.801	1.5374e-85		SMS	4.40618e-38	0.26546	0.88	0.821	6.6269e-34		LMNA	2.69033e-69	0.36335	0.998	0.965	4.04626e-65		ERP27	1.73831e-34	-0.32695	0.174	0.484	2.61443e-30		SRSF3	1.60836e-41	-0.649884	0.396	0.923	2.41897e-37		PSME1
							MAL2	7.52551e-68	-0.318918	0.714	0.889	1.13184e-63		KRT7	3.60829e-89	-0.338917	0.999	0.988	5.42688e-85		RSL1D1	1.63592e-37	0.263343	0.88	0.817	2.46042e-33		SAPCD2	2.5538e-63	0.268681	0.508	0.185	3.84092e-59		MAP1B	1.44794e-33	0.383778	0.445	0.235	2.1777e-29		NDUFB3	1.63378e-41	-0.596647	0.13	0.724	2.4572e-37		PRRG4
							AURKA	5.04965e-67	-0.306842	0.044	0.281	7.59467e-63		SSBP1	3.2468e-86	-0.421068	0.859	0.874	4.88319e-82		MIR4435-1HG	2.29767e-37	-0.282934	0.728	0.861	3.4557e-33		CBR3	3.9259e-63	0.401961	0.898	0.553	5.90456e-59		FIBP	2.12417e-33	0.348879	0.826	0.717	3.19475e-29		BANF1	3.49751e-41	-0.653265	0.349	0.901	5.26026e-37		ELF3
							HNRNPAB	6.31399e-67	-0.306434	0.772	0.924	9.49625e-63		HNRNPK	2.43153e-85	-0.421642	0.911	0.884	3.65702e-81		MRPL3	1.88051e-36	0.267387	0.783	0.666	2.82829e-32		CDKN2D	4.73094e-63	0.325546	0.685	0.311	7.11534e-59		PHGDH	2.74227e-33	0.274286	0.996	0.976	4.12437e-29		PHB	3.88665e-41	-0.631723	0.255	0.842	5.84553e-37		TERF1
							RRM1	1.57398e-65	-0.280605	0.158	0.447	2.36727e-61		DCAF13	4.61609e-85	-0.493828	0.502	0.674	6.9426e-81		HMGB3	5.51375e-36	0.293607	0.684	0.54	8.29268e-32		HMGN2	1.59027e-61	0.349738	0.996	0.904	2.39177e-57		SLC26A2	3.96867e-33	0.530191	0.56	0.363	5.96888e-29		FTL	7.33519e-41	0.430493	1	0.999	1.10321e-36		FXYD3
							CCDC34	2.47704e-65	-0.322147	0.485	0.76	3.72547e-61		KDELR1	4.68809e-85	-0.416653	0.888	0.883	7.05089e-81		HNRNPM	2.88648e-35	0.266752	0.859	0.792	4.34126e-31		NCAPD2	3.57377e-61	0.254048	0.473	0.165	5.37495e-57		EIF1AX	7.14681e-33	-0.328397	0.529	0.791	1.07488e-28		APRT	8.1559e-41	-0.540406	0.74	0.986	1.22665e-36		PDLIM1
							CENPE	2.70521e-65	-0.254854	0.018	0.235	4.06864e-61		PPDPF	2.06524e-84	0.278161	1	0.962	3.10612e-80		CNIH4	7.67925e-35	0.273983	0.789	0.684	1.15496e-30		CLDN3	3.95489e-61	0.33107	0.998	0.971	5.94815e-57		CD63	1.06047e-32	0.346974	0.915	0.869	1.59495e-28		MMP7	2.23194e-40	-0.810001	0.307	0.847	3.35683e-36		PTMS
							ANXA1	4.15897e-65	0.332655	0.957	0.919	6.25509e-61		XRCC6	1.46876e-83	-0.461074	0.573	0.71	2.20901e-79		ZFP36L1	8.73249e-35	-0.264382	0.71	0.87	1.31337e-30		CENPW	1.45428e-60	0.336921	0.767	0.399	2.18723e-56		RHOC	1.1585e-32	-0.331192	0.627	0.853	1.74238e-28		SLC3A2	2.84477e-40	-0.610457	0.089	0.665	4.27853e-36		RAB4A
							RAD21	5.07972e-64	-0.358007	0.683	0.868	7.6399e-60		SRI	1.7123e-82	-0.446622	0.836	0.853	2.57529e-78		LINC00152	1.17661e-34	-0.266397	0.358	0.612	1.76963e-30		TUBA1B	1.61495e-60	0.300481	1	0.982	2.42889e-56		DEFB1	1.58055e-32	-0.377058	0.349	0.656	2.37715e-28		CLDN3	4.20858e-40	-0.578115	0.74	0.982	6.3297e-36		NFIX
							TMPO	1.00152e-63	-0.281717	0.199	0.489	1.50629e-59		SNRPD3	2.39389e-82	-0.410841	0.839	0.852	3.60042e-78		ODC1	1.85687e-34	0.259929	0.849	0.755	2.79273e-30		HSPA1A	2.05204e-59	0.369506	0.89	0.54	3.08627e-55		ATP5B	1.82891e-32	0.332871	0.896	0.828	2.75068e-28		ATP5G3	7.1291e-40	-0.588138	0.531	0.955	1.07222e-35		POLD4
							PGP	1.11587e-62	-0.278161	0.271	0.582	1.67828e-58		XRCC5	7.16226e-82	-0.458722	0.692	0.749	1.0772e-77		HSP90B1	2.95891e-34	0.273935	0.693	0.537	4.4502e-30		LMNB1	6.87511e-59	0.277069	0.606	0.25	1.03402e-54		RARRES3	9.61697e-32	-0.492811	0.15	0.445	1.44639e-27		DCAF13	9.85779e-40	-0.615403	0.104	0.667	1.48261e-35		KRT14
							COX17	9.12466e-62	-0.310993	0.569	0.82	1.37235e-57		NME4	2.79425e-81	0.299127	0.991	0.869	4.20255e-77		MRPL47	1.32604e-33	0.260466	0.763	0.636	1.99437e-29		CDCA2	1.11405e-58	0.261898	0.544	0.209	1.67553e-54		OLFM2	2.31079e-31	-0.314189	0.243	0.543	3.47542e-27		UQCRB	1.00146e-39	-0.454551	0.88	0.998	1.5062e-35		KRT5
							C11orf83	2.08112e-58	-0.288	0.695	0.87	3.13e-54		TECR	1.02287e-80	-0.371994	0.973	0.949	1.5384e-76		CENPF	1.45386e-33	0.405854	0.731	0.57	2.18661e-29		SMC2	1.68987e-58	0.317589	0.719	0.351	2.54157e-54		NDUFV1	4.59375e-31	0.336317	0.837	0.768	6.909e-27		ENO1	1.47893e-39	-0.617305	0.661	0.972	2.22431e-35		MGP
							LINC01133	1.31707e-56	-0.301017	0.183	0.44	1.98087e-52		HNRNPM	1.02971e-80	-0.446096	0.771	0.807	1.54869e-76		JUNB	2.29931e-33	-0.29792	0.673	0.847	3.45817e-29		HSPA2	3.87471e-58	0.399693	0.967	0.69	5.82756e-54		FGFR1	4.67716e-31	0.329194	0.393	0.194	7.03445e-27		TSPO	1.80373e-39	-0.577432	0.62	0.985	2.7128e-35		KRT6B
							SNRPG	8.13974e-56	-0.253319	0.854	0.952	1.22422e-51		PSMA5	1.17784e-80	-0.445495	0.644	0.728	1.77148e-76		ISOC2	2.66651e-33	0.274384	0.744	0.647	4.01043e-29		FTH1	2.27427e-57	-0.33927	1	0.999	3.4205e-53		LSMD1	4.94837e-31	0.34517	0.833	0.718	7.44234e-27		PRDX4	1.8747e-39	-0.618663	0.286	0.857	2.81955e-35		OPTN
							KPNA2	2.22634e-53	-0.412109	0.277	0.539	3.34841e-49		MMP7	1.22729e-80	-0.599618	0.802	0.832	1.84584e-76		HNRNPR	3.7349e-33	0.257132	0.815	0.71	5.6173e-29		KLF2	1.52664e-55	0.424604	0.783	0.442	2.29607e-51		MESP1	5.43488e-31	-0.33544	0.631	0.824	8.17405e-27		SKP1	4.33246e-39	-0.631136	0.484	0.948	6.51602e-35		SPINT1
							ATF3	1.33697e-52	0.330342	0.89	0.834	2.0108e-48		NUDC	4.43005e-80	-0.454436	0.64	0.747	6.66279e-76		DDX39A	4.00695e-33	0.281084	0.76	0.637	6.02645e-29		DDX39A	1.06907e-54	0.36536	0.925	0.63	1.60788e-50		RAN	5.91132e-31	0.286866	0.976	0.961	8.89062e-27		DYNLL1	9.17405e-39	-0.563502	0.776	0.983	1.37978e-34		SH3KBP1
							BTG1	2.78674e-52	0.259859	0.974	0.954	4.19126e-48		C9orf16	1.98957e-76	0.259105	1	0.972	2.99231e-72		RUVBL2	6.10661e-33	0.271148	0.647	0.507	9.18435e-29		PHF19	1.09498e-54	0.347827	0.817	0.467	1.64685e-50		TSTD1	9.60985e-31	-0.291371	0.796	0.926	1.44532e-26		RBM8A	1.60658e-38	-0.617852	0.474	0.936	2.4163e-34
							MALAT1	4.52465e-52	0.32412	0.995	0.996	6.80507e-48		LINC01133	7.02156e-76	0.279534	0.709	0.323	1.05604e-71		NUDC	2.40229e-32	0.251755	0.826	0.714	3.61305e-28		TMPO	3.48954e-54	0.302547	0.756	0.393	5.24827e-50		TXNDC17	1.05713e-30	0.329574	0.785	0.65	1.58993e-26		PSMA4	1.61546e-38	-0.597588	0.37	0.916	2.42965e-34
							CCDC85B	4.94107e-51	-0.260102	0.817	0.919	7.43137e-47		TXN	4.20177e-75	-0.29933	0.996	0.976	6.31946e-71		MCM4	6.07254e-32	-0.281691	0.304	0.528	9.1331e-28		DBF4	5.93536e-53	0.349941	0.99	0.842	8.92678e-49		KRT16	2.11444e-30	0.488658	0.892	0.766	3.18012e-26		SPCS1	1.67692e-38	-0.57874	0.312	0.881	2.52209e-34
							ANAPC11	1.52328e-50	-0.264708	0.679	0.868	2.29102e-46		HES4	1.48681e-74	0.270197	0.998	0.962	2.23617e-70		MT2A	1.03165e-31	0.281771	0.937	0.836	1.55161e-27		KIF22	2.78722e-52	0.347559	0.915	0.633	4.19198e-48		NENF	4.58394e-30	-0.302545	0.625	0.844	6.89424e-26		MGP	1.82665e-38	-1.2452	0.818	0.96	2.74728e-34
							DDX39A	4.45943e-50	-0.312077	0.461	0.712	6.70698e-46		CCT6A	1.60641e-74	-0.386587	0.929	0.886	2.41604e-70		DNAJA1	2.06483e-31	0.274497	0.853	0.798	3.1055e-27		CDC25B	8.81022e-52	0.28962	0.629	0.294	1.32506e-47		SSSCA1	4.77398e-30	0.320022	0.662	0.495	7.18007e-26		CTC-425F1.4	1.8689e-38	0.455019	0.229	0.039	2.81082e-34
							MTHFD2	1.13522e-48	-0.253437	0.423	0.68	1.70737e-44		MDH1	3.99668e-73	-0.437459	0.371	0.588	6.011e-69		RUVBL1	4.29344e-31	0.260484	0.719	0.604	6.45733e-27		EMC9	6.30871e-50	0.271245	0.604	0.281	9.4883e-46		ZFAS1	7.5804e-30	-0.25895	0.959	0.981	1.14009e-25		HSPB1	6.10583e-38	-0.547681	0.922	0.994	9.18317e-34
							CKB	1.15429e-47	-0.297986	0.64	0.845	1.73605e-43		ZNF706	1.41194e-71	0.268265	0.994	0.887	2.12356e-67		CCT5	6.35184e-30	0.250511	0.832	0.753	9.55317e-26		HP1BP3	4.23676e-49	0.339703	0.956	0.721	6.37209e-45		RARRES1	8.33001e-30	-0.338847	0.774	0.938	1.25283e-25		RPS8	6.93377e-38	0.279313	1	1	1.04284e-33
							TUBB4B	1.71303e-47	-0.364521	0.684	0.839	2.57639e-43		HNRNPF	5.86262e-71	-0.384112	0.852	0.831	8.81739e-67		STRA13	2.15514e-29	-0.268321	0.6	0.749	3.24133e-25		FTL	5.10874e-49	-0.295937	1	0.999	7.68354e-45		RBP7	1.64963e-29	-0.286009	0.798	0.93	2.48104e-25		SOD1	7.69905e-38	-0.59767	0.531	0.953	1.15794e-33
							HN1	1.3543e-46	-0.268854	0.878	0.938	2.03686e-42		MGP	3.74869e-70	-0.89548	0.991	0.949	5.63803e-66		CACYBP	1.10159e-28	0.251798	0.854	0.805	1.6568e-24		KIAA0101	7.86741e-48	0.349737	0.954	0.654	1.18326e-43		CASC8	1.75701e-29	-0.305276	0.2	0.485	2.64255e-25		S100A2	1.67115e-37	-0.534367	0.885	0.991	2.51341e-33
							GGCT	1.8977e-46	-0.250299	0.735	0.881	2.85414e-42		HNRNPU	5.30991e-70	-0.45247	0.794	0.801	7.9861e-66		CENPW	1.87329e-28	0.25664	0.564	0.409	2.81743e-24		PPIH	1.1538e-47	0.318859	0.927	0.647	1.73531e-43		SELM	5.07359e-29	-0.300325	0.683	0.872	7.63069e-25		ALDOA	1.82829e-37	-0.539544	0.74	0.991	2.74974e-33
							HDGF	2.65425e-46	-0.272643	0.703	0.871	3.99199e-42		YWHAG	1.32455e-68	0.279099	0.987	0.801	1.99212e-64		ID1	2.65266e-28	-0.277081	0.489	0.713	3.9896e-24		DTYMK	3.96228e-47	0.288378	0.773	0.428	5.95926e-43		SLC3A2	5.11826e-29	0.352863	0.759	0.634	7.69786e-25		TMCO1	2.22377e-37	-0.537435	0.214	0.809	3.34455e-33
							KIF5B	3.46111e-46	-0.270815	0.657	0.831	5.2055e-42		MYL6	1.77005e-66	-0.288449	0.995	0.973	2.66216e-62		APOE	9.3327e-27	-0.402249	0.428	0.621	1.40364e-22		TAGLN2	1.53832e-46	0.258387	1	0.981	2.31363e-42		FKBP2	6.20104e-28	0.348492	0.772	0.673	9.32637e-24		TECR	2.63191e-37	-0.579897	0.578	0.966	3.95839e-33
							FOS	9.67488e-43	0.30049	0.924	0.877	1.4551e-38		PGK1	4.54189e-66	-0.397143	0.722	0.751	6.831e-62		IGFBP3	1.34961e-26	-0.333815	0.544	0.728	2.02981e-22		DTX2	7.99552e-46	0.304816	0.696	0.379	1.20253e-41		YWHAQ	8.93557e-28	0.286354	0.924	0.888	1.34391e-23		PSMD2	3.70336e-37	-0.569169	0.219	0.785	5.56985e-33
							DEFB1	4.31823e-42	0.4355	0.701	0.609	6.49462e-38		PRRC2C	9.29827e-66	-0.340417	0.966	0.938	1.39846e-61		TOMM40	2.56651e-26	0.261136	0.731	0.634	3.86002e-22		TM4SF1	1.78292e-45	0.271147	0.996	0.983	2.68151e-41		SNHG8	9.4441e-28	-0.28562	0.792	0.93	1.42039e-23		HSPD1	4.62626e-37	-0.627945	0.583	0.957	6.9579e-33
							TOMM40	4.36727e-42	-0.252019	0.463	0.702	6.56837e-38		PDIA6	1.08665e-65	-0.408816	0.72	0.755	1.63432e-61		NUF2	7.67655e-24	0.309705	0.459	0.318	1.15455e-19		KIF5B	1.96599e-45	0.337062	0.962	0.776	2.95685e-41		PEBP1	1.18241e-27	0.25236	0.961	0.942	1.77834e-23		ATPIF1	4.73012e-37	-0.586995	0.349	0.878	7.11409e-33
							CTGF	4.4073e-38	0.353368	0.514	0.374	6.62859e-34		PKM	2.02447e-65	-0.336102	0.974	0.932	3.04481e-61		HMGB2	1.03361e-18	0.298873	0.663	0.571	1.55455e-14		UBALD2	2.70688e-45	0.266217	0.625	0.31	4.07114e-41		NDUFC2	2.03709e-27	0.267606	0.907	0.875	3.06378e-23		UCHL1	4.98106e-37	-0.617306	0.406	0.905	7.49151e-33
							KLF2	5.65397e-38	-0.301988	0.304	0.521	8.50356e-34		CCT7	3.69079e-65	-0.401822	0.695	0.743	5.55094e-61		DSP	4.79674e-18	0.274131	0.851	0.842	7.2143e-14		RAN	2.77794e-45	0.255317	0.998	0.959	4.17802e-41		IGFBP5	3.78066e-27	0.299981	0.115	0.024	5.68612e-23		COX6A1	6.22581e-37	-0.526254	0.219	0.807	9.36361e-33
							CD14	1.27643e-32	0.250917	0.395	0.26	1.91975e-28		MAGOH	5.93425e-65	-0.363368	0.918	0.874	8.92511e-61		KRT81	1.62724e-15	-0.748152	0.143	0.27	2.44737e-11		SKA2	4.44923e-45	0.308788	0.81	0.492	6.69165e-41		HSPB3	5.978e-27	0.352787	0.304	0.137	8.99092e-23		PPIH	9.54498e-37	-0.586072	0.151	0.691	1.43556e-32
							HSPA5	8.25511e-30	0.299951	0.672	0.606	1.24157e-25		SRSF7	6.56688e-65	-0.40825	0.745	0.777	9.87659e-61		CKS2	8.38659e-15	0.387266	0.807	0.818	1.26134e-10		RBM8A	2.21073e-43	0.270511	0.99	0.913	3.32494e-39		RNF181	1.52455e-26	0.29567	0.633	0.466	2.29292e-22		TALDO1	2.19447e-36	-0.583593	0.469	0.938	3.30048e-32
							STAU2	9.31562e-29	0.272194	0.694	0.635	1.40107e-24		HSPA1A	9.81195e-65	-0.447537	0.427	0.597	1.47572e-60		RARRES3	2.43585e-14	-0.277582	0.288	0.444	3.66352e-10		MT2A	4.30245e-43	0.455052	0.988	0.838	6.47088e-39		PA2G4	4.94458e-26	0.286898	0.892	0.84	7.43666e-22		NDUFV1	2.23538e-36	-0.509666	0.214	0.795	3.36202e-32
							KRT81	1.1937e-26	-0.710245	0.135	0.285	1.79533e-22		COPE	4.02229e-64	-0.386287	0.798	0.808	6.04952e-60		MGP	8.65226e-10	-0.435569	0.979	0.951	1.3013e-05		HNRNPDL	5.71258e-42	0.302117	0.967	0.808	8.59172e-38		MT-ND4L	7.1512e-26	-0.265529	0.857	0.948	1.07554e-21		SNRPE	2.28648e-36	-0.515088	0.609	0.96	3.43887e-32
							RP3-395M20.12	1.48781e-23	0.266724	0.514	0.429	2.23767e-19		HSPA5	2.07623e-63	-0.545901	0.518	0.64	3.12265e-59		OASL	7.37341e-07	-0.252393	0.156	0.235	0.0110896		MRPL51	7.36594e-41	0.259285	0.996	0.902	1.10784e-36		AKR1A1	2.00231e-25	-0.282231	0.44	0.71	3.01147e-21		IFITM3	2.39294e-36	-0.564969	0.667	0.984	3.59898e-32
							ID1	1.76209e-21	0.270501	0.709	0.671	2.65019e-17		RARRES1	2.45671e-63	-0.517312	0.972	0.916	3.6949e-59									DUT	1.55856e-40	0.30108	0.977	0.814	2.34408e-36		ATF3	4.6629e-25	-0.343248	0.677	0.862	7.01299e-21		CYC1	2.63345e-36	-0.572406	0.521	0.941	3.96071e-32
							RGS5	9.4659e-08	0.443931	0.372	0.329	0.00142367		PSMD4	3.60445e-63	-0.381961	0.795	0.806	5.42109e-59									NUDT1	3.50458e-40	0.291321	0.904	0.643	5.27089e-36		IL32	2.1787e-24	-0.286791	0.108	0.352	3.27676e-20		NAPRT1	2.86232e-36	-0.585842	0.26	0.82	4.30493e-32
														EIF3A	6.40297e-63	-0.390041	0.819	0.825	9.63007e-59									DCAF7	6.20584e-40	0.254586	0.681	0.374	9.33359e-36		TUFM	2.75118e-24	0.281149	0.876	0.832	4.13778e-20		COX6B1	3.18997e-36	-0.48177	0.771	0.99	4.79771e-32
														TMEM238	7.72115e-63	0.270512	0.992	0.853	1.16126e-58									HMG20B	4.03749e-38	0.271895	0.758	0.456	6.07239e-34		CAV1	3.79007e-24	0.392191	0.466	0.302	5.70027e-20		VPS28	3.4769e-36	-0.573576	0.495	0.95	5.22925e-32
														HSPA2	1.00542e-62	-0.488419	0.679	0.72	1.51216e-58									VPS28	4.55684e-38	0.252321	0.996	0.929	6.85349e-34		TMEM179B	7.75476e-24	0.275175	0.82	0.714	1.16632e-19		GSDMD	4.48914e-36	-0.506514	0.115	0.671	6.75167e-32
														SFPQ	1.08291e-62	-0.404352	0.758	0.773	1.6287e-58									GTF3C5	8.64079e-38	0.267299	0.642	0.35	1.29957e-33		HOOK2	8.98757e-24	0.267794	0.852	0.758	1.35173e-19		RBX1	6.45441e-36	-0.54193	0.339	0.89	9.70743e-32
														CD81	2.13376e-62	-0.336305	0.924	0.875	3.20917e-58									CDC42EP1	2.89896e-37	0.255452	0.719	0.416	4.36004e-33		NDUFS2	1.17456e-23	0.271102	0.846	0.75	1.76654e-19		CCT3	6.67828e-36	-0.547644	0.745	0.989	1.00441e-31
														PSMB7	2.28069e-62	-0.387664	0.766	0.797	3.43016e-58									F12	1.45782e-36	0.302061	0.856	0.633	2.19257e-32		MALAT1	1.28884e-23	0.404944	1	0.995	1.93842e-19		C19orf70	1.64509e-35	-0.554254	0.505	0.943	2.47422e-31
														TMBIM6	6.02131e-62	-0.402072	0.671	0.721	9.05605e-58									ANP32B	1.67957e-35	0.256751	0.99	0.891	2.52607e-31		ATP5I	1.59017e-23	0.255596	0.963	0.958	2.39161e-19		ARF4	2.04869e-35	-0.556916	0.141	0.683	3.08123e-31
														EIF6	7.82199e-62	-0.395251	0.721	0.762	1.17643e-57									HNRNPA3	6.9707e-35	0.267105	0.965	0.814	1.04839e-30		CCT7	1.67687e-23	0.285046	0.822	0.728	2.52201e-19		RPL35	3.35866e-35	-0.280356	1	1	5.05143e-31
														JUN	4.09633e-61	-0.445549	0.951	0.912	6.16089e-57									BCL2L12	7.47028e-35	0.269649	0.796	0.522	1.12353e-30		PTP4A2	1.78049e-23	-0.265904	0.443	0.688	2.67786e-19		PPIA	3.62604e-35	-0.418589	0.943	0.998	5.45357e-31
														CLTA	1.00789e-60	-0.345855	0.896	0.848	1.51586e-56									MARCKS	8.80595e-35	0.278189	0.985	0.865	1.32441e-30		ARL2	1.86616e-23	0.262414	0.783	0.676	2.8067e-19		PSME2	5.03749e-35	-0.5367	0.161	0.723	7.57638e-31
														UBE2S	5.23417e-60	0.347612	0.993	0.846	7.87219e-56									BTG1	1.07384e-34	-0.370584	0.962	0.958	1.61505e-30		SRM	1.93342e-23	-0.28478	0.646	0.829	2.90786e-19		NDUFB6	5.20952e-35	-0.492206	0.109	0.651	7.83511e-31
														PRDX6	1.28803e-59	-0.276456	0.986	0.962	1.93719e-55									CLIC1	4.74512e-34	0.263237	0.971	0.822	7.13666e-30		TMBIM6	2.17708e-23	0.283276	0.822	0.703	3.27433e-19		PSMA3	8.34128e-35	-0.567802	0.286	0.841	1.25453e-30
														CD9	1.8364e-59	-0.388237	0.719	0.743	2.76194e-55									RNASEH2A	2.60178e-33	0.253742	0.927	0.669	3.91308e-29		RTFDC1	3.94801e-23	0.308722	0.607	0.459	5.93781e-19		CIB1	8.87222e-35	-0.53916	0.193	0.755	1.33438e-30
														MYBL2	3.70286e-59	0.252972	0.801	0.442	5.56911e-55									DSP	8.42572e-30	0.261809	0.954	0.833	1.26723e-25		BANF1	4.61065e-23	0.264908	0.924	0.878	6.93442e-19		GSTO1	9.86337e-35	-0.503079	0.099	0.635	1.48345e-30
														USP14	4.15408e-59	-0.397125	0.719	0.75	6.24773e-55									KHDRBS1	9.51484e-30	0.254304	0.921	0.746	1.43103e-25		PRDX5	4.6627e-23	0.269116	0.926	0.904	7.0127e-19		LSM7	1.17993e-34	-0.508475	0.688	0.966	1.77462e-30
														VPS28	6.46753e-59	-0.304741	0.968	0.928	9.72717e-55									CCDC34	1.6222e-29	0.252477	0.912	0.678	2.43979e-25		C12orf57	1.08889e-22	-0.250126	0.753	0.912	1.63769e-18		NDUFS2	1.35037e-34	-0.553736	0.219	0.778	2.03096e-30
														PPA1	1.24334e-58	-0.308909	0.976	0.93	1.86998e-54									CNIH4	1.84751e-28	0.255316	0.881	0.682	2.77865e-24		GNG11	1.23818e-22	0.414994	0.351	0.189	1.86222e-18		PSME1	1.58387e-34	-0.534585	0.214	0.765	2.38213e-30
														YWHAB	1.28745e-58	-0.313168	0.96	0.918	1.93633e-54									SFN	8.51837e-28	0.292891	0.85	0.643	1.28116e-23		MARCKS	4.49239e-22	-0.282375	0.74	0.888	6.75656e-18		SFN	1.68128e-34	-0.58856	0.151	0.68	2.52865e-30
														PTGES3	1.59013e-58	-0.345341	0.911	0.884	2.39155e-54									CALML5	1.50765e-25	0.258063	0.954	0.776	2.2675e-21		STRA13	1.11937e-21	-0.268141	0.527	0.745	1.68353e-17		RPS12	2.49731e-34	0.271851	1	1	3.75595e-30
														DSP	3.26364e-58	-0.431719	0.881	0.836	4.90852e-54									CRABP2	1.93379e-23	0.279019	0.892	0.713	2.90843e-19		BSG	1.61761e-21	0.301685	0.824	0.797	2.43288e-17		CCT8	2.93338e-34	-0.531639	0.302	0.844	4.41181e-30
														UCHL1	1.83424e-57	-0.348367	0.926	0.88	2.75869e-53									CEBPD	1.67727e-22	-0.316991	0.931	0.904	2.52261e-18		UBE2C	2.62883e-21	-0.357944	0.412	0.661	3.95376e-17		PSMA7	3.18012e-34	-0.515877	0.771	0.99	4.7829e-30
														MAL2	1.23128e-56	0.254119	0.988	0.825	1.85185e-52									NEAT1	1.23869e-18	-0.253757	0.996	0.972	1.86299e-14		FBXO2	4.68474e-21	-0.250188	0.269	0.51	7.04585e-17		TRAPPC6A	3.34045e-34	-0.530814	0.208	0.762	5.02404e-30
														SLC3A2	2.14916e-56	-0.428863	0.558	0.661	3.23233e-52									FBXO32	8.21565e-15	-0.282207	0.358	0.498	1.23563e-10		PLP2	4.72445e-21	-0.262659	0.466	0.701	7.10558e-17		CLDN7	3.78344e-34	-0.502822	0.234	0.816	5.6903e-30
														PSMC4	8.5706e-56	-0.397791	0.424	0.581	1.28902e-51									AARD	8.53956e-15	-0.288997	0.977	0.947	1.28435e-10		DDRGK1	6.43682e-21	0.286515	0.566	0.409	9.68097e-17		PSMB5	5.16405e-34	-0.54979	0.453	0.93	7.76673e-30
														HIST1H4C	1.2725e-55	0.256975	0.972	0.723	1.91385e-51									KRT16	2.01853e-14	0.255555	0.908	0.764	3.03586e-10		VAMP8	7.76343e-21	0.252148	0.787	0.716	1.16762e-16		RNASEH2A	5.82598e-34	-0.631477	0.182	0.71	8.76228e-30
														RUVBL1	1.38586e-55	-0.398095	0.538	0.636	2.08434e-51									RP3-395M20.12	3.72713e-14	-0.277694	0.325	0.46	5.6056e-10		SMIM7	1.2652e-20	0.291483	0.705	0.616	1.90286e-16		NASP	6.29195e-34	-0.621431	0.271	0.793	9.46309e-30
														KRT10	1.97119e-55	0.260085	0.993	0.845	2.96466e-51									CITED2	1.21133e-13	-0.280231	0.435	0.538	1.82184e-09		ID2	2.81997e-20	0.325464	0.833	0.784	4.24123e-16		NDUFA1	7.4727e-34	-0.54943	0.302	0.865	1.12389e-29
														PSMD13	2.48105e-55	-0.389776	0.561	0.639	3.73149e-51									APOE	2.17072e-08	-0.372657	0.562	0.595	0.000326476		EIF6	3.95727e-20	0.26228	0.822	0.75	5.95174e-16		RNH1	1.11858e-33	-0.48596	0.24	0.811	1.68235e-29
														ATP5B	2.73779e-55	-0.351707	0.867	0.828	4.11763e-51									IGFBP3	1.07131e-07	-0.261366	0.683	0.703	0.00161125		SLPI	1.76455e-19	-0.349815	0.516	0.771	2.65388e-15		ADRM1	1.17046e-33	-0.532319	0.25	0.805	1.76038e-29
														EIF4A2	3.42317e-55	-0.361976	0.866	0.834	5.14844e-51																KRT23	2.32425e-19	-0.277891	0.458	0.677	3.49567e-15		MT-ND1	1.21099e-33	0.344814	1	0.998	1.82134e-29
														PSME1	1.51705e-54	-0.371595	0.739	0.747	2.28165e-50																N4BP2L2	3.20489e-19	0.257568	0.731	0.619	4.82015e-15		MT-CO1	1.61074e-33	0.279729	1	0.998	2.42256e-29
														HNRNPR	4.22899e-54	-0.375989	0.706	0.73	6.3604e-50																ARPC3	3.747e-19	0.265256	0.861	0.827	5.63549e-15		RPS2	2.83384e-33	0.250908	1	1	4.2621e-29
														CD59	4.33548e-54	-0.343848	0.924	0.884	6.52056e-50																CITED4	4.15283e-19	0.317871	0.983	0.972	6.24585e-15		PSMD13	3.04089e-33	-0.509589	0.12	0.646	4.57349e-29
														HMGN3	1.02196e-53	0.25571	0.979	0.786	1.53702e-49																ELF5	4.54385e-19	0.343186	0.657	0.542	6.83395e-15		CYCS	3.29705e-33	-0.558295	0.359	0.879	4.95876e-29
														MDH2	1.35597e-53	-0.289302	0.962	0.921	2.03937e-49																GAS1	6.51952e-19	0.367681	0.508	0.356	9.80536e-15		DDX39A	4.07812e-33	-0.557675	0.156	0.674	6.13349e-29
														SF3B1	2.27795e-53	-0.397513	0.524	0.617	3.42604e-49																MYEOV	6.75888e-19	0.267221	0.748	0.618	1.01653e-14		PSMA5	4.93028e-33	-0.511115	0.193	0.734	7.41514e-29
														NME1	3.52478e-53	-0.31842	0.955	0.904	5.30127e-49																KHDRBS3	8.29898e-19	0.29732	0.657	0.521	1.24817e-14		H2AFZ	9.59321e-33	-0.535112	0.844	0.984	1.44282e-28
														CCT2	6.00019e-53	-0.36389	0.741	0.747	9.02429e-49																MDH1	1.42644e-18	0.295659	0.668	0.544	2.14537e-14		SSR4	1.19128e-32	-0.535174	0.474	0.944	1.79168e-28
														EBNA1BP2	1.23046e-52	-0.370635	0.84	0.817	1.85061e-48																RGS5	1.5834e-18	-0.409094	0.145	0.356	2.38144e-14		FAU	1.2742e-32	-0.331326	0.995	0.999	1.9164e-28
														S100A11	1.78682e-52	-0.268382	0.999	0.987	2.68738e-48																MAL2	1.59263e-18	-0.251965	0.727	0.862	2.39531e-14		RAN	1.44605e-32	-0.507756	0.698	0.972	2.17487e-28
														TUBA1A	2.25166e-52	-0.416775	0.898	0.843	3.38649e-48																ELP5	2.24986e-18	0.266418	0.64	0.539	3.38379e-14		CLTA	1.64026e-32	-0.523429	0.333	0.875	2.46695e-28
														IER2	8.20179e-52	-0.34411	0.982	0.924	1.23355e-47																AMD1	2.63954e-18	0.272085	0.79	0.723	3.96987e-14		NDUFA12	1.8453e-32	-0.488138	0.203	0.754	2.77533e-28
														ACTG1	1.16677e-51	-0.279213	0.999	0.992	1.75483e-47																ACSL3	2.97345e-18	0.273869	0.516	0.371	4.47206e-14		CALML5	2.97689e-32	-0.582436	0.302	0.81	4.47725e-28
														PSME2	2.84608e-51	-0.379394	0.676	0.708	4.28051e-47																CAV2	3.44245e-18	0.305258	0.462	0.318	5.17745e-14		PSMB6	3.09185e-32	-0.515542	0.203	0.749	4.65014e-28
														EIF4A3	4.66646e-51	-0.35144	0.224	0.435	7.01836e-47																TMEM205	8.11804e-18	0.287141	0.518	0.386	1.22095e-13		RPA3	3.23135e-32	-0.549658	0.292	0.825	4.85995e-28
														MRPL13	4.04828e-50	-0.333488	0.761	0.771	6.08862e-46																ANKRD1	2.11777e-17	0.291546	0.351	0.207	3.18513e-13		PSMC5	4.60824e-32	-0.509482	0.177	0.705	6.9308e-28
														ECHS1	5.4687e-50	-0.344643	0.734	0.749	8.22493e-46																PLTP	3.82443e-17	0.263335	0.484	0.353	5.75194e-13		MRPL27	6.05738e-32	-0.497999	0.193	0.733	9.11029e-28
														HNRNPA3	1.71777e-49	-0.345551	0.864	0.821	2.58353e-45																DHCR7	1.37646e-16	0.306301	0.516	0.387	2.07019e-12		SRSF7	1.21944e-31	-0.54451	0.26	0.791	1.83403e-27
														TMCO1	2.0562e-49	-0.334774	0.808	0.784	3.09253e-45																FOXC1	4.92091e-16	0.285383	0.72	0.653	7.40105e-12		SET	1.56778e-31	0.537855	0.948	0.975	2.35794e-27
														RNH1	3.56523e-49	-0.339025	0.805	0.788	5.3621e-45																CRYAB	8.0265e-16	0.266458	0.874	0.85	1.20719e-11		PARK7	1.62771e-31	-0.518126	0.526	0.947	2.44808e-27
														PSMB5	3.6258e-49	-0.282745	0.965	0.904	5.45321e-45																FOS	9.78988e-16	-0.254711	0.787	0.897	1.4724e-11		S100A13	1.64174e-31	-0.433684	0.844	0.993	2.46918e-27
														RBM8A	1.03971e-48	-0.290251	0.968	0.911	1.56372e-44																RGCC	1.5293e-15	0.286625	0.397	0.261	2.30007e-11		RAB2A	1.66885e-31	-0.544953	0.422	0.905	2.50995e-27
														COPB1	1.4776e-48	-0.373385	0.313	0.488	2.22231e-44																DDX39A	1.73822e-15	0.287725	0.725	0.649	2.61428e-11		EIF3E	3.83032e-31	-0.437332	0.839	0.995	5.76081e-27
														PHB	5.38587e-48	-0.33508	0.856	0.815	8.10036e-44																SFRP1	1.98974e-15	0.290043	0.742	0.668	2.99256e-11		ATP5C1	4.00299e-31	-0.492745	0.297	0.838	6.02049e-27
														SUPT16H	1.95186e-47	-0.37778	0.482	0.593	2.9356e-43																CHPT1	2.62145e-15	0.267314	0.488	0.373	3.94266e-11		MT-ND2	4.49028e-31	0.377953	1	0.997	6.75338e-27
														NAPRT1	2.10107e-47	-0.335924	0.815	0.798	3.16002e-43																CORO1B	3.21384e-15	0.255121	0.523	0.408	4.83362e-11		FDPS	5.48727e-31	-0.569985	0.37	0.851	8.25285e-27
														DAD1	4.29147e-47	-0.323297	0.854	0.815	6.45437e-43																ADIRF	1.28965e-14	0.275757	0.427	0.305	1.93963e-10		EIF1	5.67983e-31	-0.40024	0.906	0.998	8.54246e-27
														RAN	4.38031e-47	-0.263355	0.993	0.957	6.58799e-43																ECH1	1.40231e-14	0.270126	0.675	0.614	2.10907e-10		TPI1	6.75317e-31	-0.480289	0.672	0.972	1.01568e-26
														SRSF3	8.10399e-47	-0.296578	0.946	0.897	1.21884e-42																CD59	7.45147e-14	0.251669	0.915	0.888	1.1207e-09		IER2	8.78866e-31	-0.567672	0.562	0.946	1.32181e-26
														PSMD7	1.00375e-46	-0.360742	0.627	0.665	1.50964e-42																RNASEH2A	3.81997e-12	0.295854	0.729	0.688	5.74524e-08		PRDX5	9.1042e-31	-0.512504	0.448	0.923	1.36927e-26
														LTF	3.22048e-46	-0.790067	0.905	0.834	4.84361e-42																CENPF	2.45694e-10	-0.264134	0.427	0.609	3.69523e-06		NDUFS6	1.26904e-30	-0.476214	0.641	0.964	1.90863e-26
														SRRM1	5.3854e-46	-0.327729	0.781	0.764	8.09965e-42																SGK1	5.35146e-10	0.264519	0.586	0.519	8.0486e-06		POLR2H	1.31943e-30	-0.479985	0.266	0.79	1.98442e-26
														CACYBP	7.29407e-46	-0.327631	0.848	0.806	1.09703e-41																KLK11	1.29219e-06	0.259989	0.662	0.65	0.0194346		PSMD4	1.32592e-30	-0.485362	0.266	0.824	1.99418e-26
														CCT4	1.27285e-45	-0.336976	0.713	0.721	1.91437e-41																							CCT7	2.12579e-30	-0.463268	0.214	0.755	3.19719e-26
														PSMA1	3.34726e-45	-0.335431	0.756	0.751	5.03428e-41																							RPS27L	2.67896e-30	-0.474373	0.203	0.726	4.02916e-26
														IK	3.46816e-44	-0.353538	0.496	0.584	5.21612e-40																							EIF4A1	3.19429e-30	-0.560702	0.51	0.949	4.80421e-26
														NAP1L1	4.64421e-44	-0.292141	0.94	0.887	6.98489e-40																							U2AF1	3.86482e-30	-0.473092	0.25	0.788	5.81269e-26
														DDX24	7.39159e-44	-0.342865	0.679	0.697	1.1117e-39																							NDUFB4	4.35161e-30	-0.478898	0.536	0.956	6.54481e-26
														TMEM59	8.12969e-44	-0.340435	0.707	0.708	1.22271e-39																							DHPS	4.96874e-30	-0.468592	0.203	0.72	7.47298e-26
														AP2M1	1.42326e-43	-0.288602	0.884	0.844	2.14058e-39																							TMEM59	5.12412e-30	-0.475239	0.203	0.726	7.70667e-26
														NUDT5	1.62285e-43	-0.320133	0.718	0.712	2.44077e-39																							CDC123	6.3443e-30	-0.452693	0.115	0.62	9.54183e-26
														EMC2	2.99507e-43	-0.333879	0.272	0.445	4.50459e-39																							DDX5	6.47106e-30	-0.523864	0.312	0.836	9.73248e-26
														COPB2	3.64522e-43	-0.35567	0.368	0.504	5.48242e-39																							CRABP2	6.99112e-30	-0.570258	0.245	0.746	1.05146e-25
														ANP32E	3.76199e-42	-0.414505	0.824	0.777	5.65803e-38																							ECH1	8.87322e-30	-0.43955	0.125	0.637	1.33453e-25
														PRKDC	4.45959e-42	-0.25384	0.988	0.952	6.70723e-38																							NDUFB5	1.1401e-29	-0.419624	0.125	0.636	1.71471e-25
														MRPL47	6.84832e-42	-0.329192	0.621	0.661	1.02999e-37																							MDH1	1.17217e-29	-0.466029	0.089	0.571	1.76294e-25
														ATP5C1	1.44476e-41	-0.286958	0.848	0.814	2.17292e-37																							TRIM28	2.0802e-29	-0.443624	0.214	0.747	3.12861e-25
														ARF4	1.60505e-41	-0.347746	0.635	0.669	2.414e-37																							NDUFA2	2.35784e-29	-0.43664	0.224	0.751	3.54619e-25
														HADHB	1.74868e-41	-0.337834	0.388	0.515	2.63002e-37																							NDUFB10	2.49109e-29	-0.480692	0.5	0.936	3.7466e-25
														TUFM	5.72501e-41	-0.295942	0.884	0.827	8.61042e-37																							SCAND1	2.85915e-29	-0.436663	0.24	0.779	4.30015e-25
														EIF3D	6.18613e-41	-0.310424	0.804	0.763	9.30393e-37																							CD81	3.47917e-29	-0.507305	0.391	0.901	5.23267e-25
														LDHA	8.84668e-41	-0.305466	0.96	0.907	1.33054e-36																							HMGB1	3.96723e-29	-0.510572	0.984	0.994	5.96671e-25
														MRPL15	2.37604e-40	-0.258452	0.947	0.879	3.57356e-36																							RPS9	4.89924e-29	-0.274451	1	1	7.36845e-25
														PDHA1	2.4907e-40	-0.328462	0.316	0.467	3.74602e-36																							MRPL51	4.95853e-29	-0.495497	0.469	0.927	7.45764e-25
														PSMB6	4.75779e-40	-0.338652	0.725	0.731	7.15572e-36																							ISG15	5.35576e-29	-0.736748	0.333	0.84	8.05506e-25
														BZW2	5.57798e-40	-0.320738	0.745	0.726	8.38928e-36																							MGMT	7.32508e-29	-0.476886	0.245	0.775	1.10169e-24
														PSMC5	7.59299e-40	-0.331786	0.692	0.686	1.14199e-35																							EDF1	7.95991e-29	-0.465906	0.547	0.946	1.19717e-24
														VAPA	8.17616e-40	-0.257325	0.962	0.903	1.22969e-35																							SPINT2	1.06959e-28	-0.488035	0.38	0.881	1.60866e-24
														GNL3	8.59493e-40	-0.320116	0.729	0.714	1.29268e-35																							NDUFS7	1.24703e-28	-0.453092	0.219	0.741	1.87554e-24
														MGMT	9.64859e-40	-0.30096	0.774	0.754	1.45115e-35																							EPRS	1.31861e-28	-0.500675	0.312	0.823	1.9832e-24
														UBXN4	1.51457e-39	-0.301061	0.755	0.741	2.27792e-35																							POLR2K	2.57109e-28	-0.492761	0.406	0.887	3.86691e-24
														TPR	2.81442e-39	-0.325726	0.772	0.741	4.23288e-35																							NDUFA13	2.66554e-28	-0.415898	0.12	0.606	4.00896e-24
														BCLAF1	3.56466e-39	-0.329445	0.719	0.708	5.36125e-35																							POLR2G	4.0317e-28	-0.442058	0.141	0.633	6.06368e-24
														FMO2	3.98844e-39	-0.469294	0.368	0.499	5.99861e-35																							UBE2T	4.63844e-28	-0.462824	0.104	0.566	6.97621e-24
														ARPC3	3.99124e-39	-0.295615	0.88	0.821	6.00283e-35																							ECHS1	4.69385e-28	-0.399944	0.24	0.765	7.05956e-24
														RSL1D1	1.35223e-38	-0.283049	0.867	0.819	2.03375e-34																							EXOSC4	5.06983e-28	-0.446592	0.266	0.796	7.62502e-24
														VCP	1.70906e-38	-0.343009	0.548	0.596	2.57043e-34																							UBA52	5.10127e-28	-0.300412	0.995	1	7.67231e-24
														THRAP3	2.21041e-38	-0.318436	0.558	0.606	3.32446e-34																							SLPI	7.40331e-28	-0.680647	0.271	0.767	1.11346e-23
														MORF4L2	2.77836e-38	-0.322093	0.631	0.657	4.17866e-34																							SAA1	1.0692e-27	-0.942323	0.5	0.836	1.60808e-23
														ATF3	5.27823e-38	-0.381122	0.916	0.834	7.93846e-34																							DCTPP1	1.07337e-27	-0.470999	0.234	0.737	1.61435e-23
														DDOST	6.05387e-38	-0.316551	0.62	0.635	9.10501e-34																							IK	1.08889e-27	-0.442584	0.115	0.587	1.63769e-23
														HNRNPH3	6.20858e-38	-0.343679	0.587	0.624	9.3377e-34																							NUDT5	1.30616e-27	-0.400416	0.219	0.73	1.96447e-23
														PSMD11	7.6349e-38	-0.343261	0.611	0.627	1.14829e-33																							JUNB	1.41649e-27	-0.532645	0.354	0.838	2.1304e-23
														PA2G4	1.39509e-37	-0.285371	0.904	0.834	2.09822e-33																							HNRNPA2B1	1.5644e-27	-0.525404	0.625	0.957	2.35285e-23
														PNN	1.69194e-37	-0.325535	0.505	0.575	2.54468e-33																							C14orf2	1.74716e-27	-0.440209	0.536	0.938	2.62773e-23
														HADHA	2.0083e-37	-0.306432	0.755	0.73	3.02049e-33																							CD59	2.1075e-27	-0.467761	0.448	0.906	3.16968e-23
														GTPBP4	9.88055e-37	-0.327431	0.569	0.608	1.48603e-32																							MTX1	3.13025e-27	-0.420172	0.141	0.628	4.70789e-23
														NQO1	1.89166e-36	-0.318021	0.659	0.659	2.84506e-32																							PFDN2	3.20208e-27	-0.462364	0.578	0.952	4.81592e-23
														NDUFV1	3.90408e-36	-0.292335	0.812	0.767	5.87174e-32																							RUVBL1	3.44544e-27	-0.447615	0.156	0.638	5.18194e-23
														FXR1	9.50983e-36	-0.326617	0.652	0.656	1.43028e-31																							PRDX6	4.45709e-27	-0.454737	0.646	0.977	6.70346e-23
														YWHAQ	1.14111e-35	-0.262738	0.945	0.882	1.71623e-31																							SEC61G	4.46091e-27	-0.447177	0.62	0.96	6.70921e-23
														CLDN7	3.37274e-35	-0.289611	0.845	0.786	5.0726e-31																							GTF3A	4.51234e-27	0.39543	0.99	0.985	6.78656e-23
														DYNC1I2	3.50426e-35	-0.272674	0.911	0.843	5.27041e-31																							LDHA	4.80992e-27	-0.491962	0.484	0.931	7.23412e-23
														HLA-C	8.47009e-35	-0.301705	0.825	0.757	1.2739e-30																							RPL38	5.15167e-27	-0.352838	0.896	0.998	7.74811e-23
														MRPL3	1.85873e-34	-0.29864	0.685	0.683	2.79554e-30																							ATP6V0B	5.58135e-27	-0.46237	0.625	0.961	8.39435e-23
														C1QBP	2.23117e-34	-0.282053	0.841	0.792	3.35567e-30																							PSMC3	7.22802e-27	-0.489354	0.328	0.812	1.08709e-22
														LARS	4.90591e-34	-0.313517	0.616	0.63	7.37848e-30																							PPA1	7.64731e-27	-0.4693	0.599	0.949	1.15016e-22
														PDIA3	8.02765e-34	-0.321375	0.512	0.559	1.20736e-29																							NIT2	8.09686e-27	-0.417501	0.177	0.678	1.21777e-22
														TMEM50A	8.7061e-34	-0.292296	0.727	0.713	1.3094e-29																							TSEN34	8.97301e-27	-0.394508	0.198	0.699	1.34954e-22
														MT-ND6	1.37309e-33	-0.384608	0.549	0.58	2.06513e-29																							ID3	1.35965e-26	-0.570971	0.594	0.922	2.04492e-22
														PSMD12	1.99405e-33	-0.300191	0.358	0.479	2.99906e-29																							SNRPF	1.43999e-26	-0.467394	0.427	0.89	2.16575e-22
														ESD	2.13448e-33	-0.301269	0.414	0.513	3.21026e-29																							NDUFAB1	1.48353e-26	-0.434273	0.365	0.862	2.23123e-22
														TACSTD2	2.57167e-33	-0.307679	0.886	0.822	3.8678e-29																							DNAJC8	1.60515e-26	-0.372261	0.13	0.613	2.41414e-22
														SMC3	2.6392e-33	-0.309943	0.524	0.574	3.96936e-29																							MRPS21	1.82576e-26	-0.425737	0.63	0.968	2.74595e-22
														ARPC5	5.66034e-33	-0.289044	0.778	0.733	8.51315e-29																							PHLDA2	1.83139e-26	-0.51745	0.536	0.912	2.75441e-22
														PPM1G	1.16253e-32	-0.253907	0.92	0.842	1.74845e-28																							LTF	2.04037e-26	-0.883279	0.458	0.859	3.06871e-22
														NIT2	1.22196e-32	-0.302891	0.667	0.659	1.83783e-28																							CDKN2A	2.39625e-26	-0.445351	0.672	0.962	3.60396e-22
														HMGB1	1.74377e-32	-0.254852	0.998	0.993	2.62263e-28																							NDUFB11	2.61851e-26	-0.452163	0.542	0.939	3.93824e-22
														HSP90B1	1.89216e-32	-0.336209	0.518	0.567	2.84581e-28																							ARPC5	2.72537e-26	-0.454194	0.255	0.758	4.09896e-22
														GSTO1	2.90111e-32	-0.297852	0.602	0.618	4.36327e-28																							PSMB7	2.79506e-26	-0.474074	0.318	0.809	4.20377e-22
														EZR	3.02682e-32	-0.313686	0.611	0.621	4.55234e-28																							RSL24D1	3.28567e-26	-0.472142	0.349	0.841	4.94164e-22
														ACTL6A	4.09335e-32	-0.293857	0.432	0.516	6.1564e-28																							MCTS1	3.57734e-26	-0.388666	0.13	0.613	5.38032e-22
														JUNB	4.14494e-32	-0.323763	0.867	0.813	6.23398e-28																							NOSIP	4.07721e-26	-0.389698	0.141	0.622	6.13212e-22
														FOS	1.15145e-31	-0.373204	0.955	0.875	1.73178e-27																							ATP5B	4.2929e-26	-0.43643	0.354	0.851	6.45652e-22
														GDI2	1.23453e-31	-0.277213	0.82	0.768	1.85673e-27																							HSPA2	4.39269e-26	-0.495778	0.245	0.731	6.60661e-22
														MFAP1	1.29589e-31	-0.285026	0.254	0.395	1.94903e-27																							GABARAPL2	4.68553e-26	-0.371745	0.13	0.602	7.04703e-22
														EIF3I	1.31883e-31	-0.292281	0.68	0.668	1.98352e-27																							NDUFC2	6.38641e-26	-0.443539	0.427	0.894	9.60516e-22
														ST13	1.55318e-31	-0.271514	0.909	0.852	2.33598e-27																							ATP6V0E1	6.45449e-26	-0.470506	0.422	0.89	9.70755e-22
														TOP1	3.84544e-31	-0.314649	0.471	0.54	5.78354e-27																							C19orf10	1.27537e-25	-0.405122	0.208	0.704	1.91816e-21
														DNAJC8	6.01738e-31	-0.298205	0.575	0.6	9.05014e-27																							NDUFA11	1.64586e-25	-0.434381	0.49	0.91	2.47537e-21
														AHSA1	6.04795e-31	-0.288853	0.426	0.52	9.09612e-27																							DDT	2.98429e-25	-0.446224	0.422	0.883	4.48838e-21
														ATP1B1	9.50156e-31	-0.29553	0.902	0.843	1.42903e-26																							DDX46	3.78744e-25	-0.408695	0.25	0.755	5.69632e-21
														ECH1	1.23406e-30	-0.295977	0.606	0.621	1.85603e-26																							HSD17B10	4.44639e-25	-0.370671	0.135	0.593	6.68737e-21
														HAT1	1.40997e-30	-0.340811	0.512	0.554	2.1206e-26																							TUFM	4.77729e-25	-0.449923	0.375	0.853	7.18504e-21
														BZW1	2.72364e-30	-0.289695	0.581	0.601	4.09635e-26																							LDHB	5.35879e-25	-0.412736	0.714	0.981	8.05963e-21
														HNRNPD	3.59623e-30	-0.276901	0.855	0.781	5.40873e-26																							RPL27A	5.50606e-25	-0.310312	0.948	0.999	8.28112e-21
														ANP32A	3.83202e-30	-0.275991	0.785	0.708	5.76336e-26																							CHCHD1	5.55613e-25	-0.380274	0.208	0.702	8.35642e-21
														DNAJC7	6.6688e-30	-0.295638	0.512	0.555	1.00299e-25																							ETFB	5.99081e-25	-0.383707	0.089	0.527	9.01018e-21
														PRDX4	8.06045e-30	-0.260096	0.908	0.824	1.21229e-25																							HSPA8	6.10314e-25	-0.430646	0.557	0.944	9.17912e-21
														SYNE2	2.035e-29	-0.325113	0.548	0.581	3.06064e-25																							TYMP	8.69839e-25	-0.471384	0.37	0.847	1.30824e-20
														NOP58	2.18876e-29	-0.299364	0.581	0.598	3.29189e-25																							MRPL3	8.75894e-25	-0.399381	0.208	0.701	1.31734e-20
														DYNC1H1	3.19781e-29	-0.304804	0.607	0.614	4.80951e-25																							ESD	9.20753e-25	-0.379023	0.083	0.512	1.38481e-20
														HDAC1	9.58385e-29	-0.287349	0.438	0.512	1.44141e-24																							TACSTD2	9.34474e-25	-0.479142	0.37	0.849	1.40545e-20
														PRPF40A	1.79858e-28	-0.280025	0.714	0.681	2.70506e-24																							ATP5G1	9.35381e-25	-0.435781	0.406	0.888	1.40681e-20
														N4BP2L2	2.85074e-28	-0.296062	0.631	0.628	4.28752e-24																							WBSCR22	1.06273e-24	-0.356494	0.073	0.5	1.59835e-20
														GMPS	2.34637e-27	-0.288784	0.513	0.549	3.52894e-23																							PSMA1	1.28732e-24	-0.419798	0.281	0.769	1.93612e-20
														SMARCC1	2.35605e-27	-0.274138	0.754	0.709	3.54351e-23																							SRSF5	1.56839e-24	-0.396287	0.099	0.531	2.35886e-20
														PSMC1	2.5303e-27	-0.276905	0.596	0.609	3.80557e-23																							NQO1	1.68395e-24	-0.367708	0.193	0.676	2.53266e-20
														DHPS	4.83895e-27	-0.26844	0.734	0.695	7.27779e-23																							CCT5	1.83559e-24	-0.436183	0.286	0.782	2.76073e-20
														DDX39A	6.37172e-27	-0.317381	0.669	0.653	9.58306e-23																							MT-ND5	1.85414e-24	0.362439	0.99	0.997	2.78863e-20
														PDCD10	6.66163e-27	-0.279772	0.473	0.529	1.00191e-22																							MRPL15	1.88952e-24	-0.411003	0.443	0.906	2.84183e-20
														GSTM3	6.7336e-27	-0.290592	0.486	0.54	1.01273e-22																							CHMP5	1.93722e-24	-0.382235	0.057	0.466	2.91357e-20
														IMPDH2	7.33474e-27	-0.265902	0.793	0.728	1.10314e-22																							TXNDC9	2.20178e-24	-0.358255	0.062	0.481	3.31147e-20
														MTX1	1.27125e-26	-0.265319	0.595	0.614	1.91196e-22																							MFSD10	2.42479e-24	-0.375531	0.234	0.724	3.64689e-20
														GSPT1	2.27271e-26	-0.262741	0.813	0.736	3.41815e-22																							TMEM208	2.54777e-24	-0.343285	0.099	0.542	3.83184e-20
														SNRPA1	5.95373e-26	-0.261166	0.726	0.675	8.95441e-22																							MRPL22	3.19994e-24	-0.377774	0.068	0.484	4.81272e-20
														RAB14	6.81088e-26	-0.26594	0.459	0.521	1.02436e-21																							KRT7	3.46638e-24	-0.393379	0.896	0.993	5.21344e-20
														HLTF	8.55577e-26	-0.274925	0.404	0.479	1.28679e-21																							PET100	3.9292e-24	-0.356213	0.104	0.541	5.90952e-20
														HSPA9	8.68652e-26	-0.280991	0.575	0.59	1.30645e-21																							DUT	4.52647e-24	-0.491028	0.411	0.843	6.80782e-20
														CDC123	3.17793e-25	-0.267091	0.593	0.603	4.77961e-21																							PPIE	5.09021e-24	-0.384083	0.135	0.586	7.65568e-20
														CDC42	1.3524e-24	-0.255412	0.812	0.762	2.03401e-20																							PTGES3	5.53987e-24	-0.455487	0.458	0.904	8.33197e-20
														DKC1	3.81565e-24	-0.283053	0.546	0.557	5.73874e-20																							XRCC6	5.59431e-24	-0.391759	0.229	0.705	8.41384e-20
														RNASEH2A	4.41981e-24	-0.354787	0.762	0.678	6.64739e-20																							PGK1	6.20505e-24	-0.390171	0.26	0.765	9.33239e-20
														EIF4G1	7.53091e-24	-0.278289	0.588	0.581	1.13265e-19																							DDOST	7.11607e-24	-0.38877	0.177	0.649	1.07026e-19
														SRSF5	1.31502e-23	-0.267004	0.472	0.524	1.97779e-19																							PPP1CB	7.48416e-24	0.690972	0.745	0.733	1.12562e-19
														LGALS3BP	3.1489e-23	-0.263273	0.547	0.551	4.73594e-19																							HNRNPM	8.989e-24	-0.43059	0.339	0.819	1.35195e-19
														PCMT1	3.48569e-23	-0.259506	0.462	0.51	5.24248e-19																							H2AFJ	1.31489e-23	-0.459068	0.615	0.945	1.97759e-19
														GOLGB1	3.83441e-23	-0.285837	0.335	0.423	5.76695e-19																							OBP2B	1.41403e-23	-0.378972	0.172	0.634	2.1267e-19
														TXNDC9	5.12749e-23	-0.255506	0.412	0.477	7.71174e-19																							MRPL28	1.67704e-23	-0.396596	0.104	0.525	2.52227e-19
														PAICS	1.19881e-22	-0.261491	0.64	0.609	1.80301e-18																							NDUFA8	1.92243e-23	-0.353017	0.135	0.586	2.89134e-19
														HSPH1	1.42207e-22	-0.279592	0.718	0.668	2.13879e-18																							TRIP6	2.22331e-23	-0.365911	0.193	0.667	3.34385e-19
														SQSTM1	1.56007e-22	-0.260389	0.952	0.866	2.34635e-18																							CLIC1	2.68696e-23	-0.385027	0.354	0.853	4.04119e-19
														ABCE1	3.57148e-22	-0.262781	0.427	0.476	5.37151e-18																							S100A4	2.77802e-23	-0.514971	0.672	0.953	4.17814e-19
														ATP1B3	5.46063e-22	-0.263298	0.82	0.747	8.21279e-18																							LGALS3BP	3.24814e-23	-0.362262	0.13	0.565	4.8852e-19
														RTN3	1.92312e-21	-0.258855	0.455	0.49	2.89237e-17																							RABAC1	3.55308e-23	-0.453383	0.526	0.932	5.34383e-19
														NAP1L4	2.01135e-21	-0.268476	0.549	0.554	3.02507e-17																							ATP5J	5.26746e-23	-0.400338	0.583	0.941	7.92226e-19
														PSMC6	2.13252e-21	-0.264147	0.422	0.468	3.2073e-17																							EXOSC5	6.76804e-23	-0.343371	0.083	0.496	1.01791e-18
														TAX1BP1	1.47108e-20	-0.26412	0.559	0.56	2.2125e-16																							GTF2H5	6.92762e-23	-0.354511	0.151	0.601	1.04191e-18
														BST2	1.90451e-20	-0.255451	0.945	0.858	2.86439e-16																							SNRPA1	8.17199e-23	-0.345342	0.214	0.7	1.22907e-18
														KIAA0020	5.81312e-20	-0.255765	0.405	0.458	8.74293e-16																							BST2	1.0566e-22	-0.429322	0.432	0.888	1.58913e-18
														PCNA	6.95994e-20	-0.277546	0.332	0.411	1.04678e-15																							H3F3B	1.1369e-22	-0.367667	0.859	0.989	1.70989e-18
														YWHAE	1.72909e-19	-0.268077	0.647	0.613	2.60055e-15																							LGALS3	1.61412e-22	-0.436084	0.484	0.899	2.42763e-18
														ITM2B	2.08245e-19	-0.252769	0.365	0.425	3.132e-15																							DCTN3	1.66522e-22	-0.30652	0.125	0.573	2.50448e-18
														RAD21	2.73745e-19	-0.260097	0.912	0.812	4.11712e-15																							MRPS28	1.69152e-22	-0.335906	0.104	0.526	2.54405e-18
														ACADVL	7.06048e-19	-0.256218	0.391	0.444	1.0619e-14																							FAM162A	1.76986e-22	-0.32447	0.146	0.592	2.66187e-18
														EIF5A	5.27438e-18	-0.254079	0.595	0.582	7.93266e-14																							NDUFB9	1.86824e-22	-0.366684	0.698	0.976	2.80983e-18
														ANXA5	1.03653e-17	-0.257084	0.535	0.528	1.55894e-13																							SAP18	2.15121e-22	-0.345872	0.198	0.668	3.23542e-18
														SFN	3.48568e-17	-0.273429	0.733	0.648	5.24247e-13																							SF3B1	2.7156e-22	-0.35948	0.172	0.618	4.08426e-18
														CRABP2	1.7911e-16	-0.273971	0.785	0.719	2.69382e-12																							ABRACL	2.94724e-22	-0.373861	0.729	0.966	4.43265e-18
														HLA-A	1.76422e-15	-0.254069	0.452	0.47	2.65338e-11																							NCL	3.84984e-22	-0.476154	0.526	0.919	5.79016e-18
														TSC22D1	2.07281e-15	-0.251573	0.744	0.665	3.11751e-11																							VPS29	4.21718e-22	-0.322918	0.135	0.564	6.34263e-18
														CTGF	6.27304e-15	-0.341734	0.366	0.412	9.43465e-11																							HLA-C	4.30396e-22	-0.370867	0.292	0.785	6.47316e-18
														FBXO32	7.91832e-15	-0.292762	0.486	0.486	1.19092e-10																							COX7C	4.48271e-22	-0.349003	0.766	0.98	6.742e-18
														MCM7	5.35747e-14	-0.250651	0.664	0.589	8.05764e-10																							PSMD7	4.7021e-22	-0.373942	0.219	0.675	7.07195e-18
														ISG15	8.09861e-14	-0.460973	0.915	0.805	1.21803e-09																							COMMD4	4.97415e-22	-0.33619	0.104	0.52	7.48112e-18
														DUSP1	3.17535e-13	-0.252169	0.694	0.626	4.77572e-09																							PKM	7.51503e-22	-0.371167	0.604	0.951	1.13026e-17
														PLK2	1.31921e-10	-0.263545	0.447	0.441	1.98409e-06																							DPY30	7.93219e-22	-0.384269	0.271	0.739	1.193e-17
														APOE	2.4012e-07	-0.292784	0.631	0.585	0.0036114																							SRP9	8.17454e-22	-0.396261	0.427	0.872	1.22945e-17
																																										HIGD1A	8.54443e-22	-0.326032	0.167	0.624	1.28508e-17
																																										UBE2M	1.12002e-21	-0.394708	0.464	0.892	1.68451e-17
																																										PMF1	1.18894e-21	-0.314058	0.182	0.641	1.78817e-17
																																										ARL2	1.32582e-21	-0.324375	0.229	0.701	1.99403e-17
																																										MRPS7	1.34311e-21	-0.348637	0.193	0.636	2.02003e-17
																																										PSMA2.1	1.50921e-21	-0.338282	0.099	0.505	2.26986e-17
																																										PSENEN	1.59032e-21	-0.332814	0.068	0.455	2.39184e-17
																																										UBL5	1.74043e-21	-0.361781	0.734	0.975	2.61761e-17
																																										SHFM1	1.97267e-21	-0.355989	0.807	0.987	2.96689e-17
																																										MRPL47	2.41221e-21	-0.36764	0.219	0.671	3.62797e-17
																																										IMP3	2.5775e-21	-0.331858	0.167	0.61	3.87656e-17
																																										COMT	2.64504e-21	-0.321641	0.172	0.613	3.97814e-17
																																										PIH1D1	3.51078e-21	-0.343187	0.193	0.636	5.28021e-17
																																										AIMP1	3.6194e-21	-0.321458	0.224	0.694	5.44357e-17
																																										ECI1	3.70118e-21	-0.353747	0.365	0.821	5.56657e-17
																																										SNRPG	3.77921e-21	-0.355124	0.656	0.94	5.68393e-17
																																										TIMMDC1	3.85799e-21	-0.311423	0.172	0.619	5.80242e-17
																																										TRMT112	4.11412e-21	-0.383969	0.411	0.865	6.18764e-17
																																										NTHL1	4.36624e-21	-0.302834	0.068	0.455	6.56683e-17
																																										NHP2L1	4.71362e-21	-0.348363	0.417	0.868	7.08928e-17
																																										MRPS23	4.94101e-21	-0.302762	0.115	0.527	7.43128e-17
																																										CISD1	4.96732e-21	-0.321442	0.135	0.552	7.47086e-17
																																										MRPS6	5.16071e-21	-0.372973	0.276	0.742	7.76171e-17
																																										PEBP1	5.26404e-21	-0.333836	0.677	0.953	7.91712e-17
																																										WDR74	5.30642e-21	-0.358464	0.078	0.457	7.98085e-17
																																										MRPS18C	5.57196e-21	-0.297325	0.125	0.541	8.38023e-17
																																										HYI	5.80446e-21	-0.32078	0.089	0.485	8.7299e-17
																																										TRAPPC2L	5.92964e-21	-0.319802	0.125	0.545	8.91819e-17
																																										POLR2L	5.97453e-21	-0.342527	0.74	0.975	8.98569e-17
																																										CALM1	6.07026e-21	-0.410818	0.729	0.977	9.12967e-17
																																										PDIA6	6.28726e-21	-0.38532	0.297	0.766	9.45605e-17
																																										HLA-A	7.06313e-21	-0.346924	0.089	0.481	1.06229e-16
																																										ARPC3	7.11963e-21	-0.323063	0.359	0.847	1.07079e-16
																																										VAMP8	7.2416e-21	-0.340425	0.266	0.738	1.08914e-16
																																										SF3B5	7.29573e-21	-0.312005	0.214	0.672	1.09728e-16
																																										VPS25	9.44954e-21	-0.319203	0.047	0.41	1.42121e-16
																																										CD9	9.78782e-21	-0.388575	0.297	0.755	1.47209e-16
																																										VAPA	1.02642e-20	-0.368829	0.536	0.926	1.54373e-16
																																										LCN2	1.0485e-20	-0.479976	0.375	0.806	1.57694e-16
																																										NDUFV2	1.06998e-20	-0.400578	0.609	0.947	1.60926e-16
																																										SDHC	1.38692e-20	-0.301962	0.167	0.607	2.08592e-16
																																										COX4I1	1.42127e-20	-0.31901	0.771	0.985	2.1376e-16
																																										SCO2	1.48767e-20	-0.301166	0.203	0.654	2.23745e-16
																																										PSMB4	1.48927e-20	-0.348043	0.328	0.83	2.23987e-16
																																										HSPA1A	1.59098e-20	-0.337518	0.161	0.585	2.39284e-16
																																										RNF181	1.72392e-20	-0.284569	0.094	0.494	2.59277e-16
																																										CHMP2A	1.84835e-20	-0.305946	0.203	0.66	2.77992e-16
																																										HNRNPF	2.14876e-20	-0.364261	0.38	0.851	3.23174e-16
																																										2021-09-07	2.15299e-20	-0.390581	0.406	0.856	3.23809e-16
																																										RTP4	2.447e-20	-0.320391	0.135	0.546	3.68029e-16
																																										HN1	2.67828e-20	-0.374309	0.609	0.936	4.02813e-16
																																										WDR83OS	2.68317e-20	-0.357801	0.703	0.979	4.03549e-16
																																										EIF3I	3.30049e-20	-0.326911	0.229	0.686	4.96393e-16
																																										SCP2	3.94511e-20	-0.316123	0.167	0.598	5.93345e-16
																																										BUD31	3.9594e-20	-0.330841	0.219	0.662	5.95493e-16
																																										CDK6	4.62577e-20	0.542362	0.833	0.879	6.95716e-16
																																										RDH10	4.89356e-20	0.43008	0.922	0.948	7.35991e-16
																																										CENPW	5.28821e-20	-0.33089	0.073	0.445	7.95347e-16
																																										GLRX3	5.51377e-20	-0.296245	0.073	0.447	8.2927e-16
																																										C1QBP	6.05623e-20	-0.32021	0.349	0.816	9.10858e-16
																																										DDX24	6.10806e-20	-0.325817	0.26	0.71	9.18653e-16
																																										TIMM10	6.16714e-20	-0.297536	0.172	0.601	9.27537e-16
																																										SLC39A4	6.17496e-20	-0.405475	0.547	0.92	9.28713e-16
																																										S100P	6.69268e-20	-0.364145	0.198	0.623	1.00658e-15
																																										BLVRB	7.65317e-20	-0.334179	0.068	0.433	1.15104e-15
																																										NDUFS8	7.83946e-20	-0.34315	0.474	0.898	1.17905e-15
																																										GAPDH	8.74836e-20	0.303611	1	1	1.31575e-15
																																										NANS	9.24717e-20	-0.273244	0.177	0.618	1.39077e-15
																																										PCMT1	9.30292e-20	-0.297341	0.12	0.516	1.39916e-15
																																										NDUFA5	9.46845e-20	-0.305753	0.135	0.545	1.42405e-15
																																										CKS2	1.27162e-19	-0.608986	0.448	0.83	1.91252e-15
																																										NDUFB2	1.50077e-19	-0.366296	0.583	0.934	2.25716e-15
																																										MRPL33	1.54392e-19	-0.352271	0.339	0.788	2.32206e-15
																																										PSMC4	1.75998e-19	-0.344133	0.161	0.571	2.64701e-15
																																										MDH2	1.82027e-19	-0.368698	0.578	0.94	2.73769e-15
																																										C1orf35	1.93832e-19	-0.317129	0.104	0.483	2.91524e-15
																																										RARRES1	1.9952e-19	-0.512314	0.583	0.937	3.00079e-15
																																										APOE	2.14876e-19	-0.490243	0.198	0.607	3.23173e-15
																																										FKBP2	2.23914e-19	-0.311859	0.245	0.697	3.36766e-15
																																										PDCD6	2.85305e-19	-0.334365	0.307	0.775	4.29099e-15
																																										FBXO2	2.88192e-19	-0.349696	0.125	0.503	4.3344e-15
																																										HADHB	2.96809e-19	-0.318302	0.12	0.509	4.46401e-15
																																										TKT	3.25143e-19	-0.405336	0.682	0.968	4.89015e-15
																																										CCS	3.32442e-19	-0.301255	0.031	0.364	4.99992e-15
																																										TUBA4A	3.5419e-19	-0.293179	0.083	0.452	5.32701e-15
																																										UFC1	3.58405e-19	-0.323597	0.536	0.929	5.39042e-15
																																										SNRPB2	4.23366e-19	-0.309746	0.089	0.452	6.36743e-15
																																										COPS5	4.62646e-19	-0.254633	0.188	0.622	6.95819e-15
																																										ATP5D	4.80043e-19	-0.322197	0.781	0.981	7.21984e-15
																																										ADK	4.84727e-19	-0.29196	0.094	0.466	7.2903e-15
																																										ZNF593	4.90641e-19	-0.345021	0.531	0.909	7.37924e-15
																																										HNRNPH3	4.99925e-19	-0.323623	0.203	0.633	7.51887e-15
																																										UBE2V2	5.12801e-19	-0.34615	0.391	0.838	7.71253e-15
																																										C11orf58	5.51034e-19	-0.323412	0.339	0.801	8.28755e-15
																																										PFDN4	5.82255e-19	-0.29765	0.12	0.509	8.75711e-15
																																										EMC2	7.01759e-19	-0.331505	0.078	0.431	1.05544e-14
																																										UBXN1	7.21316e-19	-0.340947	0.297	0.761	1.08486e-14
																																										NGFRAP1	7.57041e-19	-0.277306	0.25	0.697	1.13859e-14
																																										MAGOHB	7.9321e-19	-0.285837	0.083	0.447	1.19299e-14
																																										AHSA1	9.41278e-19	-0.305842	0.13	0.519	1.41568e-14
																																										SMIM22	9.77413e-19	-0.293088	0.12	0.51	1.47003e-14
																																										SUMO1	9.96185e-19	-0.318237	0.417	0.843	1.49826e-14
																																										RTFDC1	1.03758e-18	-0.28895	0.109	0.485	1.56052e-14
																																										DYNLT1	1.07555e-18	-0.348915	0.344	0.798	1.61763e-14
																																										OCIAD1	1.11763e-18	-0.26607	0.115	0.503	1.68092e-14
																																										CTSC	1.22972e-18	-0.308372	0.052	0.391	1.8495e-14
																																										RBM42	1.24358e-18	-0.30011	0.068	0.42	1.87035e-14
																																										BTF3L4	1.27997e-18	-0.294842	0.339	0.792	1.92507e-14
																																										SUMO2	1.43051e-18	-0.319563	0.703	0.97	2.15149e-14
																																										NUPR1	1.46107e-18	-0.432047	0.375	0.801	2.19745e-14
																																										HSPA5	1.49366e-18	-0.393128	0.229	0.635	2.24647e-14
																																										SNRNP70	1.71395e-18	-0.264178	0.198	0.619	2.57777e-14
																																										TMEM50A	1.79897e-18	-0.319442	0.297	0.731	2.70566e-14
																																										MGST2	1.90114e-18	-0.308407	0.036	0.358	2.85931e-14
																																										MRPL52	2.01012e-18	-0.34935	0.344	0.77	3.02322e-14
																																										EIF4A3	2.10259e-18	-0.307223	0.068	0.415	3.16229e-14
																																										XRCC5	2.16481e-18	-0.322474	0.302	0.756	3.25587e-14
																																										CUEDC2	2.42678e-18	-0.267714	0.146	0.547	3.64988e-14
																																										PPAP2C	2.7888e-18	-0.371718	0.417	0.853	4.19436e-14
																																										ZNF207	2.80793e-18	-0.291726	0.177	0.589	4.22313e-14
																																										ITPA	3.39615e-18	-0.280469	0.12	0.496	5.10781e-14
																																										CHMP1B	3.42585e-18	-0.298106	0.266	0.72	5.15248e-14
																																										CKS1B	3.50951e-18	-0.430962	0.458	0.833	5.27831e-14
																																										MRPS34	3.69012e-18	-0.358274	0.401	0.839	5.54994e-14
																																										FKBP3	3.79727e-18	-0.286935	0.13	0.517	5.7111e-14
																																										AIMP2	4.08475e-18	-0.274467	0.151	0.554	6.14347e-14
																																										EEF1E1	4.27875e-18	-0.291322	0.099	0.464	6.43524e-14
																																										ATP6V1G1	5.38758e-18	-0.359755	0.552	0.922	8.10292e-14
																																										ORMDL2	5.61392e-18	-0.255121	0.068	0.411	8.44334e-14
																																										HLTF	5.84761e-18	-0.283508	0.109	0.48	8.79481e-14
																																										MRPL50	6.92972e-18	-0.263065	0.078	0.432	1.04223e-13
																																										CUTA	7.4739e-18	-0.32727	0.438	0.861	1.12408e-13
																																										PPIB	8.81025e-18	-0.379742	0.5	0.9	1.32506e-13
																																										BZW2	9.43721e-18	-0.32831	0.292	0.745	1.41936e-13
																																										ACTL6A	1.00262e-17	-0.280601	0.135	0.516	1.50795e-13
																																										ABCE1	1.02441e-17	-0.274314	0.115	0.481	1.54072e-13
																																										PHPT1	1.31257e-17	-0.339278	0.453	0.87	1.97411e-13
																																										NELFE	1.32634e-17	-0.257319	0.115	0.485	1.99482e-13
																																										LSR	1.32998e-17	-0.257382	0.182	0.601	2.00029e-13
																																										NOP58	1.44822e-17	-0.265724	0.193	0.61	2.17812e-13
																																										NDUFB8.1	1.45211e-17	-0.262763	0.234	0.675	2.18398e-13
																																										MED8	1.48349e-17	-0.270828	0.203	0.629	2.23117e-13
																																										RANBP1	1.52448e-17	-0.344394	0.474	0.875	2.29281e-13
																																										FMO2	1.56895e-17	-0.406829	0.13	0.492	2.35971e-13
																																										NOP10	1.63411e-17	-0.343506	0.464	0.871	2.4577e-13
																																										TMED9	1.6545e-17	-0.259062	0.167	0.572	2.48837e-13
																																										CBR3	1.89896e-17	-0.308166	0.198	0.598	2.85604e-13
																																										ASNA1	1.94254e-17	-0.303431	0.344	0.802	2.92158e-13
																																										SRSF2	2.09123e-17	-0.297985	0.339	0.774	3.14521e-13
																																										ERP29	2.1744e-17	-0.281231	0.229	0.662	3.2703e-13
																																										CRYAB	2.21534e-17	-0.380068	0.474	0.866	3.33188e-13
																																										VDAC2	2.22764e-17	-0.328612	0.432	0.861	3.35037e-13
																																										PSMG2	2.35782e-17	-0.27874	0.276	0.714	3.54616e-13
																																										CIRBP	2.37241e-17	-0.294157	0.385	0.83	3.5681e-13
																																										SNRPC	2.43516e-17	-0.264867	0.219	0.638	3.66247e-13
																																										TWISTNB	2.58489e-17	-0.257114	0.12	0.492	3.88767e-13
																																										MACROD1	2.64977e-17	-0.255067	0.135	0.521	3.98526e-13
																																										HNRNPR	2.78307e-17	-0.314379	0.312	0.741	4.18574e-13
																																										PQBP1	3.06573e-17	-0.261511	0.151	0.539	4.61087e-13
																																										ACTR6	3.36215e-17	-0.271543	0.099	0.446	5.05667e-13
																																										MPLKIP	3.64278e-17	-0.268075	0.182	0.583	5.47875e-13
																																										CACYBP	3.72993e-17	-0.3276	0.401	0.827	5.60982e-13
																																										TCEB1	4.38369e-17	-0.352987	0.568	0.923	6.59308e-13
																																										MRTO4	4.57014e-17	-0.277974	0.135	0.51	6.87348e-13
																																										EBP	4.73757e-17	-0.268279	0.104	0.455	7.12531e-13
																																										HAT1	4.89311e-17	-0.302448	0.172	0.561	7.35924e-13
																																										SRPK1	5.5668e-17	-0.255997	0.141	0.521	8.37247e-13
																																										CYP1B1	6.26273e-17	0.410267	0.906	0.953	9.41915e-13
																																										SNRPA	6.28929e-17	-0.257895	0.208	0.622	9.45909e-13
																																										AIP	6.42858e-17	-0.272773	0.167	0.554	9.66859e-13
																																										ATP5I	7.33979e-17	-0.320102	0.708	0.967	1.1039e-12
																																										AP1S1	7.77343e-17	-0.265826	0.182	0.581	1.16912e-12
																																										CD320	7.81763e-17	-0.278123	0.219	0.622	1.17577e-12
																																										PSMC1	8.04517e-17	-0.258969	0.208	0.621	1.20999e-12
																																										TSTD1	8.07075e-17	-0.342095	0.599	0.926	1.21384e-12
																																										ACADVL	8.60743e-17	-0.285037	0.099	0.448	1.29456e-12
																																										PTGR1	9.23005e-17	-0.27121	0.089	0.426	1.3882e-12
																																										ATP5G2	9.34906e-17	-0.330672	0.599	0.939	1.4061e-12
																																										RUVBL2	1.03565e-16	-0.253039	0.156	0.541	1.55761e-12
																																										DNAJA1	1.08134e-16	-0.335884	0.411	0.821	1.62633e-12
																																										LSM3	1.16497e-16	-0.30746	0.349	0.779	1.75212e-12
																																										NDUFB1	1.17482e-16	-0.279207	0.323	0.755	1.76694e-12
																																										AKAP8L	1.18926e-16	-0.275217	0.109	0.459	1.78865e-12
																																										TUBB2A	1.29143e-16	-0.25979	0.094	0.438	1.9423e-12
																																										CKB	1.49414e-16	-0.409727	0.443	0.812	2.24719e-12
																																										USMG5	1.50831e-16	-0.291247	0.745	0.974	2.2685e-12
																																										MLF2	1.54336e-16	-0.320663	0.365	0.818	2.32121e-12
																																										ENDOG	1.84373e-16	-0.25298	0.135	0.503	2.77297e-12
																																										CTU1	2.00364e-16	-0.255773	0.052	0.363	3.01347e-12
																																										NAE1	2.18996e-16	-0.260459	0.089	0.421	3.2937e-12
																																										PNN	2.48382e-16	-0.25831	0.193	0.578	3.73566e-12
																																										AKR7A2	2.74421e-16	-0.272531	0.25	0.667	4.1273e-12
																																										UMPS	2.89906e-16	-0.256799	0.062	0.376	4.36018e-12
																																										UBXN4	2.93434e-16	-0.274526	0.312	0.759	4.41324e-12
																																										SLC52A2	3.05767e-16	-0.253407	0.234	0.656	4.59873e-12
																																										CCNB2	3.26348e-16	-0.378161	0.083	0.397	4.90828e-12
																																										MORF4L2	3.67189e-16	-0.275743	0.25	0.668	5.52252e-12
																																										CDC42SE1	3.87586e-16	0.582075	0.448	0.276	5.82929e-12
																																										SQSTM1	4.15079e-16	-0.339376	0.474	0.894	6.24278e-12
																																										KTN1	4.26314e-16	0.405566	0.802	0.847	6.41177e-12
																																										TMBIM6	4.47796e-16	-0.287644	0.307	0.728	6.73485e-12
																																										LAMTOR5	5.13891e-16	-0.31457	0.531	0.917	7.72892e-12
																																										PTPRF	7.79155e-16	0.471526	0.766	0.813	1.17185e-11
																																										PFDN6	8.32976e-16	-0.254824	0.057	0.363	1.2528e-11
																																										ERH	9.89435e-16	-0.3141	0.448	0.862	1.48811e-11
																																										SARS	1.04208e-15	-0.280683	0.198	0.59	1.56729e-11
																																										CTNNB1	1.14494e-15	0.676635	0.562	0.463	1.72199e-11
																																										HNRNPH1	1.51448e-15	0.567161	0.589	0.503	2.27778e-11
																																										DCXR	1.56665e-15	-0.304343	0.286	0.688	2.35624e-11
																																										ITM2B	1.6436e-15	-0.254167	0.099	0.427	2.47198e-11
																																										PDHA1	1.69074e-15	-0.265363	0.12	0.455	2.54288e-11
																																										DDX27	1.70739e-15	-0.255596	0.135	0.481	2.56791e-11
																																										MRPL4	1.8484e-15	-0.253579	0.25	0.644	2.77999e-11
																																										MRPL54	1.92018e-15	-0.263542	0.312	0.739	2.88795e-11
																																										THRAP3	2.06743e-15	-0.259568	0.219	0.613	3.10942e-11
																																										CD14	2.12767e-15	-0.300692	0.026	0.299	3.20002e-11
																																										PGLS	2.34562e-15	-0.314899	0.443	0.851	3.52781e-11
																																										DEFB1	2.77973e-15	-0.428471	0.281	0.643	4.18071e-11
																																										CEBPB	2.8726e-15	-0.305934	0.375	0.796	4.3204e-11
																																										C14orf166	3.45643e-15	-0.290397	0.385	0.808	5.19848e-11
																																										TUBA1A	3.70964e-15	-0.374955	0.521	0.864	5.5793e-11
																																										NDUFC1	3.74931e-15	-0.251932	0.359	0.793	5.63896e-11
																																										SELM	3.91311e-15	-0.331453	0.521	0.868	5.88531e-11
																																										PTTG1	4.24562e-15	-0.520498	0.219	0.537	6.38541e-11
																																										INSR	5.64584e-15	0.606986	0.438	0.281	8.49134e-11
																																										PFKP	5.70377e-15	-0.258322	0.099	0.414	8.57848e-11
																																										CALD1	6.69053e-15	-0.449655	0.536	0.872	1.00626e-10
																																										TBCB	7.074e-15	-0.287913	0.406	0.816	1.06393e-10
																																										LSMD1	8.90479e-15	-0.269223	0.333	0.742	1.33928e-10
																																										RAB25	1.13083e-14	-0.295575	0.396	0.841	1.70077e-10
																																										HES1	1.57695e-14	-0.359222	0.333	0.71	2.37173e-10
																																										KRT14	1.79828e-14	-0.268974	0.094	0.4	2.70461e-10
																																										CITED2	1.79938e-14	-0.259077	0.177	0.542	2.70626e-10
																																										EIF3K	1.8429e-14	-0.269394	0.781	0.984	2.77172e-10
																																										LARS	1.90343e-14	-0.254021	0.245	0.642	2.86276e-10
																																										RCAN1	2.2606e-14	-0.285425	0.255	0.641	3.39994e-10
																																										RBP7	2.81837e-14	-0.288631	0.599	0.93	4.23883e-10
																																										S100A10	2.82632e-14	-0.299991	0.88	0.989	4.25079e-10
																																										MINOS1	2.84659e-14	-0.276144	0.385	0.809	4.28127e-10
																																										HNRNPK	2.93929e-14	-0.279815	0.5	0.902	4.42069e-10
																																										FIS1	4.12491e-14	-0.289214	0.464	0.865	6.20387e-10
																																										YWHAQ	4.90147e-14	-0.306837	0.526	0.905	7.37181e-10
																																										NDUFAF3	6.40594e-14	-0.262338	0.312	0.713	9.63454e-10
																																										TBCA	8.32874e-14	-0.276769	0.505	0.888	1.25264e-09
																																										EIF3D	9.7294e-14	-0.264079	0.37	0.784	1.4633e-09
																																										TPM2	1.16407e-13	-0.266946	0.359	0.767	1.75076e-09
																																										RARRES3	1.54521e-13	-0.403722	0.125	0.431	2.324e-09
																																										MRPS12	1.57888e-13	-0.292999	0.458	0.856	2.37464e-09
																																										SOX11	1.98138e-13	0.557949	0.578	0.527	2.97999e-09
																																										RHOA	2.0085e-13	-0.269284	0.453	0.852	3.02079e-09
																																										TCEA1	2.06073e-13	0.448425	0.771	0.821	3.09934e-09
																																										COX8A	2.29057e-13	-0.298725	0.521	0.906	3.44502e-09
																																										TNFRSF12A	2.38347e-13	-0.257443	0.266	0.623	3.58475e-09
																																										COX7A2	2.98407e-13	-0.257509	0.688	0.945	4.48805e-09
																																										LAMTOR2	3.27079e-13	-0.261048	0.51	0.887	4.91926e-09
																																										EIF4A2	3.84966e-13	-0.259686	0.443	0.854	5.78989e-09
																																										CSDE1	4.24637e-13	0.399394	0.776	0.871	6.38654e-09
																																										ATP6V1F	4.61873e-13	-0.278042	0.458	0.848	6.94656e-09
																																										GIPC1	4.74399e-13	-0.268253	0.427	0.839	7.13497e-09
																																										CD47	4.92005e-13	-0.253294	0.276	0.651	7.39976e-09
																																										ATP5L	5.08057e-13	-0.257149	0.583	0.914	7.64118e-09
																																										CCT6A	1.02788e-12	-0.279006	0.531	0.906	1.54593e-08
																																										KLF2	1.2671e-12	-0.258961	0.172	0.483	1.90572e-08
																																										C19orf60	1.53787e-12	-0.251328	0.474	0.856	2.31296e-08
																																										DUSP1	1.91385e-12	-0.251514	0.286	0.649	2.87843e-08
																																										SAA2	2.17144e-12	-0.312308	0.047	0.291	3.26584e-08
																																										MYC	2.21498e-12	-0.285945	0.776	0.963	3.33132e-08
																																										FXYD3	2.62684e-12	-0.257556	0.536	0.882	3.95076e-08
																																										MRPL36	4.43318e-12	-0.253026	0.422	0.786	6.66751e-08
																																										TTC3	7.86681e-12	0.441447	0.771	0.861	1.18317e-07
																																										UQCR10	8.30628e-12	-0.25785	0.526	0.889	1.24926e-07
																																										NUDT1	8.9371e-12	-0.256653	0.328	0.678	1.34414e-07
																																										C12orf57	9.23802e-12	-0.258872	0.589	0.91	1.3894e-07
																																										MIF	1.07625e-11	-0.267488	0.682	0.939	1.61867e-07
																																										NBEAL1	1.15135e-11	0.316001	0.812	0.91	1.73163e-07
																																										KDELR1	1.29789e-11	-0.280508	0.536	0.897	1.95203e-07
																																										CXCL1	1.63231e-11	-0.312882	0.104	0.358	2.45499e-07
																																										CCNB1	2.66023e-11	-0.309661	0.052	0.276	4.00099e-07
																																										ELF3	3.26467e-11	-0.296844	0.557	0.885	4.91006e-07
																																										TSTA3	3.84114e-11	-0.25651	0.448	0.833	5.77708e-07
																																										CCNI	7.55508e-11	0.291222	0.875	0.947	1.13628e-06
																																										H1FX	9.29241e-11	-0.295407	0.5	0.833	1.39758e-06
																																										CDC20	1.12878e-10	-0.554697	0.318	0.577	1.69769e-06
																																										ID1	1.2004e-10	-0.303075	0.365	0.691	1.8054e-06
																																										EIF4G2	1.73438e-10	0.427139	0.708	0.754	2.60851e-06
																																										HMGN1	2.27922e-10	0.308988	0.932	0.965	3.42795e-06
																																										PPP1R14B	2.73577e-10	0.251973	0.99	0.991	4.1146e-06
																																										NEDD8	3.29777e-10	-0.26332	0.573	0.93	4.95985e-06
																																										KIAA0101	3.92964e-10	-0.308359	0.38	0.691	5.91018e-06
																																										MAL2	5.36507e-10	0.318162	0.807	0.852	8.06907e-06
																																										TPM4	7.8893e-10	0.366286	0.823	0.888	1.18655e-05
																																										HMGB2	9.38326e-10	-0.322236	0.318	0.594	1.41124e-05
																																										BRI3	1.07631e-09	0.325498	0.844	0.905	1.61877e-05
																																										SOX4	2.16177e-09	0.303158	0.922	0.959	3.2513e-05
																																										CITED4	3.51369e-09	-0.270067	0.87	0.977	5.28459e-05
																																										JUN	1.62245e-08	-0.2842	0.677	0.927	0.000244017
																																										WASF2	8.7033e-08	0.434799	0.677	0.779	0.00130898
																																										CTTN	8.8226e-08	0.424574	0.594	0.63	0.00132692
																																										NENF	9.64605e-08	0.335075	0.75	0.829	0.00145077
																																										FOS	1.116e-07	-0.287606	0.672	0.895	0.00167847
																																										ZFP36L1	1.20822e-07	0.335837	0.755	0.849	0.00181716
																																										OST4	1.33404e-07	0.263416	0.927	0.973	0.00200639
																																										NME4	1.5283e-07	0.324603	0.807	0.891	0.00229856
																																										TP53	1.67849e-07	0.452117	0.365	0.274	0.00252444
																																										TRPS1	2.08705e-07	0.358291	0.729	0.835	0.00313892
																																										HIST1H4C	2.11121e-07	-0.393899	0.51	0.771	0.00317526
																																										EIF5A	4.47903e-07	0.389994	0.568	0.585	0.00673646
																																										BRD4	6.99575e-07	0.293948	0.734	0.865	0.0105216
																																										PTPRS	2.05582e-06	0.439441	0.344	0.263	0.0309196
																																										DBF4	2.99537e-06	0.274541	0.74	0.86	0.0450503
[truncated: 11 more columns]

## Sheet: SUM149 clusters
CLUSTER 0							CLUSTER 1							CLUSTER 2
gene	p_val	avg_logFC	pct.1	pct.2	p_val_adj		gene	p_val	avg_logFC	pct.1	pct.2	p_val_adj		gene	p_val	avg_logFC	pct.1	pct.2	p_val_adj
UBE2S	4.68101e-39	-0.840153	0.971	0.993	6.19064e-35		PIF1	4.77914e-35	0.563204	0.763	0.227	6.32041e-31		RAN	2.52565e-33	0.475983	1	0.991	3.34018e-29
CDC20	6.61888e-39	-0.739742	0.634	0.956	8.75347e-35		CENPF	8.89724e-33	0.658713	0.987	0.78	1.17666e-28		RANBP1	3.08119e-31	0.498137	1	0.994	4.07487e-27
CCNB1	2.24353e-36	-0.640789	0.331	0.873	2.96707e-32		TOP2A	8.26676e-30	0.616335	0.987	0.756	1.09328e-25		UBB	2.43567e-30	0.545316	1	0.994	3.22118e-26
PLK1	5.99662e-34	-0.629873	0.378	0.873	7.93053e-30		PLK1	8.7021e-30	0.497384	0.961	0.539	1.15085e-25		PSMA4	3.58673e-30	0.585909	1	0.985	4.74345e-26
CDKN3	1.10056e-33	-0.700272	0.756	0.989	1.45549e-29		ASPM	5.3994e-29	0.445187	0.947	0.559	7.1407e-25		CLIC1	5.31197e-28	0.562409	0.992	0.975	7.02507e-24
TUBB4B	4.13928e-33	-0.645072	0.983	1	5.4742e-29		FAM83D	2.75496e-28	0.37928	0.862	0.468	3.64343e-24		CACYBP	8.12049e-28	0.465636	0.992	0.926	1.07394e-23
UBE2C	1.22256e-32	-0.804005	0.663	0.975	1.61684e-28		TPX2	2.75834e-27	0.473211	0.987	0.729	3.64791e-23		NPM1	9.35448e-28	0.558358	1	0.994	1.23713e-23
CENPF	1.73805e-31	-0.719594	0.68	0.956	2.29857e-27		UBE2S	1.60321e-26	0.602645	1	0.976	2.12024e-22		EBNA1BP2	3.9274e-27	0.498073	1	0.966	5.19399e-23
HMGB2	8.33999e-31	-0.696657	0.837	1	1.10296e-26		ARHGAP11A	1.18888e-25	0.397304	0.987	0.708	1.57229e-21		TPI1	1.20292e-26	0.428332	1	0.997	1.59086e-22
AURKA	4.35219e-30	-0.588733	0.558	0.931	5.75577e-26		AURKA	2.98326e-25	0.491462	0.961	0.698	3.94536e-21		PSMB3	9.00415e-26	0.480874	0.992	0.84	1.1908e-21
HMMR	1.36495e-28	-0.384983	0.285	0.815	1.80514e-24		ARL6IP1	6.81106e-25	0.462654	0.993	0.793	9.00762e-21		PSMB1	1.452e-25	0.485736	1	0.981	1.92028e-21
FAM83D	5.343e-28	-0.372654	0.302	0.789	7.06611e-24		CENPA	3.62079e-23	0.408571	0.901	0.576	4.78849e-19		C1QBP	2.74829e-25	0.440348	1	0.994	3.63462e-21
PTTG1	5.36592e-28	-0.538594	0.494	0.905	7.09643e-24		SAPCD2	1.75789e-22	0.396136	0.855	0.522	2.32481e-18		HSD17B10	2.21823e-24	0.418637	0.992	0.923	2.93361e-20
TPX2	1.09471e-27	-0.501678	0.61	0.945	1.44776e-23		MT-CO2	5.1457e-22	0.382404	1	0.99	6.80518e-18		MRPL51	7.40183e-24	0.391803	1	0.991	9.78892e-20
KNSTRN	1.71478e-27	-0.415299	0.68	0.942	2.2678e-23		NCAPD2	5.15248e-22	0.297972	0.961	0.668	6.81415e-18		LDHB	7.40193e-24	0.487803	1	0.997	9.78905e-20
ASPM	4.21821e-27	-0.445898	0.419	0.862	5.57859e-23		MT-CYB	9.31284e-22	0.377365	1	0.983	1.23162e-17		PSMA7	1.16961e-23	0.338363	1	1	1.54681e-19
CKS2	1.85629e-26	-0.596389	0.942	0.996	2.45494e-22		MT-ND2	1.73015e-21	0.307489	1	0.99	2.28812e-17		MYL12B	1.2293e-23	0.464755	1	0.991	1.62575e-19
CENPA	1.96019e-26	-0.416482	0.413	0.858	2.59235e-22		MT-ND4	1.38647e-20	0.332447	1	0.99	1.83361e-16		GSTP1	4.09834e-23	0.44203	1	0.997	5.42005e-19
BIRC5	2.99721e-26	-0.453987	0.657	0.975	3.96381e-22		DEPDC1	2.63517e-20	0.271487	0.836	0.444	3.48501e-16		PRDX4	4.41156e-23	0.419231	1	0.981	5.83428e-19
KPNA2	3.71872e-26	-0.531396	0.674	0.916	4.91801e-22		CENPE	5.70984e-20	0.25332	0.789	0.39	7.55127e-16		UBE2L3	1.15277e-22	0.389934	1	0.932	1.52454e-18
CDCA3	1.44613e-25	-0.38916	0.512	0.902	1.9125e-21		CCNF	3.00975e-19	0.265566	0.737	0.376	3.98039e-15		ARPC3	1.68917e-22	0.385902	1	0.975	2.23393e-18
ARL6IP1	1.50111e-25	-0.531916	0.727	0.945	1.98521e-21		CDC20	9.247e-19	0.393498	0.967	0.763	1.22292e-14		ATPIF1	1.74503e-22	0.439692	1	0.985	2.30781e-18
PRC1	1.86806e-25	-0.421585	0.68	0.985	2.47051e-21		HP1BP3	2.69842e-18	0.322119	0.993	0.892	3.56867e-14		PSMB6	2.04459e-22	0.416928	1	0.944	2.70397e-18
CCNA2	2.02118e-25	-0.416248	0.564	0.935	2.67302e-21		MT-CO3	2.75933e-18	0.361768	1	0.997	3.64922e-14		HSP90AA1	4.2277e-22	0.517074	1	0.997	5.59114e-18
NUSAP1	2.65478e-25	-0.410828	0.564	0.945	3.51095e-21		MIR205HG	3.06462e-18	0.456711	0.928	0.637	4.05295e-14		SNRPB2	5.44276e-22	0.380585	0.992	0.929	7.19805e-18
CENPE	4.89635e-25	-0.306848	0.221	0.716	6.47543e-21		CCNB1	3.31209e-18	0.260442	0.914	0.536	4.38024e-14		ATP5C1	6.59277e-22	0.396907	1	0.944	8.71894e-18
TOP2A	6.86451e-25	-0.582396	0.628	0.964	9.07831e-21		CDKN2D	3.55581e-18	0.327941	0.888	0.559	4.70256e-14		EBP	6.81728e-22	0.387107	1	0.957	9.01585e-18
SMC4	1.71373e-24	-0.44534	0.791	0.993	2.26641e-20		MT-ND1	4.56562e-18	0.319894	1	0.997	6.03804e-14		SSBP1	6.84221e-22	0.402922	0.976	0.812	9.04882e-18
PIF1	1.53507e-22	-0.435322	0.134	0.582	2.03012e-18		H2AFX	6.83864e-18	0.344017	0.98	0.837	9.0441e-14		MYL12A	3.9999e-21	0.422112	1	0.991	5.28987e-17
NUCKS1	1.71127e-22	-0.406878	1	1	2.26316e-18		SRP14	6.99167e-18	-0.352872	0.993	1	9.24649e-14		PARK7	4.12699e-21	0.365686	1	0.997	5.45795e-17
KIF2C	4.19529e-22	-0.281648	0.326	0.789	5.54827e-18		HMMR	9.08892e-18	0.264841	0.901	0.461	1.20201e-13		C14orf166	4.82431e-21	0.343836	1	0.985	6.38015e-17
MKI67	2.53862e-21	-0.4295	0.616	0.953	3.35732e-17		MT-CO1	1.31475e-17	0.342697	1	0.997	1.73876e-13		PRDX2	5.4296e-21	0.446619	0.967	0.873	7.18065e-17
SGOL1	4.71864e-21	-0.322051	0.529	0.895	6.2404e-17		MKI67	1.32321e-17	0.377684	0.967	0.749	1.74994e-13		FKBP3	5.73119e-21	0.403589	1	0.904	7.5795e-17
NCAPD2	8.32726e-21	-0.288789	0.535	0.913	1.10128e-16		GTSE1	2.00011e-17	0.262996	0.822	0.488	2.64515e-13		HAUS1	6.41739e-21	0.319962	0.935	0.744	8.487e-17
ARHGAP11A	1.57519e-20	-0.351527	0.61	0.924	2.0832e-16		NACA	5.39419e-17	-0.289083	1	0.986	7.13382e-13		HMGB1	1.07384e-20	0.436652	1	0.991	1.42015e-16
NUF2	2.23939e-20	-0.258898	0.221	0.665	2.9616e-16		KPNA2	5.76291e-17	0.339883	0.934	0.766	7.62145e-13		CFL1	1.26303e-20	0.350793	1	1	1.67036e-16
HMGB3	2.48183e-20	-0.413716	0.773	0.975	3.28222e-16		FAU	1.33588e-16	-0.372215	1	1	1.7667e-12		SAP18	2.48417e-20	0.358382	1	0.972	3.28531e-16
CDKN2D	3.53236e-20	-0.338265	0.419	0.829	4.67154e-16		FOXM1	1.75817e-16	0.260626	0.993	0.797	2.32518e-12		NDUFS5	2.5234e-20	0.356453	1	0.997	3.3372e-16
HN1	3.53526e-20	-0.422845	0.907	1	4.67539e-16		CDCA8	1.90895e-16	0.253582	0.868	0.529	2.52458e-12		NDUFS3	5.6326e-20	0.339065	0.976	0.87	7.44912e-16
AURKB	5.2974e-20	-0.363114	0.558	0.967	7.00582e-16		PRC1	2.03697e-16	0.318075	0.987	0.807	2.6939e-12		FAU	6.01664e-20	0.363705	1	1	7.95701e-16
CDK1	6.98962e-20	-0.360918	0.523	0.869	9.24378e-16		BTF3	4.30479e-16	-0.309735	1	1	5.69309e-12		NDUFC2	6.63745e-20	0.398346	1	0.972	8.77802e-16
DLGAP5	7.772e-20	-0.262557	0.221	0.655	1.02785e-15		COX5B	3.27328e-15	-0.321691	1	1	4.32891e-11		PCMT1	8.49823e-20	0.37592	0.992	0.855	1.12389e-15
TROAP	1.10115e-19	-0.252936	0.36	0.785	1.45627e-15		ATP5G3	2.00244e-14	-0.432703	1	1	2.64822e-10		POMP	9.26032e-20	0.369824	1	0.991	1.22468e-15
CEP55	1.56006e-19	-0.31972	0.488	0.891	2.06318e-15		HMGB2	2.2416e-14	0.357767	1	0.905	2.96451e-10		UFD1L	1.10542e-19	0.337168	0.992	0.985	1.46191e-15
DEPDC1	4.60178e-19	-0.270468	0.331	0.731	6.08586e-15		CEP55	2.80213e-14	0.261356	0.921	0.641	3.70581e-10		NDUFAB1	1.54462e-19	0.32818	1	0.997	2.04277e-15
SAPCD2	5.54827e-19	-0.342733	0.39	0.789	7.33759e-15		CCNA2	3.24625e-14	0.270942	0.947	0.712	4.29316e-10		SNRPB	1.79439e-19	0.312913	1	0.994	2.37308e-15
PRR11	6.85034e-19	-0.266159	0.384	0.771	9.05957e-15		S100A6	4.27591e-14	-0.466404	1	1	5.6549e-10		NOL7	2.49053e-19	0.29725	1	0.96	3.29372e-15
TUBA1C	7.02166e-19	-0.482622	0.901	0.989	9.28615e-15		CKAP2	6.64758e-14	0.294407	0.934	0.746	8.79143e-10		MRPL40	2.62645e-19	0.336867	1	0.985	3.47348e-15
HMGN2	9.9406e-19	-0.427158	0.988	0.996	1.31464e-14		MT2A	8.138e-14	0.356697	1	0.993	1.07625e-09		GSTO1	2.76306e-19	0.423036	0.984	0.904	3.65415e-15
CCND1	1.26131e-18	-0.492949	0.791	0.971	1.66809e-14		MT1E	8.94876e-14	0.433247	0.993	0.942	1.18347e-09		PSME2	3.08129e-19	0.354579	0.943	0.716	4.075e-15
H2AFX	2.34832e-18	-0.352052	0.744	0.975	3.10565e-14		CDKN3	1.22654e-13	0.355121	0.987	0.854	1.6221e-09		EIF3M	3.70981e-19	0.352495	1	0.966	4.90622e-15
H2AFZ	2.43791e-18	-0.369439	0.994	0.993	3.22414e-14		HSD17B10	1.29222e-13	-0.323718	0.941	0.942	1.70896e-09		FABP5	4.24733e-19	0.44469	1	0.914	5.6171e-15
ANP32E	2.68779e-18	-0.312405	0.68	0.949	3.55461e-14		NME1	1.48105e-13	-0.337152	0.993	0.993	1.95869e-09		MT-CO1	5.31652e-19	-0.387075	0.992	1	7.0311e-15
CDCA8	6.56351e-18	-0.266796	0.401	0.796	8.68024e-14		NDUFS5	1.60187e-13	-0.317083	1	0.997	2.11847e-09		MT-CO3	5.35596e-19	-0.39884	0.992	1	7.08326e-15
CKAP2	6.77634e-18	-0.334409	0.634	0.92	8.9617e-14		TUBB4B	1.76782e-13	0.273455	1	0.99	2.33794e-09		U2AF1	9.47641e-19	0.378648	0.984	0.985	1.25326e-14
PBK	3.3698e-17	-0.287917	0.651	0.971	4.45657e-13		SSR4	2.38749e-13	-0.324677	1	1	3.15746e-09		SNRPD1	9.86811e-19	0.34875	1	0.994	1.30506e-14
MRPL51	4.97557e-17	-0.315667	0.983	1	6.58019e-13		CD63	3.89954e-13	-0.34435	0.987	0.997	5.15714e-09		PSMG1	1.1122e-18	0.314352	0.976	0.821	1.47089e-14
ANP32B	5.00757e-17	-0.292196	0.994	1	6.62251e-13		COX4I1	5.80867e-13	-0.30703	1	1	7.68196e-09		FH	1.12189e-18	0.371145	0.967	0.756	1.48369e-14
PHF19	7.78465e-17	-0.362365	0.698	0.949	1.02952e-12		ARPC3	6.164e-13	-0.319878	0.967	0.99	8.15188e-09		MT-CO2	1.39198e-18	-0.377475	0.976	1	1.8409e-14
TUBB	2.81314e-16	-0.349815	0.983	1	3.72038e-12		CDCA3	7.00659e-13	0.264755	0.914	0.668	9.26622e-09		PPIB	1.51324e-18	0.37117	0.992	0.972	2.00127e-14
HMGB1	1.14821e-15	-0.353037	0.983	1	1.51851e-11		UBB	7.64275e-13	-0.475306	1	0.993	1.01075e-08		SRP14	2.18651e-18	0.307953	1	0.997	2.89166e-14
RANBP1	1.62592e-15	-0.339568	0.994	0.996	2.15028e-11		MT-ATP6	8.70068e-13	0.31631	1	0.99	1.15066e-08		SF3B14	2.57366e-18	0.353676	0.992	0.978	3.40366e-14
KIF5B	2.59921e-15	-0.304753	0.878	0.978	3.43745e-11		EIF3K	1.35482e-12	-0.28555	0.993	0.98	1.79176e-08		RPS29	2.92204e-18	-0.252369	1	1	3.8644e-14
CCT6A	6.21296e-15	-0.360257	0.994	1	8.21664e-11		UBE2C	1.3732e-12	0.339953	0.98	0.79	1.81606e-08		CYC1	3.50025e-18	0.350499	1	0.978	4.62908e-14
TUBA1B	6.51592e-15	-0.316667	0.971	0.996	8.6173e-11		PHF19	1.51286e-12	0.323544	0.961	0.797	2.00076e-08		ATP5H	3.79067e-18	0.30694	1	0.938	5.01316e-14
CKS1B	8.53931e-15	-0.297221	0.965	0.993	1.12932e-10		CCND1	1.95797e-12	0.344907	0.967	0.868	2.58941e-08		CCT6A	5.96202e-18	0.412756	1	0.997	7.88476e-14
HNRNPD	8.59012e-15	-0.255835	0.971	0.989	1.13604e-10		PSMB6	2.4982e-12	-0.313403	0.941	0.969	3.30386e-08		SLC25A5	6.45099e-18	0.402192	1	0.991	8.53143e-14
MT2A	1.31121e-14	-0.36294	0.988	1	1.73407e-10		LINC00460	5.47419e-12	0.313721	0.914	0.769	7.23961e-08		VDAC3	6.48149e-18	0.386449	1	0.944	8.57178e-14
LBR	2.08469e-14	-0.250014	0.674	0.931	2.75701e-10		POMP	1.08985e-11	-0.310221	0.993	0.993	1.44132e-07		PRDX1	8.71033e-18	0.463054	1	1	1.15194e-13
HSP90AA1	2.37088e-14	-0.348612	0.994	1	3.13549e-10		COX5A	1.13151e-11	-0.288977	1	1	1.49642e-07		ATP5G3	9.42115e-18	0.454152	1	1	1.24595e-13
H3F3B	2.57257e-14	-0.297904	0.983	1	3.40223e-10		NDUFA4	1.36431e-11	-0.28945	0.987	0.993	1.8043e-07		UBE2T	1.05053e-17	0.414727	0.992	0.772	1.38933e-13
STMN1	2.59234e-14	-0.379189	0.872	0.996	3.42837e-10		NDUFC2	1.60899e-11	-0.331297	0.974	0.983	2.12789e-07		CYCS	1.26564e-17	0.350938	1	0.988	1.67381e-13
HNRNPA2B1	3.03673e-14	-0.285068	0.977	1	4.01607e-10		RP1-313I6.12	1.78374e-11	0.271737	0.849	0.654	2.35899e-07		COPE	1.27696e-17	0.331178	0.935	0.852	1.68878e-13
FTH1	3.70991e-14	0.516631	1	1	4.90635e-10		SAP18	2.24669e-11	-0.299161	0.974	0.983	2.97124e-07		GMNN	1.29837e-17	0.340672	0.976	0.753	1.7171e-13
EBP	6.30135e-14	-0.274072	0.924	0.996	8.33354e-10		TXN	2.73089e-11	-0.265289	1	1	3.6116e-07		EIF5A	1.63941e-17	0.282053	1	1	2.16811e-13
CLIC1	8.5417e-14	-0.330933	0.959	0.993	1.12964e-09		TPI1	3.26446e-11	-0.284279	1	0.997	4.31725e-07		RNASEH2A	1.67926e-17	0.287873	0.927	0.651	2.22082e-13
SMC2	1.73573e-13	-0.277394	0.756	0.96	2.2955e-09		TXNDC17	5.01953e-11	-0.301479	0.993	0.997	6.63833e-07		SNRPD3	1.72935e-17	0.339818	0.992	0.867	2.28706e-13
FTL	1.74713e-13	0.51701	1	1	2.31058e-09		MGST1	8.38913e-11	-0.313256	1	0.993	1.10946e-06		CDC123	1.80111e-17	0.320441	0.935	0.802	2.38197e-13
MIR205HG	2.3085e-13	-0.385575	0.552	0.851	3.05299e-09		NDUFB11	9.56013e-11	-0.265056	0.987	0.99	1.26433e-06		C4orf27	1.94396e-17	0.267521	0.919	0.654	2.57088e-13
SAC3D1	2.45501e-13	-0.270495	0.797	0.975	3.24675e-09		SMC4	1.02402e-10	0.270775	0.987	0.878	1.35427e-06		NUDT5	2.1748e-17	0.345162	0.935	0.772	2.87617e-13
ACTB	3.19413e-13	-0.291164	0.988	1	4.22423e-09		C1QBP	1.61458e-10	-0.287701	0.993	0.997	2.13528e-06		SNRPD2	2.45113e-17	0.294448	0.992	0.988	3.24161e-13
PPP1CA	3.92549e-13	-0.283047	0.994	1	5.19146e-09		MRPL40	1.68542e-10	-0.275288	0.98	0.993	2.22897e-06		NME1	2.45122e-17	0.361128	0.992	0.994	3.24174e-13
SLC43A3	7.44528e-13	-0.27571	0.843	0.982	9.84638e-09		MT-ND3	2.59709e-10	0.258998	1	0.986	3.43465e-06		MT-ND4	3.11276e-17	-0.342166	0.976	1	4.11663e-13
DNMT1	9.4457e-13	-0.257011	0.727	0.975	1.24919e-08		ATP6V1G1	2.66287e-10	-0.266162	0.987	0.997	3.52164e-06		ETFB	3.91585e-17	0.360103	0.959	0.877	5.17872e-13
SRSF3	1.3566e-12	-0.279028	0.988	0.996	1.7941e-08		AMIGO2	5.3884e-10	0.262028	0.901	0.685	7.12616e-06		BTF3	4.06185e-17	0.253146	1	1	5.3718e-13
MYBL2	2.30275e-12	-0.2705	0.709	0.982	3.04539e-08		GSTO1	6.28069e-10	-0.307614	0.921	0.929	8.30621e-06		DNAJB11	4.86824e-17	0.348496	0.967	0.84	6.43825e-13
DTYMK	2.58879e-12	-0.259859	0.791	0.96	3.42367e-08		H3F3A	1.00053e-09	-0.267143	1	1	1.32321e-05		MT-ND2	5.29518e-17	-0.319425	0.976	1	7.00287e-13
TUBA4A	2.84351e-12	-0.255002	0.715	0.916	3.76054e-08		SSBP1	1.02208e-09	-0.28677	0.816	0.878	1.3517e-05		NDUFB8.1	5.45638e-17	0.313541	0.992	0.932	7.21606e-13
C11orf83	3.19895e-12	-0.294703	0.901	0.989	4.23061e-08		FKBP3	1.05363e-09	-0.294015	0.928	0.932	1.39342e-05		PFDN2	6.57437e-17	0.34621	0.992	0.926	8.6946e-13
CALM2	3.34609e-12	-0.366681	0.988	0.996	4.4252e-08		ATP6V0E1	1.07485e-09	-0.258626	0.895	0.953	1.42148e-05		EMC7	6.91121e-17	0.319341	0.992	0.932	9.14008e-13
RAD23A	3.48161e-12	-0.262142	0.959	0.985	4.60443e-08		SSB	1.17002e-09	-0.29898	0.961	0.973	1.54735e-05		COPS6	8.97606e-17	0.308382	0.967	0.849	1.18708e-12
NEAT1	3.6638e-12	0.532056	0.994	0.982	4.84537e-08		PSMB3	1.3266e-09	-0.312821	0.875	0.885	1.75443e-05		H3F3A	9.28897e-17	0.340141	1	1	1.22847e-12
RAN	4.80596e-12	-0.271539	0.983	1	6.35588e-08		CLTA	1.38209e-09	-0.250073	0.829	0.888	1.82781e-05		EIF3I	1.01939e-16	0.335599	1	0.972	1.34814e-12
TYMS	8.12776e-12	-0.273094	0.773	0.975	1.0749e-07		ATP5C1	1.61324e-09	-0.26293	0.967	0.956	2.13351e-05		DUT	1.02605e-16	0.33805	0.992	0.966	1.35695e-12
KRT18	1.21528e-11	-0.383327	0.965	0.996	1.60721e-07		C14orf166	1.91346e-09	-0.251777	0.987	0.99	2.53054e-05		SKP1	1.86016e-16	0.328833	1	0.972	2.46006e-12
EPCAM	5.21259e-11	-0.292549	0.93	0.996	6.89365e-07		MYL6	2.14489e-09	-0.286186	1	0.99	2.83662e-05		HPRT1	2.89783e-16	0.271742	0.967	0.802	3.83239e-12
UBE2T	6.0501e-11	-0.274324	0.686	0.924	8.00126e-07		COX6C	2.69868e-09	-0.26132	1	1	3.56901e-05		MRPL13	3.24787e-16	0.354025	0.984	0.815	4.29531e-12
VDAC3	1.86776e-10	-0.273413	0.907	0.993	2.47011e-06		HMGN2	2.70505e-09	0.2528	0.993	0.993	3.57743e-05		MANF	4.20345e-16	0.327629	0.959	0.846	5.55906e-12
PHLDA1	5.55921e-10	-0.296978	0.773	0.942	7.35205e-06		SF3B14	3.00039e-09	-0.25661	0.98	0.983	3.96802e-05		RBM8A	4.37795e-16	0.367214	1	0.951	5.78983e-12
SLC16A3	6.71762e-10	-0.301352	0.965	0.996	8.88405e-06		CKS2	4.50864e-09	0.285204	1	0.963	5.96268e-05		CSNK2B	4.46628e-16	0.327391	0.992	0.951	5.90665e-12
PRDX2	1.27348e-09	-0.257486	0.814	0.953	1.68418e-05		THBS1	4.52928e-09	0.275755	0.901	0.719	5.98997e-05		EPCAM	5.29281e-16	0.39336	0.992	0.963	6.99974e-12
KIAA0101	1.29315e-09	-0.276949	0.762	0.989	1.71019e-05		MYL12A	4.63756e-09	-0.314274	0.993	0.993	6.13317e-05		STMN1	5.95308e-16	0.4673	1	0.929	7.87295e-12
CTSC	7.27641e-09	-0.260361	0.924	0.989	9.62305e-05		ANPEP	4.86691e-09	0.253876	0.974	0.841	6.43649e-05		MT-ND1	7.31588e-16	-0.32335	0.992	1	9.67525e-12
FOSL1	7.28963e-09	-0.274217	0.75	0.935	9.64053e-05		NDUFA8	5.66121e-09	-0.253634	0.974	0.983	7.48695e-05		MRPL32	8.52374e-16	0.280199	0.959	0.87	1.12726e-11
RPS4X	9.81671e-09	0.261453	1	1	0.000129826		SNRPB2	5.68611e-09	-0.256848	0.941	0.949	7.51988e-05		SPCS2	9.5974e-16	0.335329	0.984	0.904	1.26926e-11
PSMD2	2.02059e-08	-0.251615	0.913	0.993	0.000267223		COX7B	6.01289e-09	-0.259846	1	1	7.95205e-05		CYBA	1.11867e-15	0.39471	1	0.978	1.47944e-11
PSMA4	1.15065e-07	-0.256832	0.983	0.993	0.00152173		ID3	7.43827e-09	-0.552011	0.967	0.949	9.83711e-05		GADD45GIP1	1.29971e-15	0.314317	1	0.997	1.71886e-11
IER3	2.19093e-07	-0.287493	0.924	0.993	0.00289751		CYBA	7.72795e-09	-0.288746	0.98	0.986	0.000102202		PRDX6	1.53366e-15	0.29494	1	0.963	2.02827e-11
CXCL1	3.17843e-06	-0.385656	0.733	0.862	0.0420348		MT-ND6	8.3211e-09	0.294234	0.993	0.932	0.000110047		PSMA3	1.8707e-15	0.355618	1	0.96	2.47401e-11
							NDUFAB1	1.05691e-08	-0.25316	1	0.997	0.000139777		RFC4	2.29776e-15	0.283443	0.837	0.571	3.03879e-11
							NPM1	1.08862e-08	-0.348314	1	0.993	0.00014397		TIMP1	2.65619e-15	0.37845	1	1	3.51281e-11
							ID1	1.08998e-08	-0.401705	0.947	0.939	0.00014415		EIF6	2.9499e-15	0.27604	1	0.969	3.90124e-11
							LGALS3	1.31399e-08	-0.301596	0.987	0.993	0.000173775		MGST1	3.04949e-15	0.29894	1	0.994	4.03295e-11
							PRDX1	1.51813e-08	-0.353272	1	1	0.000200773		COX5A	3.29943e-15	0.308978	1	1	4.36349e-11
							MRPL13	3.20083e-08	-0.253084	0.816	0.885	0.000423309		CISD1	3.48982e-15	0.299456	0.959	0.867	4.61529e-11
							MYL12B	5.54004e-08	-0.275545	1	0.99	0.00073267		ILF2	3.972e-15	0.266425	0.967	0.824	5.25297e-11
							ID2	6.00577e-08	-0.354778	0.803	0.871	0.000794263		UBA52	5.07992e-15	0.25906	1	1	6.7182e-11
							EREG	9.46867e-08	0.253767	0.796	0.647	0.00125223		NDUFB4	5.3865e-15	0.311691	1	0.988	7.12365e-11
							PSMA4	1.06777e-07	-0.33934	0.987	0.99	0.00141213		VPS29	5.93901e-15	0.301948	0.967	0.852	7.85434e-11
							CACYBP	1.73961e-07	-0.280501	0.954	0.939	0.00230063		PRMT1	7.7533e-15	0.36132	0.959	0.833	1.02537e-10
							PSMB1	2.4666e-07	-0.297063	0.987	0.986	0.00326208		TIMM10	9.10762e-15	0.296626	1	0.991	1.20448e-10
							LDHB	1.01985e-06	-0.277453	1	0.997	0.0134875		FAM162A	9.19388e-15	0.274537	0.943	0.821	1.21589e-10
							MAP1LC3B	1.29009e-06	-0.279641	0.849	0.881	0.0170614		MRPL47	1.05254e-14	0.297626	0.935	0.778	1.39198e-10
							KRT81	1.49119e-06	-0.270797	1	0.997	0.0197211		COX4I1	1.171e-14	0.287124	1	1	1.54865e-10
							KRT7	1.72661e-06	-0.270286	1	0.99	0.0228345		CNIH4	1.19745e-14	0.305983	0.992	0.978	1.58363e-10
							IER3	2.13877e-06	0.256015	1	0.949	0.0282853		NIT2	1.21039e-14	0.29307	0.959	0.809	1.60074e-10
							EBNA1BP2	3.52184e-06	-0.255282	0.98	0.973	0.0465763		PSMD8	1.2374e-14	0.282558	0.992	0.941	1.63647e-10
														GLRX3	1.46236e-14	0.305743	0.967	0.883	1.93398e-10
														TXNL1	1.79165e-14	0.306464	0.992	0.917	2.36946e-10
														NDUFV2	1.94228e-14	0.255022	1	0.991	2.56867e-10
														UCHL3	1.94501e-14	0.253158	0.967	0.849	2.57227e-10
														MT-ATP6	2.27763e-14	-0.399601	0.976	1	3.01217e-10
														CBR1	2.53877e-14	0.309631	0.992	0.892	3.35752e-10
														EXOSC8	2.58392e-14	0.260781	0.902	0.651	3.41724e-10
														NQO1	3.29981e-14	0.350946	0.951	0.772	4.364e-10
														NDUFA12	4.07187e-14	0.292052	0.976	0.957	5.38505e-10
														PSMG2	4.50167e-14	0.263212	0.992	0.873	5.95346e-10
														ADRM1	4.74304e-14	0.292345	1	0.981	6.27267e-10
														ATP5F1	5.53157e-14	0.286143	1	0.981	7.3155e-10
														PTMA	6.90815e-14	0.302255	1	1	9.13603e-10
														PSMD14	7.21175e-14	0.326432	1	0.96	9.53755e-10
														YWHAB	1.09135e-13	0.251646	1	0.994	1.44331e-09
														PSMB7	1.20871e-13	0.314366	1	0.985	1.59852e-09
														CCT2	1.27659e-13	0.293375	0.992	0.957	1.68829e-09
														MT-ND5	1.30182e-13	-0.258797	0.967	1	1.72166e-09
														AIMP1	1.38088e-13	0.280188	0.967	0.846	1.82621e-09
														PSMB2	1.4168e-13	0.319121	0.984	0.951	1.87372e-09
														TMEM205	1.46057e-13	0.283145	0.984	0.914	1.9316e-09
														PHB	1.50004e-13	0.269421	0.992	0.975	1.9838e-09
														PPP1CA	1.58591e-13	0.305657	1	0.997	2.09737e-09
														UBE2V2	1.71308e-13	0.276355	0.967	0.948	2.26554e-09
														CTSC	1.84712e-13	0.374081	0.992	0.954	2.44282e-09
														TRMT6	1.8844e-13	0.289754	0.943	0.818	2.49212e-09
														EIF5	1.89384e-13	0.293938	1	0.957	2.50461e-09
														MDH2	1.9773e-13	0.258717	0.976	0.969	2.61497e-09
														PSMA1	2.37408e-13	0.28456	0.992	0.951	3.13973e-09
														EIF3K	2.84648e-13	0.284757	1	0.978	3.76447e-09
														RRP7A	2.89551e-13	0.271277	0.984	0.917	3.82932e-09
														SRSF7	3.00629e-13	0.296347	0.992	0.972	3.97582e-09
														H2AFZ	3.0907e-13	0.318018	0.992	0.994	4.08745e-09
														EMG1	3.17728e-13	0.338884	0.959	0.951	4.20196e-09
														NAA20	3.42539e-13	0.267675	0.984	0.92	4.53008e-09
														COMT	4.05191e-13	0.286156	0.984	0.944	5.35865e-09
														MT-CYB	4.21171e-13	-0.347794	0.959	1	5.56998e-09
														SLC25A4	4.69279e-13	0.291944	1	0.892	6.20621e-09
														TXN	5.23486e-13	0.251048	1	1	6.92311e-09
														MRPL21	5.29406e-13	0.269326	1	0.957	7.00139e-09
														VDAC2	5.45879e-13	0.278422	1	0.969	7.21925e-09
														SLIRP	7.50691e-13	0.294335	1	0.991	9.92789e-09
														PSMA5	7.55551e-13	0.288195	0.967	0.907	9.99216e-09
														PFN1	8.11427e-13	0.297126	1	1	1.07311e-08
														SNRPA1	8.2823e-13	0.295777	0.976	0.923	1.09533e-08
														REXO2	9.90706e-13	0.262156	0.984	0.861	1.31021e-08
														ATP5B	1.03005e-12	0.336186	0.992	0.981	1.36224e-08
														MRPL16	1.09879e-12	0.250465	0.967	0.818	1.45315e-08
														TPM2	1.21856e-12	0.309563	0.992	0.901	1.61155e-08
														CLSPN	1.50434e-12	0.287103	0.959	0.762	1.98949e-08
														EIF4A1	1.52377e-12	0.389487	1	1	2.01519e-08
														BANF1	1.73051e-12	0.270038	0.992	0.938	2.2886e-08
														SLC25A3	1.94029e-12	0.280941	1	0.978	2.56604e-08
														CALM1	2.2739e-12	0.279991	0.992	0.988	3.00724e-08
														PRDX5	2.48291e-12	0.268571	1	1	3.28365e-08
														NDUFB11	3.15472e-12	0.268807	1	0.985	4.17212e-08
														NEAT1	3.16385e-12	-0.553228	0.959	0.997	4.18419e-08
														TPRKB	3.18654e-12	0.261207	1	0.907	4.2142e-08
														MT-ND3	4.07435e-12	-0.328493	0.967	1	5.38832e-08
														SUB1	4.31493e-12	0.255367	1	0.96	5.7065e-08
														KRT81	4.7364e-12	0.399866	0.992	1	6.26389e-08
														ENO1	4.7364e-12	0.302955	1	1	6.26389e-08
														HNRNPDL	4.86055e-12	0.274357	0.992	0.978	6.42807e-08
														SRSF3	5.01812e-12	0.32115	1	0.991	6.63647e-08
														ACTB	7.23157e-12	0.29626	1	0.994	9.56375e-08
														ATP5O	7.61729e-12	0.269588	0.976	0.944	1.00739e-07
														CD63	8.70969e-12	0.2893	1	0.991	1.15186e-07
														PSMD6	9.70056e-12	0.29551	0.911	0.753	1.2829e-07
														CHCHD2	2.0251e-11	0.280382	1	1	2.67819e-07
														TUBA1B	2.80902e-11	0.34678	0.992	0.985	3.71493e-07
														NDUFA8	3.0962e-11	0.280172	0.984	0.978	4.09472e-07
														ANXA2	3.44158e-11	0.326277	1	0.988	4.55149e-07
														GLRX2	3.6414e-11	0.259549	0.927	0.799	4.81575e-07
														KRT18	3.73989e-11	0.427225	0.992	0.981	4.946e-07
														TUBA4A	3.96744e-11	0.267895	0.943	0.799	5.24694e-07
														KRT7	4.08658e-11	0.355609	1	0.991	5.40451e-07
														FRG1	4.57063e-11	0.251811	0.943	0.793	6.04465e-07
														S100A10	5.18063e-11	0.304959	1	1	6.85139e-07
														NHP2L1	5.65689e-11	0.279588	1	1	7.48124e-07
														SUCLG1	6.19471e-11	0.257448	0.935	0.759	8.1925e-07
														CLDN7	6.63488e-11	0.306869	0.951	0.861	8.77462e-07
														NAE1	7.35158e-11	0.25598	0.992	0.957	9.72247e-07
														ERH	8.99923e-11	0.269279	1	0.972	1.19015e-06
														SNRPF	9.95141e-11	0.267476	0.992	0.985	1.31607e-06
														NUDC	1.39497e-10	0.267688	1	0.991	1.84485e-06
														TXNDC17	1.41768e-10	0.256463	1	0.994	1.87488e-06
														H3F3B	1.42149e-10	0.271154	1	0.991	1.87992e-06
														TALDO1	1.50999e-10	0.260258	0.967	0.932	1.99697e-06
														PDIA6	1.66553e-10	0.274725	1	0.994	2.20266e-06
														LDHA	1.66992e-10	0.36488	0.992	0.985	2.20848e-06
														CALM2	2.47205e-10	0.413555	0.992	0.994	3.26929e-06
														SBDS	4.94172e-10	0.341741	0.992	0.972	6.53543e-06
														HSPE1	5.76504e-10	0.263592	1	0.997	7.62426e-06
														MYL6	1.18731e-09	0.269473	1	0.991	1.57022e-05
														FTL	1.94394e-09	-0.409746	1	1	2.57086e-05
														SSB	2.26574e-09	0.323079	0.992	0.96	2.99644e-05
														PSMC3	2.26776e-09	0.314647	0.992	0.935	2.99912e-05
														PCNA	2.87042e-09	0.344229	0.959	0.873	3.79613e-05
														S100A11	3.16314e-09	0.333506	1	0.994	4.18325e-05
														PDIA3	4.44608e-09	0.253616	0.984	0.938	5.87994e-05
														FTH1	5.45319e-09	-0.410006	1	1	7.21184e-05
														ARPC5	6.05949e-09	0.267628	0.992	0.978	8.01368e-05
														PTTG1	1.53086e-08	0.408236	0.886	0.694	0.000202457
														HN1	1.94966e-08	0.277409	1	0.951	0.000257843
														UBE2C	5.21319e-08	0.39924	0.967	0.812	0.000689445
														PSMB5	6.33529e-08	0.255869	0.992	0.944	0.000837843
														CKS2	7.64599e-08	0.292476	0.992	0.969	0.00101118
														CDKN3	1.07237e-07	0.302831	0.992	0.864	0.00141821
														ANXA3	1.09285e-07	0.252028	0.902	0.772	0.00144529
														MGP	1.21131e-07	0.355146	0.862	0.698	0.00160196
														BRI3	1.25654e-07	-0.260547	0.992	0.985	0.00166177
														HMGB3	1.27351e-07	0.290573	0.976	0.867	0.00168422
														KIAA0101	1.40165e-07	0.250327	0.992	0.867	0.00185368
														TUBB4B	1.54986e-07	0.345716	1	0.991	0.00204968
														RPL22L1	3.73593e-07	0.276457	0.992	0.944	0.00494077
														S100A2	7.73384e-07	0.259997	0.992	0.997	0.010228
														LCN2	1.21149e-06	0.361218	0.919	0.818	0.016022
														CDC20	1.34852e-06	0.2924	0.943	0.79	0.0178342
														KRT8	3.04541e-06	0.292045	1	0.988	0.0402755

## Sheet: SUM149PR clusters
CLUSTER 0							CLUSTER 1							CLUSTER 2							CLUSTER 3							CLUSTER 4							CLUSTER 5
gene	p_val	avg_logFC	pct.1	pct.2	p_val_adj		gene	p_val	avg_logFC	pct.1	pct.2	p_val_adj		gene	p_val	avg_logFC	pct.1	pct.2	p_val_adj		gene	p_val	avg_logFC	pct.1	pct.2	p_val_adj		gene	p_val	avg_logFC	pct.1	pct.2	p_val_adj		gene	p_val	avg_logFC	pct.1	pct.2	p_val_adj
KRT19	0	0.928699	0.94	0.729	0		UBE2C	0	0.772968	0.887	0.488	0		TOP2A	3.92532e-212	-0.823678	0.186	0.595	6.02222e-208		HIST1H4C	0	0.822211	0.991	0.821	0		RPL29	0	0.52264	0.997	0.994	0		VIM	0	1.25836	0.919	0.492	0
EEF1A1	0	0.438759	0.999	0.997	0		PLK1	0	0.723356	0.86	0.337	0		UBE2C	4.01361e-174	-0.787534	0.281	0.629	6.15769e-170		HIST1H1B	2.45204e-155	0.388752	0.42	0.137	3.76192e-151		MT2A	6.52773e-205	-0.693211	0.998	0.995	1.00148e-200		S100A2	0	-0.874443	0.946	0.995	0
RPS12	0	-0.385125	0.999	1	0		AURKA	0	0.717125	0.921	0.45	0		HIST1H4C	4.06603e-151	-0.91076	0.762	0.867	6.23811e-147		FAM111A	3.05285e-74	0.262208	0.453	0.226	4.68368e-70		EEF1A1	3.12491e-153	-0.404065	0.996	0.997	4.79423e-149		KRT18	0	-0.994887	0.803	0.982	0
S100A14	4.75086e-299	0.677219	0.929	0.704	7.28876e-295		TOP2A	0	0.706858	0.898	0.43	0		HSPA8	1.6557e-138	-0.421169	0.894	0.963	2.54018e-134		PCNA	2.1021e-70	0.290562	0.749	0.508	3.22504e-66		SEC61G	3.24814e-151	-0.437379	0.925	0.977	4.98329e-147		SFRP1	0	-1.17364	0.147	0.787	0
VIM	1.69549e-276	-1.14441	0.199	0.633	2.60122e-272		CKS2	0	0.599389	0.987	0.766	0		MKI67	4.83702e-124	-0.515482	0.245	0.565	7.42096e-120		ATAD2	3.77559e-70	0.286545	0.677	0.429	5.79252e-66		CHCHD2	6.85035e-114	-0.299686	0.987	0.993	1.05098e-109		EPCAM	0	-1.20819	0.14	0.817	0
COX7A2	1.16641e-257	0.512831	0.957	0.843	1.78951e-253		TUBB4B	0	0.464569	0.999	0.969	0		AURKA	5.49115e-117	-0.546679	0.295	0.597	8.42452e-113		AKAP12	5.37391e-69	0.310541	0.506	0.277	8.24466e-65		TPT1	1.31797e-100	-0.252935	0.998	0.999	2.02203e-96		S100A14	0	-1.52148	0.11	0.833	0
S100P	3.92372e-246	0.656149	0.906	0.69	6.01978e-242		CENPF	1.6637e-299	0.623092	0.928	0.526	2.55245e-295		NUSAP1	2.82064e-114	-0.500309	0.218	0.527	4.32742e-110		CCNB1	9.17709e-64	-0.4668	0.627	0.686	1.40795e-59		RPL22L1	3.24485e-100	-0.688297	0.579	0.767	4.97825e-96		KRT19	0	-1.71755	0.213	0.845	0
S100A10	1.55944e-176	0.42003	0.976	0.929	2.39249e-172		UBE2S	2.42203e-296	0.502537	0.996	0.87	3.71588e-292		AURKB	9.40826e-113	-0.448146	0.198	0.516	1.44342e-108		RPL22L1	4.03579e-55	0.327292	0.871	0.716	6.19171e-51		SLC25A6	5.66391e-92	-0.38203	0.754	0.894	8.68956e-88		FTL	6.35878e-245	0.609808	1	0.998	9.75564e-241
TUBB	8.07707e-174	-0.384074	0.946	0.975	1.23918e-169		ASPM	1.05677e-273	0.584161	0.864	0.438	1.6213e-269		CDK1	3.82441e-109	-0.437757	0.117	0.408	5.86741e-105		CDC20	3.08189e-34	-0.348095	0.626	0.65	4.72823e-30		EEF1A2	1.38141e-87	0.442085	0.72	0.478	2.11935e-83		CYR61	4.11982e-238	0.933944	0.559	0.174	6.32062e-234
CENPF	1.79698e-164	-0.629267	0.356	0.675	2.75693e-160		HMMR	1.19043e-268	0.550221	0.797	0.357	1.82636e-264		CENPF	1.13178e-92	-0.508812	0.397	0.65	1.73638e-88		PTTG1	9.3196e-27	-0.272354	0.6	0.634	1.42981e-22		TIMP1	9.16017e-87	-0.423396	0.983	0.993	1.40535e-82		SFN	1.65712e-212	-0.818991	0.484	0.87	2.54236e-208
S100A2	2.28473e-156	0.397955	0.996	0.987	3.50524e-152		TPX2	1.60223e-256	0.546125	0.914	0.541	2.45814e-252		TUBB4B	4.19256e-89	-0.311034	0.941	0.982	6.43222e-85		S100P	9.54402e-27	-0.33488	0.718	0.74	1.46424e-22		SSBP1	7.51975e-83	0.367305	0.855	0.722	1.15368e-78		S100A10	9.31032e-209	-0.703137	0.779	0.959	1.42839e-204
UBE2S	3.23581e-153	-0.459184	0.799	0.921	4.96438e-149		CCNB1	8.74591e-254	0.517523	0.948	0.608	1.3418e-249		TUBA1C	7.15207e-89	-0.356785	0.783	0.897	1.09727e-84		TSC22D1	7.47961e-20	-0.28536	0.511	0.562	1.14752e-15		HTRA1	1.83158e-80	-0.450631	0.507	0.741	2.81001e-76		KRT6A	3.12884e-201	-0.989382	0.184	0.69	4.80027e-197
S100A6	2.94532e-148	0.285842	1	0.998	4.51871e-144		PIF1	1.27207e-246	0.389796	0.371	0.077	1.95161e-242		HMGB2	3.72092e-87	-0.392392	0.456	0.719	5.70864e-83		KRT19	1.4918e-13	-0.421318	0.807	0.768	2.28872e-09		FBXO2	2.56084e-78	0.379216	0.775	0.607	3.92884e-74		KRT81	4.7369e-200	-0.483077	0.995	0.999	7.26735e-196
KRT6A	2.24209e-145	0.560474	0.792	0.59	3.43982e-141		TUBA1C	1.73677e-243	0.472441	0.97	0.854	2.66455e-239		HMMR	7.65216e-83	-0.385046	0.222	0.493	1.17399e-78		SAT1	6.12399e-13	-0.283291	0.678	0.682	9.39542e-09		VIM	2.68919e-78	-0.720587	0.309	0.575	4.12576e-74		CAMK2N1	7.35853e-192	-0.898433	0.1	0.595	1.12895e-187
UBE2C	2.79019e-135	-0.623337	0.355	0.627	4.2807e-131		CDC20	9.98761e-242	0.506966	0.925	0.575	1.5323e-237		PLK1	3.73688e-82	-0.435613	0.229	0.487	5.73311e-78		CYP1B1	1.18617e-12	-0.321778	0.232	0.294	1.81982e-08		AKR1B1	2.09171e-75	0.313997	0.779	0.595	3.2091e-71		MME	2.37806e-186	0.411164	0.228	0.027	3.64841e-182
KRT7	6.13009e-122	0.255444	1	0.993	9.40479e-118		NUSAP1	1.69956e-229	0.486764	0.81	0.389	2.60746e-225		KPNA2	4.14882e-81	-0.446388	0.33	0.579	6.36512e-77									COX7A2	2.61832e-66	-0.37721	0.812	0.876	4.01703e-62		TNFAIP6	7.7014e-186	0.56863	0.178	0.014	1.18155e-181
TOP2A	1.39584e-120	-0.52851	0.305	0.584	2.1415e-116		KPNA2	1.93763e-222	0.564883	0.822	0.463	2.97271e-218		ASPM	7.31623e-81	-0.41037	0.303	0.57	1.12246e-76									GDPD3	7.92698e-66	0.301173	0.279	0.112	1.21616e-61		S100A16	8.42229e-185	-0.592976	0.823	0.968	1.29215e-180
TPX2	3.98179e-113	-0.435585	0.405	0.674	6.10885e-109		DLGAP5	1.226e-218	0.456781	0.709	0.3	1.88093e-214		TPX2	3.59184e-78	-0.387136	0.41	0.66	5.51059e-74									AREG	1.11538e-64	-0.430584	0.236	0.485	1.71122e-60		CPM	1.97607e-175	0.50027	0.271	0.045	3.03168e-171
KRT6B	1.29749e-110	0.47402	0.387	0.183	1.99062e-106		CENPA	7.92868e-206	0.38227	0.499	0.162	1.21642e-201		CALM2	6.00967e-78	-0.317723	0.757	0.89	9.22003e-74									SERBP1	8.1162e-62	0.255756	0.965	0.93	1.24519e-57		CLDN7	5.06638e-164	-0.762028	0.31	0.719	7.77285e-160
PLK1	1.69721e-107	-0.445848	0.226	0.501	2.60386e-103		AURKB	7.47217e-204	0.444225	0.777	0.381	1.14638e-199		HSPA1A	4.53228e-73	-0.35913	0.212	0.463	6.95343e-69									SRM	1.00994e-60	0.26012	0.97	0.923	1.54945e-56		CCND1	4.98126e-161	-0.744358	0.205	0.659	7.64224e-157
GPRC5A	9.16646e-107	0.459568	0.679	0.505	1.40632e-102		GTSE1	2.4507e-200	0.375963	0.584	0.217	3.75986e-196		PRC1	1.22368e-70	-0.345654	0.309	0.562	1.87737e-66									LGALS1	5.1087e-59	-0.293596	0.962	0.981	7.83777e-55		DKK1	9.95367e-161	0.928599	0.758	0.512	1.52709e-156
CKS2	1.35519e-102	-0.384382	0.695	0.842	2.07914e-98		ARL6IP1	6.43222e-200	0.402134	0.603	0.232	9.86831e-196		GTSE1	2.13873e-67	-0.290309	0.109	0.329	3.28124e-63									PID1	2.38852e-57	0.338175	0.459	0.262	3.66447e-53		BGN	2.58105e-159	0.489896	0.243	0.039	3.95985e-155
NEAT1	7.23969e-102	0.358027	0.982	0.965	1.11071e-97		KIF2C	2.66014e-196	0.366036	0.457	0.142	4.08119e-192		CKAP2	3.19706e-66	-0.310012	0.142	0.368	4.90493e-62									DFFA	4.61293e-56	0.348327	0.586	0.41	7.07716e-52		MAL2	2.24951e-154	-0.70069	0.043	0.484	3.45119e-150
ANXA1	4.67674e-101	0.306567	0.956	0.92	7.17505e-97		MKI67	1.60102e-191	0.458278	0.805	0.435	2.45628e-187		NCAPG	1.89834e-63	-0.281521	0.15	0.372	2.91244e-59									SNCG	2.46327e-55	0.326062	0.446	0.251	3.77915e-51		AKR1B1	2.51917e-154	0.804858	0.81	0.596	3.86491e-150
NUSAP1	2.38602e-93	-0.377114	0.268	0.53	3.66064e-89		FAM83D	1.17839e-188	0.360583	0.465	0.151	1.80789e-184		UBE2T	1.40582e-62	-0.313795	0.388	0.622	2.15681e-58									KRT5	9.0141e-53	0.388995	0.494	0.31	1.38294e-48		ID3	2.18598e-143	0.656597	0.922	0.816	3.35373e-139
PSCA	4.09997e-90	0.457307	0.374	0.194	6.29018e-86		CDCA3	4.96384e-183	0.382767	0.638	0.267	7.61552e-179		KIF23	2.8477e-61	-0.270933	0.095	0.293	4.36894e-57									ENAH	3.33941e-51	0.306374	0.734	0.586	5.12332e-47		SPINT2	5.47173e-141	-0.640665	0.143	0.574	8.39473e-137
NUCKS1	1.02694e-89	-0.300654	0.816	0.927	1.57553e-85		PRC1	6.23237e-175	0.425865	0.814	0.444	9.5617e-171		FAM83D	1.96369e-58	-0.254677	0.065	0.246	3.0127e-54									NUDC	1.91498e-47	0.258173	0.905	0.851	2.93797e-43		GPRC5A	1.61639e-134	-0.714882	0.183	0.588	2.47986e-130
LCN2	2.8585e-89	0.539735	0.487	0.302	4.38551e-85		CENPE	1.11384e-163	0.334365	0.483	0.172	1.70885e-159		ARL6IP1	1.97752e-58	-0.287051	0.136	0.343	3.03391e-54									ID3	1.69356e-46	0.294671	0.902	0.816	2.59825e-42		FBXO32	5.6632e-131	0.8807	0.363	0.112	8.68849e-127
AURKA	3.90354e-89	-0.418695	0.355	0.597	5.98881e-85		KNSTRN	2.59692e-163	0.396629	0.683	0.328	3.98419e-159		HIST1H1B	8.45479e-58	-0.278305	0.045	0.213	1.29713e-53									RBM28	1.40803e-45	0.277606	0.419	0.249	2.1602e-41		UPP1	2.64264e-127	-0.660084	0.369	0.73	4.05434e-123
EFEMP1	6.11667e-88	-0.350542	0.08	0.296	9.3842e-84		CALM2	9.90009e-159	0.35746	0.971	0.841	1.51887e-154		RRM2	1.18981e-57	-0.306353	0.333	0.565	1.82541e-53									PARP1	3.5041e-45	0.257306	0.887	0.825	5.37599e-41		S100P	9.23585e-127	-0.690179	0.4	0.779	1.41696e-122
EEF1A2	4.04655e-86	-0.418051	0.311	0.564	6.20821e-82		CDKN3	2.32468e-154	0.362905	0.966	0.754	3.56653e-150		CKS2	8.67214e-57	-0.283556	0.701	0.833	1.33048e-52									MT1E	5.97493e-43	-0.376911	0.724	0.808	9.16674e-39		MYL9	3.84132e-125	0.342118	0.192	0.03	5.89335e-121
FXYD3	4.08477e-84	0.446541	0.448	0.273	6.26686e-80		HMGB2	4.33414e-152	0.395329	0.924	0.61	6.64943e-148		CDCA3	1.20307e-47	-0.25245	0.18	0.376	1.84575e-43									HMGA1	1.19011e-42	-0.259595	0.886	0.919	1.82587e-38		LCN2	3.4235e-116	-0.750374	0.027	0.382	5.25234e-112
ASPM	1.89168e-80	-0.371721	0.332	0.576	2.90222e-76		CDK1	1.37562e-149	0.381781	0.619	0.292	2.11048e-145		KRT6A	6.78158e-44	-0.377336	0.493	0.663	1.04043e-39									NPC2	5.68259e-41	-0.287523	0.641	0.774	8.71823e-37		TMEM238	4.75617e-113	-0.568962	0.19	0.567	7.29692e-109
CAMK2N1	3.66544e-79	0.371802	0.663	0.506	5.62352e-75		CKAP2	2.93966e-147	0.366435	0.591	0.263	4.51003e-143		S100P	8.63304e-41	-0.326759	0.621	0.76	1.32448e-36									ADIRF	9.1952e-41	0.300104	0.363	0.209	1.41073e-36		CTGF	5.86921e-111	0.433617	0.264	0.066	9.00454e-107
HMGB2	5.64676e-79	-0.325656	0.491	0.723	8.66326e-75		CCNA2	1.24487e-146	0.351589	0.645	0.306	1.90987e-142		KRT19	1.05454e-38	-0.528709	0.706	0.788	1.61787e-34									ATP6V1F	2.08216e-40	0.265497	0.814	0.719	3.19445e-36		EFEMP1	8.118e-111	0.58136	0.484	0.22	1.24546e-106
KRT18	1.5381e-78	0.262096	0.987	0.955	2.35975e-74		CDCA8	1.03547e-142	0.301998	0.437	0.158	1.58861e-138		PSCA	1.01219e-33	-0.263028	0.12	0.256	1.5529e-29									RP11-792A8.4	6.10391e-38	-0.294523	0.296	0.487	9.36462e-34		DMKN	6.73879e-110	-0.509481	0.439	0.769	1.03387e-105
DKK1	1.35309e-77	-0.474049	0.357	0.589	2.07591e-73		NUF2	1.48147e-141	0.296489	0.469	0.178	2.27287e-137		IER3	4.92168e-28	0.347395	0.861	0.836	7.55085e-24									SERINC2	7.14318e-38	-0.323409	0.42	0.588	1.09591e-33		TFPI2	3.42294e-100	0.558547	0.347	0.125	5.25147e-96
DEK	4.92731e-77	-0.295239	0.752	0.877	7.55948e-73		HSPA8	4.1998e-138	0.327541	0.995	0.94	6.44334e-134		TSC22D1	4.85945e-23	0.280511	0.599	0.544	7.45536e-19									RRAD	1.05451e-37	0.251039	0.148	0.054	1.61783e-33		CXCL1	3.91697e-100	0.932538	0.689	0.474	6.00942e-96
CCDC85B	3.58981e-71	-0.31175	0.773	0.906	5.50748e-67		KIF14	2.08157e-137	0.276789	0.388	0.133	3.19354e-133		SPINK6	5.18803e-20	-0.321458	0.049	0.126	7.95947e-16									IL18	2.78446e-37	0.294827	0.544	0.397	4.27192e-33		DCN	1.46644e-97	0.365457	0.115	0.013	2.24982e-93
AKR1B1	1.18192e-68	-0.3962	0.452	0.665	1.81331e-64		PRR11	1.60995e-133	0.288622	0.474	0.187	2.46999e-129		INHBA	1.19242e-13	0.264967	0.285	0.221	1.82942e-09									SLPI	6.09248e-36	0.260462	0.751	0.641	9.34708e-32		ANXA3	1.89903e-96	-0.549727	0.161	0.504	2.91349e-92
MKI67	2.83916e-67	-0.319425	0.333	0.557	4.35584e-63		DYNLL1	1.61414e-131	0.28626	0.992	0.929	2.47642e-127		ZFAS1	3.17737e-12	0.254997	0.726	0.723	4.87473e-08									SPINK6	2.70988e-34	0.341866	0.21	0.098	4.1575e-30		MALAT1	7.0746e-96	0.540713	1	0.998	1.08539e-91
LGALS3	1.42389e-65	0.288336	0.888	0.837	2.18453e-61		KIF23	2.31946e-129	0.287434	0.49	0.201	3.55851e-125		AKAP12	1.75703e-11	0.280244	0.357	0.306	2.69563e-07									TXNL4A	1.34009e-32	-0.262138	0.531	0.681	2.05597e-28		CYP1B1	1.73481e-94	0.882806	0.492	0.257	2.66154e-90
SFRP1	1.04057e-63	0.316053	0.804	0.692	1.59645e-59		HN1	6.06436e-128	0.339832	0.941	0.758	9.30395e-124																IER3	1.02374e-30	-0.30624	0.769	0.851	1.57063e-26		TPM2	2.51646e-94	0.473097	0.907	0.82	3.86075e-90
CCNB1	3.27123e-63	-0.289946	0.522	0.718	5.01872e-59		PTTG1	1.49962e-127	0.333624	0.879	0.566	2.30071e-123																DCBLD2	4.69645e-30	-0.251247	0.292	0.458	7.2053e-26		ARHGAP29	5.82049e-94	-0.506029	0.408	0.731	8.92979e-90
AURKB	3.51267e-63	-0.28499	0.287	0.508	5.38913e-59		UBALD2	8.11548e-126	0.253633	0.407	0.15	1.24508e-121																LCN2	3.21767e-29	-0.390322	0.212	0.362	4.93655e-25		CDH2	8.52455e-93	0.263866	0.179	0.036	1.30784e-88
GTSE1	1.074e-62	-0.251546	0.135	0.333	1.64773e-58		CDC25B	2.50113e-125	0.318071	0.577	0.27	3.83724e-121																INHBA	5.03541e-29	-0.274296	0.111	0.251	7.72533e-25		CD9	1.18131e-91	-0.506464	0.238	0.583	1.81237e-87
JUN	3.92419e-61	0.389194	0.444	0.291	6.02048e-57		NDC80	1.8282e-120	0.279927	0.416	0.163	2.80482e-116																KRT6B	2.63023e-28	-0.270797	0.109	0.245	4.0353e-24		FXYD3	1.23758e-91	-0.537242	0.038	0.345	1.8987e-87
TMSB4X	4.62843e-61	0.288417	0.917	0.893	7.10094e-57		TACC3	1.97737e-120	0.289035	0.554	0.251	3.03368e-116																IFITM2	1.11521e-27	0.253015	0.51	0.378	1.71096e-23		LAD1	6.3793e-91	-0.448627	0.018	0.316	9.78713e-87
BIRC5	7.44989e-61	-0.269834	0.427	0.651	1.14296e-56		BIRC5	1.56531e-112	0.333661	0.848	0.542	2.4015e-108																JUN	5.62387e-27	-0.265687	0.195	0.344	8.62814e-23		CAPG	1.54438e-89	-0.478903	0.493	0.781	2.36939e-85
HMMR	7.73528e-61	-0.298204	0.277	0.492	1.18675e-56		H1FX	3.877e-112	0.295325	0.58	0.284	5.9481e-108																MT1X	7.53263e-26	-0.286755	0.473	0.616	1.15566e-21		LAMA3	4.27333e-89	-0.517778	0.035	0.334	6.55615e-85
CDCA3	1.68767e-59	-0.252234	0.181	0.386	2.58922e-55		CEP55	1.03861e-103	0.260601	0.49	0.22	1.59343e-99																AKAP12	1.32054e-25	-0.341223	0.197	0.333	2.02597e-21		PERP	5.17272e-88	-0.489561	0.255	0.587	7.93599e-84
SSR3	2.00688e-58	-0.25113	0.665	0.838	3.07896e-54		CCND1	7.53816e-92	0.316206	0.823	0.554	1.1565e-87																KRT19	2.61726e-24	0.254477	0.867	0.76	4.0154e-20		ATP5G2	1.54282e-86	0.447046	0.801	0.63	2.367e-82
KPNA2	1.14439e-56	-0.34606	0.383	0.577	1.75573e-52		CKS1B	5.01856e-88	0.27878	0.883	0.637	7.69947e-84																FN1	3.43762e-23	-0.276758	0.238	0.375	5.27399e-19		MYL6	1.86269e-85	0.32021	0.991	0.972	2.85774e-81
TYMS	2.7522e-54	-0.255603	0.404	0.613	4.22243e-50		HSPA1A	1.49883e-85	0.290587	0.64	0.364	2.2995e-81																CYP1B1	6.78824e-19	-0.344838	0.189	0.298	1.04145e-14		LGALS3	5.74666e-83	-0.421863	0.67	0.87	8.81652e-79
RAMP1	1.26679e-53	-0.28139	0.241	0.438	1.94351e-49		HMGB3	3.87042e-77	0.258853	0.792	0.524	5.938e-73																							LAMB3	1.88532e-82	-0.587893	0.245	0.559	2.89246e-78
DUSP23	4.65111e-52	-0.299774	0.487	0.682	7.13573e-48		SMC4	1.65605e-72	0.250856	0.774	0.5	2.54071e-68																							GJB3	4.56286e-81	-0.431834	0.038	0.32	7.00034e-77
CD55	3.06688e-50	0.340084	0.46	0.334	4.7052e-46		NEAT1	1.31343e-66	-0.41642	0.966	0.97	2.01506e-62																							FBXO2	5.49044e-80	-0.448642	0.342	0.666	8.42343e-76
CAPG	5.88582e-47	0.260148	0.788	0.738	9.03003e-43		CAMK2N1	3.01649e-60	0.257912	0.729	0.492	4.6279e-56																							FGFBP1	6.50381e-78	-0.544447	0.048	0.323	9.97814e-74
BHLHE41	4.99948e-44	0.285164	0.234	0.125	7.6702e-40		FTH1	5.3777e-57	-0.288115	1	1	8.25046e-53																							KRT7	2.21662e-77	-0.283222	0.987	0.995	3.40073e-73
LAGE3	7.32664e-44	-0.254671	0.448	0.643	1.12405e-39		ID1	1.4585e-54	-0.332784	0.82	0.848	2.23764e-50																							PID1	9.74504e-76	0.503992	0.484	0.264	1.49508e-71
CYR61	2.40748e-43	-0.316003	0.107	0.247	3.69356e-39		SAT1	4.71488e-29	-0.347197	0.67	0.684	7.23357e-25																							FN1	1.85637e-75	0.559258	0.552	0.332	2.84804e-71
LAMA3	5.69408e-43	0.300797	0.399	0.274	8.73586e-39		ID3	2.13061e-20	-0.258943	0.856	0.82	3.26878e-16																							ADM	1.01264e-74	0.343031	0.188	0.048	1.55359e-70
ID3	6.02203e-43	-0.289683	0.724	0.856	9.239e-39		CYR61	3.18991e-19	-0.320136	0.158	0.232	4.89397e-15																							ANXA1	3.47712e-74	-0.375868	0.832	0.94	5.3346e-70
PERP	2.33105e-42	0.288878	0.615	0.532	3.57629e-38		AKR1B1	8.8082e-18	-0.303339	0.648	0.613	1.35135e-13																							KRT5	1.61223e-71	-0.459376	0.089	0.366	2.47348e-67
HMGN3	6.15623e-40	0.263811	0.604	0.524	9.44489e-36																														MT2A	2.5153e-71	-0.369558	0.984	0.997	3.85897e-67
MIR205HG	7.96715e-40	0.255717	0.209	0.108	1.22232e-35																														S100A6	1.52525e-70	-0.257056	0.997	0.999	2.34004e-66
FGFBP1	1.33304e-38	0.3249	0.382	0.267	2.04515e-34																														RAB13	3.57781e-70	0.413538	0.816	0.698	5.48908e-66
KRT5	9.93848e-38	0.294942	0.423	0.31	1.52476e-33																														EGFR	7.02646e-70	-0.439429	0.184	0.472	1.078e-65
HIST1H4C	4.00497e-36	-0.334685	0.8	0.863	6.14443e-32																														SLPI	3.36488e-69	-0.406708	0.378	0.691	5.1624e-65
SERPINE2	7.44931e-32	0.304813	0.437	0.348	1.14287e-27																														IGFBP4	5.74842e-69	0.278865	0.195	0.055	8.81923e-65
FOS	1.74314e-31	0.274327	0.586	0.499	2.67432e-27																														BASP1	6.53829e-69	0.319533	0.254	0.088	1.0031e-64
DSP	6.65416e-30	0.275383	0.558	0.487	1.02088e-25																														WFDC2	1.11084e-68	-0.464817	0.389	0.665	1.70425e-64
SYNCRIP	9.89162e-30	0.256346	0.538	0.47	1.51757e-25																														SH2D3A	3.41613e-68	-0.375423	0.031	0.277	5.24103e-64
CXCL1	7.10191e-24	-0.319366	0.397	0.526	1.08958e-19																														AP1M2	4.39636e-68	-0.373833	0.038	0.285	6.7449e-64
TSC22D1	2.04864e-22	0.262043	0.59	0.544	3.14302e-18																														MSRB2	1.60511e-67	0.44856	0.642	0.453	2.46256e-63
																																			DSP	5.02665e-66	-0.433835	0.239	0.536	7.71188e-62
																																			HIF1A	1.11735e-65	0.456809	0.671	0.504	1.71423e-61
																																			FTH1	2.67546e-65	0.415938	1	1	4.10469e-61
																																			EMP3	1.5228e-62	0.415193	0.682	0.503	2.33628e-58
																																			KRT6B	3.22601e-62	-0.417479	0.026	0.252	4.94935e-58
																																			KRT8	2.77266e-61	-0.377399	0.714	0.884	4.25381e-57
																																			CYBA	2.18792e-60	0.302399	0.967	0.937	3.35671e-56
																																			PTGES	2.32631e-60	-0.302379	0.791	0.943	3.56902e-56
																																			RHOF	3.8381e-59	-0.375712	0.196	0.466	5.88842e-55
																																			LAMC2	4.80096e-59	-0.370269	0.044	0.27	7.36564e-55
																																			MAGED2	5.59095e-59	0.329832	0.287	0.119	8.57764e-55
																																			JUP	1.0035e-58	-0.332602	0.026	0.242	1.53957e-54
																																			C19orf33	1.60758e-58	-0.392578	0.25	0.515	2.46635e-54
																																			COMT	2.76164e-58	-0.377321	0.353	0.619	4.23691e-54
																																			CLTB	1.23484e-57	-0.404521	0.374	0.623	1.89449e-53
																																			MDK	7.7567e-57	0.384719	0.354	0.173	1.19003e-52
																																			HMGA1	1.43613e-56	-0.317729	0.799	0.93	2.20331e-52
																																			CXCL2	1.39332e-55	0.455823	0.24	0.093	2.13764e-51
																																			ALPP	1.41221e-55	-0.331006	0.023	0.228	2.16662e-51
																																			PLEK2	1.63334e-55	-0.349809	0.125	0.369	2.50587e-51
																																			CD55	1.85157e-55	-0.389311	0.14	0.389	2.84067e-51
																																			PHLDA2	3.52317e-55	-0.375506	0.527	0.746	5.40525e-51
																																			DUSP23	4.76681e-55	0.435176	0.739	0.627	7.31325e-51
																																			CTSC	1.06657e-54	0.498441	0.787	0.706	1.63633e-50
																																			IKBIP	1.99404e-54	0.359942	0.386	0.206	3.05925e-50
																																			CDH3	4.03645e-54	-0.310854	0.049	0.266	6.19271e-50
																																			RHOD	4.89336e-53	-0.365191	0.314	0.581	7.50739e-49
																																			SELM	1.57572e-52	0.399355	0.41	0.234	2.41747e-48
																																			PTPRN	5.444e-52	0.332917	0.29	0.129	8.35218e-48
																																			UBB	1.16394e-51	0.256813	0.97	0.958	1.78572e-47
																																			PI3	1.18852e-51	-0.388019	0.252	0.512	1.82342e-47
																																			RAB25	1.25552e-51	-0.295265	0.015	0.203	1.92622e-47
																																			PF4	3.85944e-51	0.387852	0.234	0.093	5.92116e-47
																																			CCNA1	5.25359e-51	-0.323531	0.033	0.23	8.06006e-47
																																			MPRIP	2.42302e-50	-0.354135	0.449	0.687	3.7174e-46
																																			ARRDC1	3.96789e-50	-0.3233	0.134	0.373	6.08753e-46
																																			INHBA	4.39695e-49	-0.354829	0.052	0.255	6.7458e-45
																																			ESRP1	4.65389e-49	-0.271005	0.011	0.189	7.13999e-45
																																			COX7A2	8.40496e-48	-0.330026	0.779	0.879	1.28949e-43
																																			MAP7	1.13941e-47	-0.292552	0.052	0.249	1.74808e-43
																																			C9orf169	1.82967e-46	-0.322211	0.082	0.29	2.80708e-42
																																			NNMT	3.68023e-45	0.438616	0.873	0.817	5.6462e-41
																																			C1orf21	6.7121e-45	0.260894	0.187	0.069	1.02977e-40
																																			PKP3	2.75524e-44	-0.297677	0.165	0.392	4.22709e-40
																																			NGFRAP1	3.2807e-44	0.356195	0.627	0.49	5.03325e-40
																																			IER3	4.2578e-44	-0.359997	0.695	0.859	6.53231e-40
																																			TGM2	5.79582e-44	0.385823	0.348	0.193	8.89194e-40
																																			HIPK2	6.95113e-44	0.280781	0.19	0.072	1.06644e-39
																																			TGFB2	1.28508e-43	0.273318	0.202	0.08	1.97157e-39
																																			CDA	1.49065e-43	-0.324538	0.538	0.743	2.28696e-39
																																			DUSP4	1.71713e-42	-0.310586	0.173	0.396	2.63441e-38
																																			PPAP2C	1.96302e-42	-0.303764	0.184	0.406	3.01167e-38
																																			AP2M1	3.16141e-42	0.282766	0.897	0.86	4.85023e-38
																																			CEBPD	4.46462e-42	0.453302	0.521	0.385	6.84962e-38
																																			SERPINB5	2.74977e-41	-0.299226	0.11	0.312	4.2187e-37
																																			MXD4	4.16916e-41	0.352305	0.291	0.149	6.39633e-37
																																			TACSTD2	4.74446e-41	-0.25488	0.026	0.188	7.27895e-37
																																			ARPC5	4.9899e-41	0.309438	0.81	0.742	7.65551e-37
																																			ATP2B1	5.59635e-41	0.36911	0.665	0.542	8.58592e-37
																																			TMEM54	9.36529e-41	-0.293282	0.182	0.399	1.43682e-36
																																			GNG11	1.63887e-40	0.306803	0.255	0.121	2.51436e-36
																																			TGFBI	2.07467e-40	0.381155	0.432	0.275	3.18296e-36
																																			SH3KBP1	6.15273e-40	-0.301256	0.268	0.496	9.43951e-36
																																			LSR	6.50464e-40	-0.261188	0.075	0.261	9.97941e-36
																																			ANPEP	7.10307e-40	-0.303815	0.396	0.619	1.08975e-35
																																			HTRA1	1.93501e-39	0.335354	0.787	0.701	2.96869e-35
																																			CXCL3	1.88927e-38	0.499063	0.357	0.209	2.89852e-34
																																			FOXO1	1.94917e-38	0.289703	0.272	0.135	2.99042e-34
																																			ITGA6	2.14114e-38	-0.253914	0.039	0.201	3.28494e-34
																																			LRRFIP1	2.62027e-38	-0.299507	0.341	0.564	4.02001e-34
																																			RBMS1	1.6671e-37	0.347256	0.332	0.189	2.55766e-33
																																			FERMT1	2.74474e-37	-0.28888	0.184	0.392	4.21099e-33
																																			SOD2	4.369e-37	0.440708	0.642	0.528	6.70292e-33
																																			NEAT1	7.34285e-37	0.393685	0.982	0.967	1.12654e-32
																																			SAT1	9.9492e-37	0.535646	0.733	0.675	1.52641e-32
																																			VARS2	2.73468e-36	-0.257763	0.076	0.247	4.19554e-32
																																			FOSL1	2.82156e-35	-0.314298	0.332	0.542	4.32883e-31
																																			MRPS15	3.20711e-35	-0.250859	0.679	0.828	4.92035e-31
																																			LAGE3	3.4597e-35	0.313157	0.698	0.589	5.30787e-31
																																			CALU	3.95275e-35	0.32335	0.63	0.517	6.06431e-31
																																			PSCA	4.19765e-35	-0.294361	0.081	0.251	6.44003e-31
																																			KRTCAP3	1.75786e-34	-0.256481	0.12	0.304	2.69691e-30
																																			ODC1	6.17158e-34	-0.271434	0.444	0.658	9.46845e-30
																																			ID1	6.46812e-34	0.299968	0.887	0.836	9.92339e-30
																																			SH3BGRL3	9.75833e-34	0.255871	0.868	0.825	1.49712e-29
																																			SNAPC1	9.79797e-34	0.317493	0.435	0.293	1.5032e-29
																																			STARD10	2.30148e-33	-0.264983	0.161	0.348	3.53094e-29
																																			RPL22L1	1.11401e-32	-0.374287	0.614	0.758	1.70912e-28
																																			SPINK6	2.54311e-32	0.71203	0.211	0.101	3.90164e-28
																																			SLC25A39	3.33311e-32	-0.257311	0.518	0.7	5.11365e-28
																																			TPM1	5.80314e-32	0.338351	0.337	0.208	8.90318e-28
																																			TPM4	2.15943e-31	0.275833	0.801	0.738	3.313e-27
																																			TUBA4A	1.62126e-30	-0.25301	0.565	0.744	2.48733e-26
																																			SCD	1.82949e-29	-0.286137	0.426	0.609	2.8068e-25
																																			TLN1	4.43248e-29	0.295705	0.39	0.264	6.80032e-25
																																			UCHL3	3.25423e-28	-0.252556	0.29	0.478	4.99264e-24
																																			RAMP1	4.37598e-28	0.322254	0.5	0.383	6.71363e-24
																																			PMEPA1	4.55847e-27	-0.270713	0.579	0.732	6.9936e-23
																																			SQSTM1	1.2132e-25	0.274792	0.747	0.688	1.8613e-21
																																			TWIST1	9.36508e-25	0.291297	0.271	0.163	1.43679e-20
																																			VGF	1.24178e-23	0.396101	0.351	0.246	1.90514e-19
																																			PEG10	1.46988e-23	0.315669	0.765	0.715	2.25508e-19
																																			TXNRD1	3.37641e-23	0.32082	0.451	0.347	5.18008e-19
																																			EEF1A2	5.5703e-23	0.284236	0.616	0.497	8.54595e-19
																																			GAMT	5.1636e-20	0.256319	0.367	0.266	7.92199e-16
																																			PLOD2	6.94065e-17	0.252953	0.373	0.285	1.06484e-12
																																			IGFBP6	3.35516e-16	0.252919	0.638	0.57	5.14748e-12
																																			FERMT2	1.41618e-15	0.252801	0.392	0.312	2.1727e-11

## Sheet: INT_SUM149&SUM149PR clusters
CLUSTER 0															CLUSTER 1															CLUSTER2															CLUSTER 3
Gene	SUM149_p_val	SUM149_avg_logFC	SUM149_pct.1	SUM149_pct.2	SUM149_p_val_adj	SUM149PR_p_val	SUM149PR_avg_logFC	SUM149PR_pct.1	SUM149PR_pct.2	SUM149PR_p_val_adj	max_pval	minimump_p_val	p_val_adj		Gene	SUM149_p_val	SUM149_avg_logFC	SUM149_pct.1	SUM149_pct.2	SUM149_p_val_adj	SUM149PR_p_val	SUM149PR_avg_logFC	SUM149PR_pct.1	SUM149PR_pct.2	SUM149PR_p_val_adj	max_pval	minimump_p_val	p_val_adj		Gene	SUM149_p_val	SUM149_avg_logFC	SUM149_pct.1	SUM149_pct.2	SUM149_p_val_adj	SUM149PR_p_val	SUM149PR_avg_logFC	SUM149PR_pct.1	SUM149PR_pct.2	SUM149PR_p_val_adj	max_pval	minimump_p_val	p_val_adj		Gene	SUM149_p_val	SUM149_avg_logFC	SUM149_pct.1	SUM149_pct.2
UBE2C	2.47381e-32	0.886951	0.975	0.551	3.91011e-28	2.50806e-252	0.557167	0.9	0.482	3.96425e-248	2.47381e-32	5.01613e-252	1.05339e-250		TOP2A	4.3e-32	-1.12415	0.319	0.933	6.8e-28	2.79e-210	-0.785097	0.219	0.596	4.42e-206	4.3e-32	5.59e-210	2.4e-208		EEF1A1	0.490524	0.303905	1	1	1	2.13447e-243	-0.426276	0.999	0.997	3.37375e-239	0.490524	4.26895e-243	8.53789e-242		MT2A	0.003732	-0.914643	1	0.995
TOP2A	2.40418e-34	0.784445	0.988	0.449	3.80005e-30	1.45903e-211	0.439658	0.874	0.433	2.30614e-207	2.40418e-34	2.91806e-211	3.06396e-210		HIST1H4C	7.52e-21	-1.60319	0.944	0.987	1.19e-16	9.74e-188	-0.998361	0.765	0.869	1.54e-183	7.52e-21	1.95e-187	2.92e-186		RPL22L1	0.000549617	0.699989	1	0.957	1	1.17025e-137	0.564807	0.832	0.721	1.8497e-133	0.000549617	2.3405e-137	2.3405e-136		SEC61G	0.0492103	-0.365069	1	1
PLK1	1.85327e-22	0.509623	0.822	0.331	2.92928e-18	2.74514e-169	0.387069	0.754	0.361	4.33897e-165	1.85327e-22	5.49028e-169	3.8432e-168		UBE2C	1.56e-26	-1.0879	0.431	0.936	2.46e-22	1.02e-187	-0.790617	0.306	0.63	1.61e-183	1.56e-26	2.04e-187	2.92e-186		KRT19	0.0483125	-0.707777	0.889	0.973	1	2.06468e-131	-0.839875	0.636	0.807	3.26343e-127	0.0483125	4.12936e-131	2.7529e-130		EEF1A1	0.0181284	-0.404105	1	1
CDK1	4.69023e-22	0.4066	0.875	0.386	7.41337e-18	2.44416e-142	0.301296	0.641	0.283	3.86323e-138	4.69023e-22	4.88831e-142	2.56636e-141		CENPF	1.16e-22	-0.886524	0.514	0.915	1.83e-18	2.85e-153	-0.6489	0.365	0.664	4.5e-149	1.16e-22	5.7e-153	6.13e-152		TIMP1	0.737653	0.776917	1	1	1	7.98897e-113	0.394437	0.992	0.991	1.26274e-108	0.737653	1.59779e-112	7.98897e-112		VIM	0.0816493	-0.342744	0.111	0.45
AURKB	3.8655e-23	0.380998	0.941	0.48	6.10981e-19	1.16586e-139	0.304033	0.772	0.379	1.84276e-135	3.8655e-23	2.33172e-139	9.79323e-139		KRT19	0.0390852	0.369757	0.986	0.968	1	6.56e-148	0.659073	0.921	0.739	1.04e-143	0.0390852	1.31e-147	1.13e-146		VIM	0.155554	0.622592	0.556	0.441	1	7.81596e-87	0.3419	0.723	0.497	1.23539e-82	0.155554	1.56319e-86	6.25277e-86		AREG	0.0407539	-0.438766	0.556	0.781
NUSAP1	3.65416e-30	0.522747	0.95	0.417	5.77576e-26	6.52924e-133	0.302509	0.778	0.394	1.03201e-128	3.65416e-30	1.30585e-132	4.57047e-132		TUBB	8.18e-23	-0.60477	0.972	0.997	1.29e-18	1.32e-141	-0.366661	0.949	0.974	2.09e-137	8.18e-23	2.65e-141	1.9e-140		HMGA1	0.105217	-0.254137	1	0.995	1	3.31026e-83	0.309379	0.951	0.906	5.2322e-79	0.105217	6.62053e-83	2.20684e-82		KRT5	0.00162825	0.551964	1	0.842
MKI67	7.01886e-25	0.461309	0.956	0.488	1.1094e-20	1.399e-127	0.31639	0.802	0.433	2.21126e-123	7.01886e-25	2.79799e-127	8.39398e-127		S100A14	3.4e-06	0.44632	1	0.965	0.0537488	3.79e-133	0.476936	0.9	0.717	5.99e-129	3.4e-06	7.57e-133	4.65e-132		AKAP12	0.0946138	0.386361	0.556	0.34	1	5.84935e-69	0.492126	0.446	0.284	9.24548e-65	0.0946138	1.16987e-68	3.34249e-68		HMGA1	0.000872293	-0.671562	0.889	0.998
AURKA	2.31815e-25	0.566329	0.922	0.449	3.66407e-21	2.74971e-127	0.316215	0.84	0.468	4.3462e-123	2.31815e-25	5.49943e-127	1.4436e-126		NUSAP1	1.29e-26	-0.666849	0.306	0.893	2.05e-22	2.04e-127	-0.509333	0.227	0.532	3.23e-123	1.29e-26	4.08e-127	2.19e-126		STOML2	0.00565545	0.367804	1	0.959	1	1.71745e-50	0.267283	0.824	0.794	2.71459e-46	0.00565545	3.43489e-50	8.58723e-50		MT1E	0.0894456	-0.386583	0.556	0.968
TUBB	2.29339e-24	0.47169	1	0.976	3.62493e-20	1.9659e-123	0.267721	1	0.961	3.1073e-119	2.29339e-24	3.9318e-123	9.17421e-123		AURKB	5.64e-21	-0.502456	0.361	0.896	8.92e-17	1.24e-115	-0.452844	0.222	0.517	1.96e-111	5.64e-21	2.48e-115	1.18e-114		TOP2A	0.0101451	-0.627052	0.667	0.838	1	2.40233e-49	-0.365052	0.38	0.558	3.79712e-45	0.0101451	4.80465e-49	1.0677e-48		SLPI	0.349141	0.367584	0.889	0.902
TPX2	1.11446e-23	0.466859	0.95	0.48	1.76151e-19	1.9859e-121	0.321534	0.896	0.543	3.13892e-117	1.11446e-23	3.9718e-121	8.34079e-121		CDK1	5.12e-24	-0.555385	0.208	0.837	8.1e-20	2.3e-114	-0.434984	0.131	0.411	3.63e-110	5.12e-24	4.6e-114	1.98e-113		CCDC85B	0.0411139	0.665675	1	0.973	1	3.46302e-48	0.261494	0.917	0.868	5.47365e-44	0.0411139	6.92605e-48	1.38521e-47		ATP6V1F	0.0400931	0.399007	1	0.989
CKS2	9.40469e-23	0.559931	0.997	0.921	1.48651e-18	2.19321e-119	0.309165	0.976	0.767	3.46658e-115	9.40469e-23	4.38642e-119	8.37407e-119		MKI67	1.66e-22	-0.656169	0.375	0.909	2.63e-18	1.73e-107	-0.457696	0.286	0.562	2.74e-103	1.66e-22	3.46e-107	1.35e-106		ADIRF	0.00446641	-0.637121	0.667	0.932	1	1.52511e-47	-0.282238	0.097	0.26	2.41059e-43	0.00446641	3.05022e-47	5.54585e-47		SPINK6	0.325077	-0.403182	0.333	0.486
CENPF	5.78221e-28	0.682393	0.95	0.598	9.13936e-24	3.76533e-111	0.315034	0.875	0.536	5.95147e-107	5.78221e-28	7.53065e-111	1.31786e-110		HMGB2	1.71e-25	-1.01446	0.722	0.979	2.71e-21	5.38e-104	-0.412615	0.47	0.722	8.51e-100	1.71e-25	1.08e-103	3.86e-103		DDIT4	0.00816806	-0.441337	0.778	0.929	1	1.85363e-45	-0.285252	0.607	0.78	2.92985e-41	0.00816806	3.70726e-45	6.17877e-45		RP11-792A8.4	0.0197837	-0.429154	0.889	0.975
TUBA1C	1.96104e-10	0.330632	0.984	0.882	3.09962e-06	4.64191e-106	0.285824	0.983	0.849	7.337e-102	1.96104e-10	9.28382e-106	1.49969e-105		AURKA	3.52e-19	-0.618642	0.347	0.872	5.57e-15	3.27e-95	-0.45174	0.341	0.593	5.16e-91	3.52e-19	6.54e-95	2.16e-94		S100A14	0.0477234	-0.505118	0.889	0.973	1	4.44294e-43	-0.314753	0.673	0.771	7.02251e-39	0.0477234	8.88588e-43	1.36706e-42		IER3	0.00312907	-0.636005	0.889	0.968
HIST1H4C	1.8878e-20	0.912159	0.991	0.953	2.98386e-16	1.57104e-102	0.391592	0.959	0.82	2.48318e-98	1.8878e-20	3.14207e-102	4.71311e-102		TPX2	1.27e-16	-0.472385	0.417	0.893	2.01e-12	1.24e-88	-0.401837	0.425	0.661	1.97e-84	1.27e-16	2.49e-88	7.65e-88		UBE2C	0.00665056	-0.767892	0.667	0.858	1	3.70422e-41	-0.377911	0.448	0.597	5.85488e-37	0.00665056	7.40843e-41	1.05835e-40		LCN2	0.705903	0.391514	0.667	0.849
UBE2S	8.34083e-26	0.71401	0.997	0.953	1.31835e-21	5.16808e-101	0.280427	0.985	0.871	8.16867e-97	8.34083e-26	1.03362e-100	1.44706e-100		CKS2	1.28e-19	-0.687397	0.917	0.987	2.02e-15	2.07e-76	-0.329957	0.726	0.83	3.26e-72	1.28e-19	4.13e-76	1.18e-75		KRT6A	0.0105381	-0.660653	0.667	0.934	1	1.17096e-35	-0.316498	0.504	0.664	1.85083e-31	0.0105381	2.34193e-35	3.12257e-35		MT1X	0.201953	-0.286635	0.778	0.973
KPNA2	8.65927e-16	0.396259	0.906	0.614	1.36868e-11	7.35922e-95	0.293451	0.788	0.469	1.1632e-90	8.65927e-16	1.47184e-94	1.9318e-94		TUBA1C	1.09e-09	-0.427977	0.875	0.971	1.72e-05	3.28e-76	-0.313041	0.83	0.888	5.19e-72	1.09e-09	6.56e-76	1.76e-75		CYP1B1	0.00147652	0.367676	1	0.527	1	2.42331e-34	-0.312972	0.161	0.312	3.83029e-30	0.00147652	4.84663e-34	6.05829e-34		KRT6B	0.332483	0.289083	0.889	0.751
FTH1	3.26031e-07	-0.44821	1	1	0.00515325	2.05533e-43	-0.253167	1	1	3.24865e-39	3.26031e-07	4.11065e-43	5.07787e-43		PLK1	6.96e-14	-0.489606	0.292	0.757	1.1e-09	2.16e-75	-0.400145	0.258	0.486	3.42e-71	6.96e-14	4.32e-75	1.09e-74		FOS	0.0296375	-0.465149	0.667	0.911	1	5.64205e-34	-0.255668	0.378	0.55	8.91783e-30	0.0296375	1.12841e-33	1.32754e-33		KRT19	0.0411134	0.725711	1	0.97
NEAT1	1.06317e-07	-0.552309	0.988	0.984	0.00168045	1.80975e-24	-0.305763	0.989	0.964	2.86049e-20	1.06317e-07	3.6195e-24	4.22274e-24		H2AFX	1.75e-20	-0.549448	0.653	0.931	2.77e-16	5.93e-74	-0.346468	0.244	0.476	9.37e-70	1.75e-20	1.19e-73	2.83e-73		AURKA	0.00105493	-0.649905	0.222	0.799	1	2.32054e-32	-0.253519	0.418	0.575	3.66785e-28	0.00105493	4.64109e-32	5.15677e-32		DCBLD2	0.0523671	-0.343171	0.778	0.874
SAT1	1.28139e-07	-0.522182	0.988	0.976	0.00202537	2.19035e-19	-0.340524	0.731	0.668	3.46207e-15	1.28139e-07	4.3807e-19	4.84183e-19		ASPM	5.56e-16	-0.433786	0.25	0.776	8.78e-12	6.74e-74	-0.376652	0.337	0.567	1.07e-69	5.56e-16	1.35e-73	3.05e-73		KPNA2	0.0222608	-0.42778	0.556	0.829	1	1.53131e-30	-0.269396	0.409	0.565	2.4204e-26	0.0222608	3.06263e-30	3.22382e-30		EGFR	0.0736213	-0.275405	0.778	0.87
CYP1B1	0.000285269	-0.423356	0.509	0.606	1	0.137852	-0.269912	0.309	0.277	1	0.137852	0.000570456	0.000598979		KPNA2	1.39e-14	-0.498898	0.556	0.875	2.2e-10	1.65e-69	-0.414098	0.379	0.572	2.61e-65	1.39e-14	3.3e-69	7.1e-69		LCN2	0.0461635	-0.527934	0.444	0.854	1	1.27737e-27	-0.268768	0.224	0.37	2.01901e-23	0.0461635	2.55474e-27	2.55474e-27		KRT6A	0.00631361	0.810556	1	0.927
															RRM2	4.96e-26	-0.908615	0.514	0.952	7.84e-22	7.36e-69	-0.335125	0.342	0.568	1.16e-64	4.96e-26	1.47e-68	3.02e-68
															FAM83D	5.26e-14	-0.316559	0.181	0.683	8.31e-10	1.07e-65	-0.268461	0.067	0.249	1.69e-61	5.26e-14	2.13e-65	4.17e-65
															VIM	0.00331754	-0.375126	0.306	0.469	1	5.36e-65	-0.625938	0.394	0.574	8.47e-61	0.00331754	1.07e-64	2e-64
															HMMR	2.01e-15	-0.354784	0.153	0.699	3.17e-11	1.3e-59	-0.297394	0.268	0.488	2.06e-55	2.01e-15	2.61e-59	4.67e-59
															CCDC85B	4.27e-07	-0.306077	0.917	0.984	0.00675432	1.55e-59	-0.303957	0.789	0.898	2.46e-55	4.27e-07	3.11e-59	5.35e-59
															UBE2S	9.7e-17	-0.715088	0.944	0.992	1.53e-12	1.7e-59	-0.277887	0.844	0.907	2.69e-55	9.7e-17	3.4e-59	5.62e-59
															CKAP2	7.12e-15	-0.405075	0.514	0.867	1.13e-10	1.75e-58	-0.270959	0.166	0.368	2.77e-54	7.12e-15	3.51e-58	5.59e-58
															CDCA3	3.08e-19	-0.466093	0.264	0.845	4.86e-15	1.27e-57	-0.275354	0.179	0.381	2.01e-53	3.08e-19	2.54e-57	3.9e-57
															S100P	0.00585998	0.366319	1	0.973	1	4.95e-57	0.368188	0.834	0.713	7.83e-53	0.00585998	9.91e-57	1.47e-56
															HSPA1A	0.108289	0.260886	0.5	0.664	1	8.33e-57	-0.311101	0.255	0.458	1.32e-52	0.108289	1.67e-56	2.39e-56
															GTSE1	2.43e-16	-0.318021	0.139	0.691	3.83e-12	6.64e-56	-0.258899	0.136	0.327	1.05e-51	2.43e-16	1.33e-55	1.84e-55
															S100A2	0.0263757	0.268514	1	0.995	1	3.51e-54	0.264274	0.995	0.988	5.55e-50	0.0263757	7.02e-54	9.43e-54
															CALM2	5.53e-13	-0.480387	0.986	0.995	8.73e-09	6.13e-53	-0.25383	0.829	0.876	9.69e-49	5.53e-13	1.23e-52	1.6e-52
															FAM111A	6.9e-12	-0.291741	0.333	0.768	1.09e-07	4.48e-50	-0.254551	0.126	0.296	7.07e-46	6.9e-12	8.95e-50	1.13e-49
															UBE2T	2.82e-13	-0.439941	0.556	0.885	4.46e-09	7.93e-49	-0.262017	0.434	0.617	1.25e-44	2.82e-13	1.59e-48	1.95e-48
															PRC1	2.37e-23	-0.55661	0.528	0.933	3.74e-19	7.42e-48	-0.258969	0.364	0.555	1.17e-43	2.37e-23	1.48e-47	1.77e-47
															KRT6B	0.0153496	0.441655	0.806	0.744	1	2.92e-46	0.331944	0.337	0.2	4.62e-42	0.0153496	5.85e-46	6.8e-46
															C11orf83	6.16e-08	-0.319891	0.917	0.963	0.000973454	9.38e-45	-0.25414	0.62	0.751	1.48e-40	6.16e-08	1.88e-44	2.12e-44
															DNAJA1	0.0420604	0.280735	0.708	0.824	1	2.66e-42	-0.253824	0.555	0.7	4.21e-38	0.0420604	5.32e-42	5.87e-42
															LAMA3	0.00324468	0.418816	0.833	0.816	1	1.94e-37	0.301112	0.401	0.277	3.07e-33	0.00324468	3.88e-37	4.17e-37
															FXYD3	0.00335994	0.2938	0.944	0.88	1	3.77e-35	0.316789	0.407	0.288	5.96e-31	0.00335994	7.54e-35	7.9e-35
															KRT6A	0.299712	0.357026	0.903	0.933	1	9.86e-32	0.297079	0.717	0.613	1.56e-27	0.299712	1.97e-31	2.02e-31
															GPRC5A	0.0373123	0.295256	0.806	0.835	1	1.08e-29	0.26842	0.625	0.523	1.71e-25	0.0373123	2.16e-29	2.16e-29
															cell cycle cluster - down genes
[truncated: 51 more columns]

## Sheet: INT_FCIBC02&FCIBC02PR_clusters
CLUSTER 0															CLUSTER 1															CLUSTER 2															CLUSTER 3
Gene	FCIBC02_p_val	FCIBC02_avg_logFC	FCIBC02_pct.1	FCIBC02_pct.2	FCIBC02_p_val_adj	FCIBC02PR_p_val	FCIBC02PR_avg_logFC	FCIBC02PR_pct.1	FCIBC02PR_pct.2	FCIBC02PR_p_val_adj	max_pval	minimump_p_val	p_val_adj		Gene	FCIBC02_p_val	FCIBC02_avg_logFC	FCIBC02_pct.1	FCIBC02_pct.2	FCIBC02_p_val_adj	FCIBC02PR_p_val	FCIBC02PR_avg_logFC	FCIBC02PR_pct.1	FCIBC02PR_pct.2	FCIBC02PR_p_val_adj	max_pval	minimump_p_val	p_val_adj		Gene	FCIBC02_p_val	FCIBC02_avg_logFC	FCIBC02_pct.1	FCIBC02_pct.2	FCIBC02_p_val_adj	FCIBC02PR_p_val	FCIBC02PR_avg_logFC	FCIBC02PR_pct.1	FCIBC02PR_pct.2	FCIBC02PR_p_val_adj	max_pval	minimump_p_val	p_val_adj		Gene	FCIBC02_p_val	FCIBC02_avg_logFC	FCIBC02_pct.1	FCIBC02_pct.2
HIST1H4C	9.93119e-94	0.953386	0.987	0.851	1.57141e-89	1.42512e-277	1.11185	0.962	0.703	2.25497e-273	9.93119e-94	2.85024e-277	1.31111e-275		H2AFZ	6.45252e-97	-0.7581	0.996	0.998	1.02098e-92	6.26256e-295	-0.692634	0.957	0.985	9.90925e-291	6.45252e-97	1.25251e-294	1.17736e-292		HSP90AA1	6.44995e-72	-0.485013	1	0.999	1.02058e-67	0	-0.925189	1	0.996	0	6.44995e-72	0	0		PRDX1	2.43202e-36	0.335629	1	1
ATAD2	4.51426e-109	0.607665	0.96	0.6	7.14291e-105	1.03359e-249	0.668921	0.905	0.517	1.63545e-245	4.51426e-109	2.06718e-249	4.75451e-248		UBE2S	2.51374e-81	-1.16116	0.89	0.982	3.97749e-77	8.4185e-280	-1.16741	0.638	0.93	1.33206e-275	2.51374e-81	1.6837e-279	7.91339e-278		HSP90AB1	8.6468e-62	-0.531645	0.995	0.993	1.36818e-57	0	-0.908757	0.978	0.985	0	8.6468e-62	0	0		UBE2C	3.70677e-53	-1.12636	0.53	0.806
FEN1	1.90608e-119	0.588126	0.916	0.533	3.01598e-115	7.71365e-216	0.49162	0.651	0.223	1.22053e-211	1.90608e-119	1.54273e-215	2.36552e-214		CENPF	1.38958e-78	-1.16933	0.174	0.783	2.19873e-74	1.48613e-264	-1.20504	0.13	0.717	2.35151e-260	1.38958e-78	2.97227e-264	9.31311e-263		RPL12	2.19914e-84	0.29312	1	1	3.47971e-80	1.56109e-307	0.433666	1	1	2.47011e-303	2.19914e-84	3.12218e-307	1.89412e-305		POMP	8.00503e-55	0.315139	1	0.996
FAM111B	2.95645e-52	0.277084	0.472	0.164	4.67799e-48	1.82284e-213	0.401334	0.439	0.079	2.88428e-209	2.95645e-52	3.64568e-213	4.19253e-212		HMGB1	7.87216e-50	-0.455475	1	0.998	1.24561e-45	3.19446e-262	-0.692002	0.99	0.995	5.05459e-258	7.87216e-50	6.38891e-262	1.50139e-260		NPM1	6.36312e-81	-0.467737	1	0.999	1.00684e-76	1.16715e-291	-0.679161	0.999	0.993	1.84678e-287	6.36312e-81	2.33429e-291	1.0621e-289		PTTG1	9.51221e-48	0.590904	0.93	0.662
CLSPN	9.96424e-101	0.503094	0.835	0.381	1.57664e-96	2.82916e-202	0.463388	0.585	0.184	4.47658e-198	9.96424e-101	5.65832e-202	5.20566e-201		KIAA0101	2.44684e-74	-1.02391	0.374	0.843	3.87163e-70	2.25515e-256	-0.937262	0.255	0.794	3.56832e-252	2.44684e-74	4.51029e-256	8.47935e-255		ANXA2	1.01941e-55	-0.318194	1	1	1.61302e-51	4.6972e-290	-0.623595	0.999	0.995	7.43238e-286	1.01941e-55	9.3944e-290	3.41956e-288		PTMS	2.24763e-41	0.34915	1	0.985
KIAA0101	9.25819e-79	0.610001	0.965	0.704	1.46492e-74	7.54371e-201	0.635742	0.937	0.605	1.19364e-196	9.25819e-79	1.50874e-200	1.1567e-199		CDC20	7.6184e-92	-1.66472	0.374	0.893	1.20546e-87	3.58055e-240	-1.26658	0.126	0.686	5.6655e-236	7.6184e-92	7.1611e-240	1.12191e-238		PHGDH	3.69128e-84	-0.635401	1	0.997	5.84071e-80	7.12891e-288	-0.916465	0.987	0.976	1.12801e-283	3.69128e-84	1.42578e-287	4.32487e-286		LDHA	1.03224e-61	0.525013	1	0.993
RNASEH2A	4.0658e-73	0.452354	0.995	0.883	6.43331e-69	2.70054e-199	0.558252	0.928	0.622	4.27307e-195	4.0658e-73	5.40108e-199	3.54928e-198		HMGB2	1.44381e-79	-1.23864	0.406	0.86	2.28453e-75	3.48152e-210	-0.874342	0.173	0.694	5.50882e-206	1.44381e-79	6.96305e-210	9.35038e-209		RPL41	4.9951e-89	0.279687	1	1	7.90375e-85	3.42687e-282	0.369436	1	1	5.42234e-278	4.9951e-89	6.85374e-282	1.78197e-280		EBNA1BP2	2.77987e-71	0.480629	1	0.995
RRM2	1.22837e-62	0.448971	0.814	0.463	1.94365e-58	1.80716e-182	0.541639	0.705	0.312	2.85947e-178	1.22837e-62	3.61432e-182	2.07823e-181		MYBL2	4.33364e-67	-0.669247	0.278	0.801	6.85712e-63	4.11448e-196	-0.603193	0.084	0.608	6.51034e-192	4.33364e-67	8.22896e-196	9.66903e-195		RPS12	7.83408e-99	0.297687	1	0.999	1.23959e-94	9.9708e-269	0.359853	1	1	1.57768e-264	7.83408e-99	1.99416e-268	4.53672e-267		HSP90AB1	3.18974e-20	0.252805	0.997	0.993
PCNA	4.2261e-69	0.449607	0.867	0.559	6.68695e-65	1.02041e-178	0.475459	0.708	0.307	1.6146e-174	4.2261e-69	2.04082e-178	1.04309e-177		PTTG1	3.1843e-59	-0.999907	0.288	0.77	5.03852e-55	4.74776e-190	-0.924643	0.135	0.63	7.51237e-186	3.1843e-59	9.49551e-190	9.91754e-189		MT-CO2	8.66048e-129	0.475767	1	0.997	1.37035e-124	8.92791e-267	0.382843	1	0.999	1.41266e-262	8.66048e-129	1.78558e-266	3.61084e-265		MALAT1	1.97385e-75	-0.838849	1	0.999
DUT	1.39746e-52	0.391764	0.98	0.878	2.2112e-48	1.15811e-168	0.509231	0.969	0.786	1.83248e-164	1.39746e-52	2.31622e-168	1.06546e-167		CKS1B	1.3365e-72	-0.752233	0.9	0.981	2.11475e-68	1.27145e-188	-0.685442	0.569	0.887	2.01181e-184	1.3365e-72	2.5429e-188	2.39032e-187		CCT3	2.72345e-57	-0.401251	0.998	0.997	4.30932e-53	1.09708e-258	-0.693071	0.987	0.979	1.73591e-254	2.72345e-57	2.19416e-258	3.99337e-257		HIST1H4C	6.53767e-41	-1.41644	0.861	0.894
MCM10	6.98027e-58	0.304708	0.543	0.216	1.10449e-53	8.01644e-161	0.342592	0.421	0.105	1.26844e-156	6.98027e-58	1.60329e-160	6.70466e-160		MKI67	3.88832e-77	-0.972312	0.093	0.72	6.15249e-73	2.38801e-188	-0.690553	0.037	0.538	3.77855e-184	3.88832e-77	4.77603e-188	4.08133e-187		SSB	7.32345e-71	-0.458013	1	0.998	1.15879e-66	5.5885e-251	-0.734105	0.976	0.971	8.84269e-247	7.32345e-71	1.1177e-250	1.84929e-249		NMU	9.64794e-68	0.450333	0.7	0.245
HELLS	6.37627e-58	0.359369	0.773	0.442	1.00892e-53	4.27211e-158	0.464179	0.694	0.326	6.75976e-154	6.37627e-58	8.54422e-158	3.27528e-157		TYMS	6.54108e-52	-0.507958	0.192	0.702	1.035e-47	4.74083e-188	-0.65037	0.172	0.681	7.50142e-184	6.54108e-52	9.48167e-188	7.4273e-187		PRDX1	8.51775e-123	-0.676268	1	1	1.34776e-118	2.67533e-250	-0.722428	0.992	0.98	4.23318e-246	8.51775e-123	5.35066e-250	8.11517e-249		HMGB1	1.92186e-41	0.291764	1	0.998
ASF1B	1.73303e-104	0.586865	0.936	0.547	2.74218e-100	1.27078e-149	0.415415	0.627	0.268	2.01075e-145	1.73303e-104	2.54156e-149	8.9932e-149		HIST1H4C	5.76287e-44	-1.42918	0.786	0.906	9.11858e-40	6.10861e-184	-1.3259	0.529	0.824	9.66566e-180	5.76287e-44	1.22172e-183	8.83399e-183		KRT19	3.9247e-36	-0.409942	1	0.997	6.21006e-32	5.54359e-250	-0.697102	0.999	0.993	8.77162e-246	3.9247e-36	1.10872e-249	1.55221e-248		HSP90AA1	1.73204e-28	0.300766	1	0.999
MCM7	1.09172e-45	0.314751	0.856	0.628	1.72744e-41	8.80964e-148	0.454213	0.839	0.531	1.39395e-143	1.09172e-45	1.76193e-147	5.78919e-147		TOP2A	1.04734e-35	-0.480353	0.064	0.471	1.6572e-31	4.00096e-179	-0.825793	0.032	0.51	6.33072e-175	1.04734e-35	8.00192e-179	5.37272e-178		MALAT1	6.47496e-27	-0.406841	1	0.999	1.02453e-22	1.57971e-238	-1.15755	0.997	0.995	2.49958e-234	6.47496e-27	3.15943e-238	4.10726e-237		ATAD2	8.9463e-57	-0.671665	0.317	0.765
E2F1	8.89761e-83	0.446682	0.841	0.423	1.40787e-78	5.57262e-141	0.362147	0.547	0.204	8.81756e-137	8.89761e-83	1.11452e-140	3.41787e-140		UBE2C	2.57649e-59	-1.14032	0.413	0.824	4.07678e-55	2.94922e-177	-1.0568	0.315	0.727	4.66654e-173	2.57649e-59	5.89843e-177	3.69635e-176		RPS28	1.68707e-108	0.296606	1	1	2.66946e-104	1.17557e-236	0.273003	1	1	1.8601e-232	1.68707e-108	2.35113e-236	2.85271e-235		UBB	7.74942e-59	0.410377	1	0.999
MCM3	1.87621e-42	0.269208	0.627	0.338	2.96873e-38	9.66896e-137	0.410863	0.598	0.255	1.52992e-132	1.87621e-42	1.93379e-136	5.55965e-136		TPX2	2.50428e-43	-0.552765	0.1	0.564	3.96252e-39	1.52545e-168	-0.659515	0.068	0.538	2.41372e-164	2.50428e-43	3.0509e-168	1.7924e-167		FTL	1.26348e-70	0.346982	1	0.999	1.99921e-66	4.93145e-221	0.429339	1	0.999	7.80303e-217	1.26348e-70	9.8629e-221	1.1219e-219		TOP2A	2.31732e-31	-0.461671	0.101	0.466
MCM5	5.52887e-48	0.291315	0.594	0.293	8.74833e-44	1.16561e-126	0.380923	0.627	0.291	1.84435e-122	5.52887e-48	2.33122e-126	6.30802e-126		CDKN3	1.73225e-57	-0.830343	0.352	0.811	2.74093e-53	3.17783e-168	-0.661871	0.077	0.549	5.02828e-164	1.73225e-57	6.35565e-168	3.5143e-167		MYL12B	2.58507e-77	-0.408626	1	0.999	4.09036e-73	4.04865e-216	-0.605959	0.986	0.968	6.40619e-212	2.58507e-77	8.09731e-216	8.66888e-215		HSPD1	7.17317e-33	0.313932	1	0.992
GINS2	1.21981e-56	0.351971	0.704	0.387	1.9301e-52	3.82355e-125	0.309937	0.443	0.146	6.05001e-121	1.21981e-56	7.6471e-125	1.95426e-124		BIRC5	1.60932e-46	-0.509509	0.103	0.589	2.54643e-42	4.21693e-167	-0.600013	0.038	0.501	6.67245e-163	1.60932e-46	8.43387e-167	4.40435e-166		MYL12A	3.1333e-71	-0.425054	0.998	0.999	4.95783e-67	1.33424e-203	-0.640887	0.978	0.963	2.11116e-199	3.1333e-71	2.66847e-203	2.69812e-202		HMGN2	1.92979e-38	0.373005	0.997	0.987
DSCC1	8.00053e-51	0.273627	0.576	0.266	1.26592e-46	2.98798e-124	0.325758	0.454	0.156	4.72788e-120	8.00053e-51	5.97595e-124	1.44681e-123		SMC4	2.56961e-67	-0.756592	0.32	0.805	4.06589e-63	2.03492e-160	-0.585116	0.152	0.62	3.21986e-156	2.56961e-67	4.06985e-160	2.0135e-159		HSPD1	7.15206e-71	-0.466075	0.989	0.994	1.13167e-66	4.46023e-203	-0.682534	0.929	0.947	7.05742e-199	7.15206e-71	8.92046e-203	8.54486e-202		SLIRP	8.58146e-29	0.267279	0.993	0.978
GGCT	1.09971e-53	0.315329	0.987	0.957	1.74007e-49	1.68603e-123	0.374564	0.959	0.816	2.6678e-119	1.09971e-53	3.37205e-123	7.75572e-123		RRM2	1.23519e-56	-0.61506	0.096	0.637	1.95445e-52	2.5313e-157	-0.531232	0.044	0.496	4.00527e-153	1.23519e-56	5.06259e-157	2.37942e-156		UBC	1.44177e-26	-0.404266	0.837	0.861	2.28131e-22	3.87385e-200	-0.762288	0.847	0.92	6.12959e-196	1.44177e-26	7.7477e-200	7.0504e-199		LGALS1	2.04082e-10	0.340555	0.986	0.974
MCM4	3.68944e-51	0.310304	0.782	0.491	5.8378e-47	7.63389e-122	0.425266	0.739	0.423	1.20791e-117	3.68944e-51	1.52678e-121	3.34437e-121		NUSAP1	5.68848e-49	-0.621627	0.11	0.6	9.00089e-45	2.24887e-156	-0.668529	0.07	0.518	3.55839e-152	5.68848e-49	4.49774e-156	1.93439e-155		ENO1	2.86246e-109	-0.6777	1	0.997	4.52927e-105	1.06166e-191	-0.610902	0.967	0.96	1.67987e-187	2.86246e-109	2.12333e-191	1.84022e-190		PSMB6	2.81516e-55	0.422087	0.997	0.98
CDT1	8.5478e-56	0.354725	0.697	0.371	1.35252e-51	1.83801e-120	0.35862	0.571	0.255	2.90829e-116	8.5478e-56	3.67603e-120	7.68624e-120		KRT19	2.06831e-39	0.412462	0.993	0.998	3.27268e-35	2.26365e-156	0.369905	0.997	0.993	3.58177e-152	2.06831e-39	4.5273e-156	1.93439e-155		CALR	3.53517e-25	-0.283155	0.984	0.974	5.5937e-21	4.366e-172	-0.594079	0.939	0.954	6.90832e-168	3.53517e-25	8.732e-172	7.22375e-171		PRMT1	5.58569e-21	0.262114	0.976	0.951
TYMS	3.46535e-41	0.331969	0.815	0.559	5.48322e-37	2.53646e-112	0.414879	0.81	0.504	4.01343e-108	3.46535e-41	5.07291e-112	1.01458e-111		CKS2	3.79571e-46	-0.856165	0.858	0.962	6.00595e-42	7.54858e-156	-0.874979	0.618	0.87	1.19441e-151	3.79571e-46	1.50972e-155	6.17014e-155		EPCAM	5.15715e-69	-0.472951	0.993	0.993	8.16015e-65	7.49407e-172	-0.613921	0.892	0.924	1.18579e-167	5.15715e-69	1.49881e-171	1.18602e-170		PSMB3	1.33429e-23	0.251896	1	0.994
RFC4	3.06798e-54	0.345571	0.695	0.384	4.85446e-50	1.06044e-111	0.33348	0.532	0.229	1.67793e-107	3.06798e-54	2.12088e-111	4.06502e-111		PRC1	8.27682e-37	-0.345771	0.028	0.437	1.30964e-32	3.28257e-155	-0.559729	0.047	0.492	5.19401e-151	8.27682e-37	6.56515e-155	2.57135e-154		PRMT1	9.48157e-41	-0.348106	0.959	0.953	1.50027e-36	3.39021e-162	-0.63001	0.82	0.895	5.36433e-158	9.48157e-41	6.78041e-162	5.14181e-161		PSMB2	4.11875e-20	0.251781	0.993	0.98
RPA3	5.45949e-45	0.343708	0.971	0.864	8.63855e-41	1.62775e-111	0.393731	0.939	0.768	2.57559e-107	5.45949e-45	3.2555e-111	5.99013e-111		CENPW	7.53547e-42	-0.436816	0.267	0.715	1.19234e-37	6.3897e-145	-0.462717	0.083	0.524	1.01104e-140	7.53547e-42	1.27794e-144	4.80506e-144		ANXA1	1.56477e-54	-0.629551	0.955	0.956	2.47593e-50	2.22741e-159	-0.734894	0.941	0.924	3.52443e-155	1.56477e-54	4.45482e-159	3.24311e-158		HSPB1	2.41093e-29	0.362531	1	0.993
RFC2	1.09729e-37	0.298681	0.781	0.578	1.73624e-33	6.53588e-107	0.340446	0.58	0.273	1.03417e-102	1.09729e-37	1.30718e-106	2.3127e-106		NUDT1	1.52468e-29	-0.353463	0.598	0.883	2.4125e-25	7.04505e-137	-0.505978	0.343	0.752	1.11474e-132	1.52468e-29	1.40901e-136	5.09411e-136		SERF2	1.30069e-77	0.296498	1	1	2.05809e-73	3.47762e-157	0.279779	1	1	5.50265e-153	1.30069e-77	6.95525e-157	4.86867e-156		C19orf43	2.84575e-52	-0.366748	0.997	0.998
H2AFZ	5.22489e-44	0.289622	1	0.997	8.26734e-40	2.47436e-100	0.29095	0.997	0.974	3.91519e-96	5.22489e-44	4.94873e-100	8.43117e-100		MT2A	1.13663e-17	-0.467643	0.722	0.877	1.79849e-13	3.02916e-133	-0.678842	0.668	0.9	4.79304e-129	1.13663e-17	6.05832e-133	2.10919e-132		NASP	9.7192e-17	-0.252856	0.713	0.738	1.53787e-12	2.22391e-153	-0.690682	0.632	0.803	3.51889e-149	9.7192e-17	4.44781e-153	2.99815e-152		CDK1	2.17993e-33	-0.404858	0.059	0.444
STRA13	2.51706e-36	0.28809	0.976	0.864	3.98275e-32	2.41945e-99	0.368487	0.909	0.673	3.8283e-95	2.51706e-36	4.83891e-99	7.94964e-99		ATAD2	3.67701e-37	-0.537929	0.395	0.75	5.81814e-33	1.00953e-131	-0.595222	0.292	0.689	1.59738e-127	3.67701e-37	2.01906e-131	6.77827e-131		NCL	3.21603e-40	-0.366995	0.966	0.965	5.08873e-36	3.42316e-152	-0.671662	0.907	0.905	5.41646e-148	3.21603e-40	6.84632e-152	4.45011e-151		TUBA1B	2.92217e-49	0.412284	1	0.997
UBE2T	5.03154e-53	0.370246	0.954	0.755	7.96141e-49	4.68031e-98	0.357645	0.776	0.483	7.40565e-94	5.03154e-53	9.36061e-98	1.48479e-97		CEP55	7.73942e-37	-0.34495	0.053	0.47	1.22461e-32	4.34744e-130	-0.445373	0.035	0.427	6.87896e-126	7.73942e-37	8.69488e-130	2.81834e-129		PSMB3	1.45898e-77	-0.446029	0.993	0.995	2.30854e-73	1.55508e-151	-0.583486	0.876	0.919	2.46061e-147	1.45898e-77	3.11017e-151	1.9519e-150		ILF2	5.51455e-26	0.297057	1	0.98
SMC2	2.18227e-31	0.254259	0.806	0.56	3.453e-27	6.47706e-94	0.327291	0.612	0.316	1.02486e-89	2.18227e-31	1.29541e-93	1.9863e-93		ASPM	5.68455e-33	-0.37779	0.057	0.45	8.99466e-29	7.30508e-129	-0.519611	0.034	0.421	1.15588e-124	5.68455e-33	1.46102e-128	4.57785e-128		SKP1	3.70315e-82	-0.504285	0.991	0.989	5.8595e-78	4.71019e-151	-0.533034	0.95	0.929	7.45294e-147	3.70315e-82	9.42038e-151	5.71503e-150		ASF1B	4.98884e-47	-0.56632	0.286	0.717
TK1	3.73455e-25	0.277295	0.793	0.603	5.90918e-21	1.57421e-92	0.357021	0.679	0.396	2.49088e-88	3.73455e-25	3.14842e-92	4.67186e-92		CCNB2	3.74431e-32	-0.465346	0.093	0.471	5.92462e-28	4.39949e-127	-0.554959	0.075	0.469	6.96131e-123	3.74431e-32	8.79898e-127	2.66808e-126		UBB	1.09918e-92	-0.549963	1	0.999	1.73924e-88	3.46761e-150	-0.51463	0.982	0.966	5.48681e-146	1.09918e-92	6.93523e-150	4.07165e-149		PSMA4	4.98046e-26	0.287302	0.993	0.978
CARHSP1	1.56684e-57	0.36926	0.985	0.869	2.47922e-53	1.9236e-89	0.343844	0.896	0.719	3.04371e-85	1.56684e-57	3.8472e-89	5.53035e-89		BCL2L12	3.13687e-45	-0.460193	0.58	0.913	4.96348e-41	4.49308e-124	-0.440663	0.212	0.635	7.1094e-120	3.13687e-45	8.98616e-124	2.63969e-123		DDX5	4.53144e-52	-0.445679	0.767	0.862	7.1701e-48	5.82406e-146	-0.611961	0.735	0.834	9.21541e-142	4.53144e-52	1.16481e-145	6.62487e-145		KIAA0101	1.52278e-45	-0.779688	0.561	0.813
GMNN	1.2753e-42	0.306202	0.744	0.49	2.01791e-38	4.78787e-87	0.280359	0.541	0.265	7.57585e-83	1.2753e-42	9.57574e-87	1.3348e-86		NUCKS1	1.6274e-44	-0.486249	0.986	0.997	2.57504e-40	6.64204e-123	-0.45907	0.9	0.977	1.05097e-118	1.6274e-44	1.32841e-122	3.78395e-122		PPIA	3.09483e-88	-0.348593	1	1	4.89694e-84	1.60164e-143	-0.324966	1	0.996	2.53428e-139	3.09483e-88	3.20328e-143	1.76666e-142		PSMD8	1.51381e-26	0.262197	1	0.986
ZWINT	6.70911e-38	0.28713	0.658	0.389	1.06158e-33	1.33701e-85	0.288247	0.503	0.239	2.11555e-81	6.70911e-38	2.67402e-85	3.61779e-85		NUF2	2.87816e-52	-0.608203	0.043	0.56	4.55411e-48	6.00241e-122	-0.473176	0.042	0.418	9.49761e-118	2.87816e-52	1.20048e-121	3.31898e-121		EIF4A1	1.38982e-84	-0.638983	0.986	0.989	2.19911e-80	1.06495e-142	-0.552828	0.922	0.935	1.68507e-138	1.38982e-84	2.1299e-142	1.14012e-141		NUSAP1	4.12778e-31	-0.527633	0.244	0.579
BRCA2	4.58479e-46	0.279701	0.598	0.306	7.25451e-42	1.97224e-85	0.262301	0.424	0.175	3.12068e-81	4.58479e-46	3.94448e-85	5.18418e-85		STMN1	2.79489e-32	-0.490317	0.996	0.998	4.42236e-28	1.06556e-121	-0.498367	0.992	0.984	1.68604e-117	2.79489e-32	2.13113e-121	5.7236e-121		HNRNPA2B1	5.96581e-80	-0.526635	0.993	0.993	9.4397e-76	5.17416e-142	-0.552763	0.96	0.943	8.18708e-138	5.96581e-80	1.03483e-141	5.38113e-141		PFDN2	1.05608e-29	0.265689	1	0.998
DNMT1	5.92695e-39	0.293486	0.943	0.813	9.37822e-35	8.64927e-84	0.326652	0.816	0.578	1.36857e-79	5.92695e-39	1.72985e-83	2.21037e-83		TK1	1.17854e-46	-0.49155	0.263	0.721	1.8648e-42	6.65433e-121	-0.440721	0.14	0.546	1.05291e-116	1.17854e-46	1.33087e-120	3.47504e-120		PRDX2	1.19289e-79	-0.353696	1	1	1.88751e-75	5.95303e-142	-0.436777	0.992	0.981	9.41948e-138	1.19289e-79	1.19061e-141	6.01917e-141		EPCAM	8.74579e-26	0.261797	1	0.992
DNAJC9	1.20791e-41	0.297138	0.863	0.661	1.91128e-37	4.37875e-82	0.293513	0.569	0.307	6.92849e-78	1.20791e-41	8.7575e-82	1.08877e-81		DUT	3.88633e-27	-0.380627	0.772	0.929	6.14934e-23	2.21395e-120	-0.529001	0.657	0.873	3.50313e-116	3.88633e-27	4.42789e-120	1.12492e-119		LDHB	2.29578e-36	-0.311419	0.995	0.997	3.63261e-32	2.21109e-141	-0.462899	0.983	0.969	3.49862e-137	2.29578e-36	4.42219e-141	2.17524e-140		ENO1	2.04108e-43	0.398248	1	0.998
RMI2	2.90739e-63	0.32987	0.669	0.315	4.60037e-59	7.37265e-82	0.260856	0.421	0.181	1.16657e-77	2.90739e-63	1.47453e-81	1.78496e-81		LSM5	1.83611e-21	-0.264598	0.918	0.986	2.90528e-17	2.74389e-112	-0.397965	0.782	0.936	4.34165e-108	1.83611e-21	5.48778e-112	1.3575e-111		2021-09-07	3.14541e-28	-0.271618	0.973	0.967	4.97698e-24	6.32638e-139	-0.574222	0.776	0.852	1.00102e-134	3.14541e-28	1.26528e-138	6.06001e-138		E2F1	3.64112e-41	-0.459871	0.174	0.601
CHAF1A	6.80439e-49	0.296113	0.671	0.363	1.07666e-44	2.29617e-73	0.252567	0.437	0.205	3.63324e-69	6.80439e-49	4.59235e-73	5.41662e-73		ANLN	2.10937e-35	-0.345022	0.06	0.473	3.33765e-31	1.68178e-110	-0.427557	0.052	0.41	2.66108e-106	2.10937e-35	3.36356e-110	8.10704e-110		ILF2	9.18968e-93	-0.594869	0.984	0.982	1.45408e-88	3.05121e-137	-0.539882	0.9	0.899	4.82793e-133	9.18968e-93	6.10241e-137	2.84779e-136		CKS2	8.29526e-41	-0.783086	0.878	0.959
SIVA1	4.06791e-43	0.283727	1	0.96	6.43665e-39	4.5022e-67	0.275024	0.965	0.843	7.12383e-63	4.06791e-43	9.00439e-67	1.03551e-66		PHF19	6.35677e-47	-0.488315	0.242	0.708	1.00583e-42	3.06271e-110	-0.415167	0.183	0.581	4.84612e-106	6.35677e-47	6.12542e-110	1.43947e-109		TMSB10	9.70952e-61	0.276761	1	0.999	1.53634e-56	2.09614e-136	0.306732	1	0.998	3.31672e-132	9.70952e-61	4.19228e-136	1.90749e-135		RRM2	1.73694e-40	-0.529528	0.213	0.619
EMP2	1.5695e-26	0.268182	0.729	0.544	2.48342e-22	3.34403e-56	0.258226	0.646	0.436	5.29125e-52	1.5695e-26	6.68805e-56	7.50367e-56		RNASEH2A	2.98515e-49	-0.558763	0.726	0.945	4.7234e-45	4.80485e-109	-0.523259	0.427	0.762	7.60272e-105	2.98515e-49	9.60971e-109	2.2032e-108		CALM2	1.29943e-66	-0.484004	0.998	1	2.05609e-62	3.47597e-133	-0.541902	0.997	0.981	5.50002e-129	1.29943e-66	6.95193e-133	3.08598e-132		DCAF13	5.96344e-28	0.27749	0.916	0.76
PTTG1	1.8152e-28	-0.684821	0.647	0.722	2.87219e-24	1.34112e-38	-0.55734	0.44	0.551	2.12206e-34	1.8152e-28	2.68225e-38	2.9377e-38		MGP	0.369437	0.403496	0.655	0.704	1	1.15406e-108	0.750426	0.99	0.946	1.82607e-104	0.369437	2.30812e-108	5.16578e-108		LAPTM4A	4.54478e-50	-0.444323	0.88	0.921	7.1912e-46	1.7998e-132	-0.553812	0.792	0.86	2.84782e-128	4.54478e-50	3.5996e-132	1.55983e-131		PSMB1	1.02303e-25	0.268749	0.993	0.994
CCNB1	8.15432e-17	-0.348154	0.196	0.363	1.29026e-12	3.92485e-28	-0.307322	0.158	0.3	6.21029e-24	8.15432e-17	7.8497e-28	8.39735e-28		ASF1B	3.07916e-62	-0.6518	0.181	0.733	4.87215e-58	1.91927e-104	-0.380462	0.07	0.424	3.03686e-100	3.07916e-62	3.83853e-104	8.39121e-104		HSPA8	1.17871e-42	-0.499857	0.948	0.979	1.86508e-38	6.85408e-131	-0.526496	0.94	0.929	1.08452e-126	1.17871e-42	1.37082e-130	5.80206e-130		HNRNPK	2.57358e-38	0.367137	0.997	0.971
UBE2S	2.59034e-23	-0.589096	0.984	0.963	4.09869e-19	1.90936e-25	-0.508417	0.924	0.852	3.02119e-21	2.59034e-23	3.81873e-25	3.99231e-25		HMMR	2.0997e-35	-0.391915	0.021	0.417	3.32235e-31	5.12693e-103	-0.403585	0.011	0.33	8.11234e-99	2.0997e-35	1.02539e-102	2.1906e-102		NDUFS2	1.15346e-65	-0.479678	0.867	0.931	1.82512e-61	6.49591e-130	-0.568298	0.623	0.785	1.02785e-125	1.15346e-65	1.29918e-129	5.37389e-129		SKP1	1.82787e-22	0.25254	1	0.988
CDKN3	1.50036e-17	-0.443007	0.715	0.758	2.37402e-13	8.2327e-23	-0.319412	0.376	0.472	1.30266e-18	1.50036e-17	1.64654e-22	1.68313e-22		RPL39L	3.59731e-58	-0.552214	0.594	0.905	5.69203e-54	1.01872e-102	-0.404854	0.295	0.673	1.61192e-98	3.59731e-58	2.03744e-102	4.25599e-102		MGST1	7.24549e-33	-0.280469	1	0.998	1.14645e-28	1.48838e-127	-0.431243	0.989	0.961	2.35506e-123	7.24549e-33	2.97675e-127	1.20393e-126		HNRNPA2B1	6.11827e-37	0.329372	1	0.992
CDC20	0.0863786	-0.775629	0.927	0.778	1	5.30364e-06	-0.589976	0.648	0.545	0.0839195	0.0863786	1.06073e-05	1.06073e-05		SMC2	6.08975e-47	-0.47095	0.21	0.698	9.63581e-43	2.75978e-102	-0.380815	0.099	0.459	4.3668e-98	6.08975e-47	5.51955e-102	1.12791e-101		AZGP1	1.97029e-38	-0.493286	0.964	0.956	3.1176e-34	3.02739e-126	-0.542603	0.978	0.951	4.79024e-122	1.97029e-38	6.05478e-126	2.39559e-125		FEN1	1.14862e-35	-0.460593	0.324	0.692
															HMGN2	2.02243e-27	-0.35831	0.957	0.994	3.20009e-23	9.38647e-102	-0.426611	0.802	0.941	1.48522e-97	2.02243e-27	1.87729e-101	3.75459e-101		TALDO1	1.49574e-30	-0.295198	0.982	0.988	2.36671e-26	1.07342e-124	-0.477491	0.916	0.922	1.69847e-120	1.49574e-30	2.14683e-124	8.31326e-124		CDT1	4.73779e-27	-0.315379	0.164	0.512
															NDC80	4.2835e-33	-0.344844	0.021	0.398	6.77778e-29	2.12927e-96	-0.391836	0.025	0.336	3.36915e-92	4.2835e-33	4.25855e-96	8.33965e-96		EPRS	8.83069e-28	-0.306188	0.828	0.867	1.39728e-23	1.90148e-123	-0.553649	0.717	0.822	3.00871e-119	8.83069e-28	3.80296e-123	1.44195e-122		GAL	2.28585e-27	0.305112	0.997	0.989
															CDK1	2.84044e-34	-0.409488	0.05	0.444	4.49442e-30	4.71768e-96	-0.411556	0.048	0.369	7.46478e-92	2.84044e-34	9.43536e-96	1.81005e-95		PSMA4	2.37702e-78	-0.512182	0.968	0.983	3.76116e-74	2.80649e-121	-0.506821	0.888	0.898	4.44071e-117	2.37702e-78	5.61298e-121	2.08482e-120		C19orf48	6.93724e-34	-0.387059	0.704	0.897
															MAD2L1	3.66113e-29	-0.292953	0.11	0.497	5.79301e-25	2.08971e-94	-0.368689	0.091	0.429	3.30655e-90	3.66113e-29	4.17943e-94	7.85732e-94		STMN1	5.99545e-86	-0.653267	1	0.997	9.48661e-82	1.43566e-120	-0.544375	0.996	0.984	2.27165e-116	5.99545e-86	2.87133e-120	1.04516e-119		CARHSP1	2.92278e-31	-0.391629	0.798	0.918
															PKMYT1	2.16231e-33	-0.320523	0.1	0.5	3.42143e-29	3.1722e-92	-0.306954	0.045	0.361	5.01937e-88	2.16231e-33	6.3444e-92	1.16936e-91		MGST3	1.10119e-119	-0.614824	0.993	0.998	1.74242e-115	1.26897e-110	-0.444442	0.938	0.943	2.00789e-106	1.26897e-110	2.20239e-119	7.8595e-119		HELLS	2.87691e-31	-0.354838	0.213	0.588
															H2AFV	1.42001e-36	-0.374606	0.918	0.988	2.24687e-32	3.79806e-90	-0.371716	0.685	0.906	6.00967e-86	1.42001e-36	7.59611e-90	1.37314e-89		CCT5	5.62843e-59	-0.496124	0.794	0.883	8.90586e-55	1.13064e-112	-0.529464	0.67	0.783	1.78901e-108	5.62843e-59	2.26128e-112	7.91448e-112		CALM2	2.6233e-18	-0.320831	1	0.999
															RARRES1	2.71788e-08	0.342939	0.915	0.895	0.000430049	2.13898e-89	0.489718	0.96	0.915	3.38451e-85	2.71788e-08	4.27796e-89	7.58732e-89		DNAJA1	4.01076e-45	-0.426131	0.833	0.887	6.34622e-41	2.22484e-106	-0.532722	0.761	0.815	3.52037e-102	4.01076e-45	4.44969e-106	1.52801e-105		DUT	2.53766e-30	-0.401269	0.826	0.92
															CENPA	1.35498e-32	-0.464237	0.064	0.441	2.14398e-28	4.03514e-88	-0.325691	0.017	0.304	6.3848e-84	1.35498e-32	8.07027e-88	1.40483e-87		PSMD2	1.05205e-71	-0.499946	0.857	0.934	1.66466e-67	3.34257e-106	-0.512621	0.677	0.783	5.28895e-102	1.05205e-71	6.68514e-106	2.25314e-105		MRPL3	8.93098e-22	0.285171	0.934	0.886
															ANP32E	3.85031e-34	-0.468371	0.754	0.937	6.09234e-30	4.91204e-88	-0.49123	0.586	0.838	7.77232e-84	3.85031e-34	9.82408e-88	1.67903e-87		PUF60	1.17619e-53	-0.396451	0.943	0.958	1.86108e-49	1.3264e-103	-0.463926	0.848	0.871	2.09876e-99	1.17619e-53	2.65279e-103	8.77833e-103		ASPM	1.9191e-19	-0.304871	0.15	0.435
															DTYMK	5.7326e-28	-0.330146	0.399	0.745	9.07069e-24	1.30803e-86	-0.344632	0.183	0.531	2.0697e-82	5.7326e-28	2.61606e-86	4.39125e-86		CD63	2.45485e-41	-0.337523	0.995	0.99	3.88431e-37	1.25359e-101	-0.488079	0.873	0.873	1.98355e-97	2.45485e-41	2.50718e-101	8.14832e-101		EIF3I	1.58377e-27	0.308303	0.969	0.904
															KIF20B	3.79628e-28	-0.282209	0.053	0.4	6.00686e-24	3.35995e-84	-0.298723	0.029	0.313	5.31645e-80	3.79628e-28	6.7199e-84	1.10819e-83		PSMA3	1.28608e-59	-0.429186	0.898	0.934	2.03497e-55	3.18837e-101	-0.479239	0.796	0.826	5.04496e-97	1.28608e-59	6.37674e-101	2.03608e-100		ANLN	1.90639e-22	-0.268468	0.146	0.459
															CCNB1	1.8258e-16	-0.355592	0.107	0.352	2.88896e-12	6.41855e-83	-0.41816	0.042	0.328	1.01561e-78	1.8258e-16	1.28371e-82	2.0805e-82		B2M	2.40385e-69	-0.450616	1	1	3.80361e-65	3.49499e-101	-0.393936	0.998	0.988	5.53012e-97	2.40385e-69	6.98998e-101	2.19341e-100		BUB3	4.36581e-15	-0.269093	0.617	0.792
															PLK1	4.79465e-27	-0.369393	0.025	0.348	7.58658e-23	9.29727e-83	-0.333924	0.014	0.285	1.47111e-78	4.79465e-27	1.85945e-82	2.96252e-82		ALDOA	4.99002e-43	-0.263727	1	0.999	7.89571e-39	5.7676e-101	-0.342628	0.997	0.979	9.12608e-97	4.99002e-43	1.15352e-100	3.55832e-100		STRA13	2.79388e-19	-0.301685	0.808	0.91
															CENPM	1.20554e-28	-0.283834	0.128	0.506	1.90753e-24	3.39259e-82	-0.283771	0.06	0.361	5.36809e-78	1.20554e-28	6.78517e-82	1.06301e-81		PSMB2	4.21617e-57	-0.405076	0.984	0.981	6.67125e-53	1.54002e-100	-0.482648	0.781	0.837	2.43678e-96	4.21617e-57	3.08004e-100	9.3428e-100		PCNA	2.89328e-14	-0.294759	0.474	0.673
															CCNA2	1.58e-32	-0.319704	0.021	0.394	2.50004e-28	9.76298e-82	-0.286219	0.013	0.282	1.5448e-77	1.58e-32	1.9526e-81	3.00892e-81		PSMB1	3.64621e-65	-0.415462	0.991	0.995	5.76939e-61	1.87826e-100	-0.461626	0.889	0.896	2.97197e-96	3.64621e-65	3.75651e-100	1.1208e-99		ATF4	1.07422e-14	-0.265206	0.537	0.744
															UBE2T	6.15992e-25	-0.383044	0.601	0.844	9.74684e-21	1.94471e-80	-0.378616	0.283	0.62	3.07712e-76	6.15992e-25	3.88942e-80	5.89687e-80		TUBB4B	3.77507e-42	-0.471699	0.855	0.876	5.97329e-38	6.97547e-99	-0.583866	0.768	0.811	1.10373e-94	3.77507e-42	1.39509e-98	4.09528e-98		KPNA2	4.05131e-08	-0.281592	0.394	0.559
															RPA3	1.10387e-21	-0.326115	0.747	0.918	1.74665e-17	1.27332e-78	-0.385706	0.616	0.857	2.01478e-74	1.10387e-21	2.54665e-78	3.79976e-78		IFITM3	2.94805e-51	-0.404498	1	0.988	4.6647e-47	1.49041e-98	-0.409999	0.994	0.969	2.35828e-94	2.94805e-51	2.98082e-98	8.61127e-98		TPX2	1.99844e-21	-0.394824	0.244	0.541
															TMEM160	1.8091e-21	-0.285751	0.843	0.957	2.86254e-17	6.36772e-78	-0.338951	0.534	0.809	1.00756e-73	1.8091e-21	1.27354e-77	1.87052e-77		PPIB	1.0771e-29	-0.286123	0.986	0.978	1.70429e-25	1.65413e-98	-0.452921	0.886	0.886	2.61732e-94	1.0771e-29	3.30825e-98	9.40784e-98		CDC20	8.84423e-10	0.279281	0.895	0.807
															ARL6IP1	3.43148e-17	-0.348827	0.395	0.674	5.42963e-13	1.09463e-76	-0.411565	0.237	0.56	1.73203e-72	3.43148e-17	2.18925e-76	3.166e-76		PPP1R14B	1.84253e-72	0.358167	1	0.988	2.91543e-68	3.04718e-98	0.284984	1	0.989	4.82156e-94	1.84253e-72	6.09436e-98	1.70642e-97		MKI67	3.50508e-16	-0.51399	0.505	0.652
															SIVA1	4.67535e-44	-0.439076	0.922	0.979	7.39781e-40	2.88789e-76	-0.329341	0.739	0.906	4.5695e-72	4.67535e-44	5.77577e-76	8.2261e-76		CCT8	6.5501e-30	-0.319333	0.889	0.905	1.03642e-25	5.95364e-98	-0.468295	0.796	0.83	9.42044e-94	6.5501e-30	1.19073e-97	3.28352e-97		MGP	3.6439e-17	-0.676656	0.512	0.729
															CEBPD	1.76846e-10	0.333235	0.879	0.867	2.79823e-06	5.14365e-76	0.364122	0.946	0.896	8.13879e-72	1.76846e-10	1.02873e-75	1.44329e-75		FDPS	4.27792e-26	-0.293248	0.971	0.964	6.76895e-22	3.95202e-96	-0.487379	0.814	0.838	6.25329e-92	4.27792e-26	7.90405e-96	2.14707e-95		HSPA2	1.02176e-10	-0.273018	0.592	0.769
															ZWINT	1.54412e-27	-0.306941	0.153	0.515	2.44326e-23	3.47907e-74	-0.271846	0.074	0.359	5.50494e-70	1.54412e-27	6.95815e-74	9.61862e-74		CFL1	1.94245e-70	-0.35828	1	1	3.07354e-66	1.27047e-95	-0.32787	0.994	0.979	2.01026e-91	1.94245e-70	2.54093e-95	6.80073e-95		RGS5	8.93474e-05	-0.300247	0.401	0.53
															LSM3	1.09726e-27	-0.312194	0.843	0.965	1.73619e-23	1.01767e-73	-0.349128	0.55	0.821	1.61026e-69	1.09726e-27	2.03535e-73	2.77279e-73		PSMC3	6.48574e-57	-0.413865	0.93	0.956	1.02624e-52	1.04539e-93	-0.474959	0.762	0.801	1.65412e-89	6.48574e-57	2.09078e-93	5.51482e-93
															MAL2	1.70348e-19	-0.289991	0.886	0.969	2.69541e-15	3.74139e-72	-0.347861	0.706	0.889	5.92e-68	1.70348e-19	7.48277e-72	1.00483e-71		SPCS2	6.39404e-36	-0.348484	0.848	0.883	1.01173e-31	1.24685e-93	-0.458809	0.802	0.826	1.97289e-89	6.39404e-36	2.4937e-93	6.48361e-93
															CDKN2D	1.26183e-20	-0.266551	0.167	0.48	1.99659e-16	1.11701e-71	-0.288902	0.11	0.407	1.76744e-67	1.26183e-20	2.23401e-71	2.95771e-71		HNRNPK	1.18625e-79	-0.519515	0.964	0.978	1.87701e-75	9.24485e-88	-0.415479	0.911	0.883	1.46281e-83	1.18625e-79	1.84897e-87	4.73961e-87
															CLSPN	5.81542e-34	-0.401711	0.16	0.564	9.20175e-30	1.28021e-70	-0.287734	0.062	0.332	2.02568e-66	5.81542e-34	2.56043e-70	3.34278e-70		PSMD8	4.92536e-54	-0.368715	0.989	0.988	7.7934e-50	2.9899e-87	-0.405807	0.907	0.891	4.73092e-83	4.92536e-54	5.9798e-87	1.51156e-86
															LSM4	3.70703e-36	-0.34767	0.957	0.994	5.86564e-32	1.59892e-70	-0.312068	0.7	0.891	2.52997e-66	3.70703e-36	3.19784e-70	4.11776e-70		DCAF13	3.83067e-46	-0.42642	0.692	0.809	6.06127e-42	3.07068e-87	-0.488448	0.506	0.675	4.85874e-83	3.83067e-46	6.14136e-87	1.53113e-86
															RAD23A	2.95122e-31	-0.272864	0.996	0.999	4.66971e-27	6.34129e-69	-0.278189	0.891	0.964	1.00338e-64	2.95122e-31	1.26826e-68	1.61103e-68		MMP7	5.02072e-17	-0.530121	0.934	0.915	7.94429e-13	6.82554e-86	-0.601298	0.806	0.832	1.08001e-81	5.02072e-17	1.36511e-85	3.35743e-85
															DEK	1.13861e-25	-0.308575	0.893	0.973	1.80162e-21	2.5731e-67	-0.30876	0.744	0.907	4.07142e-63	1.13861e-25	5.1462e-67	6.4499e-67		SRI	5.80169e-36	-0.307575	0.937	0.962	9.18002e-32	1.24832e-85	-0.445686	0.841	0.852	1.97521e-81	5.80169e-36	2.49664e-85	6.05851e-85
															CCDC34	3.98446e-22	-0.306817	0.573	0.827	6.30461e-18	5.39158e-66	-0.332213	0.469	0.76	8.53109e-62	3.98446e-22	1.07832e-65	1.33371e-65		NUDC	7.94234e-45	-0.376123	0.855	0.893	1.25672e-40	8.06131e-85	-0.456968	0.638	0.749	1.27554e-80	7.94234e-45	1.61226e-84	3.86094e-84
															MALAT1	1.92322e-15	0.287248	1	0.999	3.04311e-11	1.28685e-64	0.361315	0.996	0.995	2.03618e-60	1.92322e-15	2.57369e-64	3.14191e-64		SNRPD3	1.79862e-43	-0.335189	0.9	0.92	2.84596e-39	2.1332e-84	-0.404791	0.84	0.852	3.37536e-80	1.79862e-43	4.2664e-84	1.00842e-83
															AURKA	3.87564e-22	-0.402487	0.082	0.377	6.13242e-18	2.90315e-64	-0.304383	0.041	0.279	4.59365e-60	3.87564e-22	5.80629e-64	6.99733e-64		XRCC6	2.38375e-46	-0.413438	0.724	0.82	3.7718e-42	4.01008e-83	-0.449216	0.584	0.709	6.34516e-79	2.38375e-46	8.02017e-83	1.87137e-82
															CENPE	2.06555e-20	-0.256129	0.025	0.283	3.26831e-16	3.4717e-61	-0.253316	0.017	0.232	5.49327e-57	2.06555e-20	6.9434e-61	8.26176e-61		PSMB5	1.18884e-82	-0.468662	0.977	0.992	1.8811e-78	2.58042e-46	-0.26964	0.964	0.904	4.083e-42	2.58042e-46	2.37768e-82	5.47769e-82
															PGP	2.86963e-19	-0.278121	0.623	0.834	4.54061e-15	7.46864e-61	-0.277505	0.261	0.58	1.18176e-56	2.86963e-19	1.49373e-60	1.75513e-60		SSBP1	1.87755e-71	-0.455	0.957	0.984	2.97085e-67	1.24431e-81	-0.397993	0.868	0.872	1.96887e-77	1.87755e-71	2.48862e-81	5.66161e-81
															C11orf83	2.78037e-17	-0.259604	0.929	0.972	4.39938e-13	9.21979e-60	-0.297697	0.683	0.87	1.45885e-55	2.78037e-17	1.84396e-59	2.1399e-59		HNRNPM	8.76682e-40	-0.367687	0.837	0.88	1.38717e-35	2.38817e-81	-0.437895	0.775	0.807	3.7788e-77	8.76682e-40	4.77634e-81	1.0732e-80
															HNRNPAB	9.17831e-23	-0.287859	0.851	0.958	1.45228e-18	2.08979e-58	-0.294085	0.772	0.921	3.30667e-54	9.17831e-23	4.17957e-58	4.79122e-58		PPDPF	4.14388e-58	0.269948	1	0.994	6.55686e-54	4.71883e-81	0.266745	1	0.961	7.46661e-77	4.14388e-58	9.43767e-81	2.0947e-80
															FOS	1.30678e-09	0.268571	0.822	0.79	2.06771e-05	6.18019e-52	0.330482	0.929	0.876	9.77892e-48	1.30678e-09	1.23604e-51	1.39985e-51		PSMA5	1.30977e-51	-0.41055	0.914	0.932	2.07245e-47	5.09589e-81	-0.435453	0.646	0.729	8.06322e-77	1.30977e-51	1.01918e-80	2.23482e-80
															DDX39A	7.07089e-18	-0.313655	0.811	0.953	1.11883e-13	9.34005e-51	-0.317373	0.447	0.711	1.47788e-46	7.07089e-18	1.86801e-50	2.09039e-50		CCT6A	8.02461e-28	-0.272962	0.991	0.982	1.26973e-23	7.69733e-81	-0.394024	0.925	0.886	1.21795e-76	8.02461e-28	1.53947e-80	3.33551e-80
															HN1	7.23517e-16	-0.281706	0.929	0.981	1.14482e-11	1.4502e-49	-0.283541	0.876	0.937	2.29465e-45	7.23517e-16	2.9004e-49	3.2075e-49		TECR	1.79317e-37	-0.291805	0.998	0.996	2.83733e-33	9.07136e-81	-0.362832	0.973	0.948	1.43536e-76	1.79317e-37	1.81427e-80	3.88468e-80
															KPNA2	2.0337e-07	-0.250289	0.381	0.56	0.00321792	1.6535e-49	-0.410363	0.276	0.535	2.61633e-45	2.0337e-07	3.307e-49	3.61463e-49		MDH1	8.91987e-51	-0.414634	0.563	0.773	1.41139e-46	1.62754e-77	-0.437655	0.368	0.591	2.57525e-73	8.91987e-51	3.25508e-77	6.88865e-77
															RANBP1	4.41627e-39	-0.373155	0.964	0.989	6.98786e-35	4.64396e-48	-0.261561	0.741	0.893	7.34813e-44	4.41627e-39	9.28791e-48	1.00352e-47		MYL6	4.30617e-77	-0.381638	1	0.999	6.81365e-73	1.28459e-58	-0.263034	0.994	0.973	2.0326e-54	1.28459e-58	8.61234e-77	1.80166e-76
															KIF5B	1.60875e-18	-0.285172	0.794	0.946	2.54553e-14	1.19745e-46	-0.283384	0.644	0.832	1.89472e-42	1.60875e-18	2.3949e-46	2.55819e-46		HNRNPU	2.24458e-31	-0.326731	0.862	0.889	3.5516e-27	9.37999e-76	-0.459011	0.797	0.801	1.4842e-71	2.24458e-31	1.876e-75	3.87991e-75
															RHEB	1.26734e-33	-0.351942	0.907	0.983	2.00531e-29	2.34868e-46	-0.25578	0.658	0.849	3.71632e-42	1.26734e-33	4.69736e-46	4.96126e-46		TXN	1.59044e-62	-0.292317	1	0.999	2.51656e-58	1.30618e-74	-0.290924	0.997	0.976	2.06676e-70	1.59044e-62	2.61235e-74	5.34211e-74
															TOMM40	1.95627e-23	-0.308034	0.875	0.982	3.0954e-19	1.69049e-44	-0.261023	0.445	0.703	2.67486e-40	1.95627e-23	3.38098e-44	3.53124e-44		PSMD4	2.84656e-72	-0.448029	0.993	0.993	4.50412e-68	8.89439e-66	-0.379377	0.799	0.805	1.40736e-61	8.89439e-66	5.69313e-72	1.15128e-71
															TUBB4B	8.07655e-10	-0.305041	0.747	0.892	1.27795e-05	1.98869e-42	-0.351991	0.681	0.837	3.1467e-38	8.07655e-10	3.97737e-42	4.10849e-42		MAGOH	4.0553e-63	-0.402368	0.986	0.984	6.4167e-59	2.22051e-69	-0.367702	0.913	0.874	3.51352e-65	4.0553e-63	4.44103e-69	8.88205e-69
															CTGF	7.51983e-05	0.31391	0.459	0.39	1	3.75551e-36	0.340474	0.512	0.377	5.94234e-32	7.51983e-05	7.51102e-36	7.6743e-36		HNRNPF	1.40918e-34	-0.31853	0.959	0.945	2.22974e-30	2.24459e-68	-0.368658	0.855	0.831	3.55161e-64	1.40918e-34	4.48918e-68	8.88076e-68
															KRT81	2.79181e-06	-0.268614	0.046	0.149	0.0441748	1.31788e-26	-0.737952	0.131	0.284	2.08529e-22	2.79181e-06	2.63577e-26	2.66411e-26		PGK1	6.44349e-67	-0.550879	0.891	0.941	1.01955e-62	1.17219e-66	-0.38802	0.724	0.751	1.85476e-62	1.17219e-66	1.2887e-66	2.52197e-66
															ID1	2.27651e-08	0.368118	0.701	0.631	0.000360212	4.12991e-24	0.285889	0.717	0.67	6.53476e-20	2.27651e-08	8.25982e-24	8.25982e-24		TMBIM6	5.30749e-35	-0.356603	0.76	0.837	8.39804e-31	2.33157e-66	-0.407222	0.671	0.721	3.68924e-62	5.30749e-35	4.66313e-66	9.02862e-66
																														DSP	4.97117e-17	-0.256369	0.848	0.818	7.86589e-13	3.56279e-66	-0.448219	0.88	0.836	5.6374e-62	4.97117e-17	7.12558e-66	1.36511e-65
																														PSMB7	8.73517e-45	-0.323051	0.995	0.991	1.38217e-40	1.40976e-65	-0.388489	0.765	0.797	2.23066e-61	8.73517e-45	2.81952e-65	5.34534e-65
																														HSPA2	2.09098e-34	-0.411284	0.663	0.766	3.30855e-30	2.00316e-65	-0.488154	0.68	0.72	3.16961e-61	2.09098e-34	4.00633e-65	7.51703e-65
																														RBM8A	2.78096e-65	-0.418901	0.991	0.996	4.40031e-61	2.32132e-52	-0.294436	0.963	0.911	3.67302e-48	2.32132e-52	5.56192e-65	1.03293e-64
																														CD9	1.9779e-23	-0.300479	0.837	0.867	3.12963e-19	3.88466e-64	-0.394793	0.716	0.744	6.1467e-60	1.9779e-23	7.76933e-64	1.4283e-63
																														PKM	1.96007e-47	-0.351459	0.998	0.997	3.10142e-43	6.75004e-64	-0.32258	0.977	0.931	1.06806e-59	1.96007e-47	1.35001e-63	2.45701e-63
																														MRPL13	9.80716e-64	-0.432095	0.878	0.939	1.55179e-59	5.67593e-45	-0.306925	0.769	0.769	8.98103e-41	5.67593e-45	1.96143e-63	3.53446e-63
																														COPE	1.68963e-29	-0.252605	0.989	0.977	2.6735e-25	8.74618e-62	-0.370619	0.802	0.807	1.38391e-57	1.68963e-29	1.74924e-61	3.12118e-61
																														EIF3I	9.83462e-62	-0.451276	0.869	0.926	1.55613e-57	3.44146e-31	-0.285626	0.687	0.667	5.44543e-27	3.44146e-31	1.96692e-61	3.47553e-61
																														PDIA6	2.97971e-36	-0.353344	0.952	0.95	4.7148e-32	1.66603e-61	-0.38734	0.726	0.754	2.63615e-57	2.97971e-36	3.33205e-61	5.83109e-61
																														PPA1	2.87083e-24	-0.252664	0.98	0.969	4.54251e-20	2.18914e-61	-0.308794	0.976	0.929	3.46388e-57	2.87083e-24	4.37828e-61	7.58902e-61
																														PTGES3	1.57147e-36	-0.33985	0.948	0.949	2.48654e-32	1.33257e-60	-0.342324	0.911	0.884	2.10853e-56	1.57147e-36	2.66514e-60	4.576e-60
																														HSPA5	1.01291e-22	-0.468601	0.518	0.631	1.60273e-18	4.68873e-60	-0.52528	0.532	0.638	7.41899e-56	1.01291e-22	9.37747e-60	1.59505e-59
																														SLC3A2	5.87758e-35	-0.4373	0.554	0.704	9.3001e-31	7.56274e-60	-0.433391	0.557	0.662	1.19665e-55	5.87758e-35	1.51255e-59	2.54892e-59
																														SRSF7	3.31165e-55	-0.410596	0.968	0.972	5.24002e-51	2.10031e-59	-0.383292	0.76	0.775	3.32331e-55	3.31165e-55	4.20061e-59	7.01387e-59
																														EIF6	1.27677e-35	-0.343294	0.939	0.931	2.02023e-31	2.22453e-59	-0.378851	0.731	0.76	3.51987e-55	1.27677e-35	4.44906e-59	7.36116e-59
																														CCT7	1.18447e-31	-0.337186	0.934	0.943	1.87419e-27	2.40155e-59	-0.376904	0.711	0.741	3.79997e-55	1.18447e-31	4.8031e-59	7.87535e-59
																														PSMD13	2.65028e-44	-0.369711	0.724	0.828	4.19354e-40	2.66186e-59	-0.391849	0.555	0.641	4.21187e-55	2.65028e-44	5.32373e-59	8.65106e-59
																														SF3B1	8.76197e-26	-0.26986	0.475	0.626	1.38641e-21	1.0879e-58	-0.403965	0.513	0.62	1.72138e-54	8.76197e-26	2.1758e-58	3.50438e-58
																														ACTG1	3.32777e-35	-0.377744	0.998	0.993	5.26554e-31	1.40257e-58	-0.287038	0.999	0.992	2.21929e-54	3.32777e-35	2.80514e-58	4.47838e-58
																														PSMC4	1.85297e-53	-0.467796	0.808	0.889	2.93196e-49	4.72219e-58	-0.392553	0.422	0.584	7.47191e-54	1.85297e-53	9.44437e-58	1.49467e-57
																														JUN	1.62111e-18	-0.297806	0.993	0.979	2.56508e-14	7.11141e-58	-0.42183	0.952	0.912	1.12524e-53	1.62111e-18	1.42228e-57	2.23151e-57
																														CCT2	2.02189e-24	-0.325351	0.916	0.904	3.19924e-20	1.31845e-57	-0.369742	0.74	0.747	2.08619e-53	2.02189e-24	2.63691e-57	4.10186e-57
																														PSMA1	1.40287e-53	-0.413539	0.86	0.908	2.21976e-49	1.69607e-44	-0.325259	0.761	0.75	2.68368e-40	1.69607e-44	2.80574e-53	4.3275e-53
																														HNRNPR	5.80578e-20	-0.257343	0.889	0.867	9.18649e-16	1.95013e-53	-0.368008	0.714	0.728	3.08569e-49	5.80578e-20	3.90026e-53	5.9651e-53
																														EIF4A3	1.75371e-31	-0.324991	0.511	0.667	2.77489e-27	5.8219e-53	-0.349501	0.228	0.437	9.21199e-49	1.75371e-31	1.16438e-52	1.76598e-52
																														ATP5B	1.15021e-39	-0.339388	0.986	0.988	1.81999e-35	7.23871e-53	-0.335259	0.876	0.826	1.14538e-48	1.15021e-39	1.44774e-52	2.1776e-52
																														TUBA1A	1.56136e-40	-0.49493	0.914	0.924	2.47054e-36	1.40643e-52	-0.408383	0.897	0.843	2.22539e-48	1.56136e-40	2.81285e-52	4.19622e-52
																														NME1	8.23665e-35	-0.267787	0.993	0.985	1.30328e-30	2.88729e-52	-0.308333	0.959	0.903	4.56857e-48	8.23665e-35	5.77459e-52	8.54451e-52
																														IER2	9.09916e-37	-0.364012	0.982	0.979	1.43976e-32	6.15882e-52	-0.337294	0.982	0.923	9.74511e-48	9.09916e-37	1.23176e-51	1.80791e-51
																														UBE2S	5.81341e-17	0.253195	0.998	0.96	9.19856e-13	1.07479e-51	0.310356	0.992	0.844	1.70064e-47	5.81341e-17	2.14958e-51	3.12979e-51
																														HNRNPA3	1.41448e-39	-0.340399	0.98	0.967	2.23813e-35	3.74935e-50	-0.338136	0.862	0.82	5.9326e-46	1.41448e-39	7.4987e-50	1.08315e-49
																														TMCO1	2.15069e-23	-0.25478	0.921	0.918	3.40304e-19	6.09499e-50	-0.332254	0.816	0.783	9.6441e-46	2.15069e-23	1.219e-49	1.74691e-49
																														PSMB6	1.37959e-49	-0.372249	0.977	0.984	2.18293e-45	6.21872e-34	-0.306277	0.739	0.728	9.83988e-30	6.21872e-34	2.75918e-49	3.92321e-49
																														CD59	5.43546e-37	-0.373943	0.921	0.939	8.60052e-33	2.33163e-49	-0.32359	0.931	0.882	3.68934e-45	5.43546e-37	4.66327e-49	6.57918e-49
																														CACYBP	2.55233e-25	-0.25672	0.991	0.981	4.03855e-21	1.20966e-48	-0.324215	0.851	0.805	1.91405e-44	2.55233e-25	2.41932e-48	3.38705e-48
																														CCT4	9.44217e-47	-0.410782	0.869	0.92	1.49404e-42	4.38604e-47	-0.335476	0.714	0.721	6.94003e-43	9.44217e-47	8.77208e-47	1.21872e-46
																														RAN	9.94058e-43	-0.31504	1	0.994	1.5729e-38	9.24075e-46	-0.251742	0.991	0.957	1.46216e-41	9.94058e-43	1.84815e-45	2.54821e-45
																														SRSF3	2.46185e-36	-0.29268	0.991	0.985	3.89539e-32	2.3943e-45	-0.284482	0.949	0.895	3.7885e-41	2.46185e-36	4.78859e-45	6.55281e-45
																														NQO1	8.06644e-44	-0.385952	0.803	0.876	1.27635e-39	1.96367e-35	-0.307143	0.658	0.659	3.10711e-31	1.96367e-35	1.61329e-43	2.19118e-43
																														DAD1	2.11429e-37	-0.310703	0.946	0.928	3.34545e-33	9.58808e-44	-0.304451	0.86	0.814	1.51712e-39	2.11429e-37	1.91762e-43	2.58523e-43
																														ARF4	3.89864e-30	-0.330131	0.744	0.827	6.16883e-26	3.43617e-43	-0.346997	0.64	0.669	5.43706e-39	3.89864e-30	6.87235e-43	9.19682e-43
																														TMEM59	1.13138e-31	-0.30139	0.932	0.931	1.79019e-27	3.86598e-43	-0.331935	0.711	0.707	6.11714e-39	1.13138e-31	7.73196e-43	1.02717e-42
																														EIF3D	1.97665e-27	-0.273508	0.91	0.917	3.12765e-23	5.79777e-43	-0.311308	0.802	0.763	9.17382e-39	1.97665e-27	1.15955e-42	1.52927e-42
																														LTF	1.84681e-07	-0.646204	0.602	0.591	0.0029222	6.08752e-43	-0.749225	0.909	0.833	9.63229e-39	1.84681e-07	1.2175e-42	1.59414e-42
																														NAPRT1	1.40539e-28	-0.288169	0.955	0.95	2.22375e-24	1.3772e-42	-0.314146	0.827	0.796	2.17915e-38	1.40539e-28	2.7544e-42	3.58073e-42
																														HLA-C	2.11546e-42	-0.39218	0.896	0.924	3.34729e-38	5.61002e-32	-0.287275	0.828	0.756	8.87673e-28	5.61002e-32	4.23091e-42	5.46118e-42
																														PDIA3	2.0095e-41	-0.407387	0.796	0.835	3.17962e-37	1.15542e-30	-0.300825	0.525	0.557	1.82821e-26	1.15542e-30	4.01899e-41	5.1511e-41
																														PDHA1	6.2395e-25	-0.273393	0.631	0.725	9.87276e-21	6.56104e-41	-0.324054	0.323	0.467	1.03815e-36	6.2395e-25	1.31221e-40	1.67008e-40
																														PSMD11	1.77545e-23	-0.264376	0.882	0.898	2.80929e-19	8.97658e-41	-0.347184	0.609	0.627	1.42036e-36	1.77545e-23	1.79532e-40	2.26908e-40
																														COPB2	1.23238e-21	-0.253533	0.423	0.556	1.95e-17	1.99843e-40	-0.341832	0.385	0.502	3.16212e-36	1.23238e-21	3.99686e-40	5.01675e-40
																														GNL3	5.94862e-25	-0.273008	0.907	0.884	9.4125e-21	3.91529e-40	-0.316148	0.733	0.713	6.19516e-36	5.94862e-25	7.83057e-40	9.7614e-40
																														THRAP3	1.36244e-39	-0.324614	0.76	0.822	2.15579e-35	3.71842e-35	-0.29844	0.568	0.605	5.88366e-31	3.71842e-35	2.72488e-39	3.37366e-39
																														MRPL3	1.744e-39	-0.340983	0.88	0.897	2.75954e-35	4.89699e-34	-0.289446	0.687	0.683	7.74851e-30	4.89699e-34	3.48801e-39	4.28931e-39
																														VCP	6.63837e-37	-0.409953	0.633	0.73	1.05039e-32	2.48868e-39	-0.336384	0.545	0.598	3.93784e-35	6.63837e-37	4.97737e-39	6.07974e-39
																														GTPBP4	4.49078e-22	-0.27131	0.756	0.79	7.10576e-18	6.30174e-39	-0.328948	0.565	0.609	9.97124e-35	4.49078e-22	1.26035e-38	1.52922e-38
																														RSL1D1	7.87376e-33	-0.322796	0.975	0.962	1.24586e-28	3.09722e-38	-0.276328	0.869	0.818	4.90074e-34	7.87376e-33	6.19445e-38	7.46616e-38
																														ATP5C1	7.53182e-31	-0.278469	0.966	0.975	1.19176e-26	6.68859e-38	-0.270253	0.856	0.812	1.05834e-33	7.53182e-31	1.33772e-37	1.60174e-37
																														LDHA	1.3205e-19	-0.300154	0.993	0.994	2.08942e-15	1.24269e-37	-0.291089	0.96	0.906	1.96632e-33	1.3205e-19	2.48539e-37	2.95648e-37
																														MORF4L2	5.2985e-24	-0.290074	0.955	0.948	8.38382e-20	2.40583e-37	-0.310664	0.638	0.656	3.80675e-33	5.2985e-24	4.81166e-37	5.68651e-37
																														ECH1	3.74273e-36	-0.319803	0.799	0.862	5.92212e-32	2.8952e-30	-0.290962	0.616	0.619	4.58108e-26	2.8952e-30	7.48546e-36	8.78938e-36
																														GSTO1	5.36183e-26	-0.253315	0.819	0.841	8.48402e-22	4.41276e-36	-0.303387	0.596	0.62	6.98231e-32	5.36183e-26	8.82552e-36	1.02964e-35
																														DYNC1I2	1.1876e-18	-0.250637	0.862	0.848	1.87914e-14	6.21327e-36	-0.271436	0.911	0.842	9.83126e-32	1.1876e-18	1.24265e-35	1.44053e-35
																														DDOST	8.77327e-21	-0.251329	0.842	0.854	1.38819e-16	2.10251e-35	-0.301264	0.632	0.633	3.3268e-31	8.77327e-21	4.20501e-35	4.84375e-35
																														IMPDH2	2.5957e-35	-0.357127	0.925	0.933	4.10717e-31	1.32752e-28	-0.267198	0.786	0.729	2.10053e-24	1.32752e-28	5.19139e-35	5.94235e-35
																														HSPA9	5.97397e-35	-0.347177	0.774	0.831	9.45261e-31	3.55529e-28	-0.285421	0.57	0.591	5.62554e-24	3.55529e-28	1.19479e-34	1.35908e-34
																														BCLAF1	4.73566e-26	-0.273019	0.839	0.877	7.49323e-22	7.50262e-35	-0.308247	0.731	0.706	1.18714e-30	4.73566e-26	1.50052e-34	1.69624e-34
																														CLDN7	5.92234e-25	-0.252385	0.991	0.974	9.37092e-21	8.34888e-35	-0.28256	0.846	0.785	1.32104e-30	5.92234e-25	1.66978e-34	1.87592e-34
																														TACSTD2	1.03944e-34	-0.406512	0.959	0.967	1.6447e-30	8.89491e-34	-0.300808	0.889	0.821	1.40744e-29	8.89491e-34	2.07887e-34	2.3212e-34
																														ACTL6A	7.44071e-24	-0.256595	0.613	0.687	1.17734e-19	4.17291e-33	-0.292739	0.437	0.515	6.60279e-29	7.44071e-24	8.34582e-33	9.26182e-33
																														NIT2	2.25031e-31	-0.303006	0.862	0.892	3.56067e-27	5.90108e-33	-0.30144	0.678	0.657	9.33727e-29	2.25031e-31	1.18022e-32	1.30181e-32
																														HSP90B1	5.79089e-29	-0.408263	0.683	0.755	9.16292e-25	6.11157e-33	-0.329412	0.519	0.568	9.67033e-29	5.79089e-29	1.22231e-32	1.34013e-32
																														U2AF1	1.91665e-32	-0.275837	0.989	0.977	3.03272e-28	3.59455e-30	-0.259657	0.817	0.759	5.68765e-26	3.59455e-30	3.8333e-32	4.17761e-32
																														PCMT1	3.49555e-32	-0.312938	0.631	0.748	5.53101e-28	4.43034e-23	-0.253113	0.468	0.509	7.01013e-19	4.43034e-23	6.9911e-32	7.57369e-32
																														AHSA1	4.56023e-23	-0.256668	0.808	0.827	7.21566e-19	1.10897e-31	-0.287205	0.43	0.52	1.75473e-27	4.56023e-23	2.21795e-31	2.38856e-31
																														NOP58	3.99361e-20	-0.262824	0.74	0.755	6.3191e-16	1.33809e-31	-0.301933	0.579	0.599	2.11726e-27	3.99361e-20	2.67618e-31	2.86509e-31
																														ANP32A	4.6005e-28	-0.28006	0.819	0.836	7.27938e-24	4.18546e-30	-0.265994	0.782	0.708	6.62265e-26	4.6005e-28	8.37091e-30	8.90939e-30
																														PSMC1	6.32286e-29	-0.315258	0.808	0.839	1.00047e-24	7.50131e-27	-0.27076	0.602	0.608	1.18693e-22	7.50131e-27	1.26457e-28	1.33809e-28
																														DDX39A	6.66034e-26	-0.33563	0.946	0.93	1.05387e-21	1.63439e-27	-0.312407	0.664	0.654	2.5861e-23	6.66034e-26	3.26878e-27	3.43883e-27
																														SFN	1.14536e-25	-0.333508	0.842	0.85	1.81231e-21	6.3299e-18	-0.272256	0.733	0.647	1.00158e-13	6.3299e-18	2.29072e-25	2.39605e-25
																														GSTM3	3.34992e-25	-0.287184	0.794	0.828	5.30057e-21	3.64308e-24	-0.274548	0.499	0.538	5.76445e-20	3.64308e-24	6.69983e-25	6.96782e-25
																														DKC1	3.19515e-24	-0.27562	0.765	0.79	5.05569e-20	3.94083e-25	-0.280161	0.544	0.557	6.23557e-21	3.19515e-24	7.88166e-25	8.15035e-25
																														ANXA5	3.70165e-24	-0.258514	0.516	0.625	5.85713e-20	6.30193e-19	-0.259547	0.533	0.528	9.97155e-15	6.30193e-19	7.40331e-24	7.61244e-24
																														ATP1B3	6.02433e-16	-0.251872	0.91	0.891	9.53229e-12	7.86137e-24	-0.268714	0.816	0.747	1.24391e-19	6.02433e-16	1.57227e-23	1.60761e-23
																														LGALS3BP	2.75948e-23	-0.290081	0.561	0.65	4.36633e-19	1.00914e-21	-0.25219	0.556	0.549	1.59676e-17	1.00914e-21	5.51897e-23	5.61146e-23
																														MCM7	7.15954e-20	-0.297709	0.649	0.703	1.13285e-15	6.90355e-15	-0.252044	0.657	0.59	1.09235e-10	6.90355e-15	1.43191e-19	1.44782e-19
																														HLA-A	5.52812e-18	-0.272827	0.523	0.613	8.74715e-14	1.63503e-16	-0.258124	0.453	0.47	2.58711e-12	1.63503e-16	1.10562e-17	1.11173e-17
																														KPNA2	9.80488e-09	-0.259259	0.5	0.545	0.000155143	2.19786e-05	-0.287798	0.518	0.473	0.347768	2.19786e-05	1.96098e-08	1.96098e-08
[truncated: 79 more columns]
