# Supplementary material for: JAK–STAT Signaling in Inflammatory Breast Cancer Enables Chemotherapy-Resistant Cell States
Source: Oxford University Press journal article supplement (doi:10.1158/0008-5472.can-22-0423), 2022-11-21
Supplement: can-22-0423_supplementary_table_s9_suppst9.xlsx [file can-22-0423_supplementary_table_s9_suppst9.xlsx]

## Sheet: FCIBC02->Paclitaxel_Vs_Vehicle
Supplementary Table S9. List of genes differentially expressed after combination treatments.
Treatment	id	baseMean	log2FoldChange	lfcSE	stat	pvalue	padj
1e-8M Paclitaxel	IFI6	3146.2	1.87125	0.0521488	35.8829	5.64532e-282	7.00979e-278
	ISG15	2671.49	1.30104	0.05146	25.2825	4.98014e-141	3.09192e-137
	OAS3	2992.07	1.31484	0.05461	24.0769	4.36383e-128	1.80619e-124
	IFIT2	1576.38	1.36888	0.0619891	22.0826	4.64861e-108	1.44305e-104
	NES	2914.23	-1.06778	0.0487427	-21.9064	2.25969e-106	5.6117e-103
	STAT1	6470.05	0.924342	0.0425709	21.713	1.5466e-104	3.2007e-101
	DDX60	2835.94	1.1126	0.0522094	21.3104	9.09004e-101	1.61244e-97
	MX1	6843.73	1.35968	0.0651679	20.8643	1.13006e-96	1.75399e-93
	DDX58	3328.86	0.932831	0.0498185	18.7246	3.11988e-78	4.30439e-75
	IFIT3	897.167	1.27435	0.0738523	17.2554	1.01927e-66	1.26563e-63
	SAMD9	937.798	1.25474	0.0729495	17.2002	2.64711e-66	2.98811e-63
	EIF2AK2	6434.85	0.645189	0.0390094	16.5393	1.91091e-61	1.97731e-58
	IFIH1	1660.02	0.999948	0.0609787	16.3983	1.96563e-60	1.87748e-57
	IGFBP3	6972.58	-0.578652	0.0358644	-16.1345	1.46093e-58	1.29574e-55
	HELZ2	2774.06	0.796318	0.0505354	15.7576	6.08969e-56	5.04105e-53
	OAS2	490.27	1.36089	0.0878442	15.4921	3.92264e-54	3.04421e-51
	PARP9	1713.51	0.905596	0.0601382	15.0586	3.03194e-51	2.21456e-48
	HERC6	1613.38	0.987608	0.0656387	15.0461	3.66098e-51	2.52547e-48
	CMPK2	597.508	1.198	0.0820006	14.6097	2.43547e-48	1.59164e-45
	B2M	10954.7	0.465774	0.0321981	14.4659	1.98961e-47	1.23525e-44
	IFIT1	1415.73	1.29651	0.0912711	14.205	8.52899e-46	5.04307e-43
	BST2	3559.15	0.649905	0.0459395	14.147	1.94981e-45	1.10049e-42
	DTX3L	2350.26	0.72861	0.0525867	13.8554	1.18006e-43	6.37077e-41
	OAS1	599.378	1.12115	0.0827732	13.5449	8.49535e-42	4.39528e-39
	RSAD2	397.623	1.16138	0.0880005	13.1975	9.07322e-40	4.50648e-37
	PBX1	4311.09	-0.552066	0.0429143	-12.8644	7.13991e-38	3.40986e-35
	DDX60L	560.223	1.03779	0.082309	12.6085	1.89685e-36	8.72339e-34
	ANXA1	12618.9	0.43403	0.034959	12.4154	2.15594e-35	9.56083e-33
	IFIT5	834.355	0.90615	0.07398	12.2486	1.70955e-34	7.31983e-32
	IFITM3	8898.62	0.416111	0.0340742	12.2119	2.68571e-34	1.11162e-31
	RPL3	32432.6	-0.299148	0.0245713	-12.1747	4.24005e-34	1.69835e-31
	IFI44L	214.966	1.12284	0.0924185	12.1495	5.77392e-34	2.24046e-31
	PARP14	2642.51	1.00169	0.0839579	11.9309	8.16784e-33	3.07334e-30
	CD44	13503.8	0.360096	0.0308049	11.6896	1.44135e-31	5.26389e-29
	PLSCR1	3173.03	0.573934	0.0491377	11.6801	1.61075e-31	5.71448e-29
	LTBP1	2011.94	-0.649155	0.0560729	-11.577	5.39174e-31	1.8597e-28
	XAF1	312.159	1.04417	0.0905441	11.5321	9.08617e-31	3.04927e-28
	IFI44	511.123	0.979883	0.0851429	11.5087	1.19279e-30	3.89759e-28
	IFITM1	1409.3	0.721153	0.0636522	11.3296	9.36541e-30	2.9818e-27
	ADAR	21427.8	0.32463	0.0291871	11.1223	9.76709e-29	3.03195e-26
	PARP10	3232.51	0.509959	0.0465913	10.9454	6.99269e-28	2.11776e-25
	SAMHD1	2246.18	0.628494	0.0576737	10.8974	1.18597e-27	3.50623e-25
	HSPA2	13460.9	-0.314635	0.0294067	-10.6995	1.02383e-26	2.95647e-24
	TF	741.348	-0.809578	0.0760136	-10.6504	1.73545e-26	4.89752e-24
	PTPRF	52344.5	-0.273732	0.0257758	-10.6197	2.41285e-26	6.65787e-24
	SAA1	1693.1	0.642022	0.0609943	10.5259	6.56111e-26	1.77107e-23
	TFPI2	1088.2	-0.758317	0.0721437	-10.5112	7.67189e-26	2.02685e-23
	KRT5	79520.2	-0.248846	0.0236931	-10.5029	8.37528e-26	2.16658e-23
	HLA-C	5339.89	0.418007	0.039902	10.4759	1.1153e-25	2.82626e-23
	HLA-B	805.975	0.795892	0.0766942	10.3775	3.13977e-25	7.7973e-23
	HMCN1	4078.44	-0.480164	0.0464379	-10.3399	4.65015e-25	1.13217e-22
	IRF9	1506.87	0.624874	0.0608645	10.2666	9.9612e-25	2.37862e-22
	TAP2	3172.03	0.470149	0.046576	10.0942	5.85972e-24	1.37283e-21
	FBXO32	1585.59	0.596455	0.0596885	9.99279	1.63896e-23	3.76869e-21
	LGALS1	4611.78	-0.40985	0.0415377	-9.86693	5.79094e-23	1.30738e-20
	ATF3	707.389	0.759351	0.0771081	9.84787	7.00094e-23	1.55233e-20
	LTF	22000.3	0.289981	0.0300264	9.65754	4.56679e-22	9.94839e-20
	NOTCH3	50887.9	-0.285936	0.0296618	-9.63987	5.42565e-22	1.16156e-19
	FMO2	872.784	-0.704063	0.0736751	-9.55631	1.22026e-21	2.56813e-19
	OASL	1412	0.585849	0.0624332	9.38361	6.37533e-21	1.31937e-18
	GADD45A	1091.98	0.62949	0.0677056	9.29745	1.43854e-20	2.92826e-18
	IRF7	704.235	0.722664	0.077861	9.28147	1.67162e-20	3.34783e-18
	SOD2	3217	0.423096	0.0463446	9.12936	6.8907e-20	1.35812e-17
	KIRREL	7736.4	-0.321714	0.0355193	-9.05745	1.33537e-19	2.59082e-17
	FASN	18590	-0.262117	0.0290965	-9.00855	2.08805e-19	3.98882e-17
	CCL28	1727.33	-0.530475	0.0594383	-8.92481	4.46463e-19	8.3996e-17
	IFFO2	4740.75	-0.367217	0.0412965	-8.89219	5.99175e-19	1.11044e-16
	KRT19	26099.4	-0.262788	0.0299101	-8.78591	1.55107e-18	2.8323e-16
	TYMP	2358.94	0.477713	0.0549875	8.68766	3.69979e-18	6.65802e-16
	SLC3A2	4607.67	0.360945	0.0416498	8.6662	4.46794e-18	7.92548e-16
	TAP1	744.582	0.656062	0.0762612	8.60283	7.77715e-18	1.36012e-15
	CELSR2	4730.78	-0.360812	0.0424091	-8.50789	1.7712e-17	3.05458e-15
	SQSTM1	7359.51	0.293341	0.0350582	8.36725	5.89786e-17	1.0032e-14
	CYBRD1	2663.56	-0.418474	0.0500972	-8.35324	6.64155e-17	1.11443e-14
	KIT	21310.9	-0.220931	0.0264726	-8.34568	7.08068e-17	1.17228e-14
	CSF1	2199.35	0.442444	0.0531446	8.32529	8.41225e-17	1.37441e-14
	LRP1	937.335	-0.606802	0.0738447	-8.21727	2.08182e-16	3.35714e-14
	SP100	541.549	0.680622	0.08289	8.21115	2.19079e-16	3.48757e-14
	CGN	3820.64	-0.358125	0.0436349	-8.20731	2.26191e-16	3.55521e-14
	RPLP0	30616.7	-0.223179	0.0273766	-8.15219	3.57401e-16	5.54731e-14
	KLF6	6527.14	0.304678	0.0374404	8.13768	4.02939e-16	6.17691e-14
	EEF1A1	154671	-0.181998	0.0223815	-8.13166	4.23454e-16	6.41223e-14
	LZTFL1	949.77	-0.577307	0.0711041	-8.11918	4.69332e-16	7.02133e-14
	WNK2	2718.79	-0.408885	0.0503888	-8.1146	4.87385e-16	7.20459e-14
	CRABP2	5791.4	-0.312092	0.0385883	-8.08775	6.0776e-16	8.87831e-14
	PTX3	850.888	0.587952	0.0733792	8.01252	1.12382e-15	1.62261e-13
	FTH1	20530.2	0.255078	0.0319647	7.97998	1.46352e-15	2.08879e-13
	SDC1	6244.78	-0.302116	0.0382939	-7.88941	3.03609e-15	4.28399e-13
	ZC3HAV1	3639.99	0.351329	0.0445428	7.88745	3.08435e-15	4.30319e-13
	RPS6	35169.6	-0.203944	0.0259458	-7.86037	3.8299e-15	5.28399e-13
	LGALS3BP	7092.44	0.276036	0.0353435	7.8101	5.71445e-15	7.7974e-13
	HDAC9	692.566	0.616747	0.0792313	7.78413	7.01945e-15	9.47397e-13
	TRIM14	1380.18	0.497092	0.0639152	7.77736	7.40512e-15	9.88703e-13
	PARP12	1141.39	0.534509	0.0694879	7.69212	1.4472e-14	1.91169e-12
	FBLN1	1574.63	-0.473111	0.0615174	-7.69068	1.46353e-14	1.91291e-12
	SERPINA3	2260.26	-0.410329	0.0533889	-7.68567	1.52197e-14	1.96857e-12
	LAP3	1949.64	0.440041	0.0572977	7.6799	1.5921e-14	2.03805e-12
	SLC15A3	215.421	0.707049	0.0923567	7.65563	1.92369e-14	2.4374e-12
	TFRC	7695.23	0.285056	0.0372825	7.64584	2.07582e-14	2.60358e-12
	TNS3	1939.21	-0.423946	0.055501	-7.63852	2.19726e-14	2.72834e-12
	PLXND1	577.759	-0.643782	0.0849617	-7.57731	3.52782e-14	4.33712e-12
	TRIM22	277.856	0.69456	0.0919891	7.55046	4.33714e-14	5.27983e-12
	PDE4B	1526.88	0.469207	0.0631259	7.43288	1.06259e-13	1.28099e-11
	PLXNB2	9006.62	-0.248087	0.0335019	-7.40518	1.30974e-13	1.56375e-11
	CREB3L2	4260.4	-0.308491	0.0416714	-7.40295	1.3319e-13	1.57507e-11
	TGFBI	474.02	-0.62362	0.0844825	-7.38164	1.56352e-13	1.83153e-11
	APOE	515.981	-0.616011	0.0834832	-7.37886	1.59652e-13	1.85271e-11
	HSPG2	6856.5	-0.303009	0.0415677	-7.28953	3.11028e-13	3.57596e-11
	ATP13A5	613.684	-0.578218	0.0795548	-7.26818	3.64373e-13	4.15085e-11
	NPNT	1082.71	-0.488256	0.0674418	-7.23967	4.49777e-13	5.07717e-11
	RPL7A	31581.3	-0.181058	0.025134	-7.20372	5.85932e-13	6.55452e-11
	AMOT	3037.21	-0.339373	0.0473788	-7.16296	7.89519e-13	8.75309e-11
	L1CAM	1184.89	-0.469404	0.0657268	-7.14175	9.21488e-13	1.01258e-10
	TMEM63A	11232.1	-0.221826	0.0311255	-7.12684	1.02699e-12	1.11861e-10
	ERBB3	3197.24	-0.330913	0.0466134	-7.09909	1.2558e-12	1.35594e-10
	APCDD1	1312.19	-0.458095	0.0645413	-7.0977	1.26849e-12	1.35783e-10
	ABCB1	1355.31	0.467562	0.0658971	7.09533	1.29039e-12	1.36947e-10
	LDHA	14092.4	0.208181	0.0293862	7.08429	1.39758e-12	1.47066e-10
	CCL5	195.048	0.652031	0.0924142	7.05553	1.71948e-12	1.79418e-10
	HNRNPA1	16550.9	-0.201593	0.0286035	-7.04786	1.81692e-12	1.88006e-10
	LY6E	10091	0.250599	0.0356169	7.03595	1.97904e-12	2.03089e-10
	HSPA5	10207.3	0.231475	0.0329082	7.03398	2.00728e-12	2.04298e-10
	POMP	5720.88	0.26585	0.0378349	7.02658	2.11657e-12	2.1367e-10
	MT-ND5	60431.2	-0.17284	0.0246025	-7.02529	2.13628e-12	2.13921e-10
	LAMP3	192.869	0.647655	0.0923787	7.01086	2.36854e-12	2.35281e-10
	TRIM25	4264.6	0.303287	0.0435816	6.95908	3.42512e-12	3.37538e-10
	IER3	2895.76	0.345169	0.049673	6.94882	3.68343e-12	3.60135e-10
	RPL13A	33019.4	-0.179599	0.0258763	-6.94069	3.90183e-12	3.78508e-10
	KRT8	20329.2	-0.211261	0.0306476	-6.89321	5.45457e-12	5.25034e-10
	MAL2	14012.5	0.203993	0.0297272	6.86218	6.78196e-12	6.47782e-10
	TXNIP	5198	-0.272005	0.0397038	-6.85086	7.34091e-12	6.95818e-10
	PNPT1	2208.6	0.371554	0.0546245	6.80197	1.03196e-11	9.70742e-10
	EIF4B	6423.47	-0.248246	0.0366607	-6.77143	1.27512e-11	1.19047e-09
	NT5C2	5798.39	0.255856	0.0379425	6.74325	1.54885e-11	1.43523e-09
	SFRP1	6637.17	0.248501	0.0368614	6.74149	1.56775e-11	1.44198e-09
	ENC1	3829.93	-0.304141	0.0452209	-6.72566	1.74793e-11	1.59589e-09
	HERC5	633.948	0.536546	0.0798223	6.72175	1.79557e-11	1.62741e-09
	EEF2	74419.3	-0.162619	0.0242622	-6.70255	2.0482e-11	1.84293e-09
	C10orf10	2924.23	0.319762	0.0477939	6.69043	2.2251e-11	1.9877e-09
	PLCG2	1989.79	-0.372575	0.0558397	-6.67223	2.51938e-11	2.23451e-09
	FLNB	18490	-0.189985	0.0286091	-6.64071	3.12178e-11	2.74916e-09
	PYGL	1394.98	-0.410003	0.0619136	-6.62218	3.53937e-11	3.09495e-09
	SERPINH1	5119.93	0.264448	0.0402152	6.57581	4.83883e-11	4.20166e-09
	SERPINB5	2254.31	0.348534	0.0531059	6.56299	5.27394e-11	4.54767e-09
	STON1	586.032	-0.543405	0.0828206	-6.56122	5.33681e-11	4.57015e-09
	SLC44A2	11350.8	-0.204958	0.0312616	-6.55623	5.51845e-11	4.69333e-09
	SP110	247.557	0.600893	0.0921047	6.52402	6.84479e-11	5.78175e-09
	ME1	1630.13	0.393502	0.0604925	6.50496	7.7713e-11	6.52002e-09
	GPNMB	5808.67	-0.246489	0.0380131	-6.48432	8.91316e-11	7.42783e-09
	NDRG1	2097.17	0.355369	0.0550736	6.45262	1.09931e-10	9.10008e-09
	IFRD1	1567.2	0.383767	0.0599378	6.40276	1.52594e-10	1.25481e-08
	ERBB2	1986.86	-0.352663	0.0557024	-6.33121	2.43249e-10	1.98712e-08
	ITPR2	7898.15	-0.219789	0.0348314	-6.31009	2.78881e-10	2.26331e-08
	IRAK1	11839.4	0.195833	0.0312676	6.26313	3.77329e-10	3.0424e-08
	SULF2	8304.69	-0.214489	0.0342963	-6.254	4.00084e-10	3.20506e-08
	JAG1	6759.57	0.223897	0.0358183	6.25092	4.08045e-10	3.24788e-08
	ASNS	1843.06	0.351841	0.0563791	6.24064	4.35782e-10	3.44656e-08
	CHAC1	169.774	0.572275	0.0920922	6.21416	5.16001e-10	4.02967e-08
	HSPH1	8949.18	0.215237	0.0346345	6.21453	5.14782e-10	4.02967e-08
	DHCR24	10176.1	-0.201355	0.0325079	-6.19404	5.86418e-10	4.55097e-08
	KCNN4	1345.92	0.423276	0.0683707	6.1909	5.98235e-10	4.61384e-08
	GUCY1A3	8651.35	-0.205413	0.0332412	-6.17946	6.43201e-10	4.93002e-08
	RPS11	28310.4	-0.166217	0.0269404	-6.16982	6.8368e-10	5.20813e-08
	GHITM	3736.34	0.270283	0.0438347	6.16595	7.00604e-10	5.30452e-08
	APOL6	3126.03	0.292844	0.0475383	6.16018	7.26629e-10	5.46822e-08
	ETS1	883.985	0.445815	0.0723832	6.15909	7.3163e-10	5.47268e-08
	EEF1G	35042	-0.158	0.0256707	-6.15489	7.51311e-10	5.58624e-08
	ETV5	402.746	0.534085	0.086981	6.14025	8.23925e-10	6.08969e-08
	BIRC3	144.235	0.556943	0.0911323	6.11137	9.87819e-10	7.25784e-08
	PSMC4	4015.56	0.263457	0.043357	6.07646	1.22863e-09	8.97404e-08
	SREBF1	6112.69	-0.226893	0.0375029	-6.05001	1.4484e-09	1.05174e-07
	VSNL1	1554.6	0.36195	0.0599341	6.03914	1.54938e-09	1.11852e-07
	USP18	363.413	0.533427	0.0884758	6.02907	1.64902e-09	1.18357e-07
	COL5A1	1342.35	-0.388792	0.0646446	-6.01429	1.80677e-09	1.28935e-07
	SYNE2	6639.62	-0.247699	0.0412009	-6.01197	1.83284e-09	1.30048e-07
	IFI27	135.59	0.544807	0.0906791	6.00808	1.87736e-09	1.3245e-07
	NTN4	4179.32	-0.258167	0.0430994	-5.99005	2.09773e-09	1.47161e-07
	EFCAB4A	1109.84	-0.401233	0.0677403	-5.9231	3.15931e-09	2.20389e-07
	TRIB3	1583.69	0.34904	0.0594944	5.86678	4.44345e-09	3.08237e-07
	KLK10	5311.67	0.253594	0.0432745	5.86013	4.62493e-09	3.19043e-07
	IL8	60.0993	0.448222	0.0767362	5.84107	5.1867e-09	3.5574e-07
	EHF	3002.12	-0.285194	0.048833	-5.84019	5.2142e-09	3.5574e-07
	SHISA5	2606.83	0.294701	0.0504688	5.83927	5.24303e-09	3.55753e-07
	KRT4	7026.13	-0.207168	0.03553	-5.83079	5.51648e-09	3.72272e-07
	SLC7A11	483.169	0.495393	0.0854336	5.79857	6.68841e-09	4.48919e-07
	GCLM	1662.8	0.347767	0.0600491	5.79137	6.98128e-09	4.66057e-07
	TAB3	2881.91	0.302903	0.0524698	5.77291	7.79142e-09	5.17359e-07
	UBAP2L	11708.8	-0.185563	0.032219	-5.75943	8.43996e-09	5.54492e-07
	NTRK2	6176.11	-0.21726	0.0377188	-5.75999	8.4119e-09	5.54492e-07
	DAPK1	5609.85	-0.222705	0.0387126	-5.75278	8.77877e-09	5.73716e-07
	BIRC2	1450.08	0.359177	0.06258	5.73948	9.49689e-09	6.16819e-07
	TCEA3	727.228	-0.443923	0.0773553	-5.73875	9.53767e-09	6.16819e-07
	CTGF	6005.57	-0.211725	0.0370941	-5.70777	1.14464e-08	7.3263e-07
	LPGAT1	2543.54	-0.286738	0.0502356	-5.70787	1.14396e-08	7.3263e-07
	SGK1	610.557	0.464423	0.0813794	5.70688	1.15063e-08	7.32689e-07
	HAND2	842.904	-0.430579	0.0754904	-5.70376	1.17195e-08	7.42453e-07
	RPS18	23824.4	-0.165208	0.0289736	-5.70203	1.18389e-08	7.46209e-07
	PTPRS	4232.22	-0.246379	0.0432475	-5.69694	1.21975e-08	7.64933e-07
	GOLGA2	3929.46	-0.245347	0.0430927	-5.69347	1.24485e-08	7.7675e-07
	DCUN1D5	1413.45	0.356093	0.0626409	5.68467	1.31067e-08	8.13727e-07
	PSAT1	5664.42	0.217233	0.0382743	5.67569	1.3813e-08	8.53311e-07
	CAD	8173.52	-0.193274	0.0341277	-5.66326	1.48527e-08	9.13e-07
	LEPREL1	1658.01	0.332143	0.0587915	5.6495	1.60914e-08	9.84271e-07
	FRAS1	1558.46	-0.341173	0.0606582	-5.62451	1.86031e-08	1.13233e-06
	KRT23	2957.45	0.272827	0.0487096	5.6011	2.12993e-08	1.29011e-06
	HSH2D	170.329	0.512286	0.0918371	5.5782	2.43016e-08	1.46482e-06
	DHRS3	1061.54	-0.382193	0.0685389	-5.5763	2.45686e-08	1.47376e-06
	DDX21	10458.2	0.183279	0.0329317	5.56542	2.61525e-08	1.56123e-06
	LAMB1	2618.68	-0.277042	0.0499592	-5.54536	2.93344e-08	1.7345e-06
	SOAT1	1424.32	0.342224	0.0617091	5.54576	2.92686e-08	1.7345e-06
	SMTN	1728.54	-0.320957	0.0579105	-5.5423	2.98526e-08	1.75678e-06
	PSMB4	9523.86	0.17851	0.0322308	5.53849	3.05086e-08	1.78691e-06
	ZFHX4	1329.42	-0.358459	0.0648065	-5.53123	3.17995e-08	1.85378e-06
	MGST1	7903.39	0.201398	0.0364781	5.52108	3.36932e-08	1.95362e-06
	PMP22	3123.13	-0.265681	0.0481273	-5.52038	3.3827e-08	1.95362e-06
	NEBL	2133.27	-0.294141	0.0533223	-5.51629	3.46239e-08	1.99039e-06
	AHNAK2	3919.49	-0.254093	0.0462329	-5.49594	3.88632e-08	2.2238e-06
	HES2	768.388	-0.409031	0.0747591	-5.47132	4.46695e-08	2.54432e-06
	NRP1	3582.14	-0.244681	0.0447319	-5.46994	4.50179e-08	2.55245e-06
	GAL	1581.97	0.346802	0.0634265	5.46778	4.55718e-08	2.57211e-06
	KLF4	219.285	0.504687	0.0924174	5.46096	4.73572e-08	2.66079e-06
	ZNFX1	3820.08	0.23832	0.0437561	5.44657	5.13507e-08	2.87217e-06
	PSAP	14287.2	0.15894	0.0292009	5.44301	5.23886e-08	2.91708e-06
	EIF5	6299.95	0.201577	0.0371615	5.42434	5.81703e-08	3.22456e-06
	MT-CO3	53744.4	-0.158016	0.0291357	-5.42346	5.84558e-08	3.22598e-06
	HLA-A	1318.1	0.345889	0.063819	5.41984	5.96534e-08	3.2775e-06
	MLLT6	6902.19	-0.202019	0.0372806	-5.41889	5.99699e-08	3.28038e-06
	PPIG	2506.87	-0.271738	0.0503386	-5.3982	6.73135e-08	3.66593e-06
	IGF2R	4879.48	-0.217394	0.0404263	-5.37753	7.55131e-08	4.09453e-06
	PICALM	5637.26	0.209243	0.0389777	5.36828	7.94896e-08	4.2914e-06
	GARS	7946.16	0.186309	0.0348651	5.3437	9.10663e-08	4.89511e-06
	NOTCH2	52400	-0.145237	0.0272121	-5.33724	9.43737e-08	5.05102e-06
	LBH	107.711	-0.469475	0.0881385	-5.32655	1.00093e-07	5.33416e-06
	RPL4	29585.3	-0.135891	0.0255299	-5.32282	1.02169e-07	5.4215e-06
	PTPN14	7569.88	-0.199816	0.0375525	-5.32099	1.03204e-07	5.45314e-06
	MYADM	2898.32	-0.280748	0.0527862	-5.31859	1.04577e-07	5.50225e-06
	NAB2	704.915	-0.40461	0.0768209	-5.26693	1.38724e-07	7.26807e-06
	PSMD14	3320.21	0.245465	0.0466568	5.26107	1.43223e-07	7.47226e-06
	EIF3L	12732.1	-0.158007	0.0300518	-5.25781	1.45778e-07	7.57376e-06
	CBX5	5077.53	-0.231465	0.0440418	-5.25557	1.47564e-07	7.6346e-06
	MYO10	3865.43	0.236267	0.0449705	5.25382	1.48974e-07	7.67558e-06
	EFNA1	4712.97	-0.211245	0.0403397	-5.23666	1.6351e-07	8.38968e-06
	MLLT11	515.296	0.435311	0.0832539	5.22872	1.70684e-07	8.72173e-06
	RPL10A	10292.6	-0.166187	0.0319075	-5.20838	1.90493e-07	9.69404e-06
	TMEM123	19944.6	0.146638	0.0283615	5.17031	2.33701e-07	1.18443e-05
	AXIN2	86.3529	-0.43924	0.0850839	-5.16244	2.43756e-07	1.23038e-05
	SHISA2	374.21	0.451103	0.0878224	5.13653	2.79853e-07	1.40685e-05
	MAFF	602.093	0.410959	0.0800292	5.13512	2.8197e-07	1.41178e-05
	NOP58	4949.92	0.204372	0.0398435	5.12937	2.90709e-07	1.44969e-05
	NCOR2	4096.66	-0.219129	0.0427703	-5.12338	3.00102e-07	1.49054e-05
	TPT1	13819.4	-0.150796	0.0294807	-5.11507	3.1362e-07	1.55148e-05
	RUNX3	2565.28	0.279698	0.0549048	5.09424	3.5015e-07	1.72532e-05
	R3HDM2	1444.29	-0.326831	0.064415	-5.07383	3.8988e-07	1.91349e-05
	FDPS	5868.58	-0.191626	0.0377791	-5.07226	3.93113e-07	1.92177e-05
	TJP3	1015.42	-0.350628	0.0693273	-5.05758	4.24609e-07	2.0676e-05
	MT-ND2	39647.3	0.125027	0.0247283	5.05605	4.28036e-07	2.07614e-05
	CD276	3575.55	-0.227824	0.0450956	-5.05202	4.37166e-07	2.11218e-05
	IL6R	526.257	0.415784	0.082367	5.04795	4.46587e-07	2.14933e-05
	PLEKHG3	2582.69	-0.253914	0.0506967	-5.00849	5.48592e-07	2.63006e-05
	RIMS3	3664.79	-0.222183	0.0447038	-4.97012	6.69119e-07	3.19556e-05
	TAF15	5727.35	-0.186997	0.0378297	-4.94313	7.68784e-07	3.65747e-05
	CXCL10	40.3691	0.341865	0.0692075	4.93971	7.82379e-07	3.70794e-05
	SRI	2975.92	-0.244448	0.0496336	-4.92506	8.43355e-07	3.98173e-05
	TNFAIP3	311.519	0.444008	0.0901783	4.92366	8.49383e-07	3.995e-05
	SLC1A3	509.224	0.416197	0.084666	4.91575	8.84414e-07	4.14406e-05
	AQP4	128.726	-0.444289	0.0904939	-4.9096	9.12638e-07	4.26024e-05
	SLC7A5	11152.2	0.157005	0.0319934	4.90742	9.22838e-07	4.29171e-05
	LURAP1L	818.501	-0.3646	0.0743113	-4.90639	9.27661e-07	4.29805e-05
	UBE2L6	113.248	0.437122	0.0891585	4.90275	9.45043e-07	4.34615e-05
	STX3	2190.08	0.261288	0.0532928	4.90287	9.4447e-07	4.34615e-05
	SLC24A3	88.8394	-0.419786	0.0857551	-4.89517	9.82192e-07	4.48378e-05
	FOSL1	668.715	0.380744	0.077777	4.89532	9.81459e-07	4.48378e-05
	CHD4	9951.39	-0.157033	0.0323023	-4.86136	1.16585e-06	5.30269e-05
	MYCL	1395.31	-0.31415	0.0647514	-4.85163	1.22451e-06	5.53099e-05
	BMP6	3743.31	-0.214099	0.0441299	-4.85156	1.22495e-06	5.53099e-05
	DEFB1	195.841	-0.447116	0.0923995	-4.83894	1.30533e-06	5.87258e-05
	HDAC6	1270.54	-0.311527	0.0644367	-4.83461	1.33404e-06	5.98009e-05
	AZIN1	8694.05	0.167713	0.0347025	4.83288	1.34574e-06	6.0108e-05
	PODXL	8675.82	-0.160625	0.033289	-4.82516	1.39888e-06	6.20352e-05
	TP53I11	3408.51	-0.221346	0.0458729	-4.8252	1.39863e-06	6.20352e-05
	YWHAG	21258.6	0.128755	0.0267363	4.81574	1.46659e-06	6.48064e-05
	NYNRIN	381.819	-0.423758	0.0882934	-4.79943	1.59119e-06	7.00631e-05
	S100A13	3132.13	-0.228123	0.0475549	-4.79703	1.61033e-06	7.06556e-05
	ARHGEF10L	3547.85	-0.219089	0.0457247	-4.79148	1.65554e-06	7.22361e-05
	ARHGEF19	1843.16	-0.269698	0.0562906	-4.79118	1.65799e-06	7.22361e-05
	TMEM184A	1209.51	-0.31748	0.0663125	-4.78763	1.68764e-06	7.32706e-05
	FADS2	15950.9	-0.14118	0.0295732	-4.7739	1.80692e-06	7.81761e-05
	PATL1	4052.6	0.206782	0.0433609	4.76887	1.85263e-06	7.98442e-05
	COLEC12	237.56	-0.438507	0.0919639	-4.76825	1.85834e-06	7.98442e-05
	NCSTN	3171.93	-0.221992	0.046718	-4.75175	2.01662e-06	8.63462e-05
	PLXNA1	5279.81	-0.184404	0.0388488	-4.74672	2.06745e-06	8.82185e-05
	ACO1	954.653	-0.339429	0.07154	-4.7446	2.08916e-06	8.88393e-05
	FKBP10	3708.15	-0.207876	0.0438998	-4.73524	2.18798e-06	9.27241e-05
	GPR126	1840.88	-0.268509	0.0567947	-4.72771	2.27062e-06	9.58991e-05
	CAV1	887.414	0.341874	0.0723505	4.72525	2.29829e-06	9.67386e-05
	NUCKS1	25261.4	-0.121873	0.025842	-4.71609	2.40418e-06	0.000100854
	NUP210	4913.19	-0.194994	0.0414798	-4.70094	2.58963e-06	0.000108267
	SMARCC2	3036.29	-0.221422	0.0471554	-4.69559	2.6584e-06	0.00011077
	SELENBP1	913.68	-0.334558	0.0712855	-4.69321	2.68951e-06	0.000111691
	ARHGEF2	3366.08	0.217937	0.0464541	4.69144	2.71285e-06	0.000112285
	MYO1E	1288.71	0.310974	0.0663579	4.68631	2.7817e-06	0.000114752
	ANXA7	3536.94	0.209007	0.0447689	4.66858	3.0329e-06	0.000124701
	DHX58	347.39	0.414021	0.089038	4.64994	3.32039e-06	0.00013607
	IGF1R	4060.93	-0.202376	0.0435867	-4.64308	3.43257e-06	0.000140205
	SEPN1	8327.08	-0.15966	0.0344599	-4.63322	3.60013e-06	0.000146567
	PAM	4331.72	-0.198155	0.0427823	-4.63171	3.62665e-06	0.000147164
	NDUFA4	6178.56	0.170437	0.0368265	4.62812	3.68992e-06	0.000149243
	PLAUR	326.147	0.41542	0.0898219	4.62494	3.74712e-06	0.000151065
	MAGED1	12484.8	-0.137933	0.0298794	-4.61633	3.90584e-06	0.000156954
	DMD	949.479	0.328776	0.0713829	4.60582	4.10849e-06	0.000164565
	MFI2	1612.46	-0.272101	0.0590967	-4.60434	4.13778e-06	0.000165205
	SZT2	3755.55	-0.208984	0.0454049	-4.60267	4.17117e-06	0.000166004
	S100A1	4400.03	-0.198709	0.04323	-4.59655	4.29544e-06	0.000170404
	TTYH1	1665.36	-0.288055	0.0629044	-4.57925	4.66654e-06	0.000184536
	TDRD7	750.147	0.345093	0.075429	4.57507	4.76069e-06	0.000187662
	CXCL1	378.391	0.400969	0.0878675	4.56334	5.03464e-06	0.000197833
	RPS4X	27160	-0.118226	0.0259138	-4.56227	5.06041e-06	0.000198218
	OPTN	1632.37	0.268484	0.0589063	4.55781	5.16889e-06	0.000201831
	GBP1	99.3916	0.397662	0.0873532	4.55235	5.30506e-06	0.000206498
	NDRG2	782.89	-0.357034	0.0786417	-4.54001	5.62526e-06	0.000218278
	HDLBP	11632.3	-0.150768	0.0332319	-4.53685	5.71017e-06	0.000220882
	ITPR3	4478.07	-0.195453	0.0431184	-4.53294	5.8168e-06	0.000223613
	CASK	2141.91	-0.241235	0.0532168	-4.53306	5.8134e-06	0.000223613
	AIF1L	3516.76	-0.205685	0.0454528	-4.52524	6.03277e-06	0.0002312
	RNF115	3041.83	0.21466	0.047583	4.51127	6.44393e-06	0.000246198
	MACF1	14346.1	-0.150277	0.0333384	-4.50762	6.55599e-06	0.000249711
	RELB	548.876	0.368808	0.0819823	4.49862	6.83945e-06	0.000259711
	MYOF	7768.12	0.154529	0.0344475	4.48591	7.26017e-06	0.000274846
	BTBD2	3032.57	-0.213114	0.0475356	-4.48324	7.35178e-06	0.000277468
	HSPB8	930.569	0.322208	0.0720518	4.47189	7.75308e-06	0.000291727
	TARS	4275.63	0.189269	0.0423559	4.46853	7.87576e-06	0.000295448
	RPS14	15746.7	-0.129706	0.0291667	-4.44706	8.70545e-06	0.000325589
	DCAF8	4924.35	-0.180651	0.0406936	-4.4393	9.02523e-06	0.000336535
	UCHL1	7442.3	0.165223	0.0372376	4.437	9.12206e-06	0.000339128
	RHOBTB3	280.453	-0.405791	0.0915556	-4.43218	9.32862e-06	0.000345771
	TRIM21	280.407	0.403395	0.0910758	4.42922	9.45725e-06	0.000349496
	SFN	3437.72	-0.201997	0.0456151	-4.42829	9.49833e-06	0.000349973
	EIF1	6608.82	0.163729	0.0370428	4.41999	9.87053e-06	0.000362611
	KIAA1324	155.687	-0.405983	0.0918833	-4.41847	9.94037e-06	0.000364099
	RPL31	23432.1	-0.121262	0.0274727	-4.4139	1.01527e-05	0.000370782
	GATA6	249.913	0.403064	0.0916861	4.39613	1.10199e-05	0.000401272
	VTCN1	1965.59	-0.243821	0.0555064	-4.39267	1.11967e-05	0.000406518
	PPP1R14B	2943.4	0.226464	0.0516025	4.38863	1.14068e-05	0.00041294
	DDIT3	253.362	0.401968	0.0916182	4.38743	1.14697e-05	0.000414008
	SERF2	7904.14	-0.153886	0.0350964	-4.38467	1.16163e-05	0.000418084
	TRANK1	126.309	0.394847	0.0901852	4.37818	1.19676e-05	0.000429483
	SPAG9	2791.12	0.215785	0.0494544	4.36331	1.28109e-05	0.000458424
	NFKB2	1166.86	0.288405	0.0661271	4.36137	1.29249e-05	0.000461172
	PRRC2B	10342.9	-0.142535	0.0327023	-4.35856	1.3092e-05	0.000465796
	PHYHD1	165.465	-0.398969	0.091641	-4.35361	1.33914e-05	0.00047509
	ANKRD1	2517.46	0.219861	0.0505829	4.34654	1.38303e-05	0.000489263
	PCSK1N	580.628	0.362135	0.0835099	4.33643	1.44815e-05	0.000510843
	ADD2	2907.13	0.208559	0.0481479	4.33162	1.48013e-05	0.000519174
	PSMA2	3941.98	0.188821	0.0435859	4.33215	1.47662e-05	0.000519174
	FAM114A1	1851.06	-0.249472	0.0576209	-4.32954	1.49423e-05	0.000522645
	SGSM2	1099.83	-0.293629	0.067877	-4.32589	1.51915e-05	0.000529866
	CHDH	2193.51	-0.228975	0.052961	-4.32347	1.53596e-05	0.000534228
	ANKRD52	4743.26	-0.175819	0.0406844	-4.32153	1.54948e-05	0.000537426
	SBSN	541.61	0.35408	0.0819765	4.31928	1.56538e-05	0.000541431
	TM7SF2	805.082	-0.320723	0.0742684	-4.31844	1.57136e-05	0.00054199
	SPP1	33.3229	0.278741	0.0645642	4.31726	1.57976e-05	0.000543374
	CERS4	522.127	-0.354989	0.0824162	-4.30727	1.6528e-05	0.000566929
	PYGB	3666.75	0.191549	0.0445121	4.3033	1.68272e-05	0.0005756
	RALGDS	3183.96	-0.202245	0.0470463	-4.29884	1.71693e-05	0.00058569
	MAFB	622.328	0.346353	0.0806716	4.29337	1.75985e-05	0.000598685
	RPL19	21399.7	-0.128329	0.0299248	-4.2884	1.79966e-05	0.000610556
	BLOC1S2	939.291	0.306818	0.0717471	4.27639	1.89952e-05	0.000642678
	RBP1	61.2469	-0.325055	0.0760411	-4.27473	1.91365e-05	0.0006457
	CREBZF	2313.58	0.221266	0.0520706	4.24934	2.14398e-05	0.000721458
	ZMYM3	2361.9	-0.219342	0.0516879	-4.24358	2.19979e-05	0.000738239
	TPR	10110.3	-0.135854	0.0320216	-4.24256	2.20982e-05	0.000739606
	PTPRU	102.575	-0.368144	0.0868792	-4.23742	2.261e-05	0.000754701
	PSMA4	4666.62	0.170762	0.0404599	4.22052	2.43738e-05	0.000811393
	COL18A1	7531.45	-0.260432	0.061756	-4.21711	2.47451e-05	0.000821552
	KCNC3	724.605	-0.323348	0.0766923	-4.21617	2.48481e-05	0.000822771
	EPS8L2	3368.74	-0.198269	0.047048	-4.21419	2.50673e-05	0.000827821
	CITED2	2337.61	0.221898	0.0526715	4.21286	2.52156e-05	0.00083051
	PTMA	31408.3	-0.131387	0.0312874	-4.19937	2.67663e-05	0.000879252
	HOXC12	2224.39	-0.221263	0.0527054	-4.1981	2.69158e-05	0.00088183
	PROM2	2846.83	-0.204758	0.0489942	-4.17923	2.92496e-05	0.00095577
	ZFAND5	6624.59	0.158042	0.0378813	4.17204	3.01881e-05	0.000983848
	PSMD11	5913.38	0.159326	0.0382118	4.16956	3.05189e-05	0.000992023
	KLK6	4908.82	-0.185698	0.0445519	-4.16813	3.07106e-05	0.000995649
	PALM	997.315	-0.292983	0.070355	-4.16436	3.12232e-05	0.00100963
	KIAA0247	2720.43	-0.207816	0.0501411	-4.14462	3.40374e-05	0.00109493
	MLEC	6258.79	-0.153993	0.0371529	-4.14484	3.40047e-05	0.00109493
	H6PD	2061.79	-0.226677	0.0547093	-4.1433	3.42348e-05	0.00109843
	SESN2	217.238	0.381922	0.0923876	4.1339	3.56651e-05	0.00114138
	TCP1	7243.18	0.146536	0.0354577	4.1327	3.58529e-05	0.00114443
	UBR3	8402.14	0.140463	0.0340121	4.1298	3.63073e-05	0.00115597
	BOC	185.279	-0.380329	0.0923371	-4.11892	3.80653e-05	0.00120884
	PTPRJ	1646.99	0.247038	0.060056	4.11346	3.8977e-05	0.00123464
	DNAJA1	7616.69	0.144773	0.0352348	4.10879	3.97735e-05	0.00125666
	PDDC1	1526.18	-0.25988	0.0632596	-4.10814	3.98853e-05	0.00125699
	TMSB10	16210.7	-0.129234	0.0314977	-4.10296	4.07901e-05	0.00128226
	MBOAT7	2885.47	-0.198602	0.0484268	-4.10108	4.11229e-05	0.00128945
	ECE1	3733.96	-0.179487	0.0438437	-4.09379	4.24383e-05	0.00132069
	PRKDC	39742.7	-0.10681	0.0260876	-4.09427	4.23504e-05	0.00132069
	GNB2L1	29836.2	-0.111696	0.027284	-4.09384	4.2429e-05	0.00132069
	INSIG1	1464.13	-0.253969	0.0621912	-4.08368	4.43273e-05	0.00137603
	NOV	294.519	0.371431	0.0910626	4.07885	4.52592e-05	0.00140145
	KANK1	2334.95	-0.211498	0.051924	-4.07322	4.63684e-05	0.00142973
	METTL5	3674.6	0.190864	0.0468602	4.07304	4.64025e-05	0.00142973
	VPS13D	1801.61	-0.244267	0.060105	-4.06401	4.8237e-05	0.00148257
	CD55	1263.29	0.262643	0.0646641	4.06166	4.87258e-05	0.00149311
	PRKD2	1661.95	0.241364	0.0594317	4.0612	4.88204e-05	0.00149311
	RPS8	19315.3	-0.134202	0.033063	-4.05897	4.92896e-05	0.00150376
	ISYNA1	2433.45	-0.214292	0.0528168	-4.05727	4.96499e-05	0.00151104
	TTC3	12083.7	-0.132549	0.0327529	-4.04695	5.18886e-05	0.00157531
	CD97	4456.11	0.169025	0.041778	4.04578	5.21491e-05	0.00157935
	FAM171B	441.447	-0.344393	0.0851685	-4.04366	5.26223e-05	0.00158981
	TTYH3	6381.95	-0.148146	0.0366576	-4.04133	5.31478e-05	0.00160179
	SFPQ	10295.5	-0.130474	0.032295	-4.04008	5.3434e-05	0.00160651
	ODC1	8622.98	0.14608	0.0362244	4.03263	5.51551e-05	0.00165027
	PSMA1	3640.74	0.179173	0.0444288	4.03282	5.51118e-05	0.00165027
	PVRL4	3116.42	-0.190211	0.0471973	-4.03013	5.57449e-05	0.00166391
	ADCY3	2308	-0.208589	0.0518588	-4.02224	5.76467e-05	0.00171244
	CPEB3	225.58	0.371028	0.0922388	4.02248	5.7589e-05	0.00171244
	RRP12	2762	0.203936	0.0507534	4.01817	5.86525e-05	0.00173816
	CTDSP2	2721.18	-0.198722	0.0494682	-4.01716	5.89044e-05	0.00174147
	MECP2	1810.1	-0.226992	0.0565214	-4.01603	5.91867e-05	0.00174566
	WARS	2221.51	0.228801	0.0570758	4.00871	6.10508e-05	0.00179637
	STC2	389.53	0.349085	0.0872528	4.00085	6.31154e-05	0.00185273
	ITGA4	643.174	-0.313333	0.078457	-3.99368	6.50551e-05	0.00190516
	GOLGA3	3770.75	-0.177634	0.0445031	-3.99149	6.56581e-05	0.0019183
	GCN1L1	6421.15	-0.155232	0.0390348	-3.97677	6.98586e-05	0.00203278
	KANK2	515.462	-0.329186	0.0827804	-3.97661	6.99039e-05	0.00203278
	EBNA1BP2	8287.42	0.13519	0.0340541	3.96985	7.19171e-05	0.00208644
	PTK7	2923.02	-0.189268	0.0477764	-3.96155	7.44651e-05	0.00215532
	TSPAN8	60.6916	-0.308252	0.0779366	-3.95516	7.64837e-05	0.0022086
	C6orf15	354.013	0.351578	0.0889954	3.95052	7.79826e-05	0.00224666
	VLDLR	2411.23	-0.201556	0.0510695	-3.9467	7.92365e-05	0.0022775
	RSPO1	281.21	-0.360291	0.0913244	-3.94518	7.97396e-05	0.00228667
	SCD	22476.2	-0.110787	0.0281038	-3.94205	8.07873e-05	0.00231137
	ABL2	3236.72	0.191591	0.0486198	3.94059	8.12827e-05	0.00231488
	GABRP	29075	-0.100587	0.0255224	-3.94113	8.11001e-05	0.00231488
	NFIX	20317.2	-0.110432	0.0281002	-3.92994	8.49654e-05	0.00241422
	SLC26A2	2452.94	0.207457	0.0529163	3.92047	8.83766e-05	0.00250312
	RPS13	8764.87	0.129656	0.0330743	3.92014	8.84973e-05	0.00250312
	FBL	6095.24	-0.14635	0.0374072	-3.91235	9.1403e-05	0.00257943
	YBX3	5294.7	0.153576	0.0392819	3.90959	9.24548e-05	0.00259731
	ALDH4A1	1136.97	-0.262642	0.0671749	-3.90982	9.23659e-05	0.00259731
	ORC3	2420.19	0.200614	0.0513566	3.90629	9.37255e-05	0.00262706
	IL6	27.0167	0.228655	0.0585815	3.90319	9.49332e-05	0.00265492
	PMAIP1	273.12	0.355756	0.0913191	3.89575	9.7895e-05	0.0027316
	NAV2	2340.84	-0.200901	0.0516721	-3.88799	0.000101078	0.00281409
	KRT7	27347.5	-0.118524	0.0304985	-3.88621	0.00010182	0.00282842
	TMEM2	2286.95	-0.219816	0.0565875	-3.88453	0.000102528	0.00284172
	INPP4B	239.962	-0.356931	0.0919316	-3.88257	0.000103358	0.00285835
	HLA-F	358.907	0.347689	0.0896112	3.87997	0.000104467	0.0028826
	STAT6	2639.49	-0.191905	0.0495604	-3.87214	0.000107882	0.00297022
	USP14	9462.54	0.127458	0.0329214	3.8716	0.000108123	0.00297026
	LRBA	2623.63	-0.198238	0.0512137	-3.8708	0.000108479	0.00297347
	PABPC4	18023.2	-0.106227	0.0274737	-3.86649	0.000110413	0.00301983
	LOXL2	450.765	-0.327595	0.0848514	-3.86081	0.000113014	0.00308415
	MSN	10162.7	0.122953	0.0318923	3.85525	0.000115612	0.00314815
	PPP1R15A	1809.32	0.218696	0.0567589	3.85306	0.000116649	0.00316943
	WNT7B	619.403	-0.306479	0.0795777	-3.85132	0.000117481	0.00318507
	CCDC85B	1396.39	0.254617	0.066156	3.84873	0.00011873	0.00320493
	DKK3	468.799	0.333111	0.0865418	3.84913	0.000118538	0.00320493
	PPP1R26	1257.32	-0.24936	0.0648648	-3.84431	0.000120894	0.00325627
	CAMK1D	1575.97	-0.228521	0.0595178	-3.83953	0.00012327	0.00331308
	APOL2	574.568	0.311345	0.0811346	3.83739	0.000124351	0.00333493
	PSMD2	12578.3	0.116042	0.0302938	3.83055	0.000127857	0.00342156
	LGR4	8774.14	-0.128061	0.033444	-3.82913	0.000128595	0.00343391
	TRIB2	1406.23	0.23755	0.0621331	3.82324	0.00013171	0.00350718
	ACACA	6546.97	-0.139701	0.0365434	-3.82288	0.000131904	0.00350718
	PHGDH	45857.3	-0.0911088	0.0238407	-3.82157	0.000132607	0.00351832
	RPL32	14539.5	-0.112662	0.0295249	-3.81585	0.000135716	0.00357031
	SUCO	3184.38	0.183665	0.0481264	3.81629	0.000135471	0.00357031
	PYCR2	2239.66	-0.203323	0.0532638	-3.81728	0.00013493	0.00357031
	CANX	23786.2	0.112958	0.0295997	3.81618	0.000135531	0.00357031
	CD82	2859.62	-0.188205	0.0495078	-3.80152	0.000143812	0.0037753
	GPX4	6548.71	-0.146167	0.0384674	-3.79977	0.000144832	0.00379405
	TAF1	2266.09	-0.202853	0.0534712	-3.79369	0.000148423	0.00387995
	HSPB1	7562.57	-0.139112	0.0366746	-3.79314	0.000148755	0.00388046
	PSMA3	3367.43	0.179365	0.0473473	3.78828	0.000151695	0.00394883
	ZFP36L2	3067.7	0.181395	0.0479103	3.78614	0.000153003	0.00396367
	RIPK2	1235.36	0.252769	0.0667551	3.78651	0.000152776	0.00396367
	CTTN	11244	0.119439	0.0315492	3.78579	0.000153222	0.00396367
	CRABP1	87.0724	-0.315603	0.0834219	-3.78321	0.000154819	0.00399665
	LAMB3	991.901	0.264638	0.0700662	3.77698	0.000158743	0.00408945
	CTSD	4153.47	0.163026	0.0432106	3.77283	0.000161407	0.00414089
	MUC5B	4817.7	-0.160332	0.0424936	-3.77308	0.000161245	0.00414089
	CPSF1	6502.81	-0.144545	0.0383313	-3.77094	0.000162634	0.00416377
	ALDH2	700.141	-0.288676	0.0765634	-3.77041	0.000162976	0.00416395
	RPS9	9876.27	-0.142407	0.0377828	-3.76909	0.000163846	0.00417757
	FZD8	117.117	0.337182	0.0895523	3.76519	0.000166421	0.00423454
	LGALS9	387.332	0.328452	0.0872473	3.76461	0.000166807	0.00423567
	TXN	5343.82	0.149595	0.0397622	3.76225	0.000168393	0.00426722
	AQP3	1193.78	-0.249136	0.0662649	-3.7597	0.000170116	0.0042997
	THSD4	516.065	-0.313666	0.0834367	-3.75933	0.000170367	0.0042997
	LAMC2	487.926	0.31524	0.0839281	3.75607	0.000172604	0.0043473
	SAMD9L	52.0776	0.271081	0.0723778	3.74535	0.00018014	0.00452793
	RAB11FIP1	13690.3	-0.122817	0.032813	-3.74294	0.00018188	0.00456242
	STK39	424.582	-0.322125	0.0860936	-3.74156	0.000182879	0.00456903
	LPIN1	5618.25	-0.143306	0.0383005	-3.74161	0.000182842	0.00456903
	SMAD3	3307.98	-0.176939	0.0473229	-3.73897	0.000184772	0.00460707
	PSMB2	5436.07	0.146316	0.0391497	3.73734	0.000185979	0.00462787
	CPAMD8	2087.65	-0.211775	0.0567383	-3.73248	0.000189602	0.00469918
	PPFIA1	4125.18	0.163264	0.0437368	3.73287	0.000189312	0.00469918
	HSPD1	15090.9	0.106795	0.0286255	3.73078	0.000190891	0.0047217
	EEF1B2	4967.27	-0.147751	0.039611	-3.73004	0.000191449	0.00472609
	RGS5	10201.1	-0.213564	0.0573337	-3.72492	0.000195375	0.00481343
	CRTAP	1518.11	-0.226907	0.0609881	-3.72052	0.00019881	0.00488837
	SLC50A1	2963.33	-0.184111	0.0495296	-3.71719	0.000201453	0.00494356
	PGBD5	5221.18	-0.146632	0.0394742	-3.71462	0.000203511	0.00498422
	RPSA	12101.7	0.117541	0.0316695	3.71148	0.000206054	0.00503656
	HEG1	276.458	-0.337523	0.0909784	-3.70992	0.000207323	0.00505612
	DSP	33937.9	-0.0959158	0.0258568	-3.7095	0.000207669	0.00505612
	RPS3A	7198.94	-0.137666	0.03713	-3.70768	0.00020917	0.00508272
	MAP1B	1627.04	-0.241162	0.0650552	-3.70704	0.000209699	0.0050856
	CCT2	6278.93	0.140901	0.0380262	3.70537	0.000211079	0.00510911
	CA8	3215.57	0.17388	0.0469335	3.70481	0.000211546	0.00511044
	ANXA2	33914.5	-0.0958365	0.025889	-3.70183	0.000214048	0.00516085
	C11orf82	1186.42	0.248233	0.0671039	3.69923	0.000216256	0.00520398
	FTL	14018.2	0.115798	0.0313229	3.69692	0.00021823	0.00524133
	EP400	2450.68	-0.198311	0.0536786	-3.69441	0.000220402	0.00528327
	DUSP10	205.851	0.341321	0.0924105	3.69353	0.000221162	0.00529126
	NONO	16614.2	-0.103169	0.028034	-3.68015	0.000233098	0.00555309
	ARID1A	5207.76	-0.146274	0.0397439	-3.68042	0.000232846	0.00555309
	TMC4	804.315	-0.28686	0.077956	-3.67977	0.000233447	0.00555309
	GAA	1852.58	-0.210797	0.057329	-3.67698	0.000236014	0.00560341
	CERS6	3166.28	-0.182229	0.0496496	-3.6703	0.000242262	0.00574078
	CREB3L4	1033.06	-0.253515	0.0691598	-3.66564	0.000246718	0.00583522
	KCTD15	322.501	-0.329353	0.0898857	-3.66413	0.000248181	0.00585868
	LDLR	3712.95	-0.16361	0.0446689	-3.66273	0.000249539	0.00587956
	XBP1	2392.79	0.190255	0.0519554	3.6619	0.000250356	0.00588763
	SEPT10	1757.89	-0.209309	0.0572152	-3.65827	0.000253923	0.00596023
	BLMH	1413.48	0.22572	0.0617211	3.6571	0.000255089	0.0059763
	GLA	699.56	0.280677	0.0768032	3.65449	0.000257693	0.00602594
	SSRP1	3540.91	0.16474	0.0451402	3.64952	0.000262735	0.00613229
	DACH1	136.134	-0.331542	0.0908696	-3.64854	0.000263731	0.00614399
	TMEM179B	1599.94	0.215563	0.0591116	3.64671	0.000265617	0.00617633
	XPOT	8307.68	0.134762	0.0370015	3.64206	0.000270466	0.00627735
	BCL2	424.242	-0.31238	0.0858211	-3.63989	0.00027275	0.00631853
	PSMD12	2005.04	0.199885	0.054968	3.63639	0.000276481	0.00639305
	FHL2	734.176	-0.275432	0.0758208	-3.63267	0.000280508	0.0064741
	ATP2B4	5930.38	-0.14678	0.0404585	-3.62791	0.000285723	0.00658223
	KDM2B	1861.95	-0.204335	0.0563533	-3.62597	0.000287882	0.00661968
	C1orf116	1265.19	-0.23294	0.064271	-3.62433	0.000289706	0.00664932
	STRAP	5186.9	0.147954	0.040853	3.62162	0.000292769	0.00670722
	RABGGTB	2883.94	0.173971	0.0480955	3.6172	0.000297805	0.00681003
	FAM219A	830.1	0.265274	0.0733679	3.61567	0.000299569	0.00683776
	BRWD3	1914.63	-0.206824	0.0572204	-3.61451	0.000300915	0.00684333
	KMO	68.2478	0.290633	0.0804026	3.61472	0.000300673	0.00684333
	KLHL22	374.394	-0.316268	0.0876034	-3.61022	0.000305934	0.00694475
	SND1	7218.65	-0.129583	0.0359141	-3.60814	0.000308404	0.00698805
	CUX1	2597.81	-0.182055	0.0505518	-3.60135	0.000316569	0.00715999
	COL17A1	32.9148	0.233524	0.0648737	3.59968	0.000318609	0.00719303
	IDE	2237.25	0.192976	0.053659	3.59635	0.000322719	0.00727259
	ALDH7A1	1978.31	-0.202271	0.0562666	-3.59486	0.000324561	0.00730086
	EFNA3	827.057	-0.262684	0.0732559	-3.58584	0.000335995	0.00754439
	B4GALNT1	879.902	0.260931	0.0727897	3.58472	0.000337441	0.00756318
	MT1E	38.5396	-0.246462	0.0689222	-3.57595	0.000348958	0.00780723
	MYD88	1562.09	0.213886	0.0598444	3.57404	0.000351515	0.00783619
	GTPBP4	4125.76	0.154024	0.04309	3.57448	0.000350921	0.00783619
	RPS3	35846.6	-0.107455	0.0300741	-3.57301	0.000352907	0.00785153
	C6orf62	4339.45	0.150568	0.0421454	3.57259	0.000353467	0.00785153
	PRRC2A	10554.7	-0.116023	0.0325167	-3.56811	0.00035957	0.00797283
	SEMA3F	1291.8	-0.228393	0.0640183	-3.56761	0.000360248	0.00797361
	GYLTL1B	1399.73	-0.22229	0.0624412	-3.55998	0.000370877	0.00819428
	KIAA1522	5478.73	-0.138421	0.0388957	-3.55878	0.000372583	0.00821734
	FAM208B	5784.77	0.139357	0.0391909	3.55585	0.000376756	0.00825414
	NFIB	1868.34	-0.202727	0.0570099	-3.55599	0.000376555	0.00825414
	WDR6	4683.08	-0.145242	0.0408383	-3.55652	0.000375807	0.00825414
	EPB41L1	961.19	-0.251768	0.0708059	-3.55574	0.000376911	0.00825414
	DNAJC3	572.155	0.28865	0.0811922	3.55515	0.000377768	0.00825483
	UGP2	2530.62	0.178902	0.050327	3.5548	0.000378271	0.00825483
	RBFOX2	3332.42	-0.165404	0.0466604	-3.54485	0.000392838	0.00849802
	ADAMTS15	618.123	-0.280369	0.0790819	-3.5453	0.000392173	0.00849802
	PSMC2	3531.42	0.164869	0.0465065	3.54507	0.000392504	0.00849802
	PDLIM5	3328.6	-0.175644	0.0495421	-3.54535	0.000392097	0.00849802
	NRIP1	1717.84	-0.206009	0.0580898	-3.54639	0.000390552	0.00849802
	RPS28	5417.75	-0.160497	0.0453013	-3.54287	0.000395801	0.00854725
	CCDC71L	460.807	0.299382	0.0845751	3.53984	0.000400372	0.00863093
	FOLR1	194.408	-0.327068	0.0924141	-3.53915	0.000401412	0.00863836
	ALDH3B1	370.491	-0.315549	0.0892562	-3.53531	0.000407294	0.00874976
	CYP1B1	11728.6	-0.118708	0.0335824	-3.53481	0.000408065	0.0087512
	NREP	58.2983	-0.27317	0.0772998	-3.5339	0.00040948	0.00876639
	ULK1	1323.54	-0.225261	0.0637573	-3.5331	0.000410713	0.00877767
	MOGS	2245.01	-0.186608	0.0528464	-3.53114	0.000413767	0.00882774
	TBC1D2	394.102	-0.307453	0.0872048	-3.52564	0.000422465	0.00898245
	RPL28	14175.9	-0.109959	0.0311868	-3.52582	0.00042217	0.00898245
	RPL37	11686	-0.109445	0.0310467	-3.52517	0.000423217	0.00898304
	PITRM1	4947.23	0.144822	0.041089	3.52459	0.000424133	0.00898713
	MYH10	2118.77	-0.190757	0.0541718	-3.52134	0.000429374	0.00908269
	DAK	1340.87	-0.230877	0.0655777	-3.52067	0.00043046	0.00909018
	NDUFC2	841.903	0.261396	0.0743659	3.515	0.000439749	0.00927056
	PRPS2	2958.93	-0.168525	0.047951	-3.51453	0.000440536	0.00927141
	PABPC1	86134	-0.080823	0.0230183	-3.51125	0.000446005	0.00937064
	EIF4G2	28757.3	0.0888428	0.0253151	3.50948	0.000448989	0.00941739
	SPATS2L	2956.4	0.169765	0.0484059	3.50711	0.000453002	0.00948554
	STIP1	7737.12	0.126975	0.0362218	3.50547	0.000455794	0.00952794
	CELSR1	1571.41	-0.215426	0.0614998	-3.50287	0.000460274	0.00960541
	MLTK	2523.33	-0.178303	0.0509395	-3.5003	0.00046474	0.00968235
	CALD1	9706.69	-0.128986	0.0368612	-3.49923	0.000466595	0.00970472
	PCBP2	8178.74	-0.129998	0.0371695	-3.49745	0.000469735	0.00975368
	AIFM2	1325.66	0.23294	0.0666884	3.49296	0.000477703	0.00990257
	KMT2D	3615.87	-0.255564	0.0731843	-3.49207	0.000479297	0.00991906
	EMP2	2798.36	-0.17188	0.0492836	-3.48757	0.000487439	0.0100708
	NMI	637.077	0.277177	0.0794891	3.48698	0.000488508	0.0100761
	IFI35	108.767	0.300553	0.0862251	3.48567	0.000490898	0.0101086
	TAF1D	948.816	0.245018	0.0703508	3.48281	0.000496185	0.0102006
	PTGFRN	3530.06	0.159303	0.0457569	3.4815	0.000498609	0.0102334
	SELT	1851.48	0.197268	0.0566743	3.48073	0.000500054	0.0102462
	FAT2	1884.3	-0.212066	0.0609754	-3.4779	0.000505357	0.0103377
	LASP1	6060.84	-0.129327	0.0371965	-3.47686	0.00050732	0.0103608
	VBP1	1516.18	0.211171	0.0608301	3.47149	0.000517576	0.0105529
	ASAP3	1803.78	-0.197925	0.0570642	-3.46846	0.000523448	0.0106533
	TCFL5	1052.21	-0.239014	0.0689184	-3.46807	0.000524212	0.0106533
	ELOVL6	6805.7	-0.130099	0.0375282	-3.4667	0.000526897	0.0106729
	IGSF3	2967.9	-0.169571	0.0489108	-3.46695	0.000526393	0.0106729
	OSGIN1	115.085	0.308269	0.0889562	3.46541	0.000529432	0.0107068
	PSMA5	4255.81	0.148201	0.0428069	3.46209	0.000535997	0.0108219
	GTF3A	8859.35	0.119953	0.0346655	3.46029	0.000539595	0.0108769
	NR4A1	309.582	0.311429	0.0900243	3.45939	0.000541392	0.0108954
	AKR1A1	2515.38	-0.177041	0.0512071	-3.45735	0.000545514	0.0109606
	RBM12	2863.36	-0.166833	0.0482666	-3.45649	0.000547252	0.0109778
	SCARB1	1974.69	-0.192684	0.055794	-3.4535	0.000553371	0.0110826
	CTSB	14038	-0.107584	0.0311787	-3.45057	0.000559399	0.0111853
	LYNX1	508.657	-0.286277	0.083004	-3.44895	0.000562764	0.0112345
	APAF1	594.715	-0.276071	0.0800687	-3.44793	0.000564904	0.0112591
	LPHN1	9965.67	-0.111094	0.0322514	-3.44462	0.000571857	0.0113794
	DSG3	3408.77	0.167769	0.0487847	3.43896	0.000583955	0.0116015
	MBD5	293.577	-0.310721	0.0906285	-3.42851	0.000606913	0.0120192
	ADAM15	9172.18	-0.119156	0.0347513	-3.42883	0.000606191	0.0120192
	ACSL3	4950.25	-0.139369	0.0406992	-3.42436	0.000616249	0.0121847
	RFK	1276.49	0.220939	0.064539	3.42334	0.000618563	0.012211
	PRKACB	505.67	-0.284644	0.0832383	-3.41962	0.00062708	0.0123594
	NBEAL2	3564.81	-0.158707	0.046467	-3.41549	0.000636676	0.0125287
	CUL7	1049.91	-0.234367	0.0686352	-3.41467	0.000638585	0.0125464
	MYH14	6741.03	-0.129892	0.0380486	-3.41385	0.000640523	0.0125646
	OBSCN	711.767	-0.278536	0.0817564	-3.4069	0.000657047	0.0128684
	HIBADH	1017.58	-0.234055	0.068718	-3.40602	0.000659162	0.0128895
	SEPT8	1650.79	-0.198877	0.0584103	-3.40482	0.00066208	0.0129156
	C8orf46	58.4488	0.258681	0.0759794	3.40461	0.00066258	0.0129156
	AUTS2	1782.04	-0.193594	0.0569515	-3.39927	0.000675651	0.0131498
	FDCSP	15.9864	0.164534	0.0484094	3.39881	0.000676801	0.0131515
	PRSS12	713.724	0.260864	0.0767618	3.39836	0.000677921	0.0131527
	ST5	1110.57	-0.22915	0.0674666	-3.39649	0.000682554	0.013222
	STX10	1982.14	-0.18857	0.0555317	-3.39573	0.000684467	0.0132384
	TGFA	3333.6	-0.155922	0.0459521	-3.39313	0.000690986	0.013307
	ATP6V1B2	1926.3	0.188372	0.0555173	3.39303	0.00069123	0.013307
	MARCH5	1545.75	0.206665	0.0608946	3.39382	0.000689242	0.013307
	RPL22L1	418.233	0.296054	0.0873035	3.39109	0.000696154	0.013381
	PHLDA1	449.914	0.289582	0.085479	3.38775	0.000704676	0.0135239
	NT5DC2	6509.7	-0.135267	0.039978	-3.38354	0.000715572	0.0137118
	RPL39	1129.27	0.236588	0.0700238	3.37868	0.000728354	0.0139352
	GLTSCR2	4130.75	-0.145965	0.0432156	-3.3776	0.000731226	0.0139687
	PRRC2C	21314.8	-0.093185	0.0276154	-3.37439	0.000739796	0.014089
	TRRAP	3049.04	-0.158297	0.0469056	-3.37479	0.000738711	0.014089
	CDKN2B	2016.57	-0.188059	0.0557456	-3.37353	0.000742121	0.0141117
	HMOX1	178.874	0.310909	0.0922005	3.3721	0.000745986	0.0141635
	DDX23	2513.95	-0.17373	0.0515377	-3.37092	0.000749179	0.0142024
	KHDRBS3	1518.79	0.212412	0.0630407	3.36944	0.000753201	0.0142476
	C1orf21	781.971	-0.250228	0.0742693	-3.3692	0.000753859	0.0142476
	CCT5	10169.3	0.107266	0.0318529	3.36754	0.000758419	0.0142903
	ACACB	287.093	-0.305254	0.0906449	-3.36758	0.000758318	0.0142903
	IDH2	3677.08	-0.153514	0.045595	-3.36691	0.000760145	0.0143011
	VSIG10	655.449	-0.263779	0.0783599	-3.36625	0.000761968	0.0143137
	HERC2	2643.09	-0.177448	0.0527277	-3.36536	0.000764448	0.0143386
	STEAP3	1601.95	-0.199517	0.0593038	-3.36432	0.000767336	0.0143711
	LIMA1	2695.04	-0.166554	0.049562	-3.36052	0.000777957	0.014548
	MATK	591.883	-0.274528	0.081719	-3.35941	0.000781082	0.0145845
	PSMA6	2274.27	0.180647	0.0537854	3.35866	0.000783217	0.0146024
	RPL5	20369.5	-0.090531	0.0269671	-3.35709	0.000787678	0.0146514
	RPL10	16992.4	-0.111955	0.0333506	-3.3569	0.000788202	0.0146514
	LPCAT3	868.534	-0.241855	0.0720629	-3.35616	0.000790316	0.0146687
	EPCAM	13063.8	0.103681	0.0309188	3.35332	0.000798476	0.0147908
	S100P	1237.77	0.218537	0.0651756	3.35305	0.000799276	0.0147908
	UACA	746.742	-0.25453	0.07595	-3.35128	0.000804398	0.0148634
	RBCK1	1232.71	0.225159	0.0672311	3.34903	0.000810963	0.0149624
	ETV4	219.323	0.308544	0.0922662	3.34406	0.000825617	0.0151877
	MBTPS1	3405.1	-0.151363	0.0452624	-3.34411	0.00082546	0.0151877
	KDM5B	6483.69	-0.122976	0.0367981	-3.3419	0.000832062	0.0152836
	FBXW8	653.715	-0.266825	0.0799291	-3.33827	0.000843014	0.0154619
	IRS1	2032.34	-0.185046	0.0554845	-3.33509	0.000852704	0.0156166
	MXD4	1521.32	-0.200214	0.0600691	-3.33306	0.00085897	0.0156851
	TMSB4X	8359.4	0.111851	0.0335545	3.33341	0.000857883	0.0156851
	SLC22A23	1669.22	-0.197133	0.0591647	-3.33195	0.000862411	0.0157248
	ATP5G2	2102.43	-0.179678	0.0539398	-3.33109	0.000865052	0.0157498
	LPHN2	2288.7	-0.179555	0.0539458	-3.32842	0.000873392	0.0158784
	RPL18	16819.1	-0.107347	0.0322637	-3.32719	0.000877258	0.0159253
	FSTL1	3437.85	-0.15097	0.0454127	-3.32441	0.000886059	0.0160616
	RNF187	3944.43	-0.145285	0.0437082	-3.32398	0.000887416	0.0160627
	PRR16	734.34	-0.254502	0.0766014	-3.32242	0.000892414	0.0161297
	ZNF521	982.944	-0.230439	0.0694084	-3.32004	0.000900035	0.0162438
	PPIF	2521.62	0.17461	0.0525999	3.31959	0.000901491	0.0162465
	PPM1K	549.219	0.272632	0.0822177	3.31597	0.00091324	0.0164343
	FBXO6	158.549	0.304802	0.0919672	3.31425	0.000918898	0.0165122
	ZFAND2A	320.554	0.300655	0.0907342	3.31358	0.000921095	0.0165278
	SPTB	426.208	-0.285345	0.0862111	-3.30984	0.000933478	0.0167258
	FBLN2	3567.57	-0.154746	0.0468394	-3.30375	0.000954003	0.017069
	DCTN1	6055.83	-0.12635	0.0382627	-3.30216	0.00095943	0.0171414
	NPTN	2857.92	-0.161924	0.049126	-3.2961	0.000980355	0.01749
	GREB1L	539.029	-0.269912	0.0819565	-3.29335	0.000990007	0.0176369
	SLC51A	19.2712	-0.170424	0.0517746	-3.29165	0.000996002	0.017678
	TBC1D9B	4731.36	-0.133735	0.0406276	-3.29172	0.000995752	0.017678
	INHBA	33.3279	0.213937	0.0649971	3.29149	0.000996587	0.017678
	SLFN11	1364.07	-0.207397	0.0630351	-3.29017	0.00100126	0.0177355
	NUDT3	1780.06	-0.195881	0.05955	-3.28935	0.0010042	0.0177624
	ELF3	7676.43	-0.115218	0.0350402	-3.28817	0.0010084	0.0178113
	CLTCL1	499.282	-0.273122	0.0831169	-3.28599	0.00101623	0.017924
	ST6GAL1	1145.01	-0.220392	0.0670803	-3.28549	0.00101804	0.0179305
	HSD17B12	2576.11	0.166422	0.0506682	3.28454	0.00102148	0.0179453
	MSI2	1443.81	-0.201259	0.0612765	-3.28444	0.00102185	0.0179453
	CLUL1	130.691	-0.297541	0.0906015	-3.28407	0.00102321	0.0179453
	TENC1	365.788	-0.290167	0.0883683	-3.28361	0.00102487	0.017949
	DIP2B	3233.16	-0.153835	0.0468884	-3.28087	0.00103487	0.018089
	SARS	3922.94	0.14138	0.0430955	3.28062	0.00103578	0.018089
	NFATC4	317.031	-0.295158	0.0899985	-3.27959	0.00103958	0.0181298
	NFKBIA	1406.58	0.214104	0.0653333	3.2771	0.0010488	0.0182651
	BMP5	89.6527	-0.280419	0.0855865	-3.27644	0.00105126	0.0182821
	GADD45GIP1	2888.28	0.170908	0.0521936	3.2745	0.00105848	0.0183711
	SCIN	56.1188	-0.253171	0.0773212	-3.27428	0.00105933	0.0183711
	RPL15	11793.6	-0.103912	0.0317418	-3.27366	0.00106163	0.0183852
	TACR1	109.529	-0.289101	0.0883333	-3.27284	0.00106471	0.018413
	PRDX1	15726.4	0.0928123	0.0283804	3.2703	0.00107434	0.0185536
	LPL	2159.18	0.179502	0.0549437	3.26701	0.00108691	0.0187446
	KRT12	546.854	0.270704	0.0828995	3.26544	0.00109294	0.0188224
	PHF10	719.463	-0.248495	0.0761265	-3.26424	0.00109758	0.0188762
	CDH3	5016.24	-0.128889	0.0394939	-3.26351	0.0011004	0.0188986
	CSNK1A1	6981.08	0.118995	0.0365128	3.25898	0.00111812	0.0190972
	SPNS2	508.492	0.270816	0.0830928	3.25919	0.00111729	0.0190972
	HADHB	5657.53	-0.124643	0.0382334	-3.26006	0.00111388	0.0190972
	TMX2	1073.81	0.22344	0.0685495	3.25955	0.00111591	0.0190972
	SYNM	1221.91	0.215993	0.0663776	3.254	0.00113792	0.0194088
	LPPR3	410.334	-0.282344	0.0867945	-3.25302	0.00114186	0.0194491
	RIPK4	4344.06	-0.140613	0.0432382	-3.25205	0.00114576	0.0194889
	IGFBP5	797.006	-0.248549	0.0765322	-3.24764	0.00116365	0.0197661
	SYNPO	414.554	-0.282873	0.0872524	-3.24201	0.00118692	0.0201338
	WWC3	965.506	-0.228211	0.0704733	-3.23826	0.00120263	0.0203447
	SCMH1	5756.89	-0.122289	0.0377599	-3.2386	0.00120119	0.0203447
	PET112	1126.3	-0.219332	0.0677681	-3.23651	0.00121	0.0204417
	PPIA	13609.2	-0.0958314	0.0296325	-3.234	0.00122071	0.0205945
	LAPTM4A	9362.72	-0.10634	0.0328994	-3.23229	0.00122804	0.02069
	SEPT2	7194.87	-0.117185	0.036267	-3.23116	0.00123287	0.0207433
	GPI	10995.1	0.10227	0.0316682	3.22943	0.00124037	0.0208412
	CALM3	7092.63	-0.130178	0.0403543	-3.22587	0.0012559	0.0210736
	VAV3	257.42	-0.294781	0.091438	-3.22383	0.00126487	0.0211955
	TANC1	2524.44	-0.175416	0.0544429	-3.22201	0.00127294	0.0213021
	TOM1L2	1628.9	-0.189508	0.0588413	-3.22065	0.00127898	0.0213743
	SRRM2	16971.5	-0.0934003	0.029018	-3.21871	0.00128769	0.0214705
	MAP4K4	3494.79	0.148858	0.0462494	3.2186	0.0012882	0.0214705
	NDUFB9	4621.58	0.142538	0.0443372	3.21488	0.00130501	0.0217216
	FARP1	3070.83	-0.151329	0.0471004	-3.2129	0.001314	0.0218419
	PSIP1	3167.24	-0.155169	0.0483955	-3.20626	0.00134472	0.0223227
	SLC25A3	10041.8	-0.102686	0.0320838	-3.20056	0.0013716	0.0227385
	FBXO45	1739.39	0.184598	0.0577083	3.19881	0.00137996	0.0228466
	NOLC1	8896.55	0.106485	0.0332978	3.19795	0.00138406	0.022884
	GNG12	3554.58	0.147748	0.0462486	3.19465	0.00140001	0.023117
	CREB5	65.812	0.248847	0.0779384	3.19287	0.00140868	0.0232291
	ADAMTSL4	228.101	-0.294723	0.0923452	-3.19153	0.00141519	0.0233057
	TACSTD2	13068.3	-0.10151	0.0318161	-3.19051	0.00142021	0.0233572
	HMGCS1	3551.18	-0.144013	0.0451442	-3.19006	0.00142243	0.0233629
	UBR4	9845.4	-0.118042	0.0370155	-3.18898	0.00142776	0.0234194
	CTSH	2429.19	-0.165898	0.0520381	-3.18801	0.00143255	0.023467
	EHMT2	2102.93	-0.172094	0.0540148	-3.18605	0.00144231	0.0235957
	IRS2	1755.59	0.18916	0.0594045	3.18427	0.00145121	0.0237101
	NIPSNAP1	2336.93	-0.164534	0.0516993	-3.18252	0.00146	0.0238223
	CDCA5	2103.29	0.180236	0.0568309	3.17145	0.00151682	0.0247169
	RNF14	1272.18	0.204639	0.0645879	3.16839	0.00153288	0.0249459
	HIST1H2BD	105.511	0.27974	0.0883023	3.16798	0.00153504	0.0249485
	SDC2	3884.31	-0.139213	0.0439683	-3.16621	0.0015444	0.0250677
	PRKCSH	6171.49	-0.123858	0.0391293	-3.16535	0.00154896	0.025109
	EIF2D	1143.7	-0.212353	0.0671165	-3.16394	0.00155646	0.0251805
	B4GALT5	4811.25	-0.127094	0.0401717	-3.16376	0.00155743	0.0251805
	RAB5B	2162.24	-0.170924	0.0540653	-3.16144	0.00156994	0.0253497
	CDK18	971.89	-0.221708	0.0701811	-3.15908	0.0015827	0.0255225
	RPS16	18693.9	-0.103045	0.0326586	-3.1552	0.00160387	0.0258304
	KIAA0754	1392.26	-0.195791	0.0620933	-3.15317	0.00161509	0.0259438
	HADH	1765.26	-0.180736	0.0573129	-3.15349	0.00161329	0.0259438
	BRI3BP	1919.05	-0.177299	0.056299	-3.14923	0.00163699	0.0262616
	DUSP16	1281.07	-0.202606	0.064409	-3.14563	0.00165732	0.0265193
	VDAC2	1443.65	0.197005	0.062623	3.14589	0.0016558	0.0265193
	ABTB2	310.992	0.283456	0.0901859	3.14302	0.00167213	0.0267218
	MXD1	1013.21	0.217555	0.0693025	3.13921	0.00169407	0.0270029
	TSC22D3	38.7875	0.216248	0.0688789	3.13954	0.00169213	0.0270029
	MKI67	12793.6	-0.0956069	0.0304794	-3.13677	0.00170817	0.0271928
	CYR61	1774.05	0.179518	0.057241	3.13618	0.00171164	0.027213
	PIR	628.58	0.2472	0.0788637	3.13453	0.0017213	0.0273317
	GALNT3	1078.2	-0.211667	0.0675505	-3.13347	0.00172752	0.0273954
	USMG5	1777.85	0.179002	0.0571497	3.13215	0.0017353	0.0274837
	PSMD13	4009.85	0.133792	0.0427234	3.13159	0.0017386	0.0275008
	CREB3	708.519	0.240322	0.0768662	3.1265	0.00176901	0.0279463
	LMNB2	11039.4	-0.0987391	0.0315859	-3.12605	0.00177173	0.0279537
	RPL29	8938.85	-0.111385	0.0356406	-3.12521	0.00177676	0.0279974
	ALDH3B2	235.261	-0.287424	0.092018	-3.12357	0.00178673	0.0281189
	ABCA2	2459.27	-0.170285	0.0545398	-3.12221	0.00179499	0.0282132
	CLDN8	572.08	-0.253769	0.0813939	-3.11778	0.00182216	0.028604
	NTN1	2386.5	-0.1636	0.0524911	-3.11671	0.0018288	0.028672
	SCAF11	2606.05	-0.157179	0.0504533	-3.11533	0.0018374	0.0287704
	ZSWIM8	2636.54	-0.15401	0.0494492	-3.11451	0.00184251	0.0288142
	SHROOM2	291.184	-0.282299	0.0907327	-3.11133	0.00186246	0.0290896
	SLIRP	863.934	0.227136	0.0730435	3.1096	0.00187343	0.0292189
	PTPRK	4527.31	-0.136084	0.0437725	-3.10891	0.00187781	0.0292189
	ADCY6	1679.94	-0.183896	0.0591482	-3.10907	0.00187674	0.0292189
	WDR74	1779.08	0.177967	0.0574332	3.09868	0.00194387	0.0302091
	NARS2	897.97	0.221399	0.0715176	3.09572	0.00196333	0.0304733
	ACADM	910.244	-0.220415	0.0712526	-3.09343	0.0019786	0.0306719
	VPS26A	2345.46	0.169524	0.0549015	3.08778	0.0020166	0.0311885
	SPTBN1	8862.07	-0.107558	0.0348342	-3.08773	0.00201694	0.0311885
	BOLA3	533.774	0.256285	0.0830124	3.08731	0.0020198	0.0311939
	AARD	13463	0.0905956	0.0293689	3.08474	0.0020373	0.031425
	PLS3	4675.86	0.137785	0.0446827	3.08364	0.00204487	0.0315027
	HCFC1	6768.22	-0.111917	0.0363877	-3.07568	0.0021002	0.032315
	UBQLN1	10478.4	0.0967178	0.0314576	3.07454	0.00210825	0.0323987
	NLRC5	372.508	0.269881	0.0878023	3.07373	0.002114	0.0324069
	PHTF1	932.876	0.220933	0.0718731	3.07393	0.00211256	0.0324069
	PSMC1	1013.73	0.214903	0.0699895	3.07051	0.00213693	0.0327111
	USP15	1856.12	0.174261	0.0567587	3.07021	0.00213911	0.0327111
	METTL7A	106.814	-0.27041	0.0880867	-3.06981	0.00214195	0.0327142
	PNPLA2	2379.15	-0.175161	0.0570742	-3.069	0.00214775	0.0327624
	XPO1	10561.9	0.0997545	0.032514	3.06804	0.00215465	0.0328274
	NID1	69.9142	-0.251166	0.0819	-3.06675	0.00216403	0.0329299
	MAP3K1	881.489	-0.220308	0.0718635	-3.06565	0.00217198	0.0330104
	MCL1	17593.4	-0.0862384	0.0281475	-3.06381	0.00218539	0.0331736
	ELMO1	139.364	0.279328	0.0912289	3.06183	0.00219986	0.0333524
	BIRC6	5524.28	-0.120848	0.039497	-3.05967	0.00221579	0.0335122
	TM4SF18	1071.26	0.208707	0.0682055	3.05998	0.00221354	0.0335122
	SUMF2	3327.61	-0.141131	0.0461472	-3.05828	0.00222608	0.033586
	ATP8A2	36.9251	0.202957	0.0663625	3.05831	0.00222593	0.033586
	SFMBT2	168.359	0.28131	0.0920407	3.05636	0.00224041	0.0337611
	RASSF7	766.008	-0.229326	0.0751378	-3.05208	0.00227263	0.0342051
	SEMA3C	152.225	-0.279433	0.0915734	-3.05146	0.0022773	0.0342339
	QARS	5486.26	-0.116552	0.0382296	-3.04874	0.00229805	0.0345042
	TOB2	2451.08	-0.15819	0.0519039	-3.04774	0.00230571	0.0345773
	WDR11	1574.67	-0.189534	0.0622098	-3.04669	0.00231376	0.0346562
	TRIB1	2718.68	0.14981	0.0492369	3.04263	0.00234517	0.035
	RAB3IP	1085.51	0.205623	0.0675789	3.04271	0.00234457	0.035
	SMNDC1	1134.32	0.206098	0.067731	3.04289	0.00234318	0.035
	DLX1	224.736	-0.281044	0.0924046	-3.04145	0.00235441	0.0350956
	FAM129A	1184.75	0.199447	0.0656431	3.03836	0.00237873	0.0354059
	ACTR1B	2154.78	-0.171111	0.0563221	-3.03808	0.00238092	0.0354059
	BAG2	789.232	0.225867	0.0744267	3.03476	0.00240727	0.0357549
	CLIC1	4421.65	0.13232	0.043688	3.02874	0.00245576	0.0364315
	GLTSCR1L	420.773	-0.261105	0.0863023	-3.02547	0.00248249	0.0367841
	SPRY4	106.177	0.267583	0.0885509	3.0218	0.00251275	0.0371881
	FAT1	10805.8	-0.112984	0.0374261	-3.01885	0.00253736	0.0375076
	SHANK2	3306.85	-0.145477	0.0482303	-3.0163	0.00255877	0.0377792
	SOD1	4668.02	0.12324	0.0409113	3.01237	0.00259217	0.0381926
	UNC119B	1471.25	-0.189299	0.0628423	-3.01228	0.00259293	0.0381926
	POLR2A	7442.57	-0.104486	0.0346915	-3.01186	0.00259655	0.0382007
	RERE	2658.25	-0.148289	0.0493073	-3.00745	0.00263452	0.0387134
	MAP2K3	3052.46	0.142328	0.0473494	3.00591	0.00264785	0.0388632
	CLDN3	5837.63	-0.118285	0.0393681	-3.00459	0.00265936	0.0389861
	MLLT3	503.683	-0.250509	0.0834384	-3.00232	0.00267928	0.0392319
	UBE2D3	6329.73	0.113249	0.0377425	3.00057	0.00269475	0.0393675
	ZNF395	790.862	-0.222064	0.0740075	-3.00055	0.00269488	0.0393675
	SLC11A2	1785.79	-0.174286	0.0580978	-2.99988	0.00270089	0.0394089
	GSPT1	8096.27	0.106302	0.0354473	2.99887	0.00270982	0.0394927
	KLHDC2	1024.9	-0.208868	0.0697545	-2.99433	0.00275044	0.040032
	ZNF276	533.17	-0.247525	0.082673	-2.99402	0.00275327	0.040032
	ABCB6	707.833	0.234651	0.0783983	2.99306	0.00276192	0.0401109
	NPM1	21150.8	0.080858	0.0270227	2.99223	0.00276946	0.0401734
	ERMAP	702.571	-0.230344	0.0770317	-2.99024	0.00278754	0.0403885
	SREBF2	6517.88	-0.115447	0.0386372	-2.98798	0.00280825	0.040641
	SPEN	5920.24	-0.113099	0.0378611	-2.98721	0.00281539	0.040697
	SLFN5	1075.56	0.203136	0.0680315	2.98591	0.00282736	0.0408225
	YARS	3107.72	0.140944	0.0472157	2.98512	0.00283469	0.0408437
	PDE7A	1258.26	-0.192482	0.0644823	-2.98504	0.00283541	0.0408437
	GLUD1	2906.26	0.143288	0.0480114	2.98446	0.00284076	0.0408734
	KSR2	80.4708	-0.251689	0.0843614	-2.98346	0.00285009	0.0409276
	KIAA1244	6959.45	-0.113599	0.0380777	-2.98335	0.00285112	0.0409276
	TECR	7713.24	-0.118394	0.0396978	-2.98239	0.0028601	0.0410091
	RASD2	848.446	-0.222609	0.0747594	-2.97767	0.00290445	0.041597
	CIT	1558.19	-0.177653	0.0596983	-2.97585	0.00292176	0.0417967
	GLS	10290.7	0.109134	0.0366811	2.97522	0.00292775	0.0418316
	SETD5	2864.99	-0.144394	0.0485375	-2.97489	0.00293094	0.0418316
	CCRN4L	507.429	0.247293	0.0832769	2.96953	0.0029826	0.0424713
	DYNC1H1	20637.1	-0.0986564	0.0332196	-2.96983	0.00297967	0.0424713
	PSMD3	4609.82	0.125722	0.0423661	2.96753	0.00300207	0.0426996
	KIAA0947	2289.75	0.154513	0.0520946	2.966	0.00301696	0.0428193
	TOMM40	3643.42	0.136561	0.0460502	2.96548	0.00302208	0.0428193
	YAP1	3258.98	0.14069	0.0474518	2.96491	0.00302773	0.0428193
	B4GALT1	2360.73	-0.155085	0.0523009	-2.96524	0.00302447	0.0428193
	SOX11	4395.44	0.123453	0.0416243	2.96589	0.00301808	0.0428193
	ILF3	15199.9	-0.0895439	0.0302134	-2.96371	0.00303952	0.0428883
	BLZF1	1491.36	0.183616	0.0619513	2.96387	0.00303794	0.0428883
	SAA2	183.673	0.272616	0.092075	2.9608	0.00306838	0.0432464
	PRKCD	1773.06	-0.16919	0.0571579	-2.96004	0.00307601	0.0432557
	SLC25A23	1535.94	-0.177223	0.0598705	-2.9601	0.00307534	0.0432557
	NCKAP1	29041.6	0.0796948	0.0269272	2.95964	0.00307995	0.0432621
	C1QTNF6	59.7783	-0.232392	0.0785483	-2.95859	0.00309049	0.0433612
	ANP32E	10303.8	-0.0974433	0.0329573	-2.95666	0.00310995	0.043585
	TM9SF3	6204.72	0.114873	0.0388795	2.95459	0.00313084	0.0438282
	RAI14	2495.8	0.15289	0.0518029	2.95137	0.00316364	0.0442376
	EGFR	5332.24	-0.122737	0.0416028	-2.95021	0.00317561	0.0443331
	FNBP1	3146.32	-0.139463	0.0472755	-2.95001	0.00317762	0.0443331
	TMEM214	4061.58	-0.12909	0.0438054	-2.94691	0.00320969	0.0447303
	BAZ2A	5053.45	-0.118459	0.0402175	-2.94545	0.00322485	0.0448912
	C20orf24	445.003	0.258448	0.0877658	2.94475	0.00323219	0.0448927
	TBC1D5	1745.56	-0.16916	0.057442	-2.94488	0.00323084	0.0448927
	KCTD12	360.529	-0.259839	0.0882837	-2.94323	0.00324809	0.0450632
	TMEM200A	29.0116	0.18405	0.0625671	2.94165	0.00326472	0.0452433
	ECHDC1	807.135	-0.221246	0.0752426	-2.94044	0.00327751	0.04537
	PRKRIR	1403.64	0.183452	0.0624277	2.93863	0.00329667	0.0455843
	EPT1	6201.69	-0.111832	0.0380777	-2.93694	0.00331468	0.0457713
	MNT	1084.02	-0.198947	0.0677462	-2.93665	0.00331782	0.0457713
	KRTAP2-3	23.6099	0.166036	0.0565456	2.93633	0.00332125	0.0457713
	IQCG	799.195	0.21858	0.0744745	2.93496	0.00333589	0.0459221
	IGSF9	2702.27	-0.153789	0.0524279	-2.93335	0.00335325	0.04611
	RPS21	8505.17	-0.108096	0.0368792	-2.9311	0.00337766	0.0463942
	PSMB6	1990.82	0.165997	0.056648	2.93033	0.00338601	0.0464576
	ANXA3	1876.16	-0.168933	0.0577033	-2.92761	0.00341583	0.046815
	FGF2	1125.9	0.203994	0.0697308	2.92545	0.00343959	0.0470887
	ORAI2	918.037	-0.210826	0.0720963	-2.92422	0.00345316	0.0471704
	CHD3	4676.01	-0.12381	0.0423369	-2.9244	0.00345116	0.0471704
	SPPL2A	1039.25	0.201755	0.0690456	2.92205	0.00347731	0.047398
	ACSF2	752.862	-0.221641	0.0758513	-2.92204	0.00347746	0.047398
	ATP2A2	9025.77	-0.0955758	0.0327309	-2.92004	0.00349981	0.0476504
	S100A2	5154.57	0.114077	0.0390941	2.918	0.00352281	0.0478936
	FABP5	795.226	0.217697	0.0746194	2.91743	0.00352925	0.0478936
	YME1L1	6676.4	0.105818	0.036268	2.91766	0.00352663	0.0478936
	LTBP2	687.596	-0.225025	0.077161	-2.91631	0.00354199	0.0480141
	NRIP3	405.243	0.253168	0.0868679	2.9144	0.00356372	0.048256
	PDE4DIP	3500.26	-0.133282	0.0457469	-2.91346	0.00357449	0.048349
	IGF2BP3	3468.93	-0.140245	0.0481623	-2.91191	0.00359223	0.0485361
	TRAM1	9625.73	-0.106177	0.0364705	-2.9113	0.00359926	0.0485783
	KPNA1	2943.67	0.142398	0.048967	2.90804	0.00363706	0.0490351
	DGKG	33.2034	0.190483	0.0655608	2.90545	0.0036673	0.0493892
	ATP6V0E1	2997.22	0.141738	0.048804	2.90423	0.00368156	0.049474
	TOMM20	10289.4	-0.0931566	0.0320759	-2.90425	0.00368133	0.049474
	TMPRSS3	1185.56	-0.196768	0.0677694	-2.90349	0.00369027	0.0495373
	PSMB7	4137.5	0.122535	0.0422883	2.8976	0.0037603	0.0502061
	PRRC1	3697.23	-0.134782	0.046513	-2.89773	0.00375879	0.0502061
	FAM115A	484.552	-0.243247	0.0839131	-2.89879	0.003746	0.0502061
	SEMA6B	260.711	-0.265146	0.0915051	-2.89761	0.00376022	0.0502061
	AKT1S1	2639.1	0.149367	0.0515484	2.89761	0.00376017	0.0502061
	SASH1	1883.33	-0.164544	0.0568865	-2.89249	0.00382197	0.0509747
	STK17A	500.849	0.241968	0.0836884	2.8913	0.00383652	0.0511138
	VMP1	1951.44	0.160228	0.0554248	2.89091	0.00384125	0.051122
	C22orf29	1351.33	-0.180858	0.062578	-2.89012	0.00385091	0.0511957
	CYFIP1	4259.83	-0.121277	0.0419876	-2.8884	0.00387204	0.0513714
	ZC3H7B	3438.43	-0.131664	0.0455841	-2.88837	0.00387241	0.0513714
	BUD31	1206.44	0.188749	0.0653831	2.88682	0.0038916	0.0515709
	ETHE1	433.481	-0.247437	0.0858482	-2.88227	0.00394824	0.0522102
	ACLY	7317.54	-0.101206	0.0351133	-2.88228	0.00394805	0.0522102
	RRBP1	3347.13	-0.132154	0.0459028	-2.87901	0.0039893	0.052697
	SGK223	951.737	-0.203207	0.0706034	-2.87815	0.00400017	0.0527843
	RAB30	356.761	0.254973	0.0886264	2.87694	0.00401554	0.052931
	SLC25A1	2078.8	-0.163678	0.0569247	-2.87535	0.00403585	0.0531423
	BAIAP2L2	939.81	0.205955	0.0716515	2.8744	0.00404802	0.053246
	NOP2	3018.38	0.13611	0.0473826	2.87258	0.00407134	0.0534961
	H1F0	16132.4	0.0811391	0.0282576	2.87141	0.00408643	0.053581
	PSMC6	1673.79	0.171064	0.0595683	2.87172	0.00408243	0.053581
	TATDN1	1045.97	0.195688	0.0681652	2.87079	0.00409449	0.05363
	MVD	1143.24	-0.189521	0.066069	-2.86854	0.00412374	0.0539563
	PSD4	1158.2	-0.190759	0.0665628	-2.86585	0.00415896	0.0541886
	GAS1	2839.67	-0.142826	0.0498327	-2.86611	0.00415555	0.0541886
	TMCO1	4185.12	0.129043	0.0450263	2.86594	0.00415775	0.0541886
	SCAP	2715.95	-0.140729	0.0490921	-2.86663	0.00414871	0.0541886
	PAWR	1801.47	-0.171814	0.060036	-2.86184	0.00421189	0.0548208
	UPP1	283.331	0.261312	0.0913237	2.86138	0.00421802	0.054843
	CLIC4	8224.18	0.11122	0.0389101	2.85838	0.00425807	0.0553059
	SRPRB	2397.26	0.147063	0.0514732	2.85707	0.00427569	0.0553253
	S1PR1	40.4822	0.198542	0.0694866	2.85727	0.004273	0.0553253
	MED12	2867.17	-0.137596	0.0481618	-2.85695	0.00427738	0.0553253
	MB21D2	578.62	0.23177	0.0811012	2.85779	0.00426602	0.0553253
	MEGF8	1871.03	-0.162493	0.0568987	-2.85583	0.00429247	0.0554626
	ST6GALNAC5	1632.26	0.174315	0.0610972	2.85307	0.00432989	0.055888
	FAM210A	1058.95	0.19402	0.0680293	2.852	0.00434452	0.0560186
	TRIM24	2009.99	-0.155323	0.0544851	-2.85075	0.00436166	0.0561813
	CYCS	6447.38	0.11494	0.040327	2.85019	0.00436936	0.0562222
	CEP250	1839.17	-0.160135	0.0562195	-2.84839	0.00439412	0.0564822
	PRPS1	1503.43	0.172042	0.0605027	2.84354	0.00446153	0.0571862
	MT-CO1	119717	-0.135503	0.0476544	-2.84346	0.00446271	0.0571862
	PML	1992.58	0.158309	0.0556638	2.84402	0.00445481	0.0571862
	RRM2	7372.81	0.0991161	0.0348839	2.84131	0.0044928	0.0575124
	RNASEH2C	800.574	0.210442	0.0740897	2.84036	0.00450621	0.0575655
	ATAD1	1719.68	0.165651	0.0583136	2.84069	0.00450158	0.0575655
	LLGL1	1851.15	-0.161919	0.0570296	-2.83921	0.00452247	0.0576545
	BCL9	1287.83	-0.191037	0.0672833	-2.8393	0.00452128	0.0576545
	PBXIP1	1095.99	-0.190606	0.0671489	-2.83856	0.00453173	0.0577133
	POLE3	3376.76	0.13041	0.0459568	2.83767	0.00454438	0.0578151
	SLC17A5	2366.59	-0.145709	0.0513739	-2.83625	0.0045647	0.0580051
	WBP1	561.212	-0.229652	0.0809782	-2.83597	0.00456866	0.0580051
	BTBD3	3018.5	0.134774	0.0475286	2.83564	0.0045734	0.058006
	COPA	19061.3	-0.0767419	0.0270678	-2.83517	0.00458011	0.0580318
	CDK2	1611.75	-0.173388	0.0611907	-2.83356	0.00460324	0.0582655
	BCAS2	1310.14	0.179521	0.063394	2.83183	0.00462824	0.0585223
	FOXA1	540.646	-0.233823	0.0825964	-2.83092	0.0046415	0.0586302
	KLHL23	3604.71	-0.130427	0.0460987	-2.8293	0.00466493	0.0588663
	SHOC2	1054.96	0.192336	0.0680599	2.82598	0.00471355	0.0594195
	IL1RAP	209.976	0.260951	0.0923987	2.82419	0.00474005	0.0596929
	KATNAL1	1737.99	0.162223	0.057472	2.82264	0.00476302	0.0598858
	FDFT1	1766.38	-0.163129	0.0577959	-2.8225	0.00476501	0.0598858
	PLEC	20291.7	-0.0877178	0.0310851	-2.82186	0.00477457	0.0599304
	ASF1A	915.137	0.201381	0.0713707	2.82162	0.00477821	0.0599304
	ZBTB22	356.011	-0.250163	0.0887283	-2.81942	0.00481099	0.0602806
	JUN	4989.33	0.115958	0.0411359	2.81891	0.00481874	0.0603168
	UBR5	12027.4	-0.0936434	0.033227	-2.81829	0.00482803	0.0603723
	RGL2	732.145	-0.214669	0.0761852	-2.81772	0.00483657	0.0604181
	TXNRD1	6189.04	0.106161	0.0377202	2.81442	0.00488657	0.0609814
	HIPK2	1668.85	-0.165247	0.0587702	-2.81175	0.00492722	0.061427
	ARHGAP4	250.65	-0.258109	0.0918338	-2.81061	0.00494479	0.0615842
	ALG8	1146.65	0.190988	0.067999	2.80868	0.0049745	0.0618922
	SMARCA4	8570.89	-0.0962463	0.0342767	-2.80792	0.0049862	0.0619756
	VCL	6369.52	0.102241	0.0364188	2.80736	0.00499495	0.062002
	SEMA4B	675.028	-0.223775	0.0797164	-2.80714	0.00499831	0.062002
	CKAP4	1537.66	-0.167836	0.0598199	-2.80568	0.00502103	0.0621597
	INPP5F	749.242	0.215665	0.0768635	2.80582	0.00501882	0.0621597
	PLCE1	1322.86	-0.177259	0.0631922	-2.80507	0.0050305	0.0622149
	RTN3	7447.52	0.102202	0.0364668	2.80259	0.00506938	0.0626334
	ALDOA	20447.2	0.0883271	0.031526	2.80172	0.00508311	0.0626782
	PPP1R13L	1976.37	-0.155135	0.0553692	-2.80183	0.00508138	0.0626782
	LRP5	3412.8	-0.129567	0.0462659	-2.80048	0.0051026	0.0628561
	POLE	3347.07	-0.130722	0.0467065	-2.79879	0.00512943	0.0630615
	FAM120AOS	1174	0.186134	0.0665003	2.79899	0.00512625	0.0630615
	KDM3B	3289.56	-0.130826	0.0467814	-2.79653	0.00516542	0.0634412
	ANKS6	1771	-0.163735	0.0585698	-2.79555	0.00518121	0.0635547
	C10orf35	859.469	0.208373	0.0745435	2.79532	0.0051849	0.0635547
	MMP14	2942.13	-0.136132	0.0487412	-2.79295	0.00522291	0.0639575
	C11orf31	509.766	0.231362	0.0828583	2.79227	0.00523404	0.0640307
	NME4	2547.67	-0.145519	0.0521378	-2.79105	0.00525367	0.0642075
	RELA	2595	0.140596	0.0504284	2.78804	0.00530287	0.0647451
	TONSL	3194.32	-0.138547	0.0497309	-2.78593	0.00533749	0.0649696
	GABARAPL1	1088.94	0.189014	0.0678391	2.78621	0.00533284	0.0649696
	NPEPL1	607.892	-0.224069	0.080437	-2.78564	0.00534219	0.0649696
	PSME2	1319.02	0.176353	0.0632983	2.78606	0.00533531	0.0649696
	SUN2	3584.47	-0.128061	0.0459969	-2.78412	0.0053674	0.0652123
	RB1CC1	4649.02	0.11665	0.0419228	2.7825	0.00539414	0.0654731
	BMP7	51.0483	-0.20978	0.0754099	-2.78186	0.00540479	0.0655384
	OSMR	138.012	0.253495	0.0911717	2.78042	0.00542892	0.0657667
	ARNTL2	336.741	0.251149	0.0903421	2.77998	0.0054362	0.0657907
	A2M	84.1585	0.232798	0.0837668	2.77912	0.00545059	0.0659007
	KMT2C	3984.94	-0.123466	0.0444611	-2.77695	0.00548714	0.0662449
	RPL30	25543.9	-0.0731738	0.0263519	-2.7768	0.00548973	0.0662449
	TMEM126A	335.548	0.247336	0.0891491	2.77441	0.00553022	0.0666687
	MTHFD2	7296.03	0.0974709	0.0351562	2.77251	0.00556258	0.0669937
	FASTKD1	924.077	-0.19745	0.0712701	-2.77044	0.00559807	0.0673559
	VANGL2	3550.03	-0.124014	0.0447744	-2.76976	0.0056098	0.0673664
	PC	1843.38	-0.158207	0.0571182	-2.76981	0.00560888	0.0673664
	CLPB	1585.49	0.167668	0.0605449	2.76932	0.00561729	0.0673912
	TAF3	546.982	0.225419	0.0814548	2.76741	0.00565029	0.0677216
	FOXK1	6978.84	-0.106929	0.0386822	-2.76429	0.00570471	0.0683079
	HIST1H2AC	297.157	0.25056	0.0906721	2.76336	0.00572093	0.0684362
	LTV1	860.724	0.200093	0.0724319	2.7625	0.00573614	0.0684862
	GRHPR	1177.21	-0.186628	0.0675523	-2.76272	0.00573227	0.0684862
	ANAPC5	4226.67	-0.115419	0.0417893	-2.76193	0.00574603	0.0685384
	S100A14	1329.84	-0.179012	0.0649871	-2.75458	0.00587682	0.0698301
	CD68	68.5257	0.221562	0.0804138	2.75527	0.00586429	0.0698301
	MTMR2	1257.71	0.177042	0.0642716	2.75459	0.00587652	0.0698301
	DNAJB6	3459.76	0.12599	0.0457297	2.75511	0.00586727	0.0698301
	CPVL	265.683	0.251614	0.0914224	2.75222	0.00591934	0.0702009
	KRT17	73.1	0.227743	0.0827401	2.75251	0.00591408	0.0702009
	ARPC1B	3283.24	-0.136217	0.049528	-2.75029	0.00595422	0.0705473
	SMC3	3716.56	0.124709	0.0453954	2.74717	0.00601117	0.0711541
	SNRNP200	18072	-0.0754022	0.0274582	-2.74608	0.00603127	0.0712562
	UNC93B1	2744.43	0.136806	0.0498137	2.74635	0.00602619	0.0712562
	NUP188	5799.71	-0.105275	0.0383452	-2.74544	0.00604293	0.0713219
	BTAF1	1758.93	0.162626	0.059241	2.74515	0.00604832	0.0713219
	AMD1	6192.23	0.106217	0.0387168	2.74343	0.00608016	0.0716293
	STAT2	848.478	0.200564	0.0731587	2.74149	0.00611609	0.0719844
	EED	1060.06	0.188946	0.0689505	2.74031	0.00613821	0.0721762
	TINAGL1	1050.71	-0.18694	0.0682353	-2.73964	0.00615057	0.0722532
	SMIM22	130.316	-0.248569	0.0907825	-2.73807	0.00618017	0.0725323
	SET	16674.9	0.0764011	0.0279136	2.73706	0.00619913	0.0726861
	HSPA8	30241.4	0.0703663	0.0257287	2.73494	0.00623924	0.0730874
	SNX1	1597.02	-0.162467	0.059416	-2.7344	0.00624948	0.0731384
	HK1	4078.45	0.118693	0.0434157	2.73388	0.00625935	0.0731849
	AGPAT9	144.599	0.24986	0.0914523	2.73213	0.00629254	0.0735037
	ACVR1B	708.041	-0.208727	0.076433	-2.73084	0.00631727	0.0737233
	CRIM1	5568.58	-0.105874	0.0388393	-2.72595	0.00641175	0.0746854
	NACA	9775.66	-0.0892116	0.0327265	-2.72598	0.00641113	0.0746854
	SPTAN1	15043.5	-0.0790642	0.0290244	-2.72406	0.0064484	0.075042
	CALCB	111.139	0.242363	0.0890186	2.72261	0.00647678	0.0753016
	COPG1	7967.57	-0.094599	0.0347577	-2.72167	0.00649528	0.0754407
	SEMA4C	1828.73	-0.160836	0.0591008	-2.72139	0.00650089	0.0754407
	VEGFA	718.028	0.207122	0.0761305	2.72062	0.00651589	0.0754759
	ITGAV	3758.14	-0.123699	0.0454724	-2.72031	0.00652216	0.0754759
	EIF5B	7500.88	0.0965667	0.0354958	2.72051	0.0065182	0.0754759
	KMT2A	8750.57	-0.10211	0.03755	-2.71931	0.0065418	0.0756327
	SBDS	2131.75	0.149195	0.0548841	2.71837	0.00656048	0.0757781
	ASXL1	4863.17	-0.110628	0.0407027	-2.71795	0.00656878	0.0758035
	PIAS3	1732.72	-0.156053	0.0574296	-2.71729	0.00658191	0.0758845
	RARRES3	333.385	0.242627	0.0893355	2.71591	0.00660942	0.0761309
	PTS	611.187	0.220399	0.0811603	2.7156	0.0066156	0.0761315
	TBK1	1259.24	0.181465	0.0669092	2.71211	0.00668555	0.0768653
	PRDX2	11634.5	-0.0882666	0.0325603	-2.71087	0.00671074	0.0770835
	MCCC1	1212.25	-0.176534	0.0651409	-2.71004	0.00672753	0.0771569
	ACER3	310.741	0.244257	0.0901337	2.70994	0.00672956	0.0771569
	LARS	7553.75	0.0936486	0.034597	2.70684	0.00679275	0.0778096
	CCDC47	4071.17	0.11796	0.0435943	2.70585	0.00681288	0.0779682
	ETF1	4645.31	0.109494	0.040483	2.70469	0.0068368	0.078098
	GPATCH4	1949.51	0.149484	0.0552637	2.70493	0.0068319	0.078098
	ARL6IP4	1628.72	-0.158554	0.0587103	-2.70062	0.00692108	0.0789881
	GTF2I	8214.1	-0.096463	0.0357333	-2.69953	0.0069438	0.0791747
	RBM39	5227.81	0.10822	0.0401084	2.6982	0.00697159	0.0793458
	SERPINB7	25.1835	0.158184	0.0586207	2.69844	0.00696662	0.0793458
	SEC61A1	11904.1	-0.0816992	0.0302984	-2.69648	0.00700758	0.0795367
	SERPINE2	179.391	0.249063	0.092359	2.69668	0.00700342	0.0795367
	STS	1042.79	-0.185387	0.0687437	-2.69678	0.00700134	0.0795367
	NDUFA10	1100.56	-0.182111	0.0675916	-2.69428	0.0070541	0.0799916
	GM2A	307.154	-0.242113	0.0899481	-2.69169	0.00710899	0.0804904
	RBM18	1156.9	0.182417	0.0677728	2.6916	0.00711105	0.0804904
	BCAM	430.314	-0.231293	0.0859427	-2.69124	0.00711862	0.0805027
	TEAD2	2774.04	-0.133503	0.0496309	-2.68992	0.00714688	0.0807487
	PRR15L	865.661	-0.196978	0.0733287	-2.68623	0.00722632	0.081572
	ATHL1	774.919	-0.208534	0.0776482	-2.68563	0.00723931	0.0816445
	CRAT	367.519	-0.236171	0.0879744	-2.68454	0.0072629	0.0817619
	GFOD1	704.974	-0.207598	0.077326	-2.68471	0.00725933	0.0817619
	PTOV1	2468.63	-0.140311	0.0523244	-2.68156	0.00732801	0.0823456
	HIST1H4H	93.775	0.232533	0.0867126	2.68166	0.00732587	0.0823456
	ROBO1	3813.18	-0.1191	0.0445214	-2.67512	0.00747023	0.0838679
	CDC42BPA	4005.58	-0.113997	0.0426484	-2.67296	0.00751855	0.0843341
	GNL3L	1682.7	0.160351	0.0600319	2.6711	0.00756042	0.0847272
	ADD3	388.329	-0.232791	0.0871893	-2.66994	0.0075864	0.0848651
	RFX3	274.835	-0.245342	0.0918901	-2.66995	0.00758624	0.0848651
	DNAJC2	1549.69	0.160196	0.0600788	2.66643	0.0076661	0.0856796
	FZD6	3803.77	-0.116282	0.0436245	-2.66553	0.00768673	0.0858329
	TM4SF19	95.7427	0.230013	0.0863151	2.66481	0.00770318	0.0859393
	AKT1	4843.8	-0.113268	0.0425535	-2.66178	0.00777276	0.0866376
	ATXN2	1411.33	-0.16489	0.061972	-2.66072	0.00779729	0.0868331
	KIF21A	1688.31	0.157929	0.0593691	2.66012	0.00781126	0.0869108
	HNRNPA0	6433.89	-0.10175	0.0382637	-2.65918	0.00783305	0.0870752
	MDK	2713.16	-0.13907	0.0523116	-2.65849	0.00784928	0.0871776
	MDN1	2886.53	-0.13808	0.0519691	-2.65696	0.00788495	0.0874954
	JPH2	1026.09	-0.186095	0.0700665	-2.65598	0.00790775	0.0876701
	VPS13C	1076.25	-0.180725	0.0681454	-2.65204	0.00800061	0.0885863
	CRIP1	1970.47	-0.15471	0.0583398	-2.65187	0.00800466	0.0885863
	PHF15	179.22	-0.24482	0.0923563	-2.65082	0.0080296	0.0887042
	CCDC86	2222.28	0.143614	0.0541765	2.65086	0.00802871	0.0887042
	LEPRE1	1199.94	-0.173166	0.0653721	-2.64892	0.00807484	0.0891247
	IFT140	738.336	-0.202855	0.0766034	-2.64812	0.00809415	0.0892585
	DCAF6	4080.25	-0.113769	0.0429776	-2.64717	0.00811679	0.0894287
	ABCE1	3883.88	0.115271	0.0435554	2.64654	0.00813207	0.0895177
	MFSD1	1852.53	0.149219	0.0564335	2.64416	0.00818935	0.0899091
	SNTB1	93.7625	-0.227974	0.086202	-2.64465	0.00817748	0.0899091
	CCNJ	982.815	0.185451	0.0701351	2.64419	0.00818858	0.0899091
	EMG1	879.964	0.199009	0.0754012	2.63934	0.0083067	0.0911169
	SETDB1	2089.41	-0.145039	0.0549735	-2.63835	0.00833102	0.0912225
	DNTTIP2	1838.5	0.158364	0.0600186	2.63858	0.00832538	0.0912225
	ERP44	1368.51	0.164422	0.0623791	2.63584	0.00839282	0.0916566
	ADAMTS13	200.09	-0.243606	0.0924183	-2.6359	0.00839135	0.0916566
	NR4A3	43.6547	0.188262	0.071408	2.63642	0.00837859	0.0916566
	RAD23B	8236.89	0.0886679	0.0336857	2.63221	0.00848321	0.0924811
	PERP	19374.6	0.0718972	0.0273132	2.63233	0.00848018	0.0924811
	LONP1	2121.42	-0.144741	0.0550355	-2.62996	0.00853953	0.0930134
	TERF2IP	963.255	0.18481	0.0703009	2.62884	0.00856757	0.0932081
	PCMT1	2052.08	0.149389	0.0568311	2.62865	0.00857241	0.0932081
	SEMA6C	538.808	-0.218428	0.0831593	-2.62662	0.00862365	0.0936831
	DNAJC9	1280.38	0.171158	0.0651955	2.62531	0.00865696	0.0939628
	PTP4A1	3805.15	0.114766	0.0438046	2.61996	0.00879396	0.0953665
	PUM1	4321.47	-0.110249	0.042095	-2.61905	0.00881743	0.0955376
	SNX16	1291.61	0.17328	0.066226	2.61649	0.00888385	0.0961733
	PDCD10	1358.43	0.163667	0.0625738	2.61559	0.00890739	0.0963441
	ISLR	48.7117	-0.194192	0.0744017	-2.61004	0.00905307	0.0978346
	TRERF1	93.2967	-0.226225	0.0866874	-2.60966	0.00906312	0.0978581
	NLGN2	789.524	-0.205314	0.0786938	-2.60902	0.00908007	0.0979559
	PAK1IP1	731.21	0.2	0.0766694	2.60861	0.00909117	0.0979905
	TNFRSF21	2839.66	-0.126202	0.048389	-2.60807	0.00910552	0.0980601
	ZBTB7B	4001.57	-0.122974	0.0471916	-2.60586	0.00916449	0.0985687
	GPCPD1	421.908	0.22524	0.0864413	2.6057	0.00916863	0.0985687
	ZNF76	703.779	-0.203183	0.0779861	-2.60537	0.00917745	0.0985782
	NAMPT	1418.84	0.162653	0.0624523	2.60444	0.00920235	0.0985973
	CAND1	6645.27	0.0986398	0.037874	2.60442	0.00920305	0.0985973
	CLDN7	5848.46	-0.10169	0.0390379	-2.60489	0.0091903	0.0985973
	ZNF469	2780.9	-0.127536	0.0489786	-2.60391	0.00921663	0.0986576
	ANXA11	5224.08	0.104179	0.0400242	2.6029	0.00924376	0.0987778
	STARD10	963.531	0.184805	0.0709989	2.60293	0.00924316	0.0987778
	ADAMTS16	1576.44	-0.154709	0.0594669	-2.6016	0.00927902	0.0990693
	LRRN2	747.601	-0.200417	0.0771032	-2.59934	0.00934043	0.0994753
	GRAMD1A	2440.14	-0.138594	0.0533193	-2.59931	0.00934108	0.0994753
	TNRC18	6658.82	-0.100173	0.0385316	-2.59977	0.00932868	0.0994753
	RGL1	166.537	-0.237408	0.0913794	-2.59805	0.00937556	0.0996164
	ANAPC7	1880.47	-0.145281	0.0559102	-2.59847	0.00936395	0.0996164
	NXF1	2413.03	0.134108	0.0516208	2.59794	0.00937839	0.0996164
	PAPSS1	4707.86	-0.106553	0.0410249	-2.59728	0.00939644	0.0997227
	RSL24D1	2459.36	0.134121	0.0516822	2.59512	0.00945591	0.100268
	PLCB1	440.636	0.228417	0.0880978	2.59277	0.0095206	0.100868
	ATP6V1B1	350.724	-0.22999	0.0887682	-2.5909	0.00957243	0.101244
	CEP55	3489.31	0.115957	0.0447544	2.59095	0.00957104	0.101244
	NOC3L	956.211	0.184374	0.0712214	2.58875	0.00963263	0.101794
	SUDS3	1909.91	-0.145481	0.0562339	-2.58706	0.00967986	0.102196
	RAP2C	830.976	0.19416	0.0750578	2.5868	0.00968713	0.102196
	RPL18A	9090.54	-0.0924264	0.0357419	-2.58594	0.00971133	0.102365
	CXCR4	26.6538	0.151789	0.0587116	2.58533	0.00972859	0.102442
	MAN1B1	1878.16	-0.148161	0.0573134	-2.5851	0.00973518	0.102442
	SH3BGRL3	5138.14	0.102248	0.0395645	2.58432	0.009757	0.102585
	C16orf72	1333.71	0.16398	0.0634749	2.58339	0.00978352	0.102726
	PAIP2B	184.389	-0.238441	0.0923023	-2.58327	0.00978696	0.102726
	CEBPG	1831.86	0.146623	0.0569334	2.57533	0.0100144	0.105024
	TSNARE1	601.016	-0.208863	0.08117	-2.57315	0.0100777	0.105599
	DCAF7	3780.03	-0.11272	0.0438332	-2.57157	0.0101239	0.105994
	SERPINI1	55.6807	0.196447	0.0764233	2.57052	0.0101547	0.106226
	FITM2	403.317	-0.224013	0.0871588	-2.57017	0.010165	0.106245
	ZDHHC5	1748.4	0.149516	0.0581847	2.56968	0.0101793	0.106305
	NIT2	2054.52	0.142831	0.0556161	2.56816	0.0102239	0.106681
	SHFM1	3531.06	0.116371	0.0453204	2.56774	0.0102363	0.106721
	PPL	2307.94	-0.136182	0.0530883	-2.56519	0.0103119	0.107418
	RNASE1	194.997	-0.237037	0.0924201	-2.56478	0.0103242	0.107457
	BTG1	3447.86	-0.120321	0.0469517	-2.56266	0.0103872	0.108022
	GMNN	802.878	0.189248	0.073879	2.56159	0.0104193	0.108265
	USP16	1723.03	0.147839	0.0577337	2.56071	0.0104459	0.10845
	BSCL2	1643.08	0.149837	0.05854	2.55957	0.0104802	0.108715
	SPTSSB	29.4895	-0.160156	0.0625982	-2.55848	0.0105131	0.10872
	CD109	1451.88	0.156433	0.0611377	2.55871	0.0105063	0.10872
	FZD1	2064.88	-0.139698	0.0546038	-2.55839	0.0105157	0.10872
	INSR	2297.95	-0.134204	0.0524488	-2.55876	0.0105045	0.10872
	ARF3	3072.36	-0.121692	0.0475776	-2.55776	0.0105347	0.108827
	CCNG2	1591.99	-0.152275	0.0595579	-2.55675	0.0105654	0.109053
	EVPL	1219.45	-0.170196	0.0665806	-2.55624	0.0105811	0.109124
	MRPS16	2421.92	0.131383	0.0514152	2.55534	0.0106084	0.109315
	AIP	1661.83	-0.14907	0.0583633	-2.55416	0.0106443	0.109594
	PPP2R2A	1388.16	0.159307	0.0624108	2.55256	0.0106936	0.11001
	IL17RD	1211.2	-0.169933	0.0665842	-2.55214	0.0107062	0.110049
	CHUK	1435.74	0.156443	0.0613226	2.55114	0.0107371	0.110275
	FCN2	21.2054	-0.141377	0.0554244	-2.5508	0.0107475	0.110291
	CACNA1D	138.76	-0.230787	0.0905251	-2.54942	0.0107901	0.110637
	MUC3A	347.559	-0.226593	0.0889142	-2.54844	0.0108205	0.110766
	BAG3	1553.59	0.156364	0.0613535	2.54858	0.0108162	0.110766
	C6orf89	1235.78	-0.167013	0.0655718	-2.54702	0.0108648	0.111036
	SLC1A1	41.8915	-0.181012	0.0710654	-2.54712	0.0108615	0.111036
	CACYBP	3400.16	0.115968	0.0455548	2.54569	0.0109063	0.111368
	SEC16A	4366.73	-0.106858	0.0419867	-2.54504	0.0109266	0.111484
	SPHK1	102.81	-0.222187	0.0873433	-2.54384	0.0109643	0.111776
	PLD1	489.945	0.213619	0.0840965	2.54017	0.0110799	0.112772
	YOD1	1290.34	0.170446	0.067101	2.54015	0.0110805	0.112772
	SPC25	501.813	-0.215393	0.0848046	-2.53988	0.0110892	0.112772
	TMEM40	72.2946	0.206881	0.0814723	2.53928	0.011108	0.112778
	CROCC	433.553	-0.220138	0.0866884	-2.53942	0.0111038	0.112778
	HOMEZ	303.895	-0.228601	0.0900482	-2.53865	0.011128	0.11289
	UQCC2	622.155	0.200319	0.0789753	2.53647	0.0111975	0.113294
	NFKB1	1478.06	0.154755	0.0610172	2.53626	0.0112044	0.113294
	EIF2S1	3319.17	0.116762	0.0460372	2.53626	0.0112043	0.113294
	ANKRD13A	1413.98	-0.156734	0.0617924	-2.53645	0.0111981	0.113294
	RHBDF1	1505.58	-0.1546	0.0609852	-2.53505	0.0112432	0.113502
	AKR1B1	348.967	0.225941	0.0891252	2.5351	0.0112415	0.113502
	KCTD6	179.567	0.233971	0.0923371	2.53388	0.0112807	0.113787
	LAMP2	6359.97	0.100922	0.0398555	2.5322	0.011335	0.114009
	UNC5C	100.081	-0.221952	0.0876296	-2.53284	0.0113142	0.114009
	KDM2A	7037.18	0.0904417	0.0357157	2.53227	0.0113328	0.114009
	CHI3L2	34.6767	0.168113	0.0663936	2.53206	0.0113394	0.114009
	RASGRP1	413.211	0.218092	0.086206	2.52989	0.0114099	0.114625
	HIGD1A	2483.21	0.128158	0.0506645	2.52953	0.0114214	0.114648
	CARS	1618.75	0.152027	0.0601439	2.52771	0.0114808	0.115151
	AKAP8L	2778.19	0.126088	0.0499728	2.52312	0.0116317	0.116528
	PLEKHJ1	640.573	-0.200285	0.0794022	-2.52241	0.0116552	0.116528
	SPRED1	476.439	0.214247	0.0849376	2.5224	0.0116556	0.116528
	KPNA4	4095.11	0.110786	0.0439129	2.52286	0.0116404	0.116528
	HDGFRP2	1801.05	-0.146522	0.0580976	-2.52199	0.0116693	0.116571
	MTO1	1450.11	0.156828	0.0622305	2.52011	0.0117317	0.1171
	SLC33A1	946	-0.179346	0.0711759	-2.51975	0.0117437	0.117125
	CDC42EP4	2173.76	-0.138881	0.0551239	-2.51944	0.0117542	0.117136
	EYA2	46.0062	-0.184509	0.0732594	-2.51857	0.0117832	0.117331
	EPC2	1283.33	-0.162749	0.0646352	-2.51796	0.0118037	0.117347
	YBX1	78427	0.0611278	0.0242767	2.51797	0.0118035	0.117347
	ZBTB10	1382.08	0.160675	0.0638199	2.51762	0.011815	0.117365
	RREB1	1523.21	-0.151886	0.0603757	-2.51568	0.0118802	0.117919
	PIGN	277.108	-0.228769	0.0909834	-2.51441	0.0119233	0.118176
	DKK1	171.108	0.231951	0.0922507	2.51435	0.0119251	0.118176
	ZC3H11A	5842.33	-0.0945631	0.037623	-2.51344	0.0119561	0.118388
	STIM1	2665.52	0.126371	0.050289	2.51289	0.0119746	0.118476
	PI4K2A	811.519	0.185657	0.0738959	2.51242	0.0119907	0.118541
	KBTBD8	51.3276	0.188712	0.0751858	2.50994	0.0120751	0.119091
	TMBIM1	4045.32	-0.107144	0.0426865	-2.51002	0.0120726	0.119091
	OSR2	666.671	0.198177	0.0789401	2.51047	0.0120571	0.119091
	MAP4	12051.6	-0.0773186	0.0308166	-2.50899	0.0121077	0.119318
	RARG	861.929	-0.186312	0.0743088	-2.50727	0.0121667	0.119735
	TCEB1	2664.92	0.123976	0.049448	2.5072	0.0121692	0.119735
	MAP3K2	1615.95	0.147794	0.0589932	2.50527	0.0122357	0.120008
	DCTN4	2159.08	0.133856	0.0534207	2.5057	0.0122211	0.120008
	ULBP1	38.567	0.171525	0.068458	2.50555	0.0122262	0.120008
	ARNT	2259.13	-0.132938	0.0530587	-2.5055	0.012228	0.120008
	IL7R	16.938	0.126036	0.0503287	2.50425	0.012271	0.120259
	HDGFRP3	532.532	0.21303	0.0850785	2.50393	0.0122823	0.120276
	EXOC5	2460.46	0.133804	0.0534474	2.50347	0.0122983	0.120337
	ZC3H4	2087.83	-0.137196	0.0548441	-2.50156	0.0123648	0.120892
	EXT1	1739.1	0.145475	0.0581706	2.50083	0.0123902	0.121046
	TBC1D16	3069.14	-0.122219	0.0489742	-2.49558	0.0125751	0.122755
	SLC37A4	712.536	-0.190997	0.0765529	-2.49496	0.0125971	0.122874
	NCEH1	252.362	0.228418	0.091576	2.4943	0.0126206	0.123006
	PDGFB	680.076	-0.199664	0.0800781	-2.49336	0.012654	0.123235
	MDFIC	471.004	-0.210406	0.0844838	-2.49049	0.0127567	0.123847
	ZNF22	1438.78	0.154942	0.0622027	2.49092	0.0127414	0.123847
	CALCOCO2	999.392	0.172213	0.0691418	2.49073	0.0127482	0.123847
	GIPC3	453.118	0.211576	0.0849472	2.49068	0.0127498	0.123847
	MRPL15	3721.48	0.111654	0.0448421	2.48993	0.0127768	0.123945
	CDCA7	1675.47	-0.154089	0.0619026	-2.48922	0.0128022	0.123998
	OGFR	1685.89	0.147154	0.0591157	2.48925	0.0128012	0.123998
	HPSE	250.045	-0.22833	0.0917555	-2.48846	0.0128299	0.124169
	SMARCC1	11645.9	-0.0787861	0.031671	-2.48764	0.0128593	0.124357
	TPBG	626.336	0.197536	0.0794171	2.48732	0.012871	0.124373
	RRP15	1183.93	0.166653	0.0670372	2.48598	0.0129196	0.124746
	SOGA1	5592.35	-0.0959223	0.0386011	-2.48496	0.0129565	0.125004
	PLD3	1834.06	-0.141	0.0567747	-2.48349	0.0130101	0.125425
	IPO9	7646.87	-0.0884922	0.0356832	-2.47994	0.0131404	0.126288
	SPRY2	307.285	0.223802	0.0902401	2.48007	0.0131356	0.126288
	HSP90AB1	32259.5	0.0610246	0.0246057	2.4801	0.0131345	0.126288
	CASP3	1169.45	0.165532	0.0667383	2.48032	0.0131264	0.126288
	CACNB3	1369.41	-0.158587	0.0640471	-2.47611	0.0132824	0.127554
	TPGS2	1995.96	0.135947	0.0549377	2.47457	0.0133396	0.127951
	NUMA1	11501.3	-0.0796275	0.0321799	-2.47444	0.0133444	0.127951
	HBS1L	8811.64	0.0818797	0.0331023	2.47354	0.0133783	0.128079
	CHAF1B	1682.77	-0.146028	0.0590299	-2.4738	0.0133686	0.128079
	TPRKB	440.046	0.212364	0.0858699	2.47309	0.0133951	0.128141
	MRPL49	2159.34	0.134007	0.0541973	2.47259	0.0134139	0.128222
	PHF6	2078.16	-0.138213	0.055914	-2.47189	0.01344	0.128372
	NPR3	5081.53	-0.104958	0.0424875	-2.47034	0.0134986	0.128834
	MFSD12	2672.19	0.122792	0.0497137	2.46999	0.0135116	0.128858
	DYNC1LI1	1563.4	0.1497	0.0606481	2.46834	0.0135741	0.129355
	SAMD1	1722.98	-0.149553	0.0606032	-2.46774	0.013597	0.12938
	SLC25A5	11718.1	-0.0789641	0.0319988	-2.46772	0.0135976	0.12938
	FOXO6	276.556	-0.224459	0.0909722	-2.46734	0.0136123	0.129393
	MT-CO2	99045.4	-0.121842	0.0493861	-2.46714	0.0136198	0.129393
	RBM24	304.563	0.222385	0.0901993	2.46549	0.0136826	0.129791
	KRT18	7938.44	-0.0866747	0.0351519	-2.46572	0.0136738	0.129791
	C17orf51	760.362	0.18543	0.0752704	2.46352	0.0137578	0.130405
	PTPN18	1265.99	-0.158866	0.0644958	-2.46319	0.0137706	0.130427
	CDCA4	1624.13	-0.146813	0.0596251	-2.46227	0.013806	0.130663
	VAMP1	162.376	0.226317	0.0919408	2.46156	0.0138336	0.130824
	RYBP	841.36	0.179928	0.0731233	2.46061	0.0138699	0.131068
	UBL4A	2091.06	-0.134046	0.0544877	-2.46011	0.0138894	0.131152
	ATP11A	2698.78	-0.125338	0.0509653	-2.45928	0.0139216	0.131356
	OSBPL10	85.5021	0.206155	0.0838446	2.45878	0.013941	0.131439
	PSMF1	2105.74	0.131871	0.0536613	2.45747	0.0139919	0.131819
	MUC15	144.772	0.223394	0.0909182	2.45709	0.0140066	0.131858
	HSPA1A	1970.72	0.1349	0.0549182	2.45639	0.0140343	0.132018
	DPP3	2245.47	0.129946	0.0529471	2.45425	0.0141177	0.132602
	ARHGEF17	2693.33	-0.12325	0.0502138	-2.4545	0.014108	0.132602
	KIF13B	495.21	-0.205414	0.0837881	-2.45158	0.0142229	0.133294
	KIAA1549L	1136.13	0.163959	0.0668793	2.45157	0.0142235	0.133294
	MAP1LC3A	189.221	0.226552	0.0924112	2.45156	0.0142236	0.133294
	ACTR1A	2903.68	0.117183	0.0478128	2.45088	0.0142509	0.133449
	FAM84B	3645.25	0.108303	0.0442159	2.44942	0.0143087	0.133889
	PPP2CA	3641.73	0.108207	0.0441939	2.44846	0.0143467	0.134144
	IFNGR1	2132.32	0.131995	0.0539465	2.44678	0.0144139	0.134353
	RNF215	215.73	-0.225946	0.0923301	-2.44715	0.0143992	0.134353
	ASPH	5770.12	-0.0923427	0.0377414	-2.44672	0.0144162	0.134353
	MLXIPL	181.965	-0.225925	0.0923443	-2.44655	0.0144232	0.134353
	KCMF1	2337.3	0.126486	0.051691	2.44697	0.0144063	0.134353
	IREB2	2631.03	-0.123357	0.0504449	-2.44537	0.0144702	0.13469
	PDE8A	703.791	-0.192557	0.0787604	-2.44485	0.0144914	0.134787
	ATAD3B	938.249	0.175433	0.0717798	2.44404	0.0145236	0.134985
	ORC1	1742.49	0.143232	0.058624	2.44324	0.0145561	0.135151
	THEM6	4822.78	-0.106432	0.0435649	-2.44306	0.0145632	0.135151
	C12orf68	264.342	0.223173	0.0913882	2.44203	0.014605	0.135437
	FBLN7	519.886	-0.207446	0.0849649	-2.44155	0.0146243	0.135515
	ZHX3	1225.4	-0.157842	0.0647031	-2.43948	0.0147083	0.136192
	INA	51.4214	0.176351	0.0723439	2.43768	0.0147819	0.136771
	SLC35F3	188.684	0.224849	0.0923063	2.4359	0.0148549	0.13694
	TRIM56	731.363	0.185094	0.0759856	2.43591	0.0148542	0.13694
	LRRFIP2	1278.93	0.159999	0.0656841	2.43589	0.0148552	0.13694
	FAM120B	541.18	-0.201321	0.0826479	-2.43589	0.0148553	0.13694
	LAMA4	1981.39	-0.137659	0.0565049	-2.43624	0.014841	0.13694
	MINK1	2856.52	-0.117497	0.0482782	-2.43375	0.0149435	0.137651
	CD47	3052.87	-0.114694	0.0471548	-2.4323	0.0150035	0.137998
	UQCRC1	4101.3	-0.103029	0.0423558	-2.43246	0.0149965	0.137998
	SRD5A1	594.831	0.197137	0.0811692	2.42872	0.0151522	0.139263
	LARGE	380.637	-0.213026	0.087749	-2.42768	0.0151959	0.139562
	GDI2	10675.4	0.0784047	0.0323082	2.42677	0.0152337	0.139806
	RBL2	1045.62	-0.167965	0.0692618	-2.42507	0.0153054	0.140256
	SKP1	3998.19	0.103949	0.0428595	2.42533	0.0152943	0.140256
	CLTC	11984.8	0.0822158	0.0339064	2.42479	0.0153174	0.140263
	ADRM1	3618.05	0.112304	0.0463433	2.4233	0.0153801	0.140629
	CLN3	1742.64	-0.141892	0.0585509	-2.4234	0.0153762	0.140629
	NAA50	7876.16	0.0884508	0.0365047	2.423	0.0153931	0.140645
	FOSL2	2417.53	-0.126454	0.0522309	-2.42105	0.0154757	0.141295
	FNDC3B	3292.61	0.11657	0.0481868	2.41914	0.0155574	0.141937
	HSPA9	12468.9	0.0723818	0.0299428	2.41734	0.0156344	0.142535
	SLC1A4	1231.25	0.156679	0.0648612	2.41561	0.015709	0.142691
	RPS7	12190.3	-0.0788377	0.032636	-2.41567	0.0157063	0.142691
	LMAN1	1660.36	-0.141911	0.0587378	-2.416	0.0156919	0.142691
	NMNAT3	74.6742	-0.199292	0.0824933	-2.41586	0.0156981	0.142691
	MRPL51	2264.86	0.127278	0.0526762	2.41623	0.0156823	0.142691
	CDKN2A	4290.54	-0.109181	0.0452814	-2.41116	0.0159019	0.143837
	WDR47	1106.66	0.164566	0.0682597	2.41089	0.0159138	0.143837
	ARL4A	510.937	0.200156	0.0830326	2.41057	0.0159275	0.143837
	KLHL12	1583.59	-0.143372	0.0594909	-2.40998	0.0159532	0.143837
	PTPN12	4933.91	0.100592	0.0417066	2.41189	0.0158699	0.143837
	ERGIC1	2393.78	-0.124023	0.0514464	-2.41072	0.0159211	0.143837
	ITSN2	1277.12	0.154154	0.0639636	2.41003	0.0159511	0.143837
	SEPT9	7500.7	-0.09187	0.0380916	-2.41182	0.0158732	0.143837
	IFT122	806.518	-0.177399	0.0736028	-2.41023	0.0159425	0.143837
	FAM206A	590.452	0.19368	0.080304	2.41183	0.0158726	0.143837
	CDH24	244.714	-0.221033	0.0917236	-2.40977	0.0159625	0.143837
	SGSM1	154.471	-0.220284	0.0914852	-2.40787	0.0160459	0.144483
	DNAJC22	45.7449	-0.175724	0.073005	-2.40701	0.0160836	0.144638
	TMTC4	331.886	-0.215944	0.0897167	-2.40695	0.0160864	0.144638
	DBF4	3021.97	0.114328	0.0475109	2.40634	0.0161132	0.144669
	MAP3K11	2034.81	0.130953	0.0544152	2.40655	0.016104	0.144669
	DFNA5	157.732	-0.220978	0.0918557	-2.40571	0.0161412	0.144816
	PSPH	594.699	0.194161	0.0807282	2.40512	0.016167	0.144943
	NRP2	46.2094	0.174591	0.0726183	2.40423	0.0162064	0.145191
	LZTS3	1892.33	-0.136236	0.0566786	-2.40365	0.0162323	0.145318
	PSMD4	6905.75	0.0855268	0.0355877	2.40327	0.0162492	0.145365
	SH3PXD2A	1387.3	-0.150164	0.0624984	-2.40269	0.016275	0.145386
	PEA15	10755.7	0.0760932	0.0316687	2.40278	0.0162708	0.145386
	NF1	3567.01	-0.118477	0.049318	-2.40231	0.0162921	0.145434
	TACO1	365.665	0.211457	0.0880373	2.4019	0.0163102	0.145491
	SLC43A3	1548.64	0.143821	0.0599031	2.4009	0.0163548	0.145784
	PSMB3	3605.09	0.106521	0.0444297	2.39751	0.0165068	0.147034
	ATP10A	372.568	0.210939	0.0880611	2.39537	0.0166037	0.147419
	RRAGD	282.029	0.218847	0.0913459	2.3958	0.016584	0.147419
	PSME4	6367.2	0.0948719	0.0396065	2.39536	0.0166039	0.147419
	B9D1	306.489	-0.216691	0.0904771	-2.39498	0.0166213	0.147419
	MEX3A	5430.09	-0.0941264	0.0392999	-2.39508	0.0166167	0.147419
	RSL1D1	6851.04	0.0897268	0.0374468	2.39612	0.0165698	0.147419
	SORT1	4258.08	-0.109401	0.0456889	-2.39449	0.0166437	0.147512
	SIRPA	2107.6	0.129266	0.0541055	2.38914	0.0168878	0.149569
	PCGF6	269.554	0.218007	0.0912697	2.3886	0.0169128	0.149683
	SUPV3L1	1240.89	0.154877	0.0648607	2.38784	0.0169476	0.149841
	NT5E	186.27	0.220623	0.0924003	2.38769	0.0169547	0.149841
	COPS8	653.883	0.188565	0.0789841	2.38738	0.0169689	0.14986
	HIVEP2	242.108	0.220508	0.0924085	2.38623	0.0170222	0.150223
	YWHAH	4274.86	0.105312	0.0441472	2.38548	0.0170567	0.150421
	LPP	2187.08	-0.130306	0.0546368	-2.38495	0.0170817	0.150534
	ATXN7L3B	3347.1	-0.110426	0.0463099	-2.3845	0.0171023	0.150609
	HAT1	3897.7	0.104871	0.0440018	2.38334	0.0171565	0.15098
	COTL1	5825.39	0.101362	0.0425514	2.3821	0.0172142	0.151104
	ASAH1	725.888	-0.18998	0.0797467	-2.3823	0.0172049	0.151104
	MB21D1	1456.14	0.145326	0.0610101	2.38201	0.0172186	0.151104
	AP2B1	11053.7	0.0735883	0.0308936	2.38199	0.0172193	0.151104
	SEMA6A	570.73	-0.191783	0.080589	-2.37976	0.0173238	0.151847
	SDC3	1191.85	-0.15543	0.0653158	-2.37966	0.0173284	0.151847
	THEMIS2	724.161	0.181193	0.0761559	2.37924	0.0173485	0.151915
	FGFR2	997.216	-0.167389	0.0704435	-2.37621	0.0174913	0.153059
	ARHGAP26	358.847	0.211774	0.0891683	2.375	0.0175491	0.153456
	NSUN2	3373.15	0.110343	0.0464913	2.37341	0.0176246	0.154008
	ANXA6	2102	-0.128275	0.0540705	-2.37237	0.0176742	0.154223
	MYO5C	2285.57	-0.12558	0.0529421	-2.37203	0.0176906	0.154223
	IQSEC1	820.227	-0.175743	0.0740736	-2.37255	0.0176659	0.154223
	TUB	501.806	-0.197557	0.0832922	-2.37186	0.017699	0.154223
	XRCC6	8129.32	0.0804057	0.0339121	2.371	0.0177398	0.15441
	C5orf24	2137.29	-0.133698	0.0563913	-2.37089	0.0177453	0.15441
	TCEA1	2058.66	0.128465	0.0541948	2.37043	0.0177674	0.154494
	IARS	10499.8	0.0786831	0.0332114	2.36916	0.0178285	0.154593
	NUCB1	4105.74	-0.101171	0.0426913	-2.36983	0.0177963	0.154593
	NDUFAF4	475.361	0.198951	0.083961	2.36956	0.0178092	0.154593
	FGFR3	290.203	-0.214991	0.0907375	-2.36937	0.0178185	0.154593
	CHML	2172.94	0.127404	0.0537886	2.3686	0.0178556	0.154719
	ASS1	1456.6	-0.14725	0.0621868	-2.36786	0.0178913	0.15492
	DDR2	105.579	0.208584	0.0881086	2.36735	0.017916	0.15493
	PPP1R21	702.607	-0.186436	0.0787624	-2.36706	0.0179298	0.15493
	NAA20	1183.38	0.162924	0.068823	2.36729	0.0179187	0.15493
	PPM1G	5842.16	-0.0973481	0.0411403	-2.36625	0.0179695	0.155165
	SMIM14	1075.8	-0.161108	0.0681383	-2.36442	0.0180582	0.155823
	SMEK1	2560.66	0.121126	0.0512396	2.36392	0.0180828	0.155927
	MTDH	10511.9	0.079516	0.0336501	2.36303	0.0181264	0.156194
	ABHD1	17.7073	-0.118055	0.0499754	-2.36227	0.0181635	0.156405
	ECD	1007.12	0.165309	0.0700452	2.36004	0.0182732	0.157241
	HSP90AA1	63552.2	0.0578466	0.0245241	2.35876	0.0183359	0.157671
	PRKACA	6026.22	-0.0875546	0.037145	-2.3571	0.0184182	0.157957
	RASAL2	3592.05	-0.104378	0.0442688	-2.35783	0.0183823	0.157957
	TGIF1	2101.38	-0.126277	0.0535739	-2.35707	0.01842	0.157957
	COX6C	3480.56	0.107264	0.0455072	2.35707	0.0184199	0.157957
	MAP7	3292.66	0.108387	0.0459971	2.35639	0.0184535	0.158135
	PIEZO1	5197.73	-0.104665	0.0444283	-2.35582	0.0184817	0.158267
	TTC39B	187.361	0.217564	0.0924103	2.35433	0.0185561	0.158795
	NUAK2	294.36	0.212761	0.0903929	2.35373	0.0185859	0.158847
	CCDC6	2502.82	0.120386	0.0511478	2.3537	0.0185878	0.158847
	SYNE4	504.948	-0.196306	0.0835122	-2.35063	0.0187415	0.16005
	C11orf24	1154.99	0.15806	0.067253	2.35022	0.0187622	0.160082
	NINL	526.554	-0.194267	0.0826653	-2.35005	0.018771	0.160082
	PKD2	304.17	-0.212495	0.0904532	-2.34922	0.0188125	0.160107
	AP2A1	2509.58	-0.118822	0.0505698	-2.34967	0.0187903	0.160107
	LEPROT	1329.13	-0.149261	0.0635333	-2.34934	0.0188067	0.160107
	BSG	11674.9	0.0750316	0.0319476	2.34858	0.018845	0.160273
	FZD2	119.682	-0.210588	0.0896859	-2.34806	0.0188715	0.160389
	DLGAP5	2142.9	-0.125682	0.0535508	-2.34697	0.018927	0.16075
	TM9SF4	3471.93	-0.105557	0.045024	-2.34446	0.0190546	0.161723
	GPS2	1038.07	0.160484	0.0684665	2.34398	0.0190791	0.161821
	NUP35	2254.02	0.123505	0.0527554	2.34109	0.0192276	0.162969
	DGCR2	1838.6	-0.131586	0.0562396	-2.33974	0.0192969	0.163333
	RP11-1220K2.2	1679.09	-0.13617	0.0581981	-2.33977	0.0192956	0.163333
	TKT	14049.5	-0.0709566	0.0303358	-2.33903	0.0193336	0.163533
	SOCS2	57.7412	0.179171	0.0766298	2.33813	0.0193803	0.163815
	AMPD2	2953.91	-0.111684	0.0478039	-2.33629	0.0194761	0.164514
	CERS2	9371.82	0.0788824	0.0337698	2.33589	0.0194972	0.164579
	ETFB	866.327	-0.168264	0.0720505	-2.33537	0.0195243	0.164697
	MKL2	1398.59	-0.145123	0.062186	-2.3337	0.0196114	0.165252
	SLC5A3	2013.98	-0.1389	0.0595217	-2.3336	0.0196168	0.165252
	CDC37	4739.29	-0.102695	0.0440133	-2.33327	0.0196338	0.165283
	EMP1	44428.5	0.0555584	0.0238224	2.33219	0.0196908	0.165651
	NEK6	1199.27	-0.154495	0.0662883	-2.33065	0.0197717	0.166219
	CHI3L1	515.614	-0.193278	0.082966	-2.32961	0.0198267	0.166568
	PLD2	868.53	-0.168738	0.0724401	-2.32935	0.0198407	0.166574
	BAHD1	1890.86	0.130084	0.0558591	2.32878	0.0198707	0.166713
	PSMD6	1528.4	0.140719	0.060478	2.32679	0.0199766	0.167488
	UCKL1	994.028	-0.163885	0.0704605	-2.32592	0.0200229	0.167763
	HOOK2	3301.83	-0.107233	0.0461396	-2.32411	0.0201198	0.168461
	REC8	110.328	0.206919	0.0890595	2.32338	0.0201586	0.168558
	MRPL13	1613.65	0.139583	0.0600756	2.32345	0.0201548	0.168558
	ADM	20.5163	0.12705	0.0547003	2.32265	0.0201979	0.168774
	INHBB	1245.17	-0.152192	0.0655532	-2.32166	0.0202513	0.169017
	C15orf38	343.634	-0.206498	0.0889462	-2.3216	0.0202543	0.169017
	ATP5B	15352.6	-0.0687938	0.0296629	-2.31919	0.0203849	0.169993
	ARRDC3	318.865	0.209934	0.0905719	2.31787	0.0204564	0.170475
	KCNMB4	510.817	-0.192447	0.0830387	-2.31756	0.0204731	0.1705
	PSMC5	2340.57	0.119886	0.0517488	2.31668	0.020521	0.170784
	INTS3	3108.33	-0.112036	0.0483688	-2.31629	0.0205422	0.170845
	TNFAIP8L1	550.122	-0.19328	0.0834792	-2.31531	0.0205962	0.171066
	C4orf48	262.327	0.21232	0.0916949	2.31551	0.0205851	0.171066
	DIDO1	3649.33	-0.106841	0.0461578	-2.3147	0.0206296	0.171228
	TMEM9B	961.336	0.161718	0.0698892	2.31392	0.020672	0.171466
	SCUBE3	55.6754	-0.178409	0.0771189	-2.31343	0.020699	0.171575
	FAM91A1	3614.42	0.113277	0.048992	2.31215	0.0207693	0.172043
	ENOSF1	1178.02	-0.152767	0.0661195	-2.31047	0.0208622	0.172582
	TIMM17A	2592.88	0.118735	0.051385	2.3107	0.0208493	0.172582
	NQO1	3501.04	0.103727	0.044906	2.30986	0.0208958	0.172745
	DUSP7	1355.66	0.145321	0.062935	2.30907	0.0209396	0.172992
	HIST1H3D	23.7921	0.133966	0.0580354	2.30835	0.0209797	0.173126
	CDCA7L	2315.95	-0.120696	0.0522883	-2.30828	0.0209836	0.173126
	RAB11B	1539.08	-0.141793	0.0614531	-2.30735	0.0210356	0.173439
	PFDN5	1975.17	-0.127705	0.0553589	-2.30686	0.0210626	0.173546
	SYT12	2388.52	-0.118145	0.051226	-2.30635	0.0210912	0.173667
	ZBTB37	566.315	-0.187854	0.08147	-2.3058	0.0211216	0.173802
	DNAJB11	1564.28	0.144031	0.062488	2.30494	0.0211699	0.173863
	RAB20	431.491	-0.197424	0.0856445	-2.30516	0.0211574	0.173863
	CCDC50	1077.16	0.157851	0.0684843	2.30492	0.021171	0.173863
	UNC5B	108.424	0.204641	0.08883	2.30373	0.0212377	0.174295
	PTPN13	837.553	-0.167693	0.0728682	-2.30132	0.0213738	0.175275
	THRA	581.814	-0.18592	0.0807956	-2.30111	0.0213853	0.175275
	PALLD	3059.73	0.113301	0.0492502	2.30051	0.0214194	0.175439
	CASP9	178.597	-0.21233	0.0923363	-2.29953	0.0214748	0.175776
	NBAS	1681.33	-0.136708	0.0594576	-2.29925	0.0214907	0.175791
	PANX2	1390.51	0.143168	0.0622955	2.29821	0.0215499	0.175965
	CDC42BPB	3076.64	-0.107515	0.0467836	-2.29813	0.0215545	0.175965
	CDKN3	1279.78	0.148981	0.0648211	2.29834	0.0215426	0.175965
	GPR125	1045.2	-0.164325	0.0715922	-2.29529	0.0217166	0.176823
	DUSP4	200.983	0.212167	0.0924197	2.29569	0.0216934	0.176823
	ARHGDIA	5400.34	0.0926314	0.040351	2.29564	0.0216964	0.176823
	DUSP8	686.869	0.178082	0.0775846	2.29533	0.0217141	0.176823
	ADAMTS1	3374.71	0.104118	0.0453777	2.29447	0.0217635	0.177089
	WLS	749.582	0.172399	0.0751965	2.29265	0.021868	0.177823
	SPTBN2	4851.41	-0.0929232	0.040554	-2.29135	0.0219433	0.178201
	PFKM	2228.09	-0.1215	0.0530228	-2.29146	0.0219369	0.178201
	ZBTB42	599.976	-0.186074	0.0812983	-2.28878	0.0220921	0.179293
	EVC	200.127	-0.211398	0.0924019	-2.28781	0.0221483	0.179631
	MRPL20	1286.75	0.149188	0.0652179	2.28753	0.0221652	0.179651
	ACTN4	20633.1	-0.0635298	0.0277836	-2.28659	0.0222196	0.179975
	MTA2	7056.5	0.0815597	0.0357039	2.28433	0.0223519	0.180928
	PITPNM1	1009.9	-0.157956	0.0691589	-2.28396	0.0223739	0.180988
	FBXO27	223.693	-0.210407	0.0921578	-2.28312	0.0224235	0.181271
	C14orf166	2318.27	0.118413	0.0518739	2.28271	0.0224476	0.181348
	LIN7C	1194.11	0.156967	0.0687748	2.28233	0.0224696	0.181408
	DARS2	2835.51	-0.112952	0.0495185	-2.281	0.0225485	0.181809
	PADI2	2403.37	0.119397	0.0523421	2.28109	0.0225429	0.181809
	EIF1B	841.565	0.166532	0.0730363	2.28012	0.0226005	0.182109
	ATP8B2	61.5492	0.177061	0.0776899	2.27907	0.0226629	0.182376
	ANO6	2220.48	-0.121339	0.0532363	-2.27926	0.0226517	0.182376
	SMO	773.433	-0.175911	0.0772254	-2.27788	0.0227334	0.182825
	ADAM12	608.887	0.18383	0.0807482	2.27658	0.0228114	0.183214
	UVRAG	540.426	0.18874	0.0829025	2.27665	0.022807	0.183214
	DPM3	409.659	-0.202185	0.0888653	-2.27518	0.0228948	0.183765
	MACROD1	659.55	-0.181905	0.0799845	-2.27425	0.0229512	0.184099
	WIPI1	228.324	-0.209361	0.0920719	-2.27388	0.0229732	0.184156
	SSH3	924.732	-0.163602	0.0719631	-2.27341	0.0230013	0.184263
	PRR14L	1550.06	-0.135955	0.0598161	-2.27288	0.0230333	0.184281
	SUV420H1	1802.96	0.134775	0.0592928	2.27305	0.0230233	0.184281
	MTMR12	1572.37	0.136604	0.0601125	2.27247	0.0230579	0.184349
	MUM1	1514.79	-0.137253	0.0604041	-2.27225	0.0230715	0.184349
	TRPC4AP	2655.7	-0.112965	0.0497341	-2.27139	0.0231235	0.184495
	KAZALD1	100.119	-0.198338	0.0873473	-2.27068	0.0231661	0.184495
	CXXC4	108.009	-0.200858	0.0884549	-2.27074	0.0231627	0.184495
	ZBED6	668.014	-0.176922	0.0779227	-2.27047	0.0231789	0.184495
	SMURF2	1411.65	0.141192	0.0621759	2.27085	0.023156	0.184495
	SVOPL	98.2221	-0.198417	0.0873587	-2.27129	0.0231291	0.184495
	BTG3	1346.31	0.143555	0.0632434	2.26988	0.0232147	0.184662
	EIF3J	3333.6	0.105768	0.0466016	2.26963	0.0232301	0.184666
	PEBP1	6191.63	-0.0839476	0.0370362	-2.26664	0.0234123	0.185995
	ANKRD54	962.307	0.159785	0.0705095	2.26615	0.0234423	0.186115
	USP7	5026.36	0.0896138	0.0395558	2.2655	0.0234819	0.18631
	GSR	1538.4	-0.137261	0.0605945	-2.26523	0.0234984	0.186322
	TRIM37	1044.97	-0.155056	0.0685016	-2.26353	0.023603	0.187032
	ARHGEF25	342.943	-0.202864	0.0896504	-2.26284	0.0236457	0.18725
	CLPTM1L	2354.39	0.11764	0.0520008	2.26227	0.0236809	0.18741
	CNTNAP2	746.589	-0.170397	0.0753522	-2.26134	0.023738	0.187638
	XRCC4	79.9148	0.189954	0.0840018	2.26131	0.0237399	0.187638
	PCYT1A	2933.08	0.109842	0.0485977	2.26022	0.0238076	0.188053
	MARCKS	4174.61	-0.0953073	0.0421783	-2.25963	0.0238443	0.188103
	SLC24A1	343.281	-0.200569	0.0887561	-2.25978	0.023835	0.188103
	NDUFS6	972.692	0.157718	0.0698246	2.25878	0.0238973	0.188258
	PXDN	6803.02	0.0817825	0.0362096	2.25858	0.0239093	0.188258
	SLC41A3	1576.24	-0.134273	0.0594396	-2.25898	0.0238844	0.188258
	DNMT1	6966.26	-0.0799175	0.0353907	-2.25815	0.0239366	0.188293
	C9orf3	591.136	0.184187	0.0815699	2.25802	0.0239442	0.188293
	GALNT10	483.003	-0.191919	0.0850141	-2.2575	0.0239769	0.188431
	RBP7	1180.51	0.147854	0.0655821	2.25449	0.0241655	0.189793
	MRPL47	1405.16	0.139187	0.0617547	2.25386	0.0242047	0.189981
	FBXO21	1596.42	-0.13394	0.0594459	-2.25314	0.0242506	0.190101
	HECTD4	1456.14	-0.141214	0.0626727	-2.25319	0.024247	0.190101
	DLG3	874.269	-0.163415	0.0726161	-2.25039	0.024424	0.191339
	SIN3A	2586.68	-0.111817	0.0497649	-2.24691	0.0246459	0.192956
	S100A6	7994.76	-0.0776175	0.0345948	-2.24362	0.0248568	0.194484
	ARHGAP35	6141.24	-0.083063	0.0370477	-2.24206	0.0249578	0.195151
	SS18L1	1206.5	-0.146475	0.0653454	-2.24155	0.0249902	0.19516
	CRYAB	3218.56	0.104431	0.0465865	2.24166	0.0249834	0.19516
	PEAK1	1503.24	-0.13879	0.0619329	-2.24097	0.0250281	0.195333
	ARHGEF9	1640.77	-0.132693	0.0592288	-2.24035	0.025068	0.195521
	SNAI2	168.709	-0.206202	0.0921382	-2.23796	0.0252235	0.19661
	TTC21B	477.614	-0.189452	0.0846849	-2.23714	0.0252774	0.196783
	LIF	368.762	0.196492	0.0878257	2.2373	0.0252667	0.196783
	AKR7A2	939.584	-0.157996	0.0707235	-2.23399	0.0254836	0.198265
	ANKFY1	2184.02	0.120071	0.0537629	2.23334	0.0255265	0.198472
	GAS6	410.842	-0.195297	0.0874743	-2.23262	0.0255742	0.198472
	PCDH1	617.487	-0.176902	0.0792257	-2.23289	0.0255565	0.198472
	KDELR1	5398.93	-0.0872527	0.0390768	-2.23285	0.0255589	0.198472
	KIAA1143	625.506	-0.176501	0.0791262	-2.23062	0.0257061	0.199371
	APOBEC3C	228.189	0.20539	0.0920992	2.23009	0.0257414	0.19952
	C5orf22	786.958	0.165747	0.0743442	2.22945	0.0257839	0.199701
	VPS11	360.745	-0.196272	0.0880439	-2.22925	0.0257969	0.199701
	DBR1	787.878	0.166121	0.0745434	2.22851	0.0258468	0.199962
	FKBP9	3126.83	-0.103945	0.0466618	-2.22762	0.0259059	0.200214
	CXCL11	1055.26	-0.157988	0.070925	-2.22754	0.0259115	0.200214
	ALKBH5	3314.65	0.101993	0.0458053	2.22666	0.0259703	0.200434
	TLE1	4065.45	0.0944799	0.0424319	2.22663	0.0259723	0.200434
	PAK4	2168.32	-0.124482	0.0559536	-2.22474	0.0260989	0.201036
	CDV3	6222.99	0.0839062	0.037711	2.22498	0.0260826	0.201036
	PPP3R1	3414.69	0.10041	0.0451325	2.22478	0.0260962	0.201036
	PPP1R12A	1455.53	-0.136545	0.0614203	-2.22313	0.0262072	0.201638
	ATP9A	3793.66	-0.0981431	0.0441539	-2.22275	0.0262325	0.201638
	PRPF4	1785.93	0.13094	0.0589125	2.22261	0.026242	0.201638
	SLC9A7	514.015	0.184384	0.0829488	2.22286	0.0262253	0.201638
	SLC25A25	855.687	0.164795	0.0741646	2.22202	0.0262821	0.201821
	CDK17	362.925	0.19886	0.089516	2.2215	0.0263171	0.20184
	SVIP	974.436	0.158841	0.0715013	2.22152	0.0263159	0.20184
	SETD1B	1752.88	-0.128003	0.0576301	-2.22112	0.0263429	0.201914
	POGZ	3891.66	-0.0983106	0.0442704	-2.22068	0.0263724	0.202015
	DDRGK1	1534.55	0.140609	0.0633415	2.21986	0.0264286	0.20232
	PPA1	4401.98	0.0965755	0.0435202	2.21909	0.0264803	0.202584
	DYNC1I2	6214.83	-0.083761	0.0377494	-2.21887	0.0264956	0.202584
	PITPNM3	398.095	-0.196289	0.0885034	-2.21786	0.0265641	0.202982
	RANGAP1	4456.82	0.0914201	0.0412433	2.2166	0.0266502	0.20339
	DIAPH1	10433.3	0.0697245	0.0314545	2.21668	0.0266448	0.20339
	TBC1D15	1331.39	0.149555	0.0674962	2.21575	0.0267086	0.203711
	MUC16	880.988	-0.204664	0.0923852	-2.21533	0.0267375	0.203806
	ST3GAL6	678.28	0.172372	0.0778226	2.21494	0.0267643	0.203885
	PRR12	1750.57	-0.13096	0.0591717	-2.21323	0.0268821	0.204657
	CCNL1	1398.94	0.1369	0.061869	2.21274	0.0269156	0.204786
	BRD8	1602.58	-0.13111	0.0592645	-2.21229	0.0269463	0.204894
	AGPAT1	1873.96	-0.127066	0.0574943	-2.21006	0.0271009	0.205803
	SIX5	830.059	-0.167945	0.0759832	-2.21028	0.0270854	0.205803
	UBN1	2371.21	0.115148	0.0521067	2.20985	0.0271155	0.205803
	CASZ1	2383.9	-0.11402	0.0516027	-2.20958	0.0271343	0.20582
	BRD4	9653.3	0.071104	0.0322119	2.20738	0.0272875	0.206855
	UBE2Q1	4407.89	-0.0908765	0.0411812	-2.20675	0.0273315	0.207062
	PRPF40B	525.957	-0.184164	0.0835182	-2.20508	0.0274484	0.207779
	SUCLG2	1492.68	-0.14154	0.0641995	-2.20469	0.0274758	0.207779
	CCBL1	197.293	-0.203753	0.092418	-2.20468	0.0274762	0.207779
	NRAS	3472.47	0.0997609	0.045274	2.20349	0.02756	0.208285
	PRSS27	199.409	-0.203582	0.0924096	-2.20304	0.0275921	0.208401
	GNB4	1855.43	0.124641	0.0565849	2.20273	0.027614	0.20844
	ACIN1	4453.14	-0.0904927	0.0410952	-2.20203	0.0276633	0.208685
	CASP8	474.936	0.184938	0.0840307	2.20084	0.0277476	0.209076
	AKAP11	1434.31	-0.135731	0.0616729	-2.20082	0.0277489	0.209076
	NPLOC4	3308.1	0.108012	0.0490833	2.20058	0.0277658	0.209077
	RAB13	1466.65	-0.134067	0.0609653	-2.19907	0.0278728	0.209756
	SEC61G	1454.37	0.134885	0.0613763	2.19767	0.0279727	0.210254
	PCK2	403.99	0.193801	0.0881852	2.19767	0.0279729	0.210254
	PANX1	696.205	0.171024	0.0778736	2.19617	0.0280798	0.21093
	GGT6	16.0695	-0.107019	0.0487424	-2.19561	0.0281198	0.211077
	NSFL1C	1941.02	0.123011	0.0560306	2.19542	0.0281334	0.211077
	TLR2	20.1516	0.118888	0.0541703	2.1947	0.0281849	0.211336
	YWHAZ	30368.9	0.057729	0.0263207	2.19329	0.0282864	0.211735
	BCLAF1	8095.43	0.0794615	0.0362282	2.19336	0.0282812	0.211735
	SERINC1	2904.79	0.106446	0.0485332	2.19325	0.0282894	0.211735
	MED15	1867.4	-0.125229	0.05715	-2.19123	0.0284355	0.212701
	ATP5C1	4577.11	0.0898735	0.0410297	2.19045	0.0284917	0.212865
	C12orf23	1188.68	-0.150697	0.0687963	-2.19048	0.0284892	0.212865
	SLC34A2	7370.79	0.0764716	0.0349296	2.18931	0.0285746	0.213227
	NUDCD1	2790.01	0.107519	0.04911	2.18935	0.0285713	0.213227
	GTF3C4	4387.53	-0.09218	0.042114	-2.18882	0.0286097	0.213361
	CLIP4	1865.45	-0.126093	0.0576304	-2.18796	0.0286727	0.213703
	HGSNAT	1537.78	-0.133482	0.0610185	-2.18757	0.028701	0.213786
	ERGIC3	3687.04	-0.105513	0.048259	-2.18639	0.0287872	0.21417
	STK38L	1182.8	0.145435	0.0665175	2.18642	0.0287848	0.21417
	DDHD2	3052.76	-0.102456	0.0468963	-2.18473	0.0289085	0.214944
	CALU	12373.4	-0.0657134	0.0300922	-2.18374	0.0289815	0.215358
	NDST1	4770.75	-0.0878841	0.0402586	-2.18299	0.0290364	0.215637
	AMER1	1461.13	-0.134817	0.0618249	-2.18063	0.0292109	0.216552
	ACADS	162.096	-0.200799	0.0920678	-2.18099	0.0291842	0.216552
	PDCD5	2060.83	0.119821	0.0549484	2.18061	0.029212	0.216552
	CCDC106	774.94	-0.16224	0.0744935	-2.17791	0.0294129	0.217912
	SYNGR1	404.508	-0.1891	0.0868499	-2.17733	0.0294563	0.217936
	BCCIP	1500.49	0.13361	0.0613649	2.1773	0.0294583	0.217936
	C1GALT1C1	651.383	-0.170117	0.0781373	-2.17716	0.0294689	0.217936
	FAM179B	292.872	0.196611	0.0904354	2.17404	0.0297018	0.219154
	POLR1E	1731.84	-0.126929	0.0584081	-2.17314	0.0297696	0.219154
	CYLD	360.898	0.192007	0.0883404	2.17349	0.0297434	0.219154
	TSR3	914.904	0.160507	0.0738548	2.17328	0.0297596	0.219154
	SEC61A2	164.345	0.199869	0.0919754	2.17307	0.0297748	0.219154
	SIRT5	381.706	-0.191229	0.08797	-2.17379	0.0297207	0.219154
	EIF3A	11411.4	-0.0672721	0.030941	-2.1742	0.0296899	0.219154
	SLC35E2B	1260.46	-0.141179	0.0649525	-2.17357	0.0297374	0.219154
	VEZF1	1291.42	0.14399	0.0662729	2.17269	0.0298039	0.219238
	CCDC80	49.515	-0.159703	0.0735457	-2.17148	0.0298946	0.219775
	ODF3B	213.431	0.200656	0.0924199	2.17113	0.0299214	0.219843
	TUBA1B	20784.2	-0.05957	0.0274513	-2.17002	0.030005	0.220327
	SHMT1	1271.83	-0.139517	0.0643012	-2.16975	0.030026	0.22035
	NR3C1	982.608	0.154787	0.0713939	2.16807	0.0301531	0.220761
	THBS3	1411.64	-0.136693	0.0630365	-2.16847	0.0301233	0.220761
	EMC10	3192.65	0.107674	0.0496575	2.16833	0.0301335	0.220761
	GRHL3	344.527	-0.192173	0.0886285	-2.1683	0.0301358	0.220761
	ZNF33B	1374.98	-0.136776	0.0630993	-2.16763	0.0301871	0.22088
	PSMB8	533.164	0.178373	0.0823086	2.16712	0.0302253	0.221029
	DYNC1I1	147.165	0.198117	0.0914443	2.16653	0.0302707	0.221231
	ATL3	3705.09	0.097179	0.0448891	2.16487	0.0303979	0.22203
	PHF13	1281.91	-0.139843	0.0646629	-2.16264	0.0305686	0.222975
	CDK1	2707.73	0.108573	0.0502125	2.16226	0.030598	0.222975
	CLP1	178.105	0.199622	0.0923217	2.16225	0.0305991	0.222975
	RPL23	16223.5	-0.0633717	0.0293078	-2.16228	0.0305966	0.222975
	ACKR2	1082.35	-0.146829	0.06793	-2.16148	0.0306583	0.223275
	GLYR1	2797.84	-0.104815	0.0485098	-2.16071	0.0307179	0.223447
	ULK2	1111.76	-0.144414	0.0668353	-2.16074	0.0307152	0.223447
	ENY2	3324.59	0.0989213	0.0457906	2.1603	0.0307496	0.223538
	RIOK3	3271.89	0.0995019	0.046064	2.16008	0.0307664	0.223538
	MBNL1	7055.67	0.085284	0.0395314	2.15737	0.0309765	0.224251
	DDOST	7623.46	-0.0766877	0.0355506	-2.15715	0.0309944	0.224251
	METTL18	345.041	0.195126	0.0904561	2.15714	0.0309951	0.224251
	KLHL5	3881.94	0.101313	0.046943	2.15822	0.0309105	0.224251
	KIF1B	5097.53	0.0895279	0.0415033	2.15713	0.0309955	0.224251
	ATP6V0B	4291.63	0.0940047	0.0435697	2.15757	0.0309614	0.224251
	LIN9	651.537	0.170428	0.0790161	2.15688	0.031015	0.224251
	ST3GAL4	868.94	0.156676	0.072625	2.15733	0.0309798	0.224251
	FURIN	2363.97	0.112999	0.0523936	2.15673	0.031027	0.224251
	SCD5	3599.69	-0.0977473	0.0453454	-2.15562	0.0311136	0.224641
	LAMP1	4108.7	0.0915436	0.0424684	2.15557	0.0311172	0.224641
	LGR5	59.1091	0.169388	0.0786093	2.15481	0.0311765	0.224718
	MYH9	30824.8	-0.0547095	0.0253889	-2.15485	0.0311732	0.224718
	CLDN4	11100.9	-0.0775037	0.035969	-2.15474	0.0311822	0.224718
	USP47	1831.58	0.124706	0.0578866	2.15432	0.0312154	0.224827
	COPZ1	2583.59	-0.109202	0.0507236	-2.15287	0.0313286	0.225511
	EEF1A2	186.916	0.198917	0.0924064	2.15264	0.0313473	0.225515
	ELMO3	1047.5	-0.149219	0.0693414	-2.15195	0.0314015	0.225774
	SLC39A13	1072.11	-0.145013	0.0674687	-2.14934	0.0316077	0.227126
	SEZ6L2	728.008	-0.166695	0.0775873	-2.14849	0.031675	0.227418
	LRRC32	132.035	0.194836	0.0906905	2.14836	0.031685	0.227418
	MT-ATP6	38977.1	-0.0635882	0.0296145	-2.1472	0.0317775	0.22795
	MARK3	1785.43	0.12465	0.0580647	2.14673	0.0318144	0.228023
	RRP1B	2752.2	0.108417	0.0505062	2.14661	0.0318244	0.228023
	YES1	9723.57	0.0793535	0.036972	2.14631	0.0318479	0.22806
	SMYD2	2190.74	0.114393	0.0533113	2.14576	0.0318919	0.228243
	CCNC	1599.54	0.127999	0.0596647	2.1453	0.0319289	0.228376
	DCLRE1C	453.434	0.181832	0.0847884	2.14454	0.0319894	0.228677
	TUBE1	227.602	0.19758	0.0921541	2.14402	0.0320315	0.228846
	CDC6	1437.01	0.1325	0.0618601	2.14193	0.0321995	0.229914
	HSPA4L	1084.29	0.146041	0.0681996	2.14138	0.0322432	0.229962
	EHD1	4998.55	0.0853217	0.039844	2.1414	0.0322421	0.229962
	SLC25A13	1633.42	0.126823	0.0592666	2.13987	0.0323649	0.230697
	DPY19L4	1671.52	-0.134939	0.0630788	-2.13922	0.0324181	0.230944
	UBTF	3092.66	-0.103593	0.0484382	-2.13866	0.0324628	0.23113
	GTF3C1	3005.65	-0.103145	0.0482516	-2.13765	0.0325451	0.231583
	HTATIP2	1582.25	0.132267	0.0618952	2.13695	0.0326024	0.231713
	GPC1	677.293	-0.167027	0.078186	-2.13628	0.0326567	0.231713
	LONRF3	62.0349	0.169342	0.0792612	2.1365	0.0326386	0.231713
	PTGES3	10519.7	0.0754467	0.0353054	2.13697	0.0326001	0.231713
	FAM210B	1233.35	-0.140188	0.0656113	-2.13664	0.0326269	0.231713
	PSMD1	3248.71	0.0980953	0.0459243	2.13602	0.0326777	0.23173
	ETV7	29.3118	0.133001	0.0623026	2.13476	0.0327805	0.232326
	LIPG	679.201	-0.16909	0.0792163	-2.13453	0.0327994	0.232328
	ARID5A	579.895	0.171691	0.0804471	2.13421	0.0328254	0.232379
	PLEKHG4B	2246.07	-0.121247	0.0568295	-2.13352	0.0328819	0.232647
	SRCAP	5362.62	-0.0863887	0.040505	-2.13279	0.0329417	0.232804
	ELF5	3615.98	-0.0943722	0.0442469	-2.13286	0.0329366	0.232804
	CPEB4	384.714	0.186658	0.0875324	2.13244	0.0329708	0.232877
	IMPACT	839.302	-0.162095	0.0760487	-2.13146	0.0330514	0.233314
	MTMR6	415.024	0.184601	0.0866339	2.13082	0.0331038	0.233551
	KIFC1	2169.31	-0.115304	0.0541309	-2.1301	0.0331634	0.233839
	LNX2	3899.05	0.0988217	0.0464097	2.12933	0.0332268	0.234153
	RASL11B	474.669	-0.179249	0.0842001	-2.12884	0.0332671	0.23424
	SLC9A3R2	827.469	-0.155782	0.0731806	-2.12873	0.0332769	0.23424
	RIT1	1282.59	0.136113	0.0639664	2.12788	0.0333471	0.234497
	RTCA	952.877	0.14918	0.0701089	2.12783	0.0333512	0.234497
	COX11	637.682	0.168742	0.0793484	2.12659	0.0334539	0.235086
	ITGA9	411.191	0.183778	0.086468	2.12539	0.0335542	0.235358
	FRMD3	1805.13	-0.12022	0.0565684	-2.12522	0.0335684	0.235358
	XYLT1	22.2742	-0.118747	0.0558668	-2.12553	0.0335421	0.235358
	APEX1	4930.55	-0.0846973	0.0398421	-2.12582	0.033518	0.235358
	ADM2	746.478	0.160458	0.0755111	2.12495	0.0335906	0.23538
	PCTP	1093.59	-0.143529	0.0675565	-2.12458	0.0336216	0.235465
	GOT1	917.195	0.151378	0.0712608	2.12428	0.0336466	0.235508
	MT-ND4	158320	-0.0583695	0.0274847	-2.1237	0.0336949	0.235713
	RSU1	2208.03	0.112822	0.0531713	2.12186	0.0338492	0.236659
	PDE3A	16.5554	-0.105093	0.0495399	-2.12137	0.0338905	0.236814
	CIB2	415.34	-0.182948	0.0862903	-2.12015	0.0339938	0.237402
	PRMT2	1612.28	-0.125198	0.059065	-2.11966	0.0340343	0.237551
	GLI3	249.366	-0.194563	0.091832	-2.11868	0.0341171	0.237996
	C1orf85	1245.83	-0.143358	0.0676813	-2.11813	0.0341642	0.23819
	ZC3H15	2929.22	0.10501	0.049597	2.11726	0.0342378	0.23857
	FMR1	2148.42	0.118478	0.0559982	2.11575	0.0343662	0.238953
	ZNF574	907.917	-0.152623	0.0721245	-2.11611	0.0343353	0.238953
	SH3BP2	2637.47	-0.108008	0.0510426	-2.11603	0.0343421	0.238953
	MARCKSL1	5183.74	-0.0830294	0.0392443	-2.11571	0.0343698	0.238953
	MLF1	898.512	0.150918	0.0713503	2.11517	0.0344158	0.239138
	GLUL	3370.2	-0.0958559	0.0453525	-2.11357	0.0345516	0.239948
	PHLDB1	303.265	-0.190746	0.0902909	-2.11257	0.0346374	0.24041
	SERPINB9	242.07	0.194014	0.0918501	2.11229	0.0346615	0.240442
	ZNHIT2	257.371	0.193204	0.0914779	2.11203	0.0346836	0.240461
	PIP4K2B	2030.87	-0.1155	0.0546977	-2.11161	0.0347198	0.240578
	LRR1	687.66	0.16603	0.0786387	2.1113	0.0347463	0.240628
	WDR27	192.951	-0.195019	0.0924199	-2.11014	0.0348459	0.241183
	ALPL	4047.25	-0.0895456	0.0424564	-2.10912	0.0349342	0.241534
	FUT1	314.329	0.190267	0.0902125	2.1091	0.0349356	0.241534
	RGCC	391.898	-0.183316	0.0869677	-2.10786	0.0350431	0.242142
	RBMS3	530.781	-0.173059	0.0821297	-2.10714	0.0351053	0.242437
	RCN3	1621.62	-0.127499	0.0605145	-2.10691	0.0351254	0.242441
	PPP6R2	1568.8	-0.128645	0.0610747	-2.10635	0.0351741	0.242569
	LSS	3459.7	-0.0946143	0.0449208	-2.10625	0.0351829	0.242569
	DIP2C	1066.45	-0.144257	0.068534	-2.1049	0.0353001	0.243241
	EFNA5	2076.78	-0.113623	0.0540013	-2.10408	0.0353718	0.243601
	LMTK3	524.503	-0.174376	0.0829212	-2.10292	0.035473	0.244162
	ECH1	1049.47	-0.142878	0.0680292	-2.10024	0.0357076	0.245641
	RBM10	1811.81	-0.118565	0.0564879	-2.09895	0.0358214	0.246151
	GABPB1	836.699	0.154907	0.0737961	2.09912	0.035806	0.246151
	GULP1	136.218	0.191108	0.0910676	2.09853	0.0358583	0.246268
	LSM14A	5069.3	-0.0827449	0.039439	-2.09805	0.0359007	0.246423
	ZBTB8OS	423.534	0.183717	0.0876072	2.09705	0.0359894	0.246895
	MAN2B1	1916.42	-0.117094	0.0558576	-2.0963	0.0360554	0.247075
	RABGAP1L	1263.72	0.134177	0.0640038	2.09639	0.036048	0.247075
	PI15	284.626	-0.190362	0.0908441	-2.09548	0.0361286	0.247222
	TBPL1	1187.59	0.143231	0.0683449	2.09571	0.0361079	0.247222
	SUB1	3444.02	0.0981877	0.046859	2.09539	0.0361367	0.247222
	TMEM47	110.674	0.186107	0.0888688	2.09418	0.0362444	0.247823
	RUNX2	336.398	-0.18616	0.0889421	-2.09305	0.0363444	0.248348
	SEMA4A	554.237	-0.172283	0.0823191	-2.09287	0.0363612	0.248348
	KIF15	1274.78	-0.134069	0.0640718	-2.09247	0.0363961	0.24845
	DPP9	1985.19	0.116333	0.0556258	2.09135	0.0364968	0.249001
	DOCK8	67.8478	-0.168459	0.080563	-2.09102	0.0365263	0.249065
	G6PD	1987.75	-0.118483	0.056673	-2.09064	0.0365605	0.249161
	DDN	338.545	0.186933	0.0894446	2.08993	0.0366244	0.249323
	MRPL18	925.066	0.149157	0.0713639	2.09009	0.03661	0.249323
	ABI2	1020.81	-0.14518	0.0694959	-2.08904	0.0367038	0.249636
	MGEA5	3997.3	0.0944085	0.0451939	2.08897	0.0367106	0.249636
	CCT4	8985.34	0.0717489	0.0343541	2.08851	0.0367519	0.249693
	NDUFA9	1986.8	0.118081	0.0565465	2.08821	0.0367793	0.249693
	NLE1	1147.25	-0.142575	0.0682748	-2.08825	0.0367749	0.249693
	RANBP2	4312.83	0.0906047	0.0434158	2.08691	0.0368967	0.249944
	UBASH3B	247.06	0.191376	0.0916971	2.08704	0.0368841	0.249944
	TMEM70	808.625	0.156596	0.0750274	2.08719	0.0368711	0.249944
	ATG3	1463.99	0.13164	0.0630588	2.08757	0.0368364	0.249944
	GRHL1	2365.21	-0.108184	0.0518534	-2.08635	0.0369473	0.25015
	AKIRIN1	2107.67	0.114446	0.054866	2.08593	0.0369854	0.250271
	ZNF441	56.4593	0.160894	0.0771641	2.08509	0.0370609	0.250645
	TPM2	679.172	-0.163668	0.078523	-2.08433	0.0371298	0.250838
	MAML3	54.7407	-0.159878	0.0766987	-2.08449	0.0371155	0.250838
	ALKBH3	603.028	0.166972	0.0801199	2.08403	0.0371578	0.250891
	RGL3	35.8672	-0.140846	0.0676115	-2.08316	0.0372365	0.251286
	SELM	770.941	0.157779	0.0757625	2.08255	0.0372923	0.251526
	CUTA	1527.08	-0.125202	0.0601329	-2.0821	0.0373337	0.251615
	ACD	509.618	0.174423	0.0837783	2.08196	0.0373461	0.251615
	NDUFC1	696.991	0.159704	0.0767355	2.08123	0.0374131	0.251929
	C1QL4	88.1716	-0.176448	0.0848264	-2.08011	0.0375153	0.252475
	TEX30	440.981	0.178919	0.0860283	2.07977	0.0375469	0.252475
	FBXW5	2214.31	-0.109569	0.0526857	-2.07968	0.0375551	0.252475
	RICTOR	1090.8	0.139783	0.0672304	2.07917	0.0376016	0.252651
	BAK1	415.65	0.180353	0.0867843	2.07817	0.0376936	0.253
	AHRR	25.4636	0.123853	0.0596039	2.07794	0.0377147	0.253
	FAM117A	223.705	-0.191952	0.0923706	-2.07807	0.037703	0.253
	MID1IP1	734.999	-0.159486	0.0767602	-2.07772	0.0377352	0.253001
	HAGHL	322.991	-0.187149	0.0901615	-2.07571	0.0379206	0.254107
	PIK3R3	3806.86	0.0967513	0.0466166	2.07547	0.037943	0.25412
	MYBL1	944.381	0.148508	0.0716072	2.07392	0.0380863	0.254257
	NCKIPSD	923.734	-0.148949	0.0717969	-2.07459	0.0380246	0.254257
	PHLDA2	2881.8	0.10826	0.0521787	2.07479	0.0380056	0.254257
	TUBB3	5605.1	0.0831157	0.0400688	2.07432	0.0380492	0.254257
	GK5	1167.31	0.13763	0.0663553	2.07414	0.0380664	0.254257
	EFS	767.644	-0.155926	0.0751793	-2.07406	0.0380741	0.254257
	TMEM62	413.746	0.181339	0.0874543	2.07353	0.0381229	0.254365
	ACAD9	1770.16	-0.12063	0.0582492	-2.07093	0.0383655	0.255846
	FNIP2	676.799	0.163546	0.079019	2.06971	0.0384797	0.256469
	PSMB5	3031.87	0.100545	0.0486207	2.06795	0.0386443	0.257424
	RND3	4151.55	0.0953783	0.0461268	2.06774	0.0386644	0.257424
	TMEM63C	799.614	-0.153206	0.0741517	-2.06612	0.0388173	0.258165
	ARHGEF11	1920.45	-0.114565	0.0554449	-2.06628	0.0388017	0.258165
	AP2A2	1754.93	-0.120602	0.0584055	-2.0649	0.0389324	0.258654
	RAB21	1847.44	0.11699	0.0566519	2.06507	0.038916	0.258654
	SEC31A	7819.57	-0.0704797	0.0341374	-2.06459	0.0389621	0.258712
	PSMC3	5258.66	0.0814664	0.0394704	2.06399	0.039019	0.258949
	PBX2	1081.19	-0.140715	0.0681833	-2.06377	0.0390395	0.258949
	UNKL	904.767	0.147255	0.0714414	2.0612	0.0392837	0.26043
	KIN	265.625	0.188123	0.0913059	2.06036	0.0393644	0.260826
	FRS2	1223.57	0.147355	0.0715863	2.05842	0.0395499	0.261915
	USP25	3252.2	-0.0980181	0.0476264	-2.05806	0.0395841	0.262002
	SLC25A11	1445.6	-0.134019	0.0651576	-2.05685	0.0397008	0.262495
	ADORA2A	119.364	0.184065	0.0894805	2.05705	0.0396819	0.262495
	ZBTB2	659.836	0.160776	0.0782184	2.05547	0.0398337	0.263233
	KDELR2	14289.8	-0.0609352	0.0296591	-2.05452	0.0399253	0.263443
	BGN	311.337	-0.185389	0.0902365	-2.05448	0.0399292	0.263443
	ZFP36L1	5112.15	-0.0819467	0.0398854	-2.05455	0.0399222	0.263443
	RGS16	175.161	0.189379	0.0922095	2.05379	0.0399956	0.263601
	RCHY1	663.826	0.159946	0.0778783	2.0538	0.0399954	0.263601
	CPT1A	5699.07	0.077864	0.0379184	2.05346	0.0400276	0.263673
	CHORDC1	628.989	0.165635	0.0807155	2.05209	0.0401613	0.264413
	METTL8	2852.82	-0.0985743	0.0480444	-2.05173	0.0401956	0.264499
	H2AFX	1594.7	-0.122651	0.0598182	-2.0504	0.0403254	0.265174
	SLC15A2	136.464	-0.186775	0.0910991	-2.05024	0.0403409	0.265174
	MAP1LC3B	1314.63	0.129855	0.0633751	2.04899	0.040463	0.265835
	CHCHD7	660.201	0.161595	0.0788843	2.0485	0.0405107	0.266008
	OLFML2A	215.69	-0.188903	0.0922539	-2.04764	0.0405954	0.266423
	PTGR2	432.685	-0.176591	0.086291	-2.04646	0.0407116	0.267045
	KCNS3	144.47	0.18633	0.0911025	2.04528	0.0408272	0.267662
	CLEC16A	997.171	-0.143589	0.0702366	-2.04436	0.0409177	0.268113
	VPS13B	2108.32	-0.109532	0.0536019	-2.04344	0.0410088	0.268569
	SHROOM3	4858.62	-0.0878902	0.0430221	-2.04291	0.0410614	0.268772
	EGF	283.897	0.186253	0.0911805	2.04268	0.0410842	0.268779
	ZNF580	263.328	-0.186723	0.0914207	-2.04246	0.041106	0.26878
	UTP20	1860.23	-0.114957	0.056337	-2.04052	0.0412984	0.269521
	CLTB	1119.17	0.138706	0.0679786	2.04044	0.0413062	0.269521
	ALS2	860.861	0.148461	0.0727558	2.04053	0.0412973	0.269521
	HSPA14	1378.4	0.127603	0.0625196	2.04101	0.0412502	0.269521
	ALCAM	4704.09	0.0905033	0.0443728	2.03961	0.0413891	0.26992
	HSPE1	1585.18	0.12452	0.061071	2.03893	0.0414569	0.270221
	EXOSC1	455.277	0.176224	0.08645	2.03845	0.0415052	0.270393
	ATP5O	936.837	0.14444	0.0709129	2.03687	0.0416634	0.271282
	TOB1	936.078	-0.143848	0.0706804	-2.03519	0.0418317	0.272235
	UHMK1	6441.34	0.0764403	0.037567	2.03477	0.0418735	0.272364
	C20orf112	1551.86	-0.121624	0.0597817	-2.03448	0.0419036	0.272417
	SFT2D2	8301.82	-0.0683577	0.0336266	-2.03284	0.0420683	0.273059
	SERPINB8	70.6544	0.166351	0.0818193	2.03315	0.0420369	0.273059
	BMP8B	1356.52	-0.128256	0.0630906	-2.03288	0.0420647	0.273059
	MAPK8IP2	239.448	0.187242	0.0921339	2.03228	0.0421257	0.273146
	PCGF5	781.459	0.157623	0.0775524	2.03247	0.0421058	0.273146
	ALPP	15.9283	-0.0997617	0.0491317	-2.0305	0.0423062	0.274173
	COL6A1	2493.47	0.10531	0.0519112	2.02866	0.0424927	0.275238
	TES	2808.37	0.101481	0.0500458	2.02776	0.0425848	0.275691
	SNRPE	1341.04	0.13434	0.0662769	2.02695	0.0426671	0.275793
	LGALS8	2181.05	0.108191	0.0533723	2.0271	0.0426522	0.275793
	GNPTAB	1663.86	-0.118448	0.058435	-2.027	0.0426623	0.275793
	APH1B	76.581	-0.169455	0.083628	-2.0263	0.0427345	0.275963
	BET1L	1882.57	-0.115191	0.0568491	-2.02626	0.0427379	0.275963
	IMPA1	550.064	0.165958	0.0819306	2.02559	0.0428064	0.276262
	KIF11	2503.51	0.103714	0.0512108	2.02524	0.042843	0.276354
	TMEM208	549.916	0.164663	0.0813724	2.02358	0.0430135	0.27731
	RNF207	510.7	-0.167426	0.0827879	-2.02235	0.0431398	0.277835
	RTF1	2491.38	-0.104262	0.0515524	-2.02245	0.0431304	0.277835
	UCK2	3537.78	0.0966365	0.0478076	2.02136	0.0432424	0.278352
	AKIRIN2	3475.65	0.092784	0.0459122	2.0209	0.04329	0.278514
	AZGP1	12784.2	-0.0658478	0.0326253	-2.01831	0.0435595	0.280102
	WHAMM	362.373	0.177726	0.0880712	2.01798	0.0435937	0.280178
	MOB1A	4711.43	-0.0890296	0.0441355	-2.01719	0.0436758	0.280415
	ECHDC2	887.823	-0.14478	0.071766	-2.01738	0.0436554	0.280415
	PLA2G4C	32.4189	0.129127	0.0640443	2.01621	0.0437781	0.280813
	SOX12	1079.17	-0.137043	0.0679724	-2.01616	0.0437831	0.280813
	DBNDD1	1974.41	0.114208	0.0566616	2.01561	0.0438403	0.281035
	TMEM254	547.687	-0.166294	0.0825303	-2.01494	0.0439105	0.28134
	MTR	2453.24	-0.102854	0.051077	-2.01371	0.0440401	0.282025
	HS2ST1	1076.92	-0.13811	0.0685928	-2.01348	0.044064	0.282032
	FAM83G	3416.43	0.0910888	0.0452601	2.01256	0.0441606	0.282471
	CCNK	1481.61	0.124454	0.0618436	2.0124	0.0441781	0.282471
	RHOV	2807.01	-0.0979514	0.0486843	-2.01197	0.0442229	0.282612
	DENND3	602.368	0.160906	0.0800152	2.01095	0.0443312	0.283159
	METTL16	836.586	0.147148	0.0732014	2.01019	0.0444114	0.283525
	NOL7	916.069	0.142541	0.0709235	2.00978	0.0444543	0.283605
	NPAT	1101.16	0.135399	0.0673746	2.00964	0.0444696	0.283605
	PITX1	1501.39	0.130254	0.0648316	2.00911	0.0445257	0.283817
	SYNGR2	4242.67	0.091818	0.0457351	2.00761	0.0446852	0.284687
	PLEKHB2	5054.51	0.0834945	0.0416074	2.00673	0.0447789	0.284992
	CENPF	12618.5	-0.0631169	0.0314517	-2.00679	0.0447718	0.284992
	DLC1	929.818	-0.142734	0.0712101	-2.00441	0.0450262	0.285554
	MID1	2322.66	-0.109957	0.0548581	-2.00439	0.0450282	0.285554
	GEMIN2	318.345	0.180566	0.0900278	2.00567	0.0448915	0.285554
	PFKL	3480.79	-0.0944847	0.0471323	-2.00467	0.0449985	0.285554
	HPDL	834.805	-0.146058	0.0728404	-2.00517	0.0449446	0.285554
	DVL3	3615.12	-0.0890557	0.0444202	-2.00485	0.0449796	0.285554
	MTIF2	1156.03	0.132531	0.0661002	2.005	0.0449635	0.285554
	DDB1	16310.3	-0.056309	0.0281001	-2.00387	0.0450839	0.285615
	TBX18	166.806	-0.184797	0.0922154	-2.00397	0.0450729	0.285615
	ZNF598	2429	0.102879	0.0513522	2.0034	0.0451341	0.285642
	TMEM160	363.924	0.180935	0.0903136	2.00341	0.0451337	0.285642
	CERCAM	1182.89	-0.132501	0.0661805	-2.00212	0.0452719	0.285882
	CNFN	149.772	-0.183099	0.0914451	-2.00228	0.0452544	0.285882
	PPID	901.817	0.143884	0.0718556	2.00241	0.0452412	0.285882
	PSMB9	86.8404	0.171261	0.0855551	2.00176	0.0453101	0.285882
	MTUS1	1595.56	-0.119245	0.0595678	-2.00183	0.0453028	0.285882
	C6orf57	269.1	-0.182401	0.0911078	-2.00204	0.0452806	0.285882
	PDXK	3529.11	-0.0910165	0.0454747	-2.00148	0.0453411	0.285932
	BTN2A1	440.083	0.171326	0.0856634	1.99999	0.0455015	0.286653
	LAMB2	5968.86	-0.0747901	0.0373937	-2.00007	0.0454925	0.286653
	RAI1	4075.03	-0.0876788	0.043857	-1.9992	0.0455869	0.287045
	ZCCHC11	3277.87	-0.0956032	0.0478482	-1.99805	0.0457112	0.287536
	WNK1	8103.18	-0.068533	0.0342989	-1.99811	0.0457044	0.287536
	EIF2AK1	13507	-0.0593884	0.0297282	-1.99771	0.0457477	0.287543
	TFAP2C	2147.28	0.11261	0.0563722	1.99761	0.0457587	0.287543
	ATAD2	9051.9	0.0678356	0.0339644	1.99726	0.0457972	0.28764
	CIRH1A	2193.4	0.107336	0.0537492	1.99697	0.0458282	0.287689
	USP13	689.695	-0.155665	0.0779962	-1.9958	0.0459554	0.28783
	SLC35D2	408.9	-0.175319	0.087846	-1.99575	0.0459608	0.28783
	FANCL	812.71	-0.148554	0.0744243	-1.99604	0.0459296	0.28783
	TCP11L2	124.03	0.18002	0.0902038	1.9957	0.0459666	0.28783
	NIN	2768.95	-0.102044	0.0511311	-1.99573	0.0459636	0.28783
	NSUN5	883.506	0.14483	0.0725858	1.99529	0.0460108	0.287962
	DPF2	1518.4	0.120926	0.0606226	1.99473	0.0460721	0.288115
	IL13RA1	840.838	-0.145079	0.0727343	-1.99464	0.0460816	0.288115
	IFI30	1653.55	0.119065	0.0597283	1.99344	0.0462131	0.288356
	RBMS1	1562.4	-0.121354	0.0608701	-1.99365	0.0461903	0.288356
	IFITM10	31.3565	0.128087	0.0642383	1.99394	0.0461583	0.288356
	KRT10	559.843	0.162677	0.0816038	1.99349	0.0462074	0.288356
	LTBP4	735.792	-0.155912	0.0782385	-1.99277	0.0462862	0.288522
	PPAP2C	2544.87	-0.100149	0.0502535	-1.99287	0.046276	0.288522
	DAAM2	99.995	-0.169204	0.0849334	-1.99219	0.0463497	0.288773
	NAB1	985.194	-0.140762	0.0707114	-1.99065	0.0465195	0.289686
	TSPYL4	290.821	-0.180101	0.0905301	-1.98941	0.0466561	0.29039
	SLC27A5	335.773	-0.177003	0.0889884	-1.98906	0.046695	0.290487
	CYSTM1	778.562	0.151022	0.0759538	1.98834	0.0467743	0.290834
	RPP30	554.898	0.166223	0.083662	1.98684	0.0469399	0.291718
[truncated: 14,184 more rows]

## Sheet: FCIBC02->RUX_Vs_Vehicle
Treatment	id	baseMean	log2FoldChange	lfcSE	stat	pvalue	padj
15uM RUX	MMP7	5865.99	-1.50716	0.0408525	-36.8928	6.03782e-298	7.59558e-294
	MX1	1852.15	-2.37238	0.0709163	-33.4532	2.31099e-245	1.45361e-241
	EMP1	33151.6	-0.640365	0.0234313	-27.3295	1.89337e-164	7.93952e-161
	IFI6	614.909	-2.8411	0.108621	-26.156	8.41468e-151	2.64642e-147
	SAT1	41824.8	0.598869	0.0232572	25.7498	3.23812e-146	8.1471e-143
	CTGF	4366.3	-1.10823	0.0436342	-25.3983	2.6318e-142	5.518e-139
	RDH10	14898.7	-0.703066	0.0287663	-24.4406	6.33812e-132	1.13905e-128
	KLK14	1923.86	-1.47085	0.0609463	-24.1336	1.11013e-128	1.74569e-125
	ENC1	2810.64	-1.20275	0.0520642	-23.1013	4.48757e-118	6.27263e-115
	SERPINA3	1592.91	-1.56724	0.0680537	-23.0294	2.36438e-117	2.97439e-114
	STAT1	2846.84	-1.23902	0.0542755	-22.8283	2.39857e-115	2.7431e-112
	IRF9	609.764	-2.29816	0.101123	-22.7263	2.46011e-114	2.57901e-111
	MDK	1774.77	-1.47353	0.0657172	-22.4223	2.38354e-111	2.30654e-108
	DDX60	979.807	-1.85146	0.0841974	-21.9895	3.62735e-107	3.25943e-104
	IFITM3	5390.15	-0.891074	0.0407479	-21.868	5.24504e-106	4.39884e-103
	LTF	15100.8	-0.61851	0.0286581	-21.5824	2.62831e-103	2.06651e-100
	RPL12	21960.6	-0.587249	0.029251	-20.0762	1.19165e-89	8.81819e-87
	THBS1	23608.3	-0.557096	0.0277866	-20.0491	2.05548e-89	1.43655e-86
	SYT12	3443.02	0.948559	0.0495785	19.1325	1.35457e-81	8.96868e-79
	H1F0	12077.1	-0.59093	0.0309339	-19.103	2.38487e-81	1.50009e-78
	ALPL	2913.7	-0.962421	0.050531	-19.0461	7.07434e-81	4.23787e-78
	IFITM1	573.463	-1.84285	0.100387	-18.3575	2.87738e-75	1.64534e-72
	ANKRD1	1502.42	-1.23448	0.0676315	-18.253	1.96003e-74	1.07205e-71
	KRT5	69836.6	-0.431958	0.0237283	-18.2043	4.76785e-74	2.49915e-71
	IVNS1ABP	7435.62	0.631657	0.0352566	17.916	8.85034e-72	4.45349e-69
	NES	2799.92	-0.96317	0.0539372	-17.8572	2.53876e-71	1.22837e-68
	PARP9	646.047	-1.7721	0.0997632	-17.7631	1.36471e-70	6.35856e-68
	KRT16	19574.6	-0.5557	0.0318866	-17.4274	5.11394e-68	2.29762e-65
	SLC34A2	5431.93	-0.647621	0.0391885	-16.5258	2.392e-61	1.03763e-58
	OAS3	983.496	-1.43592	0.0869013	-16.5236	2.4819e-61	1.04074e-58
	PTX3	1055.48	1.24209	0.0773337	16.0615	4.75274e-58	1.92869e-55
	DTX3L	1116.8	-1.20827	0.0753077	-16.0445	6.24679e-58	2.45577e-55
	HEBP2	16163.7	-0.463338	0.0293002	-15.8135	2.51167e-56	9.57479e-54
	PAM	3444.84	-0.723229	0.0467495	-15.4703	5.50464e-54	2.03672e-51
	ADAMTS16	1090.84	-1.19475	0.0778018	-15.3563	3.21409e-53	1.12315e-50
	ISG15	927.352	-1.27784	0.0832091	-15.3569	3.18357e-53	1.12315e-50
	HSPB1	6064.66	-0.619889	0.0406424	-15.2523	1.5902e-52	5.40666e-50
	MSN	7618.77	-0.528588	0.0347627	-15.2056	3.24516e-52	1.07432e-49
	IGFBP3	6498.68	-0.576967	0.0382949	-15.0664	2.69244e-51	8.68484e-49
	ITPR2	6523.97	-0.609569	0.0405319	-15.0393	4.06125e-51	1.27726e-48
	DDIT4	2142.71	0.856272	0.0569855	15.0262	4.949e-51	1.5185e-48
	PROM2	3791.46	0.713574	0.0479326	14.887	4.00151e-50	1.19855e-47
	SULF2	6990.43	-0.539236	0.0363955	-14.816	1.15406e-49	3.3763e-47
	IFIT1	252.572	-1.92479	0.130625	-14.7352	3.82798e-49	1.09446e-46
	VIM	2439.6	-0.817837	0.0559729	-14.6113	2.37934e-48	6.65158e-46
	TGFBI	346.905	-1.71226	0.117324	-14.5943	3.05302e-48	8.34935e-46
	PTPRF	47961.3	-0.319761	0.0221477	-14.4377	2.99857e-47	8.02596e-45
	SCRN1	3117.77	-0.708846	0.0491064	-14.4349	3.12084e-47	8.17919e-45
	HIVEP3	953.163	-1.13452	0.0796518	-14.2435	4.92192e-46	1.26363e-43
	PARP14	922.398	-1.24063	0.0879124	-14.1121	3.19899e-45	8.04867e-43
	C3	444.297	1.51722	0.107575	14.1038	3.59644e-45	8.87121e-43
	KLK6	3921.02	-0.690642	0.0492272	-14.0297	1.02627e-44	2.48279e-42
	CYBRD1	3673.21	0.6316	0.046234	13.661	1.73696e-42	4.12283e-40
	OAS1	151.34	-1.89761	0.139256	-13.6268	2.77498e-42	6.46466e-40
	GLS	7860.82	-0.479603	0.0352359	-13.6112	3.43492e-42	7.85659e-40
	HELZ2	1365.62	-0.940626	0.0693849	-13.5566	7.23741e-42	1.62583e-39
	OASL	702.48	-1.1977	0.0897633	-13.3429	1.3035e-40	2.87684e-38
	CAST	4805.09	-0.551933	0.0419725	-13.1499	1.70427e-39	3.6965e-37
	AARD	10578.3	-0.411607	0.0315673	-13.039	7.33828e-39	1.56467e-36
	EIF2AK2	3784.87	-0.610707	0.0472834	-12.9159	3.66134e-38	7.67662e-36
	PFN2	3300.1	-0.607908	0.0474907	-12.8006	1.62747e-37	3.35632e-35
	IFIT3	248.973	-1.61677	0.126356	-12.7953	1.74108e-37	3.5327e-35
	MAP1B	1220.75	-0.990899	0.0779551	-12.7111	5.12804e-37	1.02398e-34
	IFIT2	490.89	-1.31754	0.103692	-12.7063	5.45768e-37	1.07277e-34
	SAMD9	269.056	-1.57401	0.124178	-12.6754	8.09089e-37	1.5659e-34
	ADAR	15557.4	-0.377669	0.0301819	-12.5131	6.33006e-36	1.20655e-33
	KRT4	5992.1	-0.485018	0.0391744	-12.381	3.31253e-35	6.21965e-33
	PLD1	692.989	1.1158	0.0904645	12.3341	5.93143e-35	1.09731e-32
	OAS2	84.9726	-1.72061	0.139541	-12.3305	6.20352e-35	1.13102e-32
	GABRP	25293.7	-0.302183	0.0245722	-12.2978	9.30759e-35	1.64915e-32
	MKI67	10766.5	-0.403075	0.0327759	-12.2979	9.29619e-35	1.64915e-32
	ADAMTS15	425.411	-1.34562	0.110404	-12.1882	3.59165e-34	6.27542e-32
	NFKB2	1351.45	0.813439	0.068607	11.8565	1.99138e-32	3.43172e-30
	CTSB	11992.6	-0.368404	0.0312015	-11.8072	3.58087e-32	6.08747e-30
	NRP1	3002.97	-0.587419	0.0503685	-11.6624	1.9828e-31	3.32582e-29
	FSTL1	2788.38	-0.590191	0.0507242	-11.6353	2.72632e-31	4.51277e-29
	IRF7	284.424	-1.41035	0.121296	-11.6273	2.99306e-31	4.88996e-29
	SLC5A6	3782.53	0.543618	0.0468201	11.6108	3.6322e-31	5.85809e-29
	ARL4C	2837.97	-0.586951	0.0509137	-11.5284	9.49426e-31	1.51187e-28
	PDE4B	1602.67	0.778207	0.0678415	11.471	1.84605e-30	2.90291e-28
	RHOV	3360.38	0.555061	0.0489302	11.3439	7.94774e-30	1.23435e-27
	SLC7A5	11196.8	0.36397	0.0320974	11.3395	8.35868e-30	1.28234e-27
	KIAA1244	5798.14	-0.45576	0.0409308	-11.1349	8.48483e-29	1.28601e-26
	HMCN1	3767.43	-0.517193	0.0465888	-11.1012	1.2373e-28	1.85301e-26
	PTPN14	6530.35	-0.438485	0.039625	-11.0659	1.83672e-28	2.71834e-26
	MCL1	15200.1	-0.308321	0.0278898	-11.055	2.07437e-28	3.03438e-26
	EPS8	2117.1	0.636748	0.0577767	11.0208	3.03211e-28	4.38436e-26
	S100A2	3918.76	-0.484496	0.0440295	-11.0039	3.65915e-28	5.23092e-26
	DDX58	1619.03	-0.733379	0.0667144	-10.9928	4.13762e-28	5.84846e-26
	LTBP2	489.617	-1.12519	0.103385	-10.8835	1.38205e-27	1.93181e-25
	KRT19	23861.7	-0.316134	0.0292121	-10.822	2.70723e-27	3.74252e-25
	CYP1B1	12787.7	0.321665	0.029817	10.788	3.92442e-27	5.36622e-25
	COL4A2	2677.1	-0.555653	0.0516532	-10.7574	5.46981e-27	7.39895e-25
	PDLIM5	4005.23	0.502643	0.0472995	10.6268	2.23605e-26	2.9925e-24
	HERC6	680.676	-0.960431	0.0906608	-10.5937	3.1882e-26	4.22185e-24
	KLK5	12634	-0.324446	0.0306423	-10.5882	3.38118e-26	4.43076e-24
	SH3KBP1	1785.47	-0.651317	0.0625676	-10.4098	2.23658e-25	2.90063e-23
	JUN	3808.82	-0.467226	0.0453495	-10.3028	6.84475e-25	8.78642e-23
	HNRNPU	17506	-0.283164	0.0275683	-10.2713	9.48684e-25	1.2055e-22
	MUC1	591.417	-0.979648	0.0958584	-10.2197	1.61775e-24	2.03513e-22
	MFGE8	7164.31	0.421888	0.0417278	10.1105	4.96471e-24	6.18377e-22
	NDRG1	1343.85	-0.69695	0.069034	-10.0958	5.76845e-24	7.11442e-22
	KCNN4	1433.16	0.762272	0.0763671	9.98168	1.83328e-23	2.23909e-21
	MT-ND2	38673.6	0.258668	0.0259564	9.96547	2.15847e-23	2.61092e-21
	IFFO2	4340.48	-0.424485	0.0430093	-9.86962	5.63784e-23	6.75467e-21
	LITAF	5690.09	0.375273	0.0383253	9.79179	1.22117e-22	1.44928e-20
	LTBP1	1901.64	-0.621077	0.063606	-9.76443	1.60003e-22	1.88116e-20
	ESYT2	9740.4	0.315863	0.0324569	9.73177	2.20725e-22	2.57104e-20
	CMPK2	164.409	-1.31348	0.135463	-9.69626	3.12746e-22	3.60949e-20
	FMO2	804.776	-0.817143	0.0844875	-9.67176	3.97469e-22	4.54561e-20
	PC	2253.27	0.54309	0.0564322	9.62376	6.34684e-22	7.19309e-20
	DSG2	4877.16	-0.392481	0.0409229	-9.59073	8.74603e-22	9.82367e-20
	FAM20C	2256.91	-0.533363	0.0556454	-9.58504	9.24231e-22	1.02892e-19
	EXT1	1925.76	0.582812	0.0608954	9.5707	1.06188e-21	1.17179e-19
	PSMC3	4130.05	-0.416959	0.0436295	-9.55682	1.21436e-21	1.32841e-19
	EPB41L2	4970.51	-0.389778	0.0408805	-9.53456	1.5052e-21	1.63236e-19
	SYNE2	5950.63	-0.367865	0.0391549	-9.39513	5.71472e-21	6.14455e-19
	AHCYL1	7534.35	0.362027	0.0385638	9.38775	6.12947e-21	6.53463e-19
	ITPR3	3889.11	-0.413372	0.0441383	-9.36539	7.5772e-21	8.01018e-19
	XAF1	70.287	-1.30362	0.13929	-9.35907	8.04437e-21	8.43318e-19
	FBN1	1435.67	-0.623627	0.0667605	-9.34126	9.51908e-21	9.8967e-19
	KDR	728.133	0.818296	0.0876099	9.34023	9.6129e-21	9.91232e-19
	AHNAK2	3415.71	-0.46628	0.049947	-9.33551	1.00509e-20	1.02797e-18
	S100A16	4712.62	0.402117	0.0431247	9.32453	1.11477e-20	1.13095e-18
	ADAM15	9970.95	0.312176	0.0336007	9.29074	1.53221e-20	1.54202e-18
	KRT8	18525.1	-0.273418	0.0296196	-9.231	2.68111e-20	2.67686e-18
	TNIP1	2476.3	0.506115	0.0551017	9.1851	4.11142e-20	4.07258e-18
	ATPIF1	1566.8	0.607507	0.0661541	9.1832	4.18461e-20	4.11269e-18
	RUNX2	226.345	-1.17085	0.127776	-9.16326	5.03507e-20	4.91017e-18
	IFI44	160.933	-1.24325	0.135718	-9.16057	5.16245e-20	4.99566e-18
	FAT1	9398.29	-0.316627	0.0345886	-9.15409	5.48171e-20	5.26412e-18
	FADS1	1586	-0.588594	0.0643353	-9.14885	5.75404e-20	5.48377e-18
	NEDD9	758.322	-0.79295	0.0868053	-9.13481	6.552e-20	6.19731e-18
	SUGP2	2181.53	0.527836	0.0579114	9.11454	7.90021e-20	7.41676e-18
	LYNX1	383.778	-0.990625	0.109798	-9.02229	1.84206e-19	1.71653e-17
	SLC5A3	1635.16	-0.569195	0.0630957	-9.02113	1.86155e-19	1.72193e-17
	GNG7	300.916	1.06694	0.118355	9.01479	1.97248e-19	1.81122e-17
	CDC42BPG	2393.84	0.488705	0.0542599	9.00674	2.12265e-19	1.935e-17
	RIPK4	3713.45	-0.402834	0.0449456	-8.96272	3.16771e-19	2.86689e-17
	PLK2	1859.33	-0.533512	0.0596694	-8.94113	3.85228e-19	3.46155e-17
	TACSTD2	11324.3	-0.314622	0.0352945	-8.91422	4.91279e-19	4.38318e-17
	ZNF704	467.96	-0.91948	0.103313	-8.89992	5.58855e-19	4.95099e-17
	PIEZO1	4396.62	-0.396757	0.0447583	-8.86444	7.68912e-19	6.76427e-17
	DUSP4	289.147	1.06211	0.119893	8.85881	8.08726e-19	7.06512e-17
	EPPK1	1570.5	-0.574822	0.0650004	-8.84337	9.28749e-19	8.0577e-17
	APCDD1	1166.01	-0.644839	0.0729954	-8.83398	1.01019e-18	8.70426e-17
	CXCL1	442.108	0.934526	0.105866	8.82741	1.07128e-18	9.16784e-17
	KLK7	1765.07	-0.560658	0.0635641	-8.82036	1.14097e-18	9.69824e-17
	PPL	1893.71	-0.529067	0.0600248	-8.81413	1.20615e-18	1.01835e-16
	LAD1	3611.57	-0.3992	0.0454011	-8.79274	1.45955e-18	1.22407e-16
	ULK2	862.782	-0.716977	0.0817407	-8.77136	1.7652e-18	1.47061e-16
	CNN3	4854.48	-0.378926	0.0432285	-8.76564	1.85712e-18	1.53701e-16
	MYH9	27156.8	-0.212843	0.0243935	-8.72539	2.65271e-18	2.18112e-16
	TUBB2B	324.406	-1.01107	0.116162	-8.70397	3.20469e-18	2.61786e-16
	FLNB	16829.6	-0.253931	0.0292521	-8.68076	3.9314e-18	3.19078e-16
	FKBP1A	3018.03	-0.439489	0.0508892	-8.63619	5.81211e-18	4.68694e-16
	FBLN1	1432.23	-0.579422	0.0672343	-8.61795	6.81645e-18	5.46184e-16
	AGRN	12285.8	-0.272481	0.0316774	-8.60173	7.85227e-18	6.252e-16
	AMOTL2	3937.52	-0.399214	0.0464177	-8.60046	7.93984e-18	6.28196e-16
	RSAD2	95.9632	-1.20461	0.140952	-8.54628	1.27122e-17	9.99498e-16
	NEBL	1863.66	-0.504622	0.0595199	-8.47822	2.28674e-17	1.78678e-15
	IGFBP5	624.499	-0.812965	0.0960767	-8.46162	2.63684e-17	2.04762e-15
	CHML	1604.46	-0.541311	0.0640376	-8.45302	2.83852e-17	2.19071e-15
	HOXC12	1892.75	-0.508111	0.0601628	-8.4456	3.02475e-17	2.32021e-15
	ERVMER34-1	808.625	-0.71074	0.0843627	-8.42482	3.61319e-17	2.75479e-15
	HR	1528.72	-0.550752	0.0654896	-8.40976	4.10842e-17	3.11349e-15
	IL32	286.851	1.00529	0.119614	8.40442	4.29989e-17	3.23908e-15
	HSPA4L	1228.21	0.624704	0.0745856	8.37566	5.49157e-17	4.11214e-15
	IFIH1	752.199	-0.730152	0.087187	-8.37456	5.54322e-17	4.12625e-15
	DSG3	2565.28	-0.437339	0.052228	-8.37365	5.58605e-17	4.13368e-15
	ANKH	2664.36	-0.436965	0.0523994	-8.33913	7.4837e-17	5.50555e-15
	TRIM22	85.6688	-1.17013	0.140555	-8.32509	8.42626e-17	6.16293e-15
	UGCG	2307.08	0.483621	0.0582716	8.29943	1.04611e-16	7.60699e-15
	HMGN2	3140.9	-0.4226	0.050973	-8.29066	1.12621e-16	8.14239e-15
	BCAM	315.681	-0.97863	0.118082	-8.28771	1.15448e-16	8.29907e-15
	SFRP1	6280.35	0.304124	0.0369026	8.24126	1.70401e-16	1.21679e-14
	PHGDH	47377.8	0.207934	0.0252326	8.2407	1.71201e-16	1.21679e-14
	HES2	650.444	-0.75784	0.0920142	-8.23612	1.77886e-16	1.25719e-14
	CXCL5	228.987	1.04079	0.126483	8.22866	1.89315e-16	1.33049e-14
	TUBB6	6511.09	-0.300205	0.0364976	-8.22535	1.94622e-16	1.36019e-14
	OPLAH	2444.17	-0.440635	0.05364	-8.21467	2.12745e-16	1.47863e-14
	EPAS1	885.456	0.686411	0.0837072	8.20014	2.40111e-16	1.65967e-14
	ELF3	6682.36	-0.314991	0.0384785	-8.18614	2.69739e-16	1.85427e-14
	SIRT2	1285.12	0.573351	0.0700644	8.1832	2.76395e-16	1.8897e-14
	PEA15	8854.78	-0.276859	0.0338781	-8.17221	3.02779e-16	2.0589e-14
	CCNG1	1146.42	0.60676	0.0743181	8.16436	3.23142e-16	2.18555e-14
	TET3	3102.03	-0.396258	0.0485534	-8.16128	3.31505e-16	2.23012e-14
	GAPDH	69276.1	-0.187459	0.0229717	-8.16043	3.33838e-16	2.23388e-14
	MUC5B	4159.11	-0.389982	0.0478327	-8.15304	3.54878e-16	2.3621e-14
	PTPRK	3891.33	-0.378336	0.0465412	-8.12905	4.32667e-16	2.86471e-14
	PGBD5	4561.09	-0.338807	0.0417911	-8.10717	5.18141e-16	3.41268e-14
	MAP2K3	3126.08	0.397949	0.0491843	8.09098	5.91882e-16	3.87806e-14
	PPAP2C	2106.13	-0.458006	0.0566874	-8.07951	6.50265e-16	4.23852e-14
	CELSR2	4437.21	-0.34084	0.0422148	-8.07395	6.80572e-16	4.4132e-14
	CPNE1	4666.38	0.332272	0.0411886	8.06709	7.19926e-16	4.64445e-14
	RPL10A	9260.67	-0.26571	0.0332238	-7.99758	1.26884e-15	8.14389e-14
	PLCG2	2486.53	0.423441	0.0529787	7.99267	1.32044e-15	8.43203e-14
	PALLD	2328.63	-0.46723	0.0587124	-7.95794	1.74922e-15	1.11137e-13
	HNRNPA2B1	28956.3	-0.195678	0.0246197	-7.948	1.89549e-15	1.19826e-13
	CKB	1366.03	-0.579814	0.0729913	-7.94361	1.96385e-15	1.23526e-13
	AVPI1	355.816	0.890474	0.112475	7.91708	2.43152e-15	1.52182e-13
	SORBS2	4640.14	0.332595	0.0420852	7.90291	2.72473e-15	1.69689e-13
	NPNT	1482.56	0.516041	0.0655	7.8785	3.31342e-15	2.05334e-13
	APP	36383.8	-0.181631	0.023137	-7.85021	4.15343e-15	2.56128e-13
	S100A14	1629.98	0.515823	0.0657443	7.84589	4.29897e-15	2.6381e-13
	RAB11FIP1	12246.6	-0.238383	0.0303925	-7.84349	4.38195e-15	2.67597e-13
	EEF1D	11368.6	-0.27228	0.0348403	-7.8151	5.49179e-15	3.33752e-13
	SLC6A9	1781.96	-0.473571	0.0607628	-7.79377	6.5039e-15	3.93361e-13
	KCNIP3	677.324	0.7	0.0898838	7.78783	6.81678e-15	4.10311e-13
	DYNC1H1	18261.3	-0.246262	0.0316965	-7.76938	7.88739e-15	4.72492e-13
	MAP7	3375.62	0.368559	0.0477286	7.72197	1.14547e-14	6.82941e-13
	TPM2	518.376	-0.7779	0.100826	-7.71525	1.20748e-14	7.16511e-13
	CD44	11915.2	0.235268	0.030619	7.68373	1.54526e-14	9.12646e-13
	DDR1	6514.89	0.291012	0.0378826	7.68194	1.56697e-14	9.21143e-13
	DYRK2	2564.64	-0.404834	0.0527137	-7.67987	1.59254e-14	9.31822e-13
	TAX1BP3	2036.53	-0.448681	0.0584806	-7.6723	1.68945e-14	9.83951e-13
	GPC4	2752.64	-0.390253	0.0508877	-7.66891	1.73468e-14	1.00564e-12
	SDC1	5814.87	-0.301027	0.0394252	-7.63539	2.25133e-14	1.29702e-12
	RNF145	1748.32	0.472077	0.0618305	7.63502	2.25793e-14	1.29702e-12
	EFR3B	82.7676	1.07354	0.140772	7.6261	2.4197e-14	1.38363e-12
	APOL6	2247.95	-0.41995	0.0553668	-7.58488	3.32806e-14	1.89444e-12
	GUCY1A3	7902.15	-0.259668	0.0342759	-7.57582	3.56866e-14	2.01317e-12
	HSP90B1	9717.3	-0.240106	0.031693	-7.57599	3.56402e-14	2.01317e-12
	CHST3	969.307	-0.598729	0.079073	-7.57185	3.67954e-14	2.05727e-12
	PRPS2	2540.35	-0.416673	0.0550288	-7.5719	3.67794e-14	2.05727e-12
	PDGFB	533.954	-0.744429	0.0984139	-7.56427	3.90048e-14	2.17115e-12
	RAD21	21536.3	-0.210792	0.0279165	-7.55081	4.32566e-14	2.39722e-12
	PTPRJ	1669.4	0.477492	0.0632533	7.54888	4.39006e-14	2.42224e-12
	MACF1	12932.9	-0.243263	0.0323003	-7.5313	5.02376e-14	2.75978e-12
	RBM3	4208.85	-0.332684	0.0448287	-7.42123	1.16038e-13	6.34675e-12
	COL4A1	843.836	-0.619991	0.0836103	-7.41524	1.21404e-13	6.61151e-12
	PIM1	996.461	-0.569556	0.0770056	-7.39629	1.40038e-13	7.59344e-12
	FBLN2	3088.8	-0.376539	0.0509932	-7.38412	1.53467e-13	8.2859e-12
	RGCC	289.41	-0.87617	0.118707	-7.38094	1.57174e-13	8.44977e-12
	ICOSLG	1083.59	0.5641	0.0764965	7.3742	1.6533e-13	8.85041e-12
	TNFAIP2	219.225	0.943818	0.128191	7.36258	1.80389e-13	9.61564e-12
	PLSCR1	2005.32	-0.435259	0.0592173	-7.3502	1.97916e-13	1.05054e-11
	DSC3	6793.69	-0.263708	0.0359579	-7.3338	2.23718e-13	1.18251e-11
	GAL	1041.6	-0.57847	0.0790608	-7.31677	2.54003e-13	1.33697e-11
	PADI2	2481.69	0.395535	0.0540835	7.31341	2.60439e-13	1.36513e-11
	FBL	5415.17	-0.284949	0.0390424	-7.29846	2.9109e-13	1.51946e-11
	SMOC1	482.094	0.750046	0.102981	7.28333	3.25668e-13	1.69294e-11
	FHL2	599.578	-0.701498	0.0965538	-7.26536	3.72054e-13	1.9261e-11
	FAM78B	403.492	-0.783851	0.107969	-7.25994	3.87255e-13	1.99659e-11
	MYBL2	5220.18	-0.290958	0.0401693	-7.24329	4.37939e-13	2.24869e-11
	CERS2	7768.52	-0.251754	0.0347995	-7.23442	4.6753e-13	2.39086e-11
	DDX60L	193.825	-0.945444	0.130741	-7.23142	4.77965e-13	2.43433e-11
	RCAN1	2869.3	0.365094	0.0505175	7.22708	4.93494e-13	2.50329e-11
	RCN1	2006.08	-0.418437	0.0579248	-7.22381	5.05521e-13	2.554e-11
	KCNC3	607.972	-0.681448	0.0944538	-7.21462	5.40849e-13	2.72155e-11
	CDKN2B	1726.17	-0.450418	0.0624717	-7.20996	5.59689e-13	2.80513e-11
	SLC22A23	1420.17	-0.481234	0.0667663	-7.20773	5.68927e-13	2.84012e-11
	DNM1	1112.74	-0.552224	0.0767907	-7.19128	6.41851e-13	3.1915e-11
	SEPT5	358.997	-0.803533	0.112297	-7.1554	8.34322e-13	4.13219e-11
	KTN1	6232.67	-0.263519	0.0368649	-7.14826	8.78862e-13	4.33572e-11
	TGOLN2	3744.71	-0.321201	0.0449795	-7.14106	9.26142e-13	4.55112e-11
	TPR	10684.1	0.225136	0.0315759	7.13	1.00369e-12	4.91302e-11
	SH3BP2	2221.37	-0.409811	0.0580201	-7.06327	1.62635e-12	7.93003e-11
	MTCH1	3872.43	0.345522	0.0489567	7.05771	1.69267e-12	8.22153e-11
	IFI44L	31.4715	-0.860503	0.122078	-7.04881	1.80451e-12	8.73105e-11
	QPRT	1793.8	0.428952	0.0608988	7.04368	1.87222e-12	9.02396e-11
	ATP5G1	726.894	-0.620025	0.0880852	-7.03893	1.93723e-12	9.26627e-11
	PPP2R3A	1167.92	-0.514897	0.0731482	-7.0391	1.93491e-12	9.26627e-11
	ANXA2	30670	-0.175938	0.025052	-7.02291	2.17289e-12	1.03542e-10
	FGFR3	213.243	-0.90353	0.128893	-7.0099	2.38493e-12	1.13216e-10
	SLC7A6	2682.46	0.364082	0.0520703	6.99213	2.70751e-12	1.28047e-10
	NSD1	2801.31	-0.37627	0.0538679	-6.98505	2.84762e-12	1.34169e-10
	KRT80	1923.32	-0.414515	0.059417	-6.97636	3.02923e-12	1.4181e-10
	S100A11	8648.27	-0.249529	0.0357686	-6.97622	3.03235e-12	1.4181e-10
	EIF4A2	8673.61	0.245611	0.0352434	6.96898	3.19244e-12	1.48744e-10
	PEG10	3051.32	0.339549	0.0487834	6.96033	3.39473e-12	1.57586e-10
	ASAP1	1681.75	-0.441464	0.0634514	-6.95751	3.46337e-12	1.60181e-10
	ZNF532	1327	-0.499939	0.0720231	-6.94137	3.88326e-12	1.78943e-10
	DNMT3A	704.3	-0.616801	0.0888749	-6.9401	3.91824e-12	1.79896e-10
	NUP210	4426.39	-0.294331	0.0425053	-6.92457	4.37311e-12	2.0005e-10
	ENO1	43018.2	-0.158712	0.0229376	-6.91928	4.53936e-12	2.06903e-10
	SPTBN1	9299.02	0.230933	0.0334809	6.89744	5.29485e-12	2.40467e-10
	RAB31	2029	-0.406226	0.0589014	-6.89672	5.32176e-12	2.40819e-10
	PTP4A1	3799.39	0.309227	0.0448539	6.89408	5.42148e-12	2.44452e-10
	TOB1	1136.18	0.509829	0.0739776	6.89167	5.51398e-12	2.47735e-10
	VGLL3	2406.93	-0.387491	0.0562336	-6.89074	5.55026e-12	2.48478e-10
	BST2	2205.08	-0.398625	0.0578538	-6.89022	5.57058e-12	2.48503e-10
	HYI	445.292	-0.717866	0.104262	-6.88518	5.77127e-12	2.56546e-10
	LPHN1	8912.64	-0.226307	0.0328728	-6.88433	5.80601e-12	2.57182e-10
	MACC1	1712.5	0.424932	0.0618779	6.86726	6.54455e-12	2.88879e-10
	COL15A1	95.4015	0.967755	0.140947	6.86609	6.59833e-12	2.90234e-10
	SORBS1	519.157	-0.686872	0.100075	-6.86359	6.7151e-12	2.94342e-10
	MAP3K6	1016.37	-0.522633	0.0762569	-6.85359	7.20207e-12	3.1459e-10
	NOTCH1	9780.94	-0.219993	0.0321159	-6.84997	7.38658e-12	3.21534e-10
	SPTBN2	4214.73	-0.2962	0.0436302	-6.78888	1.1301e-11	4.88544e-10
	PTPRR	276.114	0.816013	0.120193	6.7892	1.1276e-11	4.88544e-10
	PCSK1N	598.681	0.652995	0.0962872	6.78175	1.18733e-11	5.11526e-10
	IFIT5	369.79	-0.748993	0.110475	-6.77976	1.20375e-11	5.16832e-10
	MICALL1	6996.37	-0.246509	0.0364018	-6.77189	1.27107e-11	5.43879e-10
	PLTP	2073.9	-0.408419	0.060365	-6.76582	1.32559e-11	5.65286e-10
	MLF2	4413.37	-0.295343	0.043737	-6.75271	1.45105e-11	6.16698e-10
	PTGES	2141.86	0.380508	0.0563567	6.75178	1.46041e-11	6.18584e-10
	SH3RF1	1362.77	-0.460003	0.0682983	-6.7352	1.63702e-11	6.91062e-10
	NISCH	2321.79	0.399191	0.0592749	6.73457	1.64411e-11	6.91737e-10
	KHDRBS3	1088.3	-0.500521	0.074389	-6.72843	1.71502e-11	7.19166e-10
	RHOB	1359.6	0.462878	0.0688311	6.72484	1.75784e-11	7.34672e-10
	LAMA4	1674.72	-0.430824	0.0642198	-6.70858	1.96524e-11	8.18635e-10
	INPPL1	5101.1	0.292284	0.0436077	6.70258	2.04767e-11	8.50154e-10
	NCL	16363	-0.186452	0.027835	-6.69848	2.10592e-11	8.70121e-10
	OBSL1	813.546	-0.559873	0.0835853	-6.69823	2.10959e-11	8.70121e-10
	FGF2	783.761	-0.576252	0.0860761	-6.69469	2.16132e-11	8.88544e-10
	RIMS3	3311.81	-0.314273	0.0469853	-6.68876	2.25076e-11	9.2134e-10
	C11orf86	149.601	0.91082	0.136178	6.68843	2.25574e-11	9.2134e-10
	RAD51B	216.334	0.851583	0.127709	6.66813	2.59085e-11	1.05479e-09
	ATP6V1A	2903.41	0.353664	0.0531989	6.64796	2.9718e-11	1.20598e-09
	SEMA7A	364.144	0.7618	0.114734	6.63971	3.14308e-11	1.27138e-09
	PLXND1	561.406	-0.642718	0.0968868	-6.6337	3.27378e-11	1.31734e-09
	ZP3	637.448	0.607378	0.0915619	6.63353	3.27763e-11	1.31734e-09
	GLUL	2900.01	-0.328799	0.0496938	-6.61649	3.67822e-11	1.47363e-09
	LOXL2	372.34	-0.733673	0.111003	-6.60946	3.85723e-11	1.54044e-09
	PABPC1	78190.7	-0.148695	0.0225017	-6.60818	3.8907e-11	1.54889e-09
	TMEM2	1996.3	-0.422547	0.0640696	-6.59513	4.2487e-11	1.68608e-09
	HDGF	19302.4	-0.182076	0.027644	-6.58646	4.50451e-11	1.77639e-09
	FADS2	14588.8	-0.189011	0.0286951	-6.58688	4.49165e-11	1.77639e-09
	NUP35	2290.29	0.360428	0.0547901	6.57835	4.75713e-11	1.87015e-09
	SLC3A2	4157.87	0.299497	0.0455416	6.57633	4.82191e-11	1.88384e-09
	FAM127A	1759.21	0.410431	0.0624078	6.5766	4.81328e-11	1.88384e-09
	MOK	784.065	0.557757	0.084929	6.56733	5.12249e-11	1.99508e-09
	WDR62	1273.18	0.459456	0.070005	6.56319	5.26692e-11	2.04499e-09
	ATP1B1	11767.3	-0.202687	0.0309211	-6.55497	5.56525e-11	2.15418e-09
	PPP1CB	10455.1	-0.212539	0.0325341	-6.53281	6.45459e-11	2.49076e-09
	COTL1	4740.9	-0.278513	0.0427604	-6.51335	7.3492e-11	2.82731e-09
	RHBDD2	1407.43	-0.436572	0.067042	-6.51192	7.41975e-11	2.84573e-09
	PTGFRN	3470.97	0.313762	0.0481861	6.51146	7.44233e-11	2.84573e-09
	CENPF	11163.8	-0.208056	0.0320512	-6.49137	8.50592e-11	3.24256e-09
	RELB	558.527	0.626081	0.096541	6.48514	8.86512e-11	3.36928e-09
	LEPREL1	1580.83	0.417945	0.0645964	6.4701	9.79405e-11	3.71112e-09
	ADAMTSL3	138.244	-0.889327	0.137523	-6.46673	1.00146e-10	3.78329e-09
	NR4A1	343.828	0.734656	0.113791	6.45618	1.07381e-10	4.04446e-09
	GSN	2156.63	-0.372203	0.057726	-6.44776	1.13517e-10	4.26281e-09
	ZNF185	541.357	-0.632956	0.098226	-6.44388	1.16458e-10	4.36025e-09
	RUNX1	2200.51	-0.359671	0.0558226	-6.44312	1.17045e-10	4.36921e-09
	HDAC5	1282.87	0.452165	0.070371	6.42545	1.31484e-10	4.8937e-09
	IRAK1	9538	-0.205462	0.0320255	-6.41557	1.40293e-10	5.20614e-09
	RBM6	2045.93	0.366655	0.0572228	6.40749	1.47936e-10	5.47364e-09
	ATG2B	954.798	0.510701	0.0797408	6.40451	1.50854e-10	5.56524e-09
	CCNI	6686.37	-0.235846	0.0368429	-6.40138	1.53975e-10	5.66374e-09
	BPNT1	2445.01	0.344034	0.0537521	6.40038	1.54993e-10	5.68457e-09
	IL1R1	188.927	-0.845713	0.132256	-6.39451	1.61058e-10	5.88985e-09
	OPA1	2338.77	0.355112	0.0555959	6.38738	1.68753e-10	6.15337e-09
	LRAT	290.062	0.768339	0.120472	6.37771	1.79755e-10	6.53562e-09
	FUBP1	3447.6	-0.304358	0.0477406	-6.37524	1.82676e-10	6.62265e-09
	UCP2	1409.84	-0.454609	0.0715387	-6.35472	2.08808e-10	7.54829e-09
	SMG5	7374.85	-0.237622	0.0374147	-6.35104	2.13869e-10	7.70909e-09
	FAM83G	2746.11	-0.325103	0.0512021	-6.34941	2.16144e-10	7.76883e-09
	S100P	1257.46	0.453143	0.0713731	6.34894	2.16807e-10	7.77047e-09
	EML2	845.495	0.542284	0.0854719	6.34459	2.23015e-10	7.97025e-09
	SFPQ	9322.36	-0.208684	0.0329336	-6.33651	2.35034e-10	8.376e-09
	CYTH3	6792.52	-0.235135	0.0371141	-6.33546	2.36641e-10	8.40943e-09
	IGFBP4	313.092	-0.738637	0.117341	-6.29478	3.07838e-10	1.09087e-08
	EVA1A	363.688	-0.710354	0.113051	-6.2835	3.31044e-10	1.16981e-08
	RABGAP1L	1318.16	0.43073	0.0686148	6.27751	3.44031e-10	1.2123e-08
	INTS3	3382.3	0.311167	0.0496443	6.26792	3.65906e-10	1.28507e-08
	ROCK2	3878.89	0.282446	0.0450647	6.26757	3.66726e-10	1.28507e-08
	IARS	10186.3	0.199906	0.0319435	6.25811	3.89667e-10	1.36167e-08
	CRIP1	1686.9	-0.411761	0.0658758	-6.25057	4.08966e-10	1.42515e-08
	TRIOBP	1007.83	-0.488347	0.0781416	-6.24952	4.11718e-10	1.43078e-08
	SLC25A1	1794.87	-0.395436	0.0633193	-6.24511	4.23503e-10	1.46768e-08
	BACH2	140.48	-0.853317	0.136899	-6.23318	4.5706e-10	1.57962e-08
	NANOS1	370.618	-0.699492	0.112402	-6.22312	4.87377e-10	1.67978e-08
	RPS9	8935.86	-0.224983	0.0361923	-6.21631	5.08997e-10	1.7495e-08
	SMCHD1	4756.71	0.256302	0.0412869	6.20782	5.37244e-10	1.84156e-08
	TPM1	11313	-0.188596	0.0303842	-6.20706	5.39866e-10	1.84552e-08
	PXDC1	470.403	-0.631095	0.101898	-6.1934	5.88801e-10	2.00735e-08
	FRMD3	1527.89	-0.405238	0.0654513	-6.19143	5.962e-10	2.02708e-08
	TTC3	12623.9	0.197314	0.0319014	6.18511	6.20593e-10	2.10433e-08
	BRD4	8134.01	-0.210173	0.033997	-6.18212	6.3248e-10	2.13887e-08
	AHNAK	30411.7	-0.182675	0.0296779	-6.15525	7.4961e-10	2.52818e-08
	PGAP1	1165.89	0.450375	0.0732284	6.15028	7.73478e-10	2.6017e-08
	LPGAT1	2332.8	-0.337756	0.0549533	-6.14623	7.93476e-10	2.66185e-08
	TUB	400.587	-0.663976	0.108098	-6.14237	8.1297e-10	2.71999e-08
	KIRREL	7451.64	-0.214114	0.0349153	-6.1324	8.65653e-10	2.87361e-08
	HLA-A	1254.19	0.431894	0.0704285	6.13238	8.65737e-10	2.87361e-08
	POLR2G	1939.02	0.363961	0.0593485	6.13261	8.64508e-10	2.87361e-08
	LDHA	11303.6	-0.204882	0.0334569	-6.12375	9.13981e-10	3.02576e-08
	S100A1	4858.63	0.275553	0.0450153	6.12131	9.28082e-10	3.06437e-08
	PLEKHS1	402.398	-0.658871	0.107655	-6.1202	9.34583e-10	3.07776e-08
	ATG16L2	382.628	0.71253	0.116474	6.1175	9.50552e-10	3.12218e-08
	LEPRE1	1409.62	0.419985	0.068673	6.11572	9.61218e-10	3.14899e-08
	YARS	3056.71	0.296354	0.0485216	6.10767	1.01099e-09	3.30343e-08
	H1FX	3244.61	-0.321214	0.05265	-6.10093	1.05454e-09	3.43682e-08
	MED13L	3431.21	-0.292422	0.0479746	-6.09534	1.09202e-09	3.54976e-08
	CNTNAP2	603.569	-0.59242	0.0973085	-6.08806	1.1429e-09	3.70558e-08
	ABCD3	2050.45	0.35153	0.0578121	6.08055	1.1977e-09	3.87327e-08
	PTPRS	3911.33	-0.269538	0.0444496	-6.0639	1.32857e-09	4.28549e-08
	AKAP8	2443.13	-0.33468	0.0552614	-6.0563	1.39292e-09	4.48158e-08
	C9orf16	1306.59	0.419329	0.0692723	6.05334	1.4187e-09	4.55287e-08
	SERF2	8358.66	0.209174	0.0345856	6.04801	1.46645e-09	4.69412e-08
	ID1	727.39	-0.528368	0.0875307	-6.03637	1.57615e-09	5.03249e-08
	TMEM98	239.862	-0.751398	0.124495	-6.03556	1.58408e-09	5.04499e-08
	S1PR3	717.72	-0.536227	0.0888947	-6.03216	1.61784e-09	5.1395e-08
	ODC1	7048.93	-0.216127	0.0358721	-6.02494	1.69172e-09	5.36067e-08
	CCNL1	1443.06	0.406389	0.0675618	6.01508	1.79798e-09	5.68305e-08
	RYR1	207.139	-0.773961	0.128762	-6.0108	1.84615e-09	5.82069e-08
	WASF2	5116.74	-0.250266	0.0416473	-6.00918	1.86465e-09	5.86433e-08
	FAM43A	132.329	-0.830092	0.138201	-6.00643	1.89656e-09	5.9498e-08
	SLC2A6	871.161	0.485296	0.0811004	5.98389	2.17874e-09	6.80154e-08
	ZNF692	752.024	0.535889	0.0895555	5.98388	2.17887e-09	6.80154e-08
	MGST1	7347.82	0.210572	0.0351942	5.98316	2.18854e-09	6.81482e-08
	RASL11B	376.258	-0.658062	0.11007	-5.9786	2.25059e-09	6.99072e-08
	NMNAT1	281.925	0.721462	0.120705	5.97709	2.27163e-09	7.03869e-08
	SLC25A5	10494.9	-0.188144	0.0315008	-5.97268	2.3339e-09	7.21387e-08
	ZNF787	1588	-0.390914	0.0655313	-5.9653	2.44184e-09	7.52901e-08
	CHAF1B	1440.48	-0.400424	0.0673747	-5.94324	2.79443e-09	8.59511e-08
	TOX2	284.536	-0.705609	0.11889	-5.93496	2.93918e-09	9.01827e-08
	ARHGEF9	1838.35	0.354321	0.0598512	5.92004	3.21869e-09	9.85187e-08
	L1CAM	1127.44	-0.43209	0.0730957	-5.9113	3.39424e-09	1.0364e-07
	HSPA8	26039.2	-0.147217	0.0249527	-5.89982	3.63893e-09	1.10842e-07
	TSPAN8	142.997	0.80793	0.137217	5.88797	3.90969e-09	1.18802e-07
	TUBB3	4636.59	-0.250066	0.042603	-5.86967	4.36652e-09	1.32363e-07
	FAM189B	3626.75	0.266961	0.0455379	5.8624	4.56212e-09	1.3796e-07
	IFI27	38.3974	-0.74406	0.126948	-5.86114	4.59708e-09	1.38684e-07
	SAMD12	935.98	0.466809	0.0796856	5.85813	4.6812e-09	1.40884e-07
	GPX7	61.1974	-0.811252	0.138609	-5.85282	4.83302e-09	1.45106e-07
	SLC20A1	2367.85	0.319983	0.0547853	5.84068	5.19881e-09	1.55717e-07
	PMP22	2877.35	-0.300585	0.0514999	-5.83661	5.32736e-09	1.59188e-07
	LURAP1L	732.89	-0.518248	0.0888999	-5.82957	5.55703e-09	1.65657e-07
	SV2B	261.403	0.710534	0.121919	5.82792	5.61236e-09	1.66911e-07
	LMNB2	9969.97	-0.183433	0.0315006	-5.82315	5.77486e-09	1.71339e-07
	SOX4	3198.52	0.283187	0.0486583	5.81991	5.88784e-09	1.7428e-07
	DHX9	11504.1	-0.177401	0.0304929	-5.81778	5.96352e-09	1.76106e-07
	NFATC2	230.405	-0.746257	0.128418	-5.81117	6.20365e-09	1.82768e-07
	SLIT2	220.3	-0.73448	0.126603	-5.80143	6.57508e-09	1.93258e-07
	SSFA2	3051.91	0.28293	0.048806	5.79702	6.75024e-09	1.97944e-07
	FZD8	133.114	0.798282	0.137895	5.78906	7.07814e-09	2.07077e-07
	CGN	3655.29	-0.274498	0.0474876	-5.7804	7.45216e-09	2.17513e-07
	EFNB2	1831.5	-0.348754	0.0603923	-5.77481	7.70408e-09	2.24346e-07
	MT2A	2096.43	-0.341398	0.0591253	-5.77416	7.734e-09	2.24697e-07
	PLEC	18252.9	-0.183687	0.0318939	-5.75931	8.44591e-09	2.44815e-07
	PPDPF	2795.92	-0.304918	0.0530171	-5.75131	8.85558e-09	2.56099e-07
	SERPINH1	3936.7	-0.257872	0.0448951	-5.74388	9.25324e-09	2.66986e-07
	SMARCA2	3554.88	0.268602	0.0468209	5.7368	9.6484e-09	2.7775e-07
	PEBP1	6397.24	0.210835	0.0367938	5.73016	1.00335e-08	2.88176e-07
	ST3GAL6	722.834	0.509542	0.0889432	5.72885	1.01114e-08	2.89754e-07
	BOC	151.978	-0.792589	0.138595	-5.71875	1.0731e-08	3.0681e-07
	SLC4A11	921.309	-0.477887	0.0836525	-5.71276	1.11156e-08	3.17083e-07
	B3GAT3	1142.66	0.417428	0.0731018	5.71022	1.12827e-08	3.21123e-07
	SRRM2	17265.7	0.163204	0.0286093	5.70458	1.16629e-08	3.31194e-07
	SOCS3	67.1517	-0.792809	0.139343	-5.68961	1.27333e-08	3.60775e-07
	C15orf48	293.451	0.670389	0.118054	5.67864	1.35768e-08	3.83811e-07
	LOXL1	532.326	-0.563247	0.0992844	-5.67306	1.40269e-08	3.95646e-07
	DAP	2466.98	0.300228	0.0529488	5.67016	1.42662e-08	4.01497e-07
	PANX2	1050.95	-0.425743	0.0751139	-5.66797	1.44499e-08	4.05759e-07
	MTSS1L	1821.12	-0.343033	0.0605281	-5.66734	1.45034e-08	4.06352e-07
	ACTR1B	1902.79	-0.334976	0.0592184	-5.65661	1.54389e-08	4.31604e-07
	ALCAM	4604.6	0.235718	0.0416823	5.6551	1.55752e-08	4.34448e-07
	SP110	96.0734	-0.796009	0.140921	-5.64863	1.61733e-08	4.50132e-07
	ENO2	683.242	-0.517641	0.0916586	-5.64749	1.62811e-08	4.52132e-07
	TCEA3	674.717	-0.51037	0.0904026	-5.64552	1.64686e-08	4.56333e-07
	CTD-3193O13.9	313.855	-0.652268	0.115725	-5.63637	1.73671e-08	4.80173e-07
	HERC5	352.217	-0.629599	0.111714	-5.63582	1.74227e-08	4.80653e-07
	PAQR7	189.04	-0.733607	0.130839	-5.60696	2.05917e-08	5.66835e-07
	PYGL	1723.71	0.349909	0.062453	5.60275	2.10975e-08	5.79491e-07
	OPHN1	581.236	0.537288	0.0960611	5.59319	2.22931e-08	6.10995e-07
	MT1X	503.203	-0.557667	0.0997537	-5.59044	2.26494e-08	6.19413e-07
	HNRNPD	6407.34	-0.208172	0.037261	-5.58687	2.31197e-08	6.30902e-07
	LAMP3	62.9133	-0.775915	0.139115	-5.5775	2.43994e-08	6.64381e-07
	DNAJC10	3000.56	0.273304	0.0490502	5.57192	2.51946e-08	6.84554e-07
	ACSS2	923.261	0.447763	0.0804535	5.56549	2.61413e-08	7.07222e-07
	BCL2L2	663.044	-0.50786	0.0912456	-5.56586	2.60866e-08	7.07222e-07
	PARP10	2179.79	-0.327963	0.0590059	-5.55814	2.72665e-08	7.36078e-07
	BTG1	3691.89	0.264245	0.0475529	5.55687	2.74655e-08	7.39864e-07
	ACVR1	2659.42	-0.291566	0.0524985	-5.5538	2.79522e-08	7.51364e-07
	SP100	260.852	-0.689575	0.124408	-5.54283	2.97615e-08	7.96595e-07
	SFXN3	544.631	0.545903	0.0984815	5.5432	2.96986e-08	7.96595e-07
	PLSCR4	835.123	0.461995	0.0834239	5.53792	3.06092e-08	8.17546e-07
	ZSWIM8	2879.53	0.281992	0.0509338	5.53644	3.08684e-08	8.20983e-07
	DPM3	542.894	0.555996	0.100422	5.53659	3.08419e-08	8.20983e-07
	ARNT2	135.34	-0.759447	0.137476	-5.52422	3.30955e-08	8.77702e-07
	BAIAP2L2	952.07	0.435039	0.0787547	5.52398	3.31406e-08	8.77702e-07
	RPL22	3971.74	0.243216	0.0440414	5.52244	3.34326e-08	8.83575e-07
	CREBZF	2235.41	0.330525	0.0599457	5.51374	3.51282e-08	9.2583e-07
	POLR2A	6700.18	-0.198891	0.0360736	-5.51349	3.51786e-08	9.2583e-07
	APOO	1216.76	0.392601	0.0715423	5.48767	4.07263e-08	1.0696e-06
	C1orf63	655.104	0.50026	0.0912862	5.48013	4.2502e-08	1.11391e-06
	SDC2	3468.13	-0.261386	0.0477365	-5.4756	4.36033e-08	1.14039e-06
	ATP9A	3326.75	-0.271645	0.0496399	-5.47231	4.44206e-08	1.15936e-06
	TPM3	15346.4	-0.157603	0.0288505	-5.46276	4.68788e-08	1.22098e-06
	B3GALNT1	246.66	-0.673001	0.12339	-5.45425	4.91796e-08	1.27826e-06
	NHSL1	1933.53	-0.319971	0.0586863	-5.45223	4.97428e-08	1.29023e-06
	TNIK	216.861	0.697468	0.128181	5.44128	5.28985e-08	1.36926e-06
	ADRM1	2929.14	-0.277332	0.050988	-5.43916	5.35328e-08	1.38284e-06
	FOS	85.6061	-0.763911	0.14096	-5.41933	5.98212e-08	1.54211e-06
	FOXA1	685.753	0.483916	0.0893978	5.41307	6.19547e-08	1.59385e-06
	BDH1	705.475	0.478879	0.088537	5.4088	6.34478e-08	1.62892e-06
	MOGS	2495.39	0.293746	0.0544165	5.39811	6.73461e-08	1.72549e-06
	UCHL1	6033.06	-0.217683	0.0403555	-5.39413	6.88565e-08	1.7606e-06
	SERPINB5	1614.66	-0.342525	0.063553	-5.38959	7.06193e-08	1.80201e-06
	ELOVL6	6166.73	-0.206193	0.0383385	-5.37821	7.52287e-08	1.91574e-06
	CEP55	2819.76	-0.278266	0.0518026	-5.37165	7.80178e-08	1.98276e-06
	SRD5A1	620.797	0.494624	0.0922896	5.35948	8.34625e-08	2.11685e-06
	UST	98.4227	0.753758	0.140705	5.35703	8.46026e-08	2.14145e-06
	RSPO1	242.629	-0.667871	0.124829	-5.35027	8.78234e-08	2.21851e-06
	ZNF207	6028.09	-0.2033	0.0380362	-5.34492	9.04573e-08	2.28047e-06
	SLC39A8	2058.08	0.316208	0.0591715	5.34393	9.09512e-08	2.28833e-06
	ZNF641	1105.77	-0.395628	0.0741038	-5.33883	9.35481e-08	2.34897e-06
	RNF213	2795.76	-0.312421	0.0585485	-5.33612	9.49587e-08	2.37964e-06
	NAV2	2106.56	-0.304872	0.0571847	-5.33136	9.74799e-08	2.43797e-06
	COL6A1	1993.98	-0.317381	0.0596189	-5.32351	1.01786e-07	2.54062e-06
	ERBB2	2340.81	0.29283	0.0550279	5.32147	1.02932e-07	2.56412e-06
	PROM1	6671.36	-0.19196	0.0360852	-5.31964	1.03972e-07	2.58491e-06
	MRPS21	2559.05	0.279683	0.0525838	5.31881	1.04451e-07	2.59169e-06
	RAB2A	5352.31	0.208705	0.0392707	5.31452	1.0694e-07	2.64823e-06
	TSPAN31	292.74	-0.626363	0.117877	-5.31371	1.07418e-07	2.65485e-06
	DNAJB6	2790.96	-0.271079	0.0510584	-5.30919	1.10112e-07	2.71611e-06
	SET	14306.6	-0.150809	0.0284219	-5.30607	1.12016e-07	2.75765e-06
	GPER1	156.531	-0.714194	0.134686	-5.30266	1.1413e-07	2.80421e-06
	DSC2	3503.63	-0.249142	0.046997	-5.30122	1.15031e-07	2.82085e-06
	CDC42SE1	4108.37	0.22942	0.043281	5.3007	1.15357e-07	2.82333e-06
	ADAMTS5	722.642	-0.465501	0.0879444	-5.29313	1.20243e-07	2.9372e-06
	VPS8	854.62	0.434417	0.0821253	5.28968	1.22532e-07	2.98732e-06
	ECH1	1199.12	0.377276	0.0713312	5.28908	1.22931e-07	2.99124e-06
	GUK1	3287.85	0.256364	0.0485711	5.27813	1.30511e-07	3.16955e-06
	PSIP1	2838.57	-0.26784	0.0507753	-5.27501	1.3275e-07	3.21771e-06
	ALX4	787.054	-0.444517	0.0844197	-5.26556	1.39762e-07	3.38117e-06
	GYLTL1B	1243.82	-0.372121	0.0707958	-5.25626	1.47018e-07	3.54988e-06
	EPB41L4B	1137.39	-0.393934	0.0751393	-5.24272	1.58231e-07	3.8133e-06
	ACAD11	265.813	0.63662	0.121467	5.2411	1.59618e-07	3.83938e-06
	KRT23	2228.48	-0.295802	0.0564517	-5.23992	1.60646e-07	3.85674e-06
	TACC2	1882.47	0.310912	0.0593586	5.23785	1.62454e-07	3.89272e-06
	ALMS1	1350.98	-0.369477	0.0706535	-5.22943	1.70035e-07	4.06117e-06
	PKIB	100.537	-0.736255	0.140793	-5.22933	1.7013e-07	4.06117e-06
	C22orf29	1181.21	-0.374624	0.0716512	-5.22844	1.70946e-07	4.07291e-06
	HEYL	98.822	-0.735492	0.140719	-5.22668	1.72581e-07	4.10411e-06
	CDH3	4527.59	-0.217119	0.0416196	-5.21676	1.8208e-07	4.32183e-06
	NPR3	5314.66	0.220846	0.0423576	5.21385	1.84959e-07	4.38189e-06
	HSPB8	622.571	-0.500486	0.0960193	-5.21234	1.86469e-07	4.40936e-06
	SMC4	8258.65	-0.187735	0.0360639	-5.20561	1.93358e-07	4.56369e-06
	HLA-C	3882.1	-0.236531	0.0454747	-5.20138	1.97817e-07	4.6535e-06
	HOOK2	3508.97	0.256711	0.0493553	5.2013	1.97903e-07	4.6535e-06
	FIBP	1944.02	0.305566	0.0587744	5.19897	2.00396e-07	4.70331e-06
	COBL	2377.38	-0.280678	0.0540077	-5.197	2.02532e-07	4.7446e-06
	GPM6B	561.972	0.498062	0.095875	5.19491	2.04815e-07	4.78916e-06
	PTMA	28001.3	-0.253241	0.0488265	-5.18655	2.1423e-07	5.00001e-06
	PDE1C	113.18	-0.722886	0.139598	-5.17833	2.23881e-07	5.21559e-06
	FAM63B	1175.74	0.372132	0.0718793	5.17718	2.25269e-07	5.23823e-06
	ZC3HAV1	2687.05	-0.265975	0.0513785	-5.17677	2.25762e-07	5.24001e-06
	CLN6	2092.77	-0.29815	0.0576107	-5.17525	2.27603e-07	5.27301e-06
	NIPAL2	306.856	-0.629296	0.121616	-5.17444	2.28592e-07	5.28618e-06
	CAT	968.326	0.401567	0.0777513	5.16476	2.40752e-07	5.55717e-06
	SASH1	1660.29	-0.328936	0.0637009	-5.16376	2.42044e-07	5.57677e-06
	UBR4	8927.14	-0.191663	0.0371655	-5.15702	2.50911e-07	5.77049e-06
	SPEN	5340.01	-0.202214	0.0392345	-5.15399	2.54996e-07	5.85374e-06
	KRT6A	834.231	-0.430737	0.0836162	-5.15136	2.58603e-07	5.92573e-06
	ADCY7	1369.83	-0.350551	0.0680647	-5.15026	2.60123e-07	5.94972e-06
	NRP2	64.9153	0.71625	0.139264	5.14313	2.70203e-07	6.16907e-06
	LGALS9	229.526	-0.647864	0.126004	-5.14161	2.72401e-07	6.20797e-06
	RTP4	879.493	-0.428107	0.0833567	-5.13584	2.80879e-07	6.38962e-06
	REC8	51.6082	-0.698112	0.136216	-5.12505	2.97466e-07	6.75472e-06
	CANX	20248.9	-0.133679	0.0260884	-5.12406	2.99026e-07	6.77791e-06
	LPIN1	5108.7	-0.20938	0.0408781	-5.12206	3.02223e-07	6.83807e-06
	HLA-F	204.869	-0.658562	0.12886	-5.11066	3.21029e-07	7.24844e-06
	PDE5A	402.391	0.559233	0.109431	5.11038	3.21513e-07	7.24844e-06
	SMYD2	1747.09	-0.312501	0.0612649	-5.10082	3.38192e-07	7.61084e-06
	FBXW5	1925.31	-0.309696	0.0607516	-5.09775	3.4371e-07	7.7212e-06
	NFS1	674.912	0.456153	0.0894959	5.09691	3.45246e-07	7.74188e-06
	PMEPA1	375.892	-0.558098	0.109572	-5.09342	3.51655e-07	7.87157e-06
	ARID1A	4737.23	-0.211883	0.0416182	-5.09111	3.55967e-07	7.95393e-06
	ILF3	13835.7	-0.150046	0.0294775	-5.09021	3.57676e-07	7.97794e-06
	PITHD1	1149.31	0.374229	0.0735585	5.0875	3.62806e-07	8.07804e-06
	SLC38A10	1095.14	-0.379768	0.0747155	-5.08286	3.71789e-07	8.26343e-06
	CITED4	3600.52	0.443885	0.0873561	5.08133	3.74804e-07	8.30112e-06
	TMEM123	16655.5	-0.153636	0.0302335	-5.08165	3.74163e-07	8.30112e-06
	RPL10	15517.6	-0.164026	0.032298	-5.07851	3.8041e-07	8.40273e-06
	ALDH6A1	360.506	0.56524	0.111304	5.07835	3.80728e-07	8.40273e-06
	DPP7	1743.92	-0.319007	0.0628575	-5.07508	3.87324e-07	8.53334e-06
	OAT	7235.17	0.177856	0.0350799	5.07003	3.97746e-07	8.74762e-06
	LRPPRC	8527.03	-0.173319	0.0341886	-5.06949	3.98888e-07	8.75743e-06
	SLC12A2	1961.26	0.304527	0.0602158	5.05726	4.25319e-07	9.32145e-06
	CIB2	337.415	-0.580226	0.114827	-5.05304	4.34826e-07	9.51324e-06
	PACS1	2382.01	-0.290173	0.0574465	-5.05119	4.3907e-07	9.58941e-06
	FKBP14	951.854	0.398343	0.0788989	5.04878	4.44645e-07	9.69434e-06
	VLDLR	2185.46	-0.283652	0.0562368	-5.04388	4.56186e-07	9.92876e-06
	LGR4	8029.78	-0.173633	0.0344944	-5.03366	4.81191e-07	1.04549e-05
	OXCT1	804.112	0.424705	0.0844055	5.03173	4.86079e-07	1.05429e-05
	DUSP16	1469.33	0.339073	0.0674162	5.02954	4.91664e-07	1.06457e-05
	SLC1A5	6285.96	-0.191822	0.0382207	-5.01878	5.20001e-07	1.12399e-05
	BHLHE40	918.475	0.397386	0.0793598	5.00739	5.51717e-07	1.1905e-05
	ZHX1	1937.18	0.299547	0.0598643	5.00377	5.62205e-07	1.21105e-05
	MYO1C	6520.92	-0.186497	0.0372905	-5.00118	5.6981e-07	1.22533e-05
	GPRC5A	6339.62	0.210476	0.0421375	4.99498	5.88433e-07	1.26322e-05
	CCDC85B	1331.1	0.343856	0.0689988	4.98351	6.24415e-07	1.33818e-05
	CCL5	67.3283	-0.697191	0.13991	-4.98313	6.25643e-07	1.33854e-05
	NOP56	4705.78	-0.228135	0.0458307	-4.97779	6.4316e-07	1.37368e-05
	PLD3	2003.74	0.287177	0.0577047	4.97667	6.46886e-07	1.37929e-05
	GPSM1	828.389	-0.418932	0.0842373	-4.97324	6.58431e-07	1.40153e-05
	ID2	2018.15	-0.292948	0.0589261	-4.97144	6.64565e-07	1.4122e-05
	LHPP	499.944	0.49544	0.0996692	4.97084	6.66636e-07	1.41421e-05
	PDE10A	2094.9	0.296251	0.0596356	4.9677	6.7753e-07	1.4349e-05
	TUBB4B	8410.38	-0.166331	0.0335845	-4.9526	7.32301e-07	1.54829e-05
	GCAT	376.384	0.542357	0.109579	4.94947	7.44141e-07	1.57069e-05
	DEPTOR	221.648	-0.625679	0.126452	-4.94794	7.50028e-07	1.58046e-05
	THOC2	4388.84	0.214991	0.043473	4.94538	7.59944e-07	1.59868e-05
	TGFBR1	1524.63	0.326675	0.0660974	4.94232	7.7198e-07	1.62129e-05
	DAZAP1	3335.59	-0.232547	0.0470556	-4.94195	7.73438e-07	1.62164e-05
	CLCN2	877.175	0.41057	0.0831375	4.93845	7.87473e-07	1.64832e-05
	HMGB3	5050.11	-0.203313	0.0411861	-4.93645	7.95554e-07	1.66247e-05
	ICAM5	292.23	0.584815	0.118503	4.93501	8.0148e-07	1.67208e-05
	KIAA0895L	428.316	0.519506	0.105357	4.93091	8.18475e-07	1.70471e-05
	MCM5	2586.9	-0.255776	0.0519311	-4.9253	8.42305e-07	1.75144e-05
	HMGB2	5356.46	-0.205069	0.0416452	-4.92421	8.47029e-07	1.75835e-05
	ZNF469	2473.05	-0.261739	0.0531618	-4.92345	8.50315e-07	1.76227e-05
	EPHA4	866.662	0.401853	0.0816319	4.92275	8.53386e-07	1.76572e-05
	TNFSF10	494.586	-0.491359	0.0998642	-4.92028	8.64226e-07	1.78522e-05
	HMGA1	4191.9	-0.215426	0.0438007	-4.91832	8.72901e-07	1.80018e-05
	PRDX3	4185.63	0.210564	0.0428681	4.9119	9.01959e-07	1.85706e-05
	GNL2	3581.93	-0.237032	0.0482618	-4.91138	9.04366e-07	1.85898e-05
	APEH	2992.06	0.242549	0.0494147	4.90843	9.18066e-07	1.88406e-05
	PLEKHB2	4910.61	0.207599	0.0423418	4.90294	9.44134e-07	1.9344e-05
	PFKP	3334.2	-0.238733	0.0487061	-4.90151	9.51051e-07	1.9454e-05
	ATF6B	1555.99	-0.331162	0.0675818	-4.90016	9.57563e-07	1.95554e-05
	VIPR2	130.143	0.676313	0.138087	4.89773	9.69504e-07	1.97672e-05
	TMEM214	4293.97	0.225412	0.0460397	4.89604	9.77851e-07	1.99051e-05
	ATP5B	15387	0.145559	0.029761	4.89093	1.0036e-06	2.03964e-05
	DUSP12	563.688	-0.488306	0.0998986	-4.88802	1.01857e-06	2.06671e-05
	ART3	1132.23	0.359894	0.0737527	4.87974	1.06226e-06	2.15189e-05
	ZNF512	1070.93	0.368562	0.0755563	4.87797	1.07181e-06	2.16283e-05
	EIF4EBP2	5497.21	0.188885	0.0387236	4.87779	1.07282e-06	2.16283e-05
	TXNDC12	1659.94	0.309802	0.0635124	4.87781	1.07268e-06	2.16283e-05
	CFD	77.7228	-0.682686	0.139978	-4.87708	1.07666e-06	2.1671e-05
	NTN4	3943.61	-0.21669	0.044575	-4.86125	1.1665e-06	2.34417e-05
	CHST10	305.836	-0.563716	0.116321	-4.84621	1.2584e-06	2.52484e-05
	FAM129A	1161.6	0.350104	0.0722803	4.8437	1.27445e-06	2.55296e-05
	PPP2R2C	636.073	-0.443062	0.0916077	-4.83651	1.32138e-06	2.64102e-05
	FUS	9392.79	-0.168297	0.0347986	-4.83633	1.32261e-06	2.64102e-05
	MFAP2	814.148	-0.413009	0.085447	-4.83351	1.34147e-06	2.67443e-05
	SMURF2	1090.67	-0.360016	0.0745716	-4.82779	1.38059e-06	2.74808e-05
	RPS6KA1	1836.78	0.297775	0.0616896	4.82698	1.38617e-06	2.75483e-05
	PARP12	702.321	-0.449235	0.0931544	-4.82248	1.41787e-06	2.81338e-05
	FGFR4	416.842	-0.516585	0.107182	-4.8197	1.43777e-06	2.84838e-05
	FECH	611.013	0.45286	0.0939859	4.81838	1.44729e-06	2.86272e-05
	EPHA2	2550.34	-0.254081	0.0527698	-4.8149	1.47274e-06	2.90849e-05
	FAM46C	109.906	0.674685	0.140192	4.81256	1.49007e-06	2.9381e-05
	DHRS3	1302.65	0.336463	0.0699274	4.8116	1.49727e-06	2.94767e-05
	AK4	2644.23	0.250849	0.0521476	4.81036	1.5066e-06	2.96141e-05
	OBSCN	625.897	-0.482112	0.10033	-4.80526	1.54548e-06	3.03078e-05
	ERRFI1	3043.06	-0.235266	0.0489616	-4.8051	1.54671e-06	3.03078e-05
	ABRACL	4631.6	0.219022	0.0455849	4.80471	1.54978e-06	3.03207e-05
	TFPI2	1163.17	-0.373141	0.0776685	-4.80428	1.55307e-06	3.0338e-05
	HNRNPUL2	8841.64	0.157758	0.0328399	4.80385	1.55643e-06	3.03564e-05
	BRWD3	2129.38	0.273013	0.0568685	4.80078	1.58052e-06	3.07785e-05
	MLLT11	475.573	0.498034	0.103959	4.79068	1.66218e-06	3.23188e-05
	NBEAL2	3805.96	0.221985	0.046342	4.79015	1.66654e-06	3.23535e-05
	KCNC4	151.233	-0.64686	0.13536	-4.7788	1.76346e-06	3.41822e-05
	LDOC1	1831.97	0.291034	0.0609192	4.77738	1.77598e-06	3.4372e-05
	SLC12A7	2123.16	-0.276392	0.0578707	-4.77603	1.78792e-06	3.455e-05
	SPSB1	1289.58	-0.331399	0.069426	-4.77342	1.81126e-06	3.49439e-05
	EHBP1L1	1455.02	-0.328715	0.0688678	-4.77313	1.81386e-06	3.49439e-05
	RBM25	3782.92	0.215923	0.0452433	4.7725	1.81955e-06	3.49999e-05
	MAZ	10032.2	-0.168955	0.03541	-4.77139	1.82961e-06	3.51396e-05
	ADCK3	2204.96	-0.279129	0.0585401	-4.76817	1.85909e-06	3.56514e-05
	PITPNM3	328.667	-0.55834	0.117124	-4.7671	1.86894e-06	3.57858e-05
	TTC14	542.296	0.462139	0.0969589	4.76633	1.87607e-06	3.58678e-05
	SLC50A1	3212.56	0.236192	0.0495949	4.76242	1.91283e-06	3.65149e-05
	KIAA1598	1071.19	-0.358758	0.0753436	-4.76162	1.92042e-06	3.66043e-05
	MYO18A	2190.47	0.265565	0.0558726	4.75305	2.00368e-06	3.81336e-05
	TRAF4	3498.68	0.227764	0.0479267	4.75234	2.0108e-06	3.82113e-05
	PKP3	3361.4	-0.236972	0.0498932	-4.74958	2.0384e-06	3.86774e-05
	MAPK13	554.692	-0.460158	0.0970124	-4.74329	2.10271e-06	3.97776e-05
	LUC7L	740.488	0.423331	0.0892434	4.74355	2.10002e-06	3.97776e-05
	KLK11	2768.04	-0.241499	0.0509746	-4.73763	2.16229e-06	4.08433e-05
	UBR5	10955.7	-0.152107	0.0321084	-4.7373	2.16581e-06	4.08484e-05
	CTSH	2187.25	-0.266389	0.0562395	-4.73669	2.17239e-06	4.09112e-05
	CREBBP	4245.34	-0.204065	0.043091	-4.73568	2.18318e-06	4.10529e-05
	UNC13D	692.364	-0.425656	0.0899452	-4.73239	2.21888e-06	4.16619e-05
	PRSS8	1873.97	0.299988	0.0634913	4.72487	2.30267e-06	4.31707e-05
	ALDH1A3	3550.12	0.216491	0.0458665	4.72002	2.35826e-06	4.41472e-05
	LGALS1	5269.76	0.188106	0.03988	4.71679	2.3959e-06	4.47851e-05
	SARS	3732.98	0.211469	0.0448366	4.71645	2.39996e-06	4.47946e-05
	GBA2	1184.31	0.341648	0.0724704	4.71432	2.4252e-06	4.51986e-05
	IDH2	3344.49	-0.221693	0.0470482	-4.71204	2.45243e-06	4.56385e-05
	C7orf50	2264.66	-0.267723	0.0568262	-4.71125	2.46198e-06	4.57484e-05
	CLK1	923.908	0.373368	0.0792751	4.70978	2.47983e-06	4.60122e-05
	STARD4	132.914	0.648206	0.13782	4.70328	2.56018e-06	4.74332e-05
	NRBP2	2144.94	0.284733	0.0605915	4.69922	2.61153e-06	4.83133e-05
	NDUFA1	2018.42	0.270764	0.0576919	4.69327	2.68868e-06	4.96675e-05
	PPP1R10	1828.27	0.281858	0.0600885	4.69071	2.72257e-06	5.02198e-05
	TRIB2	1044.71	-0.352708	0.0753011	-4.68396	2.81381e-06	5.18269e-05
	NPM3	1053.77	0.352908	0.0753556	4.68324	2.82377e-06	5.19342e-05
	RPL13	13532	-0.14633	0.0312598	-4.68108	2.85363e-06	5.24069e-05
	SHROOM3	4332.06	-0.210882	0.045072	-4.67879	2.88575e-06	5.29195e-05
	AXIN2	81.7569	-0.657922	0.140888	-4.66981	3.01483e-06	5.52061e-05
	GCN1L1	6710.09	0.174005	0.0372713	4.66861	3.03248e-06	5.54486e-05
	IL8	46.2124	0.62071	0.132994	4.66719	3.0534e-06	5.575e-05
	FAM162A	943.88	0.374648	0.0803942	4.66013	3.16006e-06	5.76138e-05
	FLAD1	2802.38	0.235273	0.0505379	4.65538	3.2338e-06	5.8873e-05
	PDE4D	59.0362	0.643137	0.138163	4.65492	3.24112e-06	5.89209e-05
	PRICKLE1	298.112	-0.544615	0.117007	-4.65456	3.2468e-06	5.89391e-05
	AIF1L	3256.73	-0.221449	0.0476543	-4.64699	3.36821e-06	6.09671e-05
	ATP2B1	925.017	0.379571	0.0816792	4.6471	3.36641e-06	6.09671e-05
	FOXK1	6342.31	-0.174135	0.0374828	-4.64573	3.38877e-06	6.1251e-05
	CCDC50	813.528	-0.389134	0.0838411	-4.64133	3.46174e-06	6.24803e-05
	PKM	22777	-0.129637	0.0279452	-4.63897	3.50148e-06	6.31069e-05
	GNG12	3388.9	0.223575	0.0482735	4.63143	3.63144e-06	6.53555e-05
	GIPC3	304.478	-0.542328	0.117256	-4.62517	3.74295e-06	6.72662e-05
	USP24	2403.16	-0.250589	0.0542662	-4.61777	3.87877e-06	6.96075e-05
	SNAP23	1281.11	0.320187	0.0693665	4.61587	3.91449e-06	7.00487e-05
	TACC1	159.166	-0.621392	0.134613	-4.61615	3.90925e-06	7.00487e-05
	CLCN3	2372.02	0.248393	0.0538666	4.61126	4.00239e-06	7.152e-05
	CSRP1	2140.79	-0.260657	0.0565394	-4.61019	4.02309e-06	7.17879e-05
	RBM5	1683.84	0.286945	0.0625292	4.58898	4.45423e-06	7.93685e-05
	IGSF23	313.952	-0.537937	0.117297	-4.58613	4.51536e-06	8.0344e-05
	SYNPO	360.916	-0.519914	0.113395	-4.58497	4.54047e-06	8.06768e-05
	IDH1	1605.85	0.29146	0.0636473	4.5793	4.66539e-06	8.27795e-05
	GLYR1	2939.16	0.228444	0.0498969	4.57833	4.68711e-06	8.30476e-05
	ZNF217	3781.48	-0.214277	0.046876	-4.57115	4.85057e-06	8.5823e-05
	ALDH3B1	495.869	0.463511	0.101414	4.57049	4.86591e-06	8.59735e-05
	ZBED3	724.024	0.397959	0.0871101	4.56845	4.91337e-06	8.66903e-05
	FRMD4A	492.79	0.457612	0.10019	4.56745	4.93697e-06	8.69847e-05
	RBP7	905.207	-0.365168	0.0799799	-4.56575	4.97708e-06	8.75689e-05
	PRDX5	3582.02	0.215211	0.0471532	4.56407	5.01713e-06	8.81501e-05
	ITGB4	690.046	-0.403333	0.0884218	-4.56147	5.0796e-06	8.91233e-05
	IDH3B	1821.42	0.2735	0.0601087	4.55009	5.36224e-06	9.39513e-05
	NYNRIN	353.803	-0.523226	0.115032	-4.54851	5.40274e-06	9.44296e-05
	SECTM1	2935.59	-0.231888	0.0509818	-4.54844	5.40455e-06	9.44296e-05
	PSMB7	3409.2	-0.213898	0.0470697	-4.54429	5.512e-06	9.61734e-05
	SEZ6L2	846.54	0.372895	0.0820911	4.54246	5.56024e-06	9.68807e-05
	CARHSP1	2427.1	-0.249914	0.0550246	-4.54185	5.57626e-06	9.70254e-05
	HYOU1	2156.88	0.254684	0.05611	4.53901	5.65187e-06	9.82051e-05
	MMS19	1684.72	0.291657	0.0642977	4.53604	5.73212e-06	9.94621e-05
	FAM189A2	275.629	-0.544847	0.120126	-4.53563	5.74321e-06	9.95173e-05
	SLC37A3	1950.96	0.265397	0.05852	4.53516	5.7561e-06	9.96035e-05
	SLC15A3	75.9875	-0.637259	0.14063	-4.53144	5.85827e-06	0.000101232
	AKT1	4379.15	-0.196779	0.0434835	-4.52538	6.0287e-06	0.000104034
	SUCO	2535.89	-0.238676	0.0527625	-4.5236	6.07974e-06	0.000104771
	SCMH1	5251.16	-0.177986	0.0393565	-4.52241	6.11409e-06	0.000105219
	FAM73A	531.582	0.45093	0.0997703	4.51968	6.19337e-06	0.000106438
	JAG2	2853.37	-0.227987	0.0505074	-4.51394	6.36348e-06	0.000109064
	ADAMTSL4	193.927	-0.600323	0.132993	-4.51394	6.36349e-06	0.000109064
	LRRN2	647.83	-0.425483	0.0942689	-4.51351	6.37634e-06	0.000109135
	STK36	490.009	0.458624	0.101667	4.51102	6.45154e-06	0.000110272
	RPL27A	12673.3	0.133637	0.0296357	4.50934	6.50307e-06	0.000111002
	PIK3AP1	134.237	0.620636	0.13778	4.50455	6.65153e-06	0.000113382
	WNT9A	192.996	-0.59488	0.13216	-4.5012	6.75711e-06	0.000115026
	ID4	2824.31	-0.233004	0.0517906	-4.49896	6.82854e-06	0.000116085
	PLEKHN1	224.661	-0.567524	0.126154	-4.49865	6.83874e-06	0.000116102
	HIVEP2	258.579	0.562679	0.125095	4.49801	6.85912e-06	0.000116291
	NACC2	707.176	-0.395346	0.0879574	-4.49474	6.96534e-06	0.000117774
	SNX1	1752.78	0.275775	0.0613549	4.49475	6.96511e-06	0.000117774
	ELOVL5	3436.61	0.215898	0.0481049	4.48807	7.18724e-06	0.000121363
	CLIP2	1971.68	-0.262403	0.0584997	-4.48555	7.27274e-06	0.000122642
	CSF1	1883.55	0.267984	0.0597609	4.48427	7.31626e-06	0.000123145
	NINJ1	1083.09	0.336433	0.075028	4.4841	7.32214e-06	0.000123145
	WBSCR22	1869.79	0.271588	0.0606638	4.47693	7.57225e-06	0.000127181
	HRCT1	145.82	-0.60863	0.136033	-4.47414	7.67183e-06	0.000128682
	DMTN	473.554	-0.471965	0.105562	-4.47096	7.78687e-06	0.000130438
	DDN	221.817	-0.568958	0.127301	-4.46937	7.84493e-06	0.000131236
	CERS6	2889.07	-0.24168	0.0540902	-4.46808	7.89232e-06	0.00013182
	C8orf46	64.2224	0.617853	0.138289	4.46785	7.90084e-06	0.00013182
	SNRNP48	535.862	0.439434	0.0984284	4.4645	8.02547e-06	0.000133722
	MPC1	470.586	0.454029	0.101738	4.46274	8.092e-06	0.000134653
	FUT3	214.829	0.579605	0.129904	4.46179	8.12788e-06	0.000135071
	SPTSSA	1101.35	0.334483	0.0749916	4.46028	8.1854e-06	0.000135847
	GATA6	236.105	0.55602	0.124784	4.45585	8.35627e-06	0.000138318
	SLC7A1	11969.4	-0.133131	0.0298776	-4.45588	8.35486e-06	0.000138318
	TRIM25	3270.33	-0.212496	0.0477167	-4.45328	8.4569e-06	0.0001398
	CD82	3091.09	0.22485	0.0504992	4.45255	8.48564e-06	0.000140091
	POP1	2327.79	-0.251954	0.0566123	-4.45051	8.5668e-06	0.000141245
	TMEM256-PLSCR3	920.758	0.35716	0.0802789	4.44899	8.62732e-06	0.000142057
	AUTS2	1613.19	-0.28107	0.0632552	-4.44343	8.85373e-06	0.000145595
	PLEKHA8	915.768	0.355662	0.0801403	4.43799	9.08028e-06	0.000149125
	RND3	3448.61	-0.217992	0.0491384	-4.43629	9.15223e-06	0.000150111
	STIM1	2155.85	-0.257673	0.0581167	-4.43373	9.26185e-06	0.000151711
	TRPS1	7241.17	-0.161811	0.0365155	-4.43128	9.36744e-06	0.000153241
	RHOA	10760	0.139053	0.0314115	4.42684	9.56248e-06	0.000156229
	SLC35A4	3201.04	0.212971	0.0481301	4.42491	9.64845e-06	0.000157429
	CAPRIN1	14736.2	-0.139055	0.031434	-4.42372	9.7016e-06	0.000158091
	CNKSR3	1182.46	-0.316595	0.0715738	-4.42334	9.71877e-06	0.000158166
	TEAD2	2487.99	-0.242378	0.0548114	-4.42204	9.77723e-06	0.000158873
	KIT	22217.7	0.114462	0.0258858	4.42182	9.78748e-06	0.000158873
	PITPNM1	1136.84	0.325539	0.073628	4.4214	9.80632e-06	0.000158974
	ST3GAL4	871.695	0.359784	0.0813807	4.42099	9.82478e-06	0.000159068
	NPM1	18270.3	-0.125675	0.0284343	-4.41985	9.8768e-06	0.000159705
	RARRES3	211.315	-0.564955	0.127843	-4.41914	9.90932e-06	0.000160025
	PAQR6	134.469	0.606453	0.13739	4.41411	1.01429e-05	0.000163586
	EGR1	535.3	-0.435134	0.0985879	-4.41367	1.01635e-05	0.000163708
	SDCBP	2003.56	0.257064	0.0583266	4.40732	1.04657e-05	0.000168362
	ZBTB18	1468.11	-0.290585	0.065954	-4.40587	1.0536e-05	0.000169276
	SERTAD4	377.019	-0.481261	0.109254	-4.40497	1.05797e-05	0.000169761
	HRAS	534.651	-0.43051	0.0977839	-4.40266	1.0693e-05	0.00017136
	BBS2	585.898	0.420439	0.0955703	4.39927	1.08617e-05	0.000173843
	VPS51	2036.16	-0.25475	0.0580075	-4.39167	1.12482e-05	0.000179654
	GOLGA8A	510.222	0.447521	0.101905	4.39157	1.12534e-05	0.000179654
	CRISPLD2	363.418	-0.493194	0.112352	-4.38972	1.13498e-05	0.000180965
	CDC42EP1	2621.16	-0.231352	0.0527066	-4.38943	1.13646e-05	0.00018097
	IL12RB2	222.551	-0.553984	0.126223	-4.38892	1.13915e-05	0.00018117
	PAFAH2	580.318	0.418021	0.0952528	4.38854	1.14112e-05	0.000181254
	ATP2A2	8236.72	-0.148453	0.0338424	-4.38661	1.15132e-05	0.000182644
	RHPN1	2170.33	0.445653	0.10163	4.38507	1.15948e-05	0.000183706
	UBE2C	4678.9	-0.185755	0.0424217	-4.37878	1.19347e-05	0.000188854
	FLYWCH1	796.472	0.370539	0.0846548	4.37706	1.20289e-05	0.000190106
	HCFC1	6171.33	-0.168232	0.0384416	-4.3763	1.20709e-05	0.00019053
	MDFI	139.652	-0.59882	0.13685	-4.37573	1.21025e-05	0.000190788
	SLC44A2	10761.9	-0.144606	0.0330616	-4.37383	1.22084e-05	0.000192217
	TARS2	1343.95	0.299217	0.0684191	4.3733	1.22383e-05	0.000192447
	C6orf48	1461.32	0.289581	0.066272	4.36959	1.24481e-05	0.000195502
	SHANK3	811.734	-0.363375	0.0831947	-4.36777	1.25524e-05	0.000196895
	SPTLC2	2973.51	0.214052	0.0490399	4.36484	1.27213e-05	0.000199296
	MYO1B	838.769	-0.364246	0.0836558	-4.3541	1.33615e-05	0.000208546
	NBEA	93.0182	0.613411	0.140878	4.35421	1.33551e-05	0.000208546
	AMOT	2945.89	-0.217378	0.0499217	-4.35438	1.33444e-05	0.000208546
	IMPA1	563.42	0.416641	0.0957282	4.35234	1.34695e-05	0.000209971
	WDR59	868.144	0.355842	0.0817874	4.35082	1.35632e-05	0.000210932
	C6orf132	1089.26	-0.331215	0.076128	-4.35077	1.35663e-05	0.000210932
	HK2	2009.18	0.252494	0.0580377	4.35052	1.35815e-05	0.000210932
	CTSD	3381.17	-0.203024	0.0466837	-4.34893	1.36806e-05	0.000212209
	WDR83OS	3038.34	0.214074	0.0492523	4.34648	1.3834e-05	0.000214325
	NFKBIZ	335.619	0.492474	0.113347	4.34483	1.39386e-05	0.00021568
	FPGS	1474.29	-0.2841	0.0654386	-4.34147	1.41531e-05	0.00021873
	HSD17B12	2443.57	0.230587	0.053132	4.33989	1.42555e-05	0.000220041
	FRY	281.505	0.519119	0.119767	4.33439	1.46165e-05	0.000225338
	EFCAB4A	1360.67	0.317701	0.0733636	4.3305	1.48774e-05	0.000229079
	HEG1	247.135	-0.531212	0.122851	-4.32404	1.53195e-05	0.000235598
	SIGIRR	1129.59	-0.318503	0.0736895	-4.32224	1.54455e-05	0.000237245
	MFN1	1739.19	0.266628	0.0617083	4.32078	1.55478e-05	0.000238525
	SFN	3185.4	-0.215007	0.049805	-4.31697	1.58187e-05	0.000242274
	SP1	2747.74	-0.218701	0.0506626	-4.3168	1.58306e-05	0.000242274
	VAV2	2364.02	-0.235624	0.0546652	-4.31032	1.6302e-05	0.000249185
	NPHP3	372.192	0.472452	0.109727	4.30569	1.66463e-05	0.000254139
	CENPV	1085.41	-0.323816	0.0752583	-4.30273	1.68708e-05	0.000257255
	TLR6	318.367	0.494895	0.115038	4.30199	1.69268e-05	0.000257796
	FASN	18112.2	-0.118726	0.0276098	-4.30015	1.70679e-05	0.000259631
	MSH2	4644.56	-0.200122	0.0465438	-4.29966	1.71062e-05	0.000259898
	CTTN	10490.9	0.134963	0.0313964	4.29868	1.71822e-05	0.000260424
	ANP32A	3679.14	-0.193495	0.0450125	-4.29869	1.71812e-05	0.000260424
	WDR35	1015.98	0.345561	0.0804694	4.29431	1.75237e-05	0.00026528
	VARS	3317.41	0.208244	0.0485112	4.29269	1.7652e-05	0.000266902
	SMS	3138.81	-0.213442	0.0497674	-4.2888	1.79643e-05	0.000271298
	HNRNPA3	5720.63	-0.16807	0.0391928	-4.2883	1.80048e-05	0.000271583
	C9orf152	20.4928	0.472565	0.110208	4.28795	1.80332e-05	0.000271686
	LTA4H	1677.75	0.266325	0.0621798	4.28315	1.84266e-05	0.000277281
	TNS3	1914.41	-0.255825	0.0597333	-4.28278	1.84574e-05	0.000277412
	TALDO1	5108.5	-0.169976	0.0397132	-4.28009	1.86818e-05	0.000280449
	PRLR	816.77	0.355087	0.0830034	4.27797	1.88602e-05	0.00028279
	ZBTB10	1066.53	-0.332658	0.0778484	-4.27315	1.92731e-05	0.000288638
	PILRB	1778.1	0.47187	0.110443	4.27252	1.93277e-05	0.000289111
	HRK	87.8682	-0.601701	0.14088	-4.27102	1.9458e-05	0.000290714
	PSMD3	3814.33	-0.197883	0.0463532	-4.26903	1.96327e-05	0.000292977
	CDC42EP4	1949.13	-0.250982	0.0588174	-4.26714	1.97997e-05	0.000295118
	MEGF9	1025	0.323638	0.0758677	4.26583	1.99164e-05	0.000296282
	RPS24	13765.6	-0.124068	0.0290848	-4.26573	1.99249e-05	0.000296282
	PHLDA1	439.496	0.452877	0.106214	4.26382	2.00963e-05	0.000298479
	RAB26	69.1001	0.596641	0.14008	4.25927	2.05091e-05	0.000304251
	C6orf89	1373.35	0.292363	0.0686475	4.2589	2.05433e-05	0.0003044
	CPSF6	2906.75	-0.215347	0.0505764	-4.25787	2.06386e-05	0.000305093
	SDK1	369.462	-0.469736	0.110317	-4.25805	2.06215e-05	0.000305093
	ACAP3	1423.65	0.301057	0.0707523	4.25508	2.08971e-05	0.00030855
	SLC17A5	2523.57	0.226648	0.0532847	4.25352	2.10433e-05	0.000310346
	LMO4	1984.02	0.252567	0.0593961	4.25225	2.11633e-05	0.00031175
	EXTL1	115.552	0.592128	0.139447	4.24626	2.17366e-05	0.000319821
	ARHGAP29	14664.6	-0.12869	0.03035	-4.24019	2.23326e-05	0.000328205
	VANGL2	3213.6	-0.203747	0.048057	-4.23969	2.23828e-05	0.00032856
	SBSN	504.778	0.422199	0.0995997	4.23896	2.2456e-05	0.00032925
	AIFM2	984.666	-0.346029	0.081667	-4.23708	2.26447e-05	0.000331631
	LRSAM1	961.961	0.342115	0.0807503	4.2367	2.26831e-05	0.000331806
	ECE1	3454.55	-0.196247	0.0463348	-4.23542	2.28127e-05	0.000333314
	G3BP2	6047.52	0.169643	0.0400741	4.23322	2.30366e-05	0.000335417
	KMT2A	7987.03	-0.155026	0.03662	-4.23339	2.30198e-05	0.000335417
	SHANK2	2995.72	-0.224034	0.0529196	-4.23348	2.30103e-05	0.000335417
	TLN1	7903.55	0.145943	0.0345203	4.22773	2.36056e-05	0.000343305
	KLF10	994.363	-0.328658	0.0778548	-4.22142	2.42766e-05	0.000352655
	KIAA0247	2515.85	-0.229048	0.0542629	-4.22107	2.43141e-05	0.000352792
	EEF1A1	148207	-0.0885699	0.0209843	-4.22077	2.43471e-05	0.000352865
	LRP8	2594.68	-0.221315	0.0524418	-4.2202	2.4408e-05	0.000353341
	ACTL6A	3715.75	-0.189634	0.044967	-4.21718	2.47382e-05	0.000357388
	DCXR	757.353	0.363308	0.0861507	4.21712	2.47444e-05	0.000357388
	TECPR2	1202.71	0.307411	0.0729138	4.21609	2.48577e-05	0.000358612
	RB1CC1	3871.36	-0.188801	0.0447863	-4.21559	2.49125e-05	0.000358991
	XPNPEP3	449.664	0.440575	0.104544	4.21425	2.50605e-05	0.000360711
	MAFB	409.468	-0.448931	0.106631	-4.21014	2.55217e-05	0.000366929
	C19orf43	7256.03	-0.164658	0.0391191	-4.20915	2.56334e-05	0.000368114
	NPEPL1	535.54	-0.410183	0.0974864	-4.2076	2.581e-05	0.000370228
	NR4A3	52.6237	0.572473	0.136359	4.19828	2.68951e-05	0.000385353
	THEM6	4353.05	-0.194138	0.0462854	-4.19437	2.73628e-05	0.000391609
	UQCC1	528.362	0.416731	0.0994216	4.19155	2.77052e-05	0.000396059
	LAMA5	3009.27	-0.218091	0.0520442	-4.1905	2.78345e-05	0.000397455
	HADHA	8915.79	0.148113	0.035351	4.1898	2.79206e-05	0.000398232
	TMEM220	33.5749	-0.523859	0.125052	-4.18912	2.80041e-05	0.000398971
	DENND4B	2366.56	0.239997	0.0573295	4.18628	2.83561e-05	0.000403529
	INF2	2356.7	-0.230355	0.055047	-4.1847	2.85548e-05	0.000405685
	KLC3	640.083	-0.384521	0.0918904	-4.18456	2.85721e-05	0.000405685
	CASZ1	2127.21	-0.236514	0.0566131	-4.17772	2.94441e-05	0.000417125
	UBA5	1106.06	0.310675	0.0743619	4.17788	2.9424e-05	0.000417125
	NFKBIA	1346.98	0.307518	0.0736224	4.17697	2.95424e-05	0.000418047
	TIA1	2471.07	0.230134	0.0551447	4.17327	3.00258e-05	0.000424229
	NFAT5	1856.87	-0.249318	0.0597439	-4.17311	3.00468e-05	0.000424229
	H3F3B	5245.18	-0.166425	0.0398909	-4.17199	3.01945e-05	0.000425837
	SLIT3	466.613	-0.448496	0.107607	-4.1679	3.07419e-05	0.000433072
	ARHGAP26	375.141	0.489487	0.117523	4.16502	3.11319e-05	0.000438076
	FAM111B	1682.05	-0.26231	0.0630422	-4.16087	3.17041e-05	0.000445629
	CEP135	251.067	0.509794	0.122585	4.15869	3.20084e-05	0.000449403
	NCOA6	2444.51	-0.22965	0.0552361	-4.1576	3.21606e-05	0.000451037
	SEPN1	7783.07	-0.143177	0.034441	-4.15718	3.22198e-05	0.000451365
	ASH2L	2191.52	-0.253092	0.0609061	-4.15544	3.24659e-05	0.000454306
	MSX1	351.763	-0.471652	0.113532	-4.15436	3.26203e-05	0.00045582
	TYMP	1629.97	-0.273435	0.0658218	-4.15417	3.26465e-05	0.00045582
	KLHL23	3273.54	-0.200748	0.0483364	-4.15315	3.27936e-05	0.000457365
	MAP2	246.265	-0.517704	0.124678	-4.15233	3.29114e-05	0.0004585
	ZWILCH	1670.23	0.265909	0.0640504	4.15156	3.30214e-05	0.000459524
	GLTSCR2	3785.92	-0.189484	0.0456797	-4.1481	3.35248e-05	0.000466013
	GYS1	1752.4	0.253121	0.0610468	4.14634	3.37826e-05	0.000469078
	FOXM1	2605.6	-0.218139	0.0526187	-4.14566	3.38837e-05	0.000469446
	SLC31A1	1542.64	0.270589	0.0652673	4.14586	3.38534e-05	0.000469446
	RBMX	6916.85	-0.147305	0.0355556	-4.14294	3.42876e-05	0.000474519
	SCAMP3	2962.78	0.205552	0.0496352	4.14125	3.45418e-05	0.000477511
	HOMER2	479.992	-0.418901	0.1012	-4.13932	3.48335e-05	0.000481016
	HDLBP	10847.8	-0.14026	0.0338911	-4.13855	3.49509e-05	0.00048158
	ARHGEF2	3093.46	0.200584	0.0484651	4.13873	3.4924e-05	0.00048158
	PDPR	1465.04	0.283798	0.0686848	4.13189	3.59798e-05	0.000495215
	KRT18	7193.88	-0.160263	0.0387967	-4.13085	3.61427e-05	0.000496913
	POR	2723.86	-0.213573	0.0517157	-4.12975	3.63154e-05	0.000498743
	CTSV	312.247	-0.479521	0.11625	-4.12493	3.70853e-05	0.00050876
	FAM107B	855.73	0.337367	0.0818064	4.12397	3.72402e-05	0.000510329
	ADORA2B	690.678	-0.36797	0.089312	-4.12005	3.78782e-05	0.000518507
	KCNQ4	1677.14	-0.259975	0.0631277	-4.11825	3.81763e-05	0.00052202
	EPC2	1139.97	-0.305737	0.0742536	-4.11747	3.83062e-05	0.000523228
	LMNB1	5618.27	-0.165198	0.0401253	-4.11705	3.83754e-05	0.000523604
	HCN3	390.083	0.460525	0.111888	4.11596	3.85568e-05	0.000525509
	DOPEY1	671.21	0.37017	0.0899484	4.11536	3.86575e-05	0.000526311
	PLXDC2	3492.65	0.192757	0.0468838	4.11137	3.93315e-05	0.000534908
	EXOC6B	922.486	0.328813	0.0800227	4.10899	3.97388e-05	0.000539864
	VGLL4	3294.4	0.222739	0.0542415	4.10642	4.01831e-05	0.000545311
	PAPSS1	4831.83	0.170046	0.0414154	4.10586	4.02806e-05	0.000546046
	SLC25A23	1681.06	0.254471	0.0619816	4.1056	4.03274e-05	0.000546091
	NEK6	1059.92	-0.311684	0.0759256	-4.10512	4.04112e-05	0.000546637
	BIRC3	112.87	0.573679	0.139797	4.10365	4.0668e-05	0.00054952
	TDRD5	224.88	-0.51682	0.126152	-4.0968	4.189e-05	0.000565425
	ZBTB42	521.72	-0.402841	0.0983715	-4.0951	4.21991e-05	0.000568986
	HBS1L	8379.66	0.148736	0.0363338	4.09361	4.24701e-05	0.000572028
	KIF20A	3800.32	-0.183328	0.0448014	-4.09201	4.27646e-05	0.000575378
	RASL10B	174.652	-0.543709	0.132922	-4.09044	4.30564e-05	0.000578685
	ACACA	6731.43	0.14648	0.0358297	4.08822	4.34693e-05	0.000583612
	VPS26B	908.651	0.327023	0.0800687	4.08428	4.42133e-05	0.000592967
	RPL7A	30031.3	-0.110637	0.0270967	-4.08305	4.44475e-05	0.000595474
	ATP6V0B	4110.94	0.180842	0.0443017	4.08205	4.46401e-05	0.000597418
	GALNT16	33.904	-0.515001	0.126215	-4.08034	4.49703e-05	0.000601198
	LEMD1	101.871	0.57278	0.140389	4.07994	4.50471e-05	0.000601584
	RGS5	10827.8	0.149671	0.0366899	4.07935	4.51618e-05	0.000602476
	FBXO32	1266.83	0.28572	0.0700453	4.07908	4.52139e-05	0.000602533
	RPL5	18778.1	-0.1126	0.0276145	-4.07759	4.55057e-05	0.000605621
	PRDX1	13563	-0.117124	0.028725	-4.0774	4.5542e-05	0.000605621
	FTL	11956.1	-0.124415	0.0305415	-4.07364	4.62846e-05	0.000614847
	ANAPC15	663.604	-0.366446	0.0900168	-4.07086	4.68396e-05	0.000621563
	MKL1	1586.71	0.26162	0.0642763	4.07025	4.69635e-05	0.000622551
	SECISBP2	1395.42	-0.276706	0.068017	-4.06818	4.7382e-05	0.00062728
	TRIM47	866.605	-0.330447	0.0812309	-4.06799	4.74199e-05	0.00062728
	TANC2	352.158	-0.455765	0.112057	-4.06726	4.75689e-05	0.000628589
	RHOD	1102.1	0.322551	0.0793124	4.06684	4.76542e-05	0.000629055
	ARV1	491.491	0.410808	0.101035	4.066	4.78261e-05	0.000630663
	PCDH1	532.774	-0.40525	0.099705	-4.06449	4.81367e-05	0.000634094
	MRAS	1238.93	0.295043	0.0726345	4.06202	4.86492e-05	0.000640175
	TNPO1	3035.81	-0.201762	0.0496827	-4.06101	4.88604e-05	0.000641612
	YTHDC2	852.481	0.333001	0.081995	4.06124	4.88127e-05	0.000641612
	MDFIC	408.869	-0.432909	0.106855	-4.05136	5.09203e-05	0.000667964
	STAP2	1018.14	0.322731	0.0796751	4.05059	5.10883e-05	0.000668773
	PLCB3	2517.36	0.218954	0.0540531	4.05071	5.10621e-05	0.000668773
	EIF5	5129.06	-0.161944	0.0399985	-4.04876	5.14907e-05	0.000673339
	LUZP1	2769.47	-0.208068	0.0514068	-4.04748	5.17721e-05	0.000676316
	CHPF	853.557	0.338427	0.08367	4.04478	5.23725e-05	0.00068345
	RERE	2417.22	-0.216263	0.0535637	-4.03749	5.4026e-05	0.000704298
	ATP1A1	19141.2	-0.107861	0.0267259	-4.03582	5.4411e-05	0.000707326
	KCTD12	316.757	-0.466135	0.115506	-4.03558	5.44667e-05	0.000707326
	MAST2	2510.94	0.213826	0.0529806	4.03594	5.43852e-05	0.000707326
	DNAJB1	8935.02	-0.132661	0.0328735	-4.03551	5.44832e-05	0.000707326
	TPI1	9543.68	-0.133959	0.0332041	-4.0344	5.47417e-05	0.000709949
	RAB20	371.357	-0.442033	0.109573	-4.03416	5.47982e-05	0.00070995
	HNRNPR	6678.32	-0.145079	0.0359896	-4.03115	5.55054e-05	0.000718372
	OGT	4784.04	-0.163796	0.0406526	-4.02916	5.5977e-05	0.000723731
	TAP2	2254.55	-0.222293	0.0551813	-4.02841	5.61555e-05	0.000725294
	TTC17	2242.33	-0.222125	0.0551847	-4.02511	5.69491e-05	0.00073479
	ENOSF1	1296.19	0.280164	0.0696213	4.02411	5.71905e-05	0.000737148
	PVRL4	3324.96	0.191186	0.0475568	4.02015	5.816e-05	0.000748877
	CSDE1	25212.9	-0.108274	0.026938	-4.01936	5.8356e-05	0.000750633
	STAG1	1891.72	-0.248474	0.0618873	-4.01495	5.94581e-05	0.000764027
	NR4A2	291.703	0.480683	0.119733	4.01462	5.95423e-05	0.000764329
	SIX5	729.862	-0.349123	0.0869939	-4.01319	5.99048e-05	0.000768198
	CEACAM1	439.207	-0.422173	0.105328	-4.00817	6.11916e-05	0.0007839
	CBR4	434.449	-0.417605	0.10423	-4.00658	6.16054e-05	0.000788398
	ITGA4	591.351	-0.383577	0.0957812	-4.00473	6.20895e-05	0.000793787
	PDAP1	2518.13	-0.212723	0.0531223	-4.0044	6.21745e-05	0.000794066
	BBS7	518.041	0.397167	0.099212	4.00321	6.24887e-05	0.000797269
	POMGNT1	1226.16	0.282522	0.0706761	3.99742	6.40377e-05	0.000816205
	AHCYL2	419.854	0.421717	0.10563	3.99241	6.5404e-05	0.000832776
	CA8	3003.61	0.197162	0.0493876	3.99214	6.54789e-05	0.000832886
	ETV4	123.943	-0.552681	0.138455	-3.99177	6.55826e-05	0.000833363
	KDM2B	1710.58	-0.247962	0.0621273	-3.99119	6.57433e-05	0.000834562
	FCGRT	260.789	-0.483911	0.121288	-3.98976	6.61415e-05	0.000838771
	GAREML	171.738	-0.531659	0.133267	-3.98942	6.62349e-05	0.000839109
	KDELC2	124.571	-0.552293	0.138458	-3.98888	6.63852e-05	0.000840167
	HLA-E	1263.95	-0.280738	0.0704541	-3.9847	6.75663e-05	0.000854255
	SYT7	2359.74	-0.232675	0.0584628	-3.97988	6.89502e-05	0.000870876
	TRIM16	366.062	0.438269	0.110184	3.9776	6.96148e-05	0.00087839
	SPATA20	393.871	-0.431859	0.108641	-3.9751	7.03507e-05	0.000886786
	SCARB2	3056.56	0.19507	0.0491569	3.96831	7.23831e-05	0.000911491
	GTF3C1	3115.52	0.195304	0.0492231	3.96774	7.25586e-05	0.000912787
	GBF1	3232.12	0.193306	0.0487248	3.9673	7.269e-05	0.000913526
	FOXF2	83.8071	-0.558636	0.140827	-3.96681	7.28399e-05	0.000914497
	BRINP2	555.436	-0.390473	0.0984848	-3.96481	7.34552e-05	0.000921253
	SGK223	850.423	-0.333743	0.0841811	-3.96458	7.35245e-05	0.000921253
	NOTCH2	49378.5	-0.102632	0.0258984	-3.96287	7.40555e-05	0.000926983
	CLEC11A	166.848	0.528048	0.133365	3.95941	7.51356e-05	0.000939568
	ZCCHC6	2057.63	0.234373	0.0592821	3.95351	7.70114e-05	0.00096207
	ELF4	1753.32	-0.242198	0.0612938	-3.95142	7.76885e-05	0.000969565
	AFAP1	3020.03	-0.192265	0.0486759	-3.94991	7.81811e-05	0.000974746
	TWSG1	835.939	0.338028	0.0856769	3.94538	7.96738e-05	0.000992373
	SCPEP1	838.173	0.328783	0.0833955	3.94245	8.06523e-05	0.00100357
	IQGAP1	10358.3	-0.126401	0.0320829	-3.93984	8.15369e-05	0.00101357
	DDX39A	6577.04	0.144768	0.0367634	3.93784	8.22171e-05	0.00102102
	OTUB2	339.594	0.44879	0.114033	3.93561	8.29848e-05	0.00102954
	FXYD6	51.1012	-0.53443	0.135833	-3.93446	8.33855e-05	0.00103349
	PDE8B	267.412	0.474448	0.12062	3.9334	8.37516e-05	0.001037
	NUP107	2034.44	-0.231864	0.0589786	-3.93133	8.44779e-05	0.00104497
	COL6A2	797.739	-0.335968	0.0855283	-3.92814	8.56042e-05	0.00105786
	SNX14	1226.65	0.279085	0.0710584	3.92754	8.5818e-05	0.00105946
	ZHX3	1342.98	0.268311	0.0683194	3.9273	8.59035e-05	0.00105948
	C7orf41	668.492	0.351931	0.0896734	3.92458	8.68801e-05	0.00107047
	NCEH1	258.645	0.481237	0.122662	3.92327	8.7355e-05	0.00107527
	RFK	1204.48	0.280026	0.0713864	3.92268	8.75682e-05	0.00107684
	FAM46A	485.801	0.396287	0.101088	3.92022	8.84686e-05	0.00108579
	ZSCAN5A	103.732	-0.550242	0.140352	-3.92044	8.8386e-05	0.00108579
	ALDOC	707.89	0.343762	0.0877038	3.91958	8.87046e-05	0.00108763
	VCAN	210.202	0.499476	0.127557	3.91571	9.01382e-05	0.00110413
	IRF1	1054.14	-0.299852	0.0766092	-3.91405	9.07608e-05	0.00111067
	LDLRAD3	1887.3	-0.23143	0.0591634	-3.91171	9.16444e-05	0.00112039
	IL17RB	862.485	-0.318681	0.081677	-3.90173	9.55093e-05	0.00116651
	RBM12	2634.08	-0.201428	0.0516505	-3.89982	9.62631e-05	0.00117458
	FAM126A	979.971	0.304968	0.0782208	3.89882	9.6664e-05	0.00117833
	DIRAS1	905.618	-0.311518	0.0799328	-3.89724	9.72938e-05	0.00118486
	TNFAIP1	1749.72	0.243246	0.0624458	3.89531	9.80738e-05	0.0011932
	ANKRD52	4959.46	0.156203	0.0401145	3.89392	9.86363e-05	0.00119888
	EIF3A	10363.3	-0.133011	0.0341644	-3.89326	9.8906e-05	0.001201
	C19orf24	561.957	-0.381237	0.0979976	-3.89027	0.000100132	0.00121472
	MCM7	7947.7	-0.139501	0.0358614	-3.89001	0.000100241	0.00121487
	KRT12	374.155	-0.428834	0.110261	-3.88925	0.000100555	0.00121729
	LEFTY2	86.2648	0.545533	0.140274	3.88906	0.000100635	0.00121729
	BCAT2	1619.41	0.249323	0.0641323	3.88763	0.000101228	0.00122329
	AP5Z1	1248.53	0.287824	0.0740408	3.88737	0.000101336	0.00122343
	SETBP1	87.9816	-0.54748	0.140942	-3.88445	0.000102563	0.00123705
	WLS	560.434	-0.372654	0.0959648	-3.88324	0.000103075	0.00124203
	AZIN1	7221.78	-0.1425	0.0367087	-3.88191	0.000103639	0.00124763
	VWA1	656.5	-0.362042	0.0932722	-3.88156	0.00010379	0.00124825
	VTCN1	2175.62	0.228591	0.0589283	3.87913	0.000104829	0.00125956
	EZH2	2223.96	-0.215274	0.0555154	-3.87773	0.000105435	0.00126563
	HDAC3	1985.25	0.22527	0.0580987	3.87737	0.000105594	0.00126625
	ACTN1	6402.55	-0.144464	0.0372603	-3.87715	0.000105688	0.00126625
	CHST14	304.799	-0.452496	0.116758	-3.87551	0.0001064	0.00127356
	VCP	11908.1	-0.119194	0.0307787	-3.87263	0.000107669	0.00128749
	BAD	645.209	0.351546	0.0907824	3.8724	0.000107768	0.00128749
	FAM84B	3471.46	0.180007	0.0465051	3.87069	0.000108526	0.00129531
	PMPCB	1237.91	-0.277893	0.0718029	-3.87022	0.000108737	0.0012966
	LAPTM4A	9438.63	0.125485	0.0324289	3.86954	0.000109041	0.00129899
	KIAA1147	2937.54	-0.195821	0.0506749	-3.86427	0.000111423	0.00132611
	MPG	595.801	-0.364656	0.0943757	-3.86387	0.000111604	0.00132701
	PIK3R2	2593.21	0.213401	0.0552357	3.86345	0.000111795	0.00132803
	TUBA4A	1622.11	-0.244424	0.0632856	-3.86223	0.000112356	0.00133343
	PARD3	1548.69	-0.253901	0.0657819	-3.85973	0.000113511	0.00134587
	FAM127B	1375.15	0.264819	0.0686316	3.85856	0.000114056	0.00135063
	RPS6	33856	-0.0970397	0.0251502	-3.85841	0.000114127	0.00135063
	LRFN4	2676.97	0.201182	0.0521497	3.85777	0.000114427	0.00135291
	NCAPD3	1615.4	0.245854	0.0637386	3.85722	0.000114682	0.00135465
	TRIM17	48.0524	-0.5185	0.134493	-3.85522	0.000115625	0.0013645
	CRABP2	5680.56	-0.151067	0.0392033	-3.85342	0.000116479	0.00137329
	IBA57	532.294	-0.386426	0.100311	-3.85227	0.00011703	0.0013785
	FGFBP1	85.1341	0.542967	0.140965	3.8518	0.000117253	0.00137984
	CTDSP2	2530.36	-0.203271	0.0527929	-3.85034	0.000117953	0.00138677
	SLC23A2	1310.64	0.267287	0.0694555	3.84832	0.000118932	0.00139697
	STUB1	1527.9	0.258612	0.067228	3.84679	0.000119677	0.00140442
	ATRX	2916.77	-0.196266	0.051031	-3.84603	0.000120049	0.00140747
	ITFG2	507.195	-0.397852	0.103472	-3.84502	0.000120544	0.00141196
	YBX1	69005.9	-0.0928931	0.0241657	-3.844	0.000121045	0.0014165
	DHX58	201.17	-0.500174	0.130214	-3.84117	0.000122448	0.00143159
	GADD45B	865.476	-0.314021	0.0818385	-3.83709	0.000124502	0.00145426
	TGFB2	1534.81	-0.247973	0.064652	-3.83551	0.000125305	0.00146228
	HEBP1	463.296	-0.391334	0.102088	-3.83329	0.000126442	0.00147417
	HIST1H1C	468.234	-0.39184	0.102251	-3.83214	0.000127031	0.00147968
	ANXA6	1889.44	-0.22986	0.0599978	-3.83113	0.000127555	0.00148441
	HSPA4	6026.47	0.146937	0.0383557	3.8309	0.000127676	0.00148444
	PPIP5K2	957.316	0.298701	0.0780543	3.82684	0.000129799	0.00150773
	EIF2D	1281.82	0.268574	0.0702032	3.82566	0.000130422	0.00151357
	ADAMTS9	189.065	0.499286	0.130528	3.82512	0.000130706	0.00151547
	ARHGAP18	1020.37	0.304819	0.0797319	3.82304	0.000131815	0.00152692
	EEF2	71044.8	-0.081065	0.0212069	-3.82258	0.000132064	0.00152839
	DDX46	3591.62	-0.181782	0.0475737	-3.82107	0.000132875	0.00153495
	LRRC14	1520.97	0.255722	0.0669205	3.82129	0.000132757	0.00153495
	SMARCC1	10650	-0.124862	0.0326819	-3.82052	0.000133169	0.00153694
	IGF2R	4628.74	-0.158807	0.0415791	-3.8194	0.000133775	0.00154252
	ABHD10	819.313	0.326796	0.0856282	3.81645	0.000135386	0.00155966
	TUBB2A	746.603	-0.328992	0.0862294	-3.81531	0.000136014	0.00156547
	NDUFA4	5676.69	0.146448	0.0383983	3.81393	0.000136776	0.0015728
	SP5	64.4767	-0.532361	0.139613	-3.81311	0.000137227	0.00157655
	CADM2	32.7358	-0.478034	0.125498	-3.80911	0.000139467	0.00160082
	PAN2	415.852	0.40391	0.106064	3.80816	0.000140007	0.00160555
	GOLGA7B	52.6551	0.52132	0.136922	3.80741	0.000140429	0.00160893
	DACH1	123.593	-0.528312	0.138833	-3.80539	0.000141582	0.00162065
	TSPYL1	1552.93	0.246857	0.064882	3.80471	0.00014197	0.00162362
	ETHE1	534.201	0.378977	0.0996672	3.80243	0.000143285	0.00163717
	CSPP1	1103.48	0.280865	0.0738959	3.80082	0.000144217	0.00164632
	SERBP1	9713.95	-0.131024	0.0344765	-3.80039	0.00014447	0.00164772
	CERS4	654.14	0.344445	0.0906679	3.79897	0.000145297	0.00165564
	U2AF2	6044.72	0.143263	0.0377264	3.79743	0.000146206	0.0016645
	CTNNBIP1	1081.04	0.282582	0.0744535	3.79542	0.000147392	0.00167649
	IQSEC1	727.218	-0.329529	0.0868317	-3.79503	0.000147627	0.00167764
	PCSK6	497.261	-0.379567	0.100035	-3.79433	0.000148042	0.00168009
	HTATIP2	1265.98	-0.269129	0.0709313	-3.79422	0.00014811	0.00168009
	CD9	3799.63	-0.169348	0.0446636	-3.79162	0.000149667	0.00169623
	ALDH9A1	1909.94	0.227787	0.0601006	3.7901	0.000150589	0.00170514
	DIP2B	2969.92	-0.191491	0.0505387	-3.789	0.000151258	0.00171117
	USP54	827.403	0.316898	0.0836455	3.78859	0.000151507	0.00171171
	NWD1	129.858	0.524627	0.13848	3.78847	0.000151577	0.00171171
	MFI2	1512.99	-0.257164	0.0679143	-3.78659	0.000152728	0.00172315
	CCDC34	1636.37	-0.237043	0.0627684	-3.77647	0.000159069	0.00179309
	ASRGL1	604.391	0.351201	0.0930483	3.7744	0.000160395	0.00180642
	PRKAR1A	2890.12	0.187209	0.0496269	3.77233	0.000161728	0.00181981
	GRB10	847.091	-0.312359	0.082817	-3.77168	0.000162153	0.00182296
	ERP27	769.15	-0.326784	0.0866978	-3.76923	0.000163752	0.00183928
	AARS	5477.88	0.145534	0.0386286	3.76753	0.000164871	0.0018502
	MT-CO2	103024	0.186315	0.0494717	3.76608	0.000165829	0.0018593
	HAND2	827.926	-0.319141	0.0847562	-3.7654	0.000166281	0.0018615
	EFS	672.48	-0.339672	0.0902102	-3.76534	0.000166321	0.0018615
	CCNI2	39.3284	-0.488904	0.129874	-3.76445	0.000166915	0.00186648
	MST4	2245.89	0.211925	0.0563003	3.76418	0.000167093	0.00186681
	PHLDA3	140.092	-0.517026	0.13741	-3.76265	0.000168124	0.00187666
	C6orf106	2986.65	-0.185783	0.0493939	-3.76126	0.00016906	0.00188544
	TCF20	2652.33	-0.193164	0.0513613	-3.76088	0.000169316	0.00188662
	ISG20	201.355	0.483902	0.128755	3.75833	0.000171053	0.00190429
	MBNL1	6044.42	-0.141553	0.0376665	-3.75807	0.000171228	0.00190455
	HSD11B1L	344.144	0.42993	0.114458	3.75621	0.000172507	0.00191708
	TXNIP	5025.33	-0.155884	0.0415213	-3.75432	0.000173811	0.00192816
	CLK4	380.287	0.415874	0.110769	3.75443	0.000173736	0.00192816
	RB1	184.791	0.493654	0.131509	3.75378	0.000174191	0.00193068
	RRBP1	3058.71	-0.183953	0.0490096	-3.75341	0.000174445	0.00193179
	KLHL13	95.3242	0.528167	0.140794	3.75135	0.000175887	0.00194605
	TMEM159	760.181	0.32004	0.0853216	3.75099	0.000176138	0.00194711
	TAPBP	2093.35	0.214195	0.0571178	3.75005	0.0001768	0.00195271
	CEBPD	629.663	-0.344557	0.0918893	-3.7497	0.000177049	0.00195375
	GNPTAB	1766.76	0.23389	0.0623831	3.74926	0.000177358	0.00195545
	HSP90AA1	59776	0.0948212	0.0252994	3.74796	0.000178278	0.00196387
	PET112	1030.63	-0.284154	0.0758839	-3.74459	0.00018069	0.0019887
	KLHDC8B	289.11	-0.443038	0.118388	-3.74225	0.000182381	0.00200205
	GK5	1138.03	0.272563	0.0728312	3.74239	0.000182279	0.00200205
	ATR	2285.6	0.220595	0.0589419	3.74258	0.000182141	0.00200205
	ACTG1	42020	-0.0860064	0.0229951	-3.74021	0.000183865	0.00201659
	LRRC8A	3697.98	-0.167935	0.0449881	-3.73287	0.000189312	0.00207452
	WDTC1	1397.41	0.250303	0.0671151	3.72945	0.000191895	0.00210099
	ASXL1	4448.65	-0.157445	0.0422303	-3.72825	0.000192812	0.0021092
	POLR2K	1933.65	0.23199	0.0622506	3.72671	0.000193997	0.00212032
	GOLGA8B	193.244	0.485179	0.130282	3.72406	0.00019604	0.00214079
	PMS2	833.765	0.306207	0.0822369	3.72348	0.000196494	0.00214388
	DNAJA4	61.957	-0.518147	0.139166	-3.72323	0.000196693	0.00214419
	PRRX2	248.243	-0.478569	0.128762	-3.71669	0.000201847	0.00219847
	GPC1	593.687	-0.352279	0.0948019	-3.71595	0.000202446	0.00220308
	TMEM63A	11766.2	0.124306	0.0334838	3.71242	0.000205289	0.0022321
	LRRFIP1	1353.19	-0.253354	0.0682614	-3.71153	0.000206011	0.0022375
	USP1	2358.31	-0.200986	0.054154	-3.71137	0.000206142	0.0022375
	LMCD1	224.457	-0.467308	0.125975	-3.70953	0.000207642	0.00225184
	KIF26B	176.562	0.491234	0.132462	3.70848	0.000208504	0.00225924
	PSMD11	4905.16	-0.153867	0.0414943	-3.70815	0.000208781	0.00226029
	CFB	97.5965	-0.521506	0.140786	-3.70426	0.000212011	0.00229329
	TK1	1992.32	-0.217343	0.0586979	-3.70273	0.000213289	0.00230513
	TDRKH	1153.97	0.268313	0.0724878	3.7015	0.00021433	0.00231439
	KIFC2	2148.65	0.408512	0.110376	3.70109	0.000214678	0.00231617
	MT-CYB	54527.7	0.19383	0.0523873	3.69994	0.00021565	0.00232466
	KIAA0895	775.358	0.315556	0.0853646	3.69656	0.000218538	0.00235377
	CRISPLD1	256.402	-0.457138	0.123713	-3.69515	0.000219755	0.00236284
	HIST1H2BK	940.684	0.302409	0.0818368	3.69527	0.000219657	0.00236284
	SEPW1	2737.99	0.191426	0.0518093	3.69483	0.000220034	0.00236382
	SLAIN1	182.455	0.484984	0.13128	3.69428	0.000220514	0.00236686
	SUPT20H	647.172	0.335791	0.0909	3.69407	0.000220694	0.00236686
	TCEA2	514.429	0.371907	0.100689	3.69362	0.000221085	0.00236903
	SH3YL1	2324.9	0.206147	0.0558286	3.6925	0.000222064	0.0023775
	KLHL5	3705.42	0.179744	0.0487188	3.68941	0.000224775	0.00240448
	KPNB1	8635.46	-0.127558	0.0346173	-3.68481	0.000228877	0.00244628
	TP53BP2	5026.82	-0.150945	0.0409675	-3.68451	0.00022914	0.00244701
	MORN4	127.374	0.509582	0.138361	3.68298	0.000230519	0.00245804
	ELL3	512.951	0.36416	0.0988775	3.68294	0.000230563	0.00245804
	LIMA1	2483.82	-0.195591	0.053114	-3.68249	0.00023097	0.00245821
	SCP2	3307.51	0.188758	0.0512568	3.68259	0.000230877	0.00245821
	COPG1	8005.73	0.126729	0.0344207	3.68176	0.000231633	0.00246318
	PAQR4	1679.74	-0.230997	0.0627548	-3.68094	0.000232372	0.00246895
	ACVR2B	570.675	-0.356764	0.0969416	-3.6802	0.000233054	0.00247303
	GPX8	341.847	0.415021	0.112775	3.68009	0.000233149	0.00247303
	MYEOV	2343.99	-0.210262	0.0571419	-3.67965	0.000233554	0.00247331
	EIF3J	2784.94	-0.188191	0.051144	-3.67963	0.000233568	0.00247331
	SLC18B1	287.931	0.441671	0.120096	3.67765	0.000235393	0.00249053
	STX6	2256.4	0.20543	0.0558832	3.67606	0.000236866	0.00250401
	GFRA3	79.5921	-0.517873	0.140895	-3.67561	0.000237285	0.00250634
	SPRTN	1071.22	0.277166	0.0754126	3.67532	0.000237552	0.00250705
	SLCO4A1	732.55	-0.323341	0.088004	-3.67416	0.000238635	0.00251637
	RNASE1	263.755	0.445207	0.121226	3.67252	0.000240167	0.0025304
	WHSC1L1	4049.31	-0.165922	0.0451875	-3.67186	0.000240788	0.00253483
	PIGT	2210.38	0.203663	0.0554768	3.67114	0.00024147	0.00253987
	PKN1	10692	-0.113771	0.031013	-3.6685	0.000243981	0.00256414
	MEGF6	598.657	-0.358552	0.0977627	-3.66757	0.000244862	0.00257126
	ANKRD46	742.035	0.322366	0.0879067	3.66714	0.000245278	0.00257133
	CAMK2D	963.081	0.288304	0.0786145	3.66731	0.000245113	0.00257133
	CDC42BPA	4105.03	0.158425	0.0432138	3.66606	0.000246314	0.00258005
	ABLIM2	361.293	-0.409374	0.11171	-3.66462	0.000247708	0.00259248
	TDRD7	516.573	-0.361186	0.0985786	-3.66394	0.000248365	0.0025972
	FNIP2	670.661	0.338542	0.0924049	3.66368	0.00024862	0.00259771
	LRRFIP2	1227.69	0.259176	0.070765	3.66249	0.000249775	0.00260761
	LIMS2	226.131	-0.472324	0.12899	-3.66172	0.000250529	0.00261331
	PTPN12	4176.45	-0.158426	0.0432776	-3.66071	0.000251521	0.00262148
	PGP	704.125	0.323143	0.0883429	3.65783	0.000254359	0.00264887
	SLC29A4	589.684	-0.348402	0.095293	-3.65611	0.000256071	0.00266449
	KLK13	282.952	-0.439849	0.120333	-3.65525	0.000256928	0.0026712
	LIMK2	1358.32	0.255585	0.0699947	3.6515	0.000260718	0.00270836
	FAM98A	2542.11	0.19316	0.0529021	3.65127	0.000260952	0.00270856
	COL5A1	1314.14	-0.259458	0.0710841	-3.65002	0.000262222	0.0027195
	TTC39C	523.256	0.358592	0.0982651	3.64923	0.000263028	0.00272561
	ZNF697	2775.91	0.185708	0.0509089	3.64786	0.000264438	0.00273797
	STX10	2142.63	0.216905	0.0594689	3.64737	0.000264934	0.00274085
	TPM4	20316.5	-0.0970981	0.0266232	-3.64712	0.000265193	0.00274127
	PRKAB2	1248.4	0.261224	0.071689	3.64386	0.000268584	0.00277404
	LARP1	12050.3	-0.120527	0.0330891	-3.6425	0.000270002	0.0027864
	ACSL3	5096.25	0.14818	0.0407123	3.63969	0.000272972	0.00281474
	AKR1A1	2675.08	0.190862	0.0524493	3.63898	0.000273725	0.00282019
	IDO1	106.999	-0.50986	0.140249	-3.63539	0.000277565	0.00285742
	HOXC13	1535.14	-0.234531	0.064545	-3.6336	0.000279494	0.00287492
	LNX2	3275.13	-0.180146	0.0496204	-3.63047	0.000282901	0.0029076
	ZNF248	290.069	0.431669	0.118917	3.62999	0.000283431	0.00291066
	RPS15	6701.98	-0.1317	0.0362939	-3.62871	0.00028484	0.00292274
	TBX1	45.6013	-0.48693	0.134303	-3.62561	0.000288279	0.00295562
	HLTF	3610.11	0.170617	0.0470956	3.62278	0.000291455	0.00298575
	RDH11	2168.67	0.2114	0.0583609	3.62229	0.000292011	0.00298901
	ABCB6	511.153	-0.366739	0.101283	-3.62094	0.000293537	0.0030022
	AGPAT9	146.016	0.492192	0.136101	3.61639	0.000298746	0.00305298
	DCAF6	4181.61	0.158725	0.043929	3.61322	0.000302417	0.00308799
	MED24	1605.66	0.231486	0.0641354	3.60933	0.000306987	0.00313211
	CEP170B	3307.34	-0.170241	0.0471898	-3.60758	0.000309063	0.00315074
	MMADHC	2250.03	-0.204098	0.0566061	-3.60559	0.000311449	0.00317249
	AGL	1213.69	0.26528	0.0735815	3.60526	0.000311845	0.00317395
	EFEMP1	146.392	-0.4898	0.135891	-3.60435	0.000312933	0.00318245
	YBX2	290.344	0.429756	0.119262	3.60345	0.000314023	0.00319096
	BRAT1	2296.45	0.197048	0.054719	3.60109	0.00031688	0.00321739
	PITRM1	4112.3	-0.162381	0.045111	-3.59958	0.000318726	0.00323352
	ATP6V1H	1562.91	0.234467	0.065153	3.59872	0.000319788	0.00323773
	MXI1	1071.58	-0.268811	0.0746983	-3.59862	0.000319913	0.00323773
	TMEM219	711.04	-0.330725	0.0918933	-3.59901	0.000319426	0.00323773
	SERPINI1	60.1824	0.498357	0.138585	3.59603	0.000323106	0.00326742
	SCUBE3	44.6144	-0.47808	0.133057	-3.59303	0.00032685	0.00329998
	CDCA7	1795.04	0.219827	0.0611782	3.59322	0.000326618	0.00329998
	NAB1	1078.55	0.271584	0.075631	3.5909	0.000329537	0.00332426
	PALM	935.865	-0.291664	0.0812275	-3.59071	0.000329783	0.00332426
	PTK2	5793.47	0.13754	0.0383197	3.58927	0.000331606	0.00333728
	HMGB1	10315.8	-0.11426	0.0318323	-3.58945	0.000331373	0.00333728
	KANK2	482.696	-0.362448	0.100991	-3.58893	0.000332043	0.00333901
	HS6ST2	1202.29	-0.254774	0.07105	-3.58584	0.00033599	0.003376
	MTCH2	4081.11	0.159775	0.0445698	3.58482	0.000337314	0.0033866
	NOP14	1736.45	-0.219334	0.0611991	-3.58393	0.00033846	0.00339281
	AMOTL1	446.36	-0.372834	0.104032	-3.58384	0.000338579	0.00339281
	ADIRF	45.5664	0.48186	0.134458	3.58372	0.000338741	0.00339281
	ERLIN2	2154.11	0.204046	0.0569466	3.58312	0.000339512	0.00339782
	NCMAP	380.315	0.396262	0.110732	3.57855	0.000345502	0.00345502
	GPR156	61.2382	-0.496388	0.138721	-3.57832	0.000345806	0.00345531
	ARMC6	1525.08	-0.240497	0.0672232	-3.57759	0.000346771	0.00345946
	CELSR3	348.451	0.400728	0.112009	3.57765	0.0003467	0.00345946
	ANXA11	4920.21	0.145772	0.0407677	3.57567	0.000349332	0.00348225
	METTL12	308.248	0.417146	0.116686	3.57495	0.000350299	0.00348912
	FOXQ1	15.4032	-0.357598	0.100177	-3.56967	0.000357425	0.00355729
	CDCP1	2924.6	-0.177313	0.0497525	-3.5639	0.00036539	0.00363368
	ITGB2	216.408	0.456287	0.128171	3.55998	0.000370876	0.00368533
	RPL39	1051.97	0.270899	0.0761249	3.55861	0.000372816	0.00370168
	FAM188A	463.258	0.368185	0.103617	3.55333	0.000380386	0.00377386
	DMXL2	714.198	0.319983	0.0900702	3.5526	0.000381447	0.00378141
	ABCC3	90.4222	-0.500454	0.140917	-3.55141	0.000383179	0.00379558
	MYCL	1339.21	-0.243595	0.0686042	-3.55073	0.000384163	0.00380234
	TRANK1	54.0414	-0.486494	0.137029	-3.55031	0.000384779	0.00380544
	LZTR1	1233.51	0.261081	0.0735556	3.54943	0.000386064	0.00381515
	DLD	2159.55	0.198152	0.0558431	3.54838	0.000387611	0.00382743
	EVC	171.33	-0.470256	0.132541	-3.548	0.000388167	0.00382991
	HERC4	1196.25	0.259451	0.0732177	3.54355	0.00039478	0.00388966
	JPH2	924.463	-0.291227	0.082186	-3.54351	0.000394841	0.00388966
	ZNF853	77.3118	-0.498406	0.140746	-3.54117	0.000398361	0.00392126
	KRT7	25488.9	-0.109071	0.0308027	-3.54095	0.000398688	0.00392142
	LPCAT1	2666.38	0.184109	0.0520016	3.54045	0.00039945	0.00392584
	OPN3	1257	0.252231	0.0713077	3.53723	0.000404353	0.00397093
	ZNF521	903.773	-0.281826	0.0796864	-3.53668	0.000405183	0.00397598
	ST5	1024.68	-0.269589	0.0762389	-3.53611	0.000406068	0.00398156
	PDXK	3194.94	-0.168841	0.0477818	-3.53359	0.000409953	0.00401652
	MT-ND1	29589.3	-0.105012	0.0297253	-3.53276	0.000411244	0.0040229
	PRCP	1038.93	0.267249	0.0756482	3.53279	0.0004112	0.0040229
	TIMM13	1539.14	-0.236122	0.0668453	-3.53236	0.00041187	0.00402589
	FAM216A	423.375	0.375249	0.106243	3.53199	0.000412439	0.00402833
	PTP4A3	1118.53	-0.269086	0.0761976	-3.53143	0.000413325	0.00403385
	RGS11	210.819	-0.466684	0.132191	-3.53038	0.000414965	0.00404671
	CLK3	876.6	0.287681	0.0815146	3.52919	0.000416834	0.00406179
	C10orf35	644.691	-0.320164	0.0907431	-3.52824	0.000418325	0.00407316
	TIMMDC1	2004.7	0.205588	0.0583157	3.52543	0.000422799	0.00411355
	BRPF3	705.329	-0.310243	0.0880154	-3.52488	0.00042368	0.00411893
	MAP3K10	472.561	0.357798	0.10155	3.52338	0.000426084	0.00413339
	RNF19A	1782.75	0.214963	0.061009	3.52346	0.000425946	0.00413339
	B9D1	266.936	-0.4323	0.122696	-3.52333	0.000426153	0.00413339
	CD3EAP	1373.52	-0.24667	0.0700802	-3.51982	0.000431841	0.00418534
	SF1	6046.47	-0.140881	0.0400341	-3.51903	0.000433121	0.0041945
	KIAA0196	2552.4	0.185309	0.0526821	3.51749	0.000435651	0.00421576
	SMC5	2128.24	0.200318	0.0569827	3.51541	0.000439078	0.00424565
	TTC13	912.281	-0.280101	0.0797172	-3.51368	0.000441945	0.0042701
	DCAF7	3873.43	0.158719	0.0451943	3.51192	0.000444878	0.00429514
	MTO1	1384.8	0.239742	0.068355	3.50731	0.000452656	0.00436688
	SLC25A12	1857.33	0.212166	0.0605903	3.50165	0.000462392	0.00445739
	RRAGA	1826.13	0.215234	0.061502	3.49963	0.000465911	0.00448787
	GATA3	160.15	-0.468183	0.133926	-3.49582	0.000472602	0.00454884
	PPAPDC1B	743.404	-0.306341	0.0876626	-3.49454	0.000474876	0.00456723
	GDAP1	393.441	0.376765	0.107841	3.49371	0.000476356	0.00457797
	BRD2	4487.4	-0.148396	0.0425057	-3.4912	0.000480847	0.00461526
	EIF4E3	283.535	-0.417015	0.119464	-3.49073	0.000481704	0.00461526
	PTK7	2728.39	-0.180704	0.051764	-3.49092	0.000481357	0.00461526
	MRPL37	2316.65	-0.194536	0.0557246	-3.49102	0.000481174	0.00461526
	RAI1	3695.95	-0.159743	0.0457734	-3.48986	0.000483277	0.00462681
	DDB2	357.209	-0.38742	0.11109	-3.48744	0.00048767	0.00466531
	GPR125	936.955	-0.284051	0.0815086	-3.48493	0.000492272	0.00470577
	OXTR	44.7661	-0.466451	0.133901	-3.48355	0.000494809	0.00472642
	AES	5632.91	-0.139674	0.0401179	-3.48158	0.000498466	0.00475773
	SFXN5	274.974	-0.417867	0.120029	-3.48138	0.000498843	0.00475773
	VPS53	773.998	0.297723	0.0855618	3.47962	0.000502123	0.00478538
	TSC22D3	38.5931	0.454991	0.130768	3.47939	0.000502554	0.00478587
	DLX3	159.393	-0.466182	0.134023	-3.47837	0.000504471	0.00480049
	GLRX	68.3594	0.487535	0.140171	3.47815	0.00050489	0.00480085
	SETD1B	1580.88	-0.221005	0.0635546	-3.4774	0.000506294	0.00481056
	RAB11A	4220.86	0.148462	0.042704	3.47654	0.000507922	0.00482238
	GLA	648.972	0.316622	0.0910994	3.47557	0.000509774	0.00483632
	PTBP1	13842.5	-0.103337	0.0297389	-3.47481	0.000511209	0.00484627
	TNFAIP8L1	488.047	-0.355305	0.102313	-3.47273	0.0005152	0.00488044
	ERBB2IP	2035.44	0.199105	0.0573479	3.47188	0.000516819	0.00489209
	COL8A1	26.6192	-0.412245	0.118745	-3.47168	0.000517214	0.00489214
	AMER1	1312.12	-0.241274	0.0695126	-3.47094	0.000518636	0.00490191
	GGT7	452.683	0.358184	0.103276	3.46821	0.000523937	0.00494829
	NCBP1	3227.14	0.16884	0.0486875	3.46782	0.000524689	0.00494905
	MFSD1	1757.85	0.214303	0.0617986	3.46777	0.000524804	0.00494905
	ITGB5	1099.85	-0.264707	0.0763391	-3.46752	0.000525287	0.00494989
	SNRPD2	4744.49	0.150408	0.0433832	3.46697	0.000526367	0.00495636
	SPIRE1	1264.48	0.244608	0.0705673	3.46631	0.000527654	0.00496476
	IL17RD	1091.59	-0.269043	0.0776416	-3.46519	0.000529866	0.00498185
	CGREF1	805.601	-0.290315	0.0838244	-3.46337	0.00053345	0.0050118
	HS6ST1	2633.54	-0.180894	0.0522521	-3.46195	0.000536274	0.00503081
	PHF20	2307.23	0.195337	0.0564229	3.46202	0.000536138	0.00503081
	ANO6	2010.79	-0.200405	0.057896	-3.46146	0.000537255	0.00503626
	FAIM	215.06	-0.439479	0.127048	-3.45917	0.000541853	0.00507558
	DHX57	935.742	0.278977	0.0806667	3.45839	0.00054342	0.00508648
	DDHD2	3132.25	0.169765	0.0491142	3.45653	0.000547176	0.00511402
	PLA2G6	248.862	0.426392	0.123352	3.45672	0.000546798	0.00511402
	KLK8	996.383	-0.284975	0.0824661	-3.45567	0.000548937	0.00512667
	GPRIN1	537.125	-0.345158	0.099921	-3.45431	0.000551695	0.00514861
	NFKB1	1407.19	0.230248	0.0666614	3.45399	0.000552361	0.005151
	PIH1D1	1481.11	0.232645	0.0673858	3.45243	0.000555558	0.00517698
	RAB24	360.683	0.383126	0.11098	3.45219	0.00055605	0.00517773
	SNCA	80.3209	0.486448	0.140925	3.45182	0.000556825	0.00518111
	ABCC4	1237.76	-0.242268	0.0702017	-3.45103	0.000558452	0.0051924
	TMEM8B	301.689	0.404509	0.117223	3.45076	0.000559012	0.00519378
	TIMP2	2073.23	-0.199113	0.0577492	-3.4479	0.000564963	0.0052452
	PROKR2	143.414	0.472851	0.137378	3.44197	0.000577495	0.00535758
	RNF123	1038.4	0.259448	0.0753979	3.44105	0.00057946	0.00537185
	TOP1MT	1646.13	-0.216731	0.0630149	-3.43936	0.000583102	0.00539766
	SRRM3	133.603	-0.473521	0.137672	-3.43949	0.000582811	0.00539766
	SHC4	1034.33	0.26302	0.0764856	3.43882	0.000584266	0.00540446
	COASY	1435.92	0.237866	0.0691773	3.43849	0.000584964	0.00540695
	ARHGEF17	2454.6	-0.183975	0.0535349	-3.43654	0.000589199	0.00544209
	AGFG2	186.076	0.449238	0.130742	3.43607	0.000590217	0.00544438
	RBM15B	3218.57	-0.166678	0.0485091	-3.43603	0.000590312	0.00544438
	USP34	5367.1	-0.140908	0.0410192	-3.43516	0.000592199	0.00545778
	ZFP90	558.446	0.336572	0.0979906	3.43474	0.000593129	0.00546235
	CBLC	597.382	-0.32673	0.0952458	-3.43038	0.00060273	0.0055467
	RCN2	2119.44	0.200121	0.0583642	3.42884	0.000606173	0.00557431
	CPT1C	763.007	0.296391	0.0864886	3.42694	0.000610429	0.00560935
	NPDC1	1377.48	0.256556	0.074923	3.42426	0.000616469	0.00566072
	TSPAN15	1291	-0.240515	0.0702433	-3.42403	0.000616991	0.00566138
	PSMD14	2631.55	-0.179553	0.052475	-3.42168	0.000622348	0.00570637
	DDAH2	726.773	-0.299522	0.0875533	-3.42102	0.000623864	0.00571592
	SYNCRIP	8809.86	-0.112187	0.0327952	-3.42083	0.000624298	0.00571592
	SCN5A	83.0061	-0.481462	0.140773	-3.42013	0.000625917	0.00572657
	LRP5	3132.96	-0.167898	0.0491002	-3.4195	0.000627374	0.00573573
	STOM	1608.2	-0.221848	0.0648966	-3.41848	0.000629713	0.00575294
	MBOAT7	3068.47	0.173269	0.0506968	3.41776	0.000631387	0.00576404
	XPR1	1704.31	0.212321	0.0621419	3.41671	0.000633836	0.00578221
	KCMF1	1925.46	-0.201278	0.0589212	-3.41606	0.000635341	0.00579173
	KCNK5	455.644	-0.365408	0.107057	-3.41322	0.000641997	0.00584647
	LRP1	990.877	-0.27363	0.0801703	-3.4131	0.000642275	0.00584647
	PSPH	578.583	0.330428	0.0968353	3.41226	0.000644256	0.00586026
	MFSD6L	68.9735	-0.47815	0.140224	-3.4099	0.000649865	0.00590701
	MAP3K1	806.383	-0.286686	0.0841259	-3.40782	0.000654848	0.00594014
	C11orf54	515.573	0.339846	0.0997252	3.40782	0.000654842	0.00594014
	RNPEP	2574.67	-0.180394	0.0529358	-3.40778	0.000654926	0.00594014
	PCMT1	1938.15	0.204122	0.0599346	3.40574	0.000659839	0.00598039
	RPL15	11805.4	0.108412	0.031839	3.40499	0.000661653	0.00599251
	FBXO2	997.101	-0.260893	0.0766309	-3.40454	0.000662761	0.00599823
	MMACHC	291.858	0.400813	0.117746	3.40406	0.000663917	0.00599903
	PARM1	420.288	-0.364365	0.107055	-3.40352	0.000665234	0.00599903
	CD302	109.302	-0.475939	0.139833	-3.40362	0.000664994	0.00599903
	RAC1	11132.8	0.104177	0.0306029	3.40416	0.000663684	0.00599903
	BCL2L11	1433.5	-0.225138	0.0661481	-3.40354	0.000665175	0.00599903
	PLA2G12A	831.062	0.288469	0.0847881	3.40223	0.000668377	0.00602306
	DNAJA1	6420.94	-0.124384	0.0365651	-3.40173	0.000669608	0.00602983
	ARHGEF7	1517.28	0.225243	0.0662492	3.39994	0.000674015	0.00606084
	ALDH5A1	233.265	-0.426784	0.125525	-3.39999	0.000673894	0.00606084
	SERPINB1	390.401	-0.373056	0.109758	-3.39888	0.000676615	0.00607987
	PKP4	3956.59	0.149196	0.0439538	3.39438	0.000687853	0.00617644
	GABPB2	464.082	0.345868	0.101939	3.3929	0.000691576	0.00620544
	UPF2	2400.79	-0.191287	0.0563885	-3.3923	0.00069308	0.00621149
	C8orf33	3242.47	0.168446	0.0496563	3.39224	0.000693238	0.00621149
	TMEM50B	577.926	0.324926	0.0958461	3.39008	0.000698721	0.00625617
	GUSB	1362.05	-0.229227	0.0676674	-3.38755	0.000705207	0.00630975
	WBP1	656.869	0.310998	0.0918362	3.38645	0.000708043	0.00633062
	MBD3	2815.2	-0.171257	0.0505937	-3.38496	0.000711895	0.00636054
	DTNA	383.215	-0.367452	0.108677	-3.38113	0.000721871	0.00644509
	MCAM	98.3807	-0.475183	0.140592	-3.37986	0.000725223	0.00647043
	ARIH2	2430.83	0.180215	0.0533429	3.37842	0.000729032	0.00649981
	MATR3	8829.91	-0.117512	0.0347938	-3.37738	0.000731791	0.00651978
	SMEK2	2388	-0.186197	0.0551598	-3.3756	0.000736555	0.00655758
	RPL11	13510	-0.110887	0.0328524	-3.3753	0.000737354	0.00656005
	PSMB3	3032.13	-0.168991	0.0500881	-3.37388	0.000741155	0.00658921
	PRPF31	2028.73	0.193574	0.057396	3.37261	0.000744592	0.00661509
	PCBP2	7614.73	-0.124658	0.0369713	-3.37175	0.000746935	0.00663122
	GORASP2	18442	-0.089686	0.0266093	-3.37047	0.0007504	0.00665729
	ANO1	73.7576	-0.472936	0.140408	-3.36829	0.000756347	0.00670532
	DNAJC12	31.9095	0.41992	0.12469	3.3677	0.000757978	0.00671486
	RAB9A	464.2	0.343434	0.101984	3.36751	0.000758491	0.00671486
	NDUFV1	4294.25	0.150199	0.0446221	3.36602	0.000762615	0.00673978
	KIF7	23.8717	-0.388487	0.115406	-3.36627	0.000761919	0.00673978
	ELF5	3288.54	-0.158331	0.0470396	-3.36591	0.000762914	0.00673978
	IRF2BPL	869.573	-0.284266	0.0844783	-3.36496	0.00076554	0.00675824
	HIP1R	3743.87	-0.150469	0.04472	-3.36469	0.000766295	0.00676016
	KRT6B	6265.84	0.128603	0.0382332	3.36366	0.000769167	0.0067767
	GNAI3	4286.55	-0.145366	0.0432169	-3.36363	0.000769247	0.0067767
	BLOC1S6	1480.01	0.22541	0.0670333	3.36265	0.000771977	0.00679599
	ITGA9	294.111	-0.396569	0.117941	-3.36245	0.000772531	0.00679611
	GCNT1	295.57	0.396385	0.117948	3.36068	0.000777498	0.00683503
	GTSE1	772.714	-0.288134	0.0857503	-3.36015	0.000778991	0.00684337
	PNKD	1197.69	0.240059	0.0714545	3.35961	0.000780539	0.00685219
	ANKRD11	2533.23	-0.175543	0.0522676	-3.35854	0.000783562	0.00687347
	BZW2	4784.7	-0.136538	0.0406561	-3.35836	0.000784057	0.00687347
	TMEM25	1456.14	0.222442	0.0662636	3.35693	0.000788143	0.00690449
	LARS	7078.26	0.120909	0.0360303	3.35575	0.000791503	0.00692909
	CLK2	1829.61	0.211698	0.0631043	3.35474	0.000794404	0.00694966
	TPX2	5570.32	-0.134407	0.0400681	-3.35447	0.000795158	0.00695142
	EP300	2825.94	-0.172967	0.0516001	-3.35207	0.000802086	0.00700711
	RASSF8	393.299	-0.363004	0.108322	-3.35114	0.000804797	0.00702591
	SGK3	266.033	0.409135	0.122102	3.35075	0.000805917	0.00703081
	PDGFA	135.883	-0.45922	0.137095	-3.34966	0.000809103	0.00705004
	MAML1	2086.95	-0.192539	0.0574809	-3.34961	0.000809242	0.00705004
	CCDC146	112.47	0.470162	0.140416	3.34836	0.000812918	0.00707717
	APBB1	486.235	-0.345151	0.103089	-3.34809	0.000813694	0.00707903
	NNT	1264.2	0.2395	0.0715422	3.34767	0.000814943	0.0070801
	SLC39A4	1425.34	-0.227722	0.0680202	-3.34786	0.00081439	0.0070801
	SEPT3	1278.72	-0.233976	0.0699117	-3.34673	0.000817706	0.0070992
	TUBA1C	8948.3	-0.111548	0.0333454	-3.34523	0.000822155	0.0071329
	ARL10	293.412	-0.392309	0.117292	-3.34473	0.000823619	0.00714068
	MED15	1690.8	-0.206907	0.0618668	-3.3444	0.000824612	0.00714436
	HMGXB3	1935.17	0.202764	0.0606839	3.34131	0.000833835	0.0072193
	WDHD1	1052.63	0.257028	0.0769309	3.34102	0.0008347	0.00722182
	TGM5	128.029	-0.460476	0.137875	-3.3398	0.000838399	0.00724884
	CDC20	14275.7	-0.0954532	0.0285858	-3.33918	0.000840262	0.00725996
	ADAM10	3458.46	0.154711	0.0463368	3.33883	0.000841308	0.00726401
	RPL19	20099.9	-0.0960327	0.0287818	-3.33658	0.000848163	0.00731817
	H2AFY2	1425.33	-0.224072	0.0671739	-3.3357	0.00085086	0.00733641
	DCAKD	393.433	0.367309	0.110201	3.33307	0.000858926	0.00740088
	RP11-1220K2.2	1773.37	0.204088	0.0612592	3.33155	0.000863647	0.00743647
	MEPCE	2602.45	-0.17368	0.0521635	-3.32954	0.000869908	0.00748525
	NUDT5	2403.81	-0.178555	0.053633	-3.3292	0.000870967	0.00748925
	ITPR1	189.586	0.438398	0.131799	3.32627	0.000880159	0.00756312
	PSMA7	6556.93	-0.120524	0.0362441	-3.32533	0.00088315	0.00758363
	PDE4DIP	3613.4	0.157743	0.0474414	3.325	0.000884172	0.00758723
	FBXO33	339.696	0.374114	0.112584	3.32296	0.000890678	0.00763785
	PLOD1	2800.14	0.169336	0.0509937	3.32072	0.000897855	0.00769415
	YWHAG	18249.6	-0.0919334	0.0276899	-3.3201	0.000899845	0.00770256
	SNX18	1341.14	-0.230358	0.0693842	-3.32004	0.000900061	0.00770256
	MAN2C1	897.446	0.270842	0.0816139	3.31857	0.000904787	0.00773774
	WDR1	5019.58	-0.134585	0.0406003	-3.31488	0.000916816	0.00783529
	PGRMC1	6749.81	0.119351	0.0360232	3.31317	0.000922443	0.00787802
	MYO9B	3563.87	0.151192	0.0456549	3.31164	0.000927524	0.00791605
	UBAP2L	11170.9	-0.106966	0.0323107	-3.31055	0.000931117	0.00794132
	ZNF251	747.702	0.286724	0.0866312	3.30971	0.000933912	0.00795977
	FNDC1	268.336	-0.398348	0.120367	-3.30945	0.000934809	0.00796202
	EPHX2	183.659	-0.433518	0.131019	-3.30883	0.000936864	0.00797412
	RFX5	2358.91	0.181102	0.054755	3.30749	0.000941352	0.0080069
	TTF2	1054.07	0.250008	0.0756323	3.30558	0.000947817	0.00805644
	TOMM34	2107.43	0.18725	0.0567221	3.30118	0.000962791	0.0081782
	MTHFD1	4685.04	0.147511	0.0447107	3.29924	0.000969477	0.00822943
	PDCL3	772.679	-0.283372	0.0859041	-3.2987	0.000971353	0.0082398
	GNG11	293.612	0.39583	0.120079	3.29643	0.000979232	0.00830104
	LEPROT	1202.26	-0.236456	0.0717395	-3.29604	0.000980596	0.00830701
	DIP2A	1178.75	0.236258	0.0717136	3.29446	0.00098611	0.00834809
	NAT8L	890.103	-0.264015	0.0802231	-3.29101	0.000998301	0.00844561
	PATZ1	723.087	-0.288258	0.087606	-3.29039	0.0010005	0.00845854
	RIN3	346.272	-0.371164	0.112825	-3.28974	0.00100279	0.00847223
	MTFR1L	2112.27	0.19391	0.0589679	3.2884	0.0010076	0.00850713
	TMEM167B	1281.09	0.237401	0.0722209	3.28715	0.00101208	0.00853921
	DENND5B	177.179	0.433501	0.131917	3.28618	0.00101557	0.00856291
	ITPRIPL2	4617.13	-0.138694	0.0422157	-3.28537	0.00101848	0.00858172
	INHBA	31.484	0.407603	0.124097	3.28455	0.00102147	0.00860114
	HIST2H2BE	457.738	0.341061	0.10386	3.28383	0.00102405	0.00861708
	ARHGDIG	67.8175	-0.460204	0.140159	-3.28344	0.00102549	0.00862345
	SAMD1	1574.34	-0.208812	0.0636123	-3.28257	0.00102864	0.00864223
	LSS	3528.33	0.161587	0.0492277	3.28245	0.0010291	0.00864223
	TMA7	1043.26	0.248259	0.075652	3.28159	0.00103225	0.0086629
	WNT3	98.1711	-0.462363	0.140913	-3.28119	0.00103369	0.00866925
	PRKAR2A	3592.78	0.157027	0.047862	3.28082	0.00103507	0.008675
	NDUFB5	1255.54	0.229312	0.0699271	3.2793	0.00104065	0.00871596
	ARNT	2354.64	0.178536	0.0544578	3.27843	0.00104387	0.00873715
	PRR14	1258.43	0.230226	0.0702296	3.2782	0.00104472	0.00873845
	PIK3R4	1446.16	0.220901	0.0674159	3.27669	0.00105032	0.0087794
	ZMIZ2	4832	0.146027	0.0446419	3.27108	0.00107136	0.00894933
	SDC3	1078.13	-0.243526	0.0744676	-3.27023	0.00107459	0.0089704
	CHRAC1	1904.86	-0.193833	0.0593291	-3.26709	0.00108661	0.00906467
	POLR2B	6025.71	0.123416	0.0377852	3.26624	0.00108984	0.00908562
	ATP2C1	4691.67	0.135406	0.0415036	3.26252	0.00110426	0.00919764
	TLE1	3453.18	-0.154478	0.0473511	-3.2624	0.00110474	0.00919764
	MTSS1	112.279	-0.456398	0.140002	-3.25995	0.00111433	0.00927131
	NHLRC2	719.004	-0.288845	0.0886286	-3.25905	0.00111788	0.0092947
	PFKM	2313.88	0.17915	0.054982	3.25834	0.00112065	0.0093056
	ZDHHC24	270.769	-0.400146	0.122807	-3.25834	0.00112067	0.0093056
	HMHA1	1164.39	-0.246968	0.0758212	-3.25724	0.001125	0.00933539
	DGCR8	1108.17	-0.238823	0.073369	-3.2551	0.00113353	0.0094
	RAD50	1879.11	0.203529	0.0625328	3.25476	0.00113488	0.00940498
	PSME1	1813.26	0.201631	0.0619569	3.25438	0.00113639	0.0094113
	ABCA7	570.503	0.322178	0.0990054	3.25415	0.00113734	0.00941296
	DAPP1	229.99	0.411778	0.12657	3.25337	0.00114043	0.00943235
	STX16	1602.9	0.205385	0.063168	3.25141	0.00114836	0.00949169
	FAM120C	565.872	0.311336	0.0957911	3.25016	0.00115341	0.00952089
	LMX1B	849.666	-0.269528	0.0829269	-3.25019	0.00115328	0.00952089
	IGSF9	2498.41	-0.175257	0.0539333	-3.24951	0.00115604	0.00953271
	ABHD11	1645.6	0.203683	0.0626826	3.24943	0.00115635	0.00953271
	YES1	8434.94	-0.112077	0.0344952	-3.24906	0.00115785	0.00953882
	LIMD2	200.696	-0.418112	0.128726	-3.24809	0.00116184	0.0095467
	SLC10A4	72.7146	-0.455955	0.140354	-3.2486	0.00115973	0.0095467
	HDGFRP3	383.275	-0.358742	0.110443	-3.24821	0.00116135	0.0095467
	DPP9	1894.34	0.194265	0.0598074	3.24817	0.0011615	0.0095467
	WDR47	1056.31	0.249416	0.0768036	3.24746	0.00116442	0.00956159
	C19orf53	2972.17	-0.170401	0.0525152	-3.24479	0.00117537	0.0096452
	CTBP2	4395.38	-0.142409	0.043903	-3.24372	0.00117978	0.0096751
	RGS10	1597.75	0.20816	0.0641875	3.243	0.00118278	0.00969342
	MAP4K4	2898.62	-0.160267	0.0495273	-3.23594	0.00121243	0.00992997
	KLHDC2	1134.98	0.2369	0.0732454	3.23434	0.00121925	0.00997931
	CTSZ	1300.59	-0.22601	0.069904	-3.23315	0.00122434	0.0100144
	KIAA0226	1193.01	0.23433	0.0725051	3.23191	0.00122966	0.0100448
	NINL	469.566	-0.334982	0.103647	-3.23196	0.00122945	0.0100448
	ZBED6CL	61.0353	-0.449298	0.139047	-3.23128	0.00123239	0.0100606
	TMEM63C	706.25	-0.306103	0.0947637	-3.23017	0.00123715	0.0100929
	TPRG1L	1904.31	0.190417	0.0589721	3.22893	0.00124252	0.0101302
	FAM101A	38.5296	0.422058	0.130813	3.22642	0.00125351	0.0102132
	AKNA	452.368	-0.335118	0.103885	-3.22584	0.00125605	0.0102272
	TRAM2	289.729	-0.38193	0.118442	-3.22463	0.00126137	0.010264
	SMIM14	1169.31	0.238144	0.0738574	3.22438	0.00126244	0.010266
	BCL6	863.255	-0.261547	0.0811333	-3.22366	0.00126562	0.0102852
	PER1	241.306	0.405055	0.125702	3.22236	0.00127141	0.0103256
	KIAA0319L	1044.07	0.245045	0.0760755	3.22108	0.00127708	0.0103649
	VAMP4	347.877	0.361441	0.112255	3.21981	0.00128274	0.0104042
	ADNP	4782.86	-0.130891	0.040668	-3.21853	0.0012885	0.0104441
	TRIP6	2656.04	0.176154	0.0547468	3.2176	0.00129267	0.0104712
	PARP1	12606.9	0.097611	0.0303634	3.21476	0.00130553	0.0105686
	EPS8L1	350.825	-0.358885	0.111648	-3.21442	0.00130706	0.0105742
	SMAD6	495.28	-0.320996	0.0998728	-3.21405	0.00130878	0.0105813
	TRRAP	2832.7	-0.162366	0.05053	-3.21326	0.00131239	0.0106036
	SLC15A4	794.832	-0.269777	0.0839736	-3.21265	0.00131519	0.0106194
	TRPM6	37.712	0.417462	0.129958	3.21228	0.00131686	0.0106261
	PPP2R5B	289.866	0.379212	0.118061	3.21199	0.00131821	0.0106302
	RORC	32.3731	0.404884	0.126119	3.21034	0.00132579	0.0106844
	PSD4	1062.64	-0.242569	0.0755654	-3.21006	0.0013271	0.0106864
	BAZ2A	4663.41	-0.139045	0.0433212	-3.20963	0.00132906	0.0106864
	ABCA13	191.489	0.41721	0.129979	3.20982	0.00132816	0.0106864
	FAM65A	715.183	-0.285238	0.0888716	-3.20955	0.00132943	0.0106864
	ATOX1	670.802	0.289451	0.090196	3.20914	0.00133135	0.0106887
	KIF5B	8909.55	-0.107212	0.0334085	-3.20912	0.00133141	0.0106887
	EDEM3	1827.71	0.195611	0.0610109	3.20617	0.00134515	0.0107921
	UNC5C	87.3071	-0.451639	0.140948	-3.2043	0.00135393	0.0108556
	CERCAM	1265.41	0.229744	0.0717298	3.20292	0.00136044	0.0109008
	KLF11	1278.6	-0.224035	0.0699536	-3.20262	0.00136184	0.0109051
	B2M	8814.06	0.104552	0.0326643	3.2008	0.00137047	0.0109673
	TCTN3	633.697	0.300497	0.0939486	3.19853	0.0013813	0.0110468
	FAR1	2538.19	0.169908	0.0531341	3.19773	0.00138516	0.0110707
	SH3BGRL3	4383.12	-0.135145	0.0422753	-3.19678	0.00138973	0.0111002
	TMEM80	390.764	0.345606	0.108142	3.19586	0.00139414	0.0111283
	NAA35	1488.9	-0.210717	0.0659462	-3.19529	0.00139691	0.0111364
	CACNG4	42.1866	-0.415884	0.130154	-3.19533	0.00139673	0.0111364
	LCA5	245.09	0.39552	0.123795	3.19496	0.0013985	0.0111419
	PNMAL1	115.807	-0.444282	0.139179	-3.19216	0.00141212	0.0112433
	NRG2	96.865	0.449917	0.140957	3.19187	0.00141357	0.0112477
	PSEN2	468.425	-0.324012	0.10158	-3.18973	0.00142406	0.0113212
	GPAA1	6026.79	-0.133056	0.0417152	-3.18962	0.0014246	0.0113212
	MT-ND4	159080	0.158928	0.0498696	3.18686	0.00143824	0.0114224
	TPCN1	627.159	0.300091	0.0941703	3.18668	0.00143915	0.0114224
	RRAGD	276.457	0.387987	0.121776	3.18606	0.00144225	0.0114326
	EPCAM	11292.1	-0.0977815	0.0306896	-3.18614	0.00144185	0.0114326
	TMEM167A	1532.43	0.205781	0.0646202	3.18447	0.00145021	0.0114884
	C1orf186	29.965	-0.394038	0.123792	-3.18306	0.00145727	0.0115371
	EIF4A1	13372.6	-0.0918408	0.0288621	-3.18206	0.00146232	0.0115654
	RNF222	50.9305	0.432472	0.135913	3.18199	0.00146268	0.0115654
	GOT1	886.201	0.264029	0.0829902	3.18145	0.0014654	0.0115725
	VCPIP1	1604.72	0.200792	0.0631134	3.18145	0.00146542	0.0115725
	SH3PXD2A	1259.99	-0.224634	0.0706267	-3.18058	0.00146982	0.0115999
	GIPC1	10828.6	-0.105422	0.0331577	-3.17942	0.00147569	0.011639
	NCAPG2	2217.18	-0.179587	0.0564928	-3.17893	0.00147818	0.0116513
	TACR1	101.463	-0.446812	0.140575	-3.17846	0.00148059	0.011663
	MYL12A	11331.7	0.0970275	0.0305326	3.17784	0.00148378	0.0116808
	SVIL	3055.24	-0.154812	0.0487404	-3.17626	0.00149187	0.0117371
	SOWAHC	1282.38	-0.222636	0.0701411	-3.17411	0.00150295	0.011817
	FAM73B	619.133	0.308781	0.0972927	3.17373	0.00150493	0.0118251
	CDKN1A	68.5869	-0.444638	0.140208	-3.17127	0.00151773	0.0119182
	PLXNA1	4996.04	-0.132009	0.0416457	-3.16981	0.00152537	0.0119708
	ABL2	2630.08	-0.168122	0.0530724	-3.16779	0.00153602	0.0120468
	TNS4	71.745	-0.444435	0.140399	-3.16551	0.00154813	0.0121281
	HTR6	184.37	-0.423738	0.133862	-3.16547	0.0015483	0.0121281
	DNPH1	364.283	-0.351605	0.111084	-3.16523	0.0015496	0.0121306
	ZNF146	5987.46	0.120736	0.0381472	3.165	0.00155081	0.0121326
	ACTN4	20183.5	0.0843411	0.0266537	3.16434	0.00155437	0.0121378
	RASAL2	3282.44	-0.154217	0.0487339	-3.16448	0.00155362	0.0121378
	ANKRD33B	160.046	-0.426304	0.134713	-3.16454	0.00155326	0.0121378
	PRKAR2B	520.348	-0.31366	0.0991348	-3.16397	0.00155633	0.0121455
	LPL	1739.19	-0.199852	0.0631792	-3.16325	0.00156018	0.012168
	LIMCH1	1067.4	0.236586	0.0748158	3.16225	0.00156557	0.0122025
	WRB	446.164	0.329188	0.104106	3.16204	0.00156667	0.0122036
	S100A6	7929.86	0.107534	0.0340111	3.16173	0.00156836	0.0122091
	MRPL24	1832.52	0.190968	0.0604088	3.16125	0.00157091	0.0122215
	MED17	1374.47	0.21588	0.0683	3.16076	0.0015736	0.0122348
	AGO2	2540.34	-0.165054	0.0522515	-3.15884	0.00158401	0.0123081
	C9orf41	809.625	0.266396	0.0844108	3.15594	0.00159979	0.0124231
	AQP3	1330.57	0.222832	0.0706149	3.15559	0.00160173	0.0124304
	TCOF1	4868.74	-0.129279	0.0409719	-3.15531	0.00160329	0.0124349
	AKT3	2522.65	-0.167711	0.0531567	-3.15503	0.00160482	0.0124391
	ARHGEF3	478.479	-0.318661	0.101042	-3.15374	0.00161191	0.0124864
	RNASEH2B	193.611	-0.40907	0.12972	-3.15349	0.0016133	0.0124894
	ACTR1A	2735.38	0.16078	0.0509917	3.15306	0.00161566	0.0125
	TCEANC2	403.717	0.338287	0.107368	3.15072	0.00162871	0.0125932
	SOX5	71.0875	0.442496	0.140455	3.15044	0.00163022	0.0125972
	SSBP1	1887.78	-0.203335	0.0645533	-3.14988	0.0016334	0.012614
	SYBU	385.883	0.342776	0.108845	3.14921	0.00163715	0.0126352
	PTPN2	2222.18	-0.176189	0.0559629	-3.14831	0.00164215	0.012666
	PEX26	933.042	-0.252653	0.08028	-3.14715	0.00164872	0.0127089
	ZNF512B	1637.73	0.199596	0.0634486	3.14578	0.00165643	0.0127605
	SSR4	2468.9	0.167382	0.0532128	3.14551	0.00165795	0.0127644
	ERMP1	1368.17	0.212588	0.0676124	3.14422	0.00166532	0.0128133
	RCC2	8326.96	-0.104671	0.0333156	-3.14179	0.0016792	0.0129122
	RPL32	13602.2	-0.0918597	0.0292423	-3.14133	0.00168182	0.0129244
	PICALM	5063.17	0.126902	0.0404146	3.14	0.00168948	0.0129595
	STARD3	578.225	0.29645	0.0944094	3.14005	0.0016892	0.0129595
	PRPF4	1698.4	0.201622	0.0642046	3.14031	0.0016877	0.0129595
	MAN2A2	1781.26	0.204619	0.0651758	3.1395	0.00169239	0.012974
	PCNT	3084.88	-0.159798	0.0509185	-3.13831	0.00169928	0.0130188
	SLC2A11	155.581	0.42507	0.135501	3.13702	0.00170674	0.0130625
	ABTB1	217.103	-0.397115	0.126592	-3.13697	0.00170705	0.0130625
	EVA1C	492.992	0.313587	0.0999915	3.13613	0.00171191	0.0130917
	DDRGK1	1236.79	-0.233816	0.0745836	-3.13495	0.00171881	0.0131364
	NLN	1502.08	0.205912	0.0657254	3.13292	0.00173077	0.0132198
	SEPP1	80.1232	0.441287	0.140879	3.13238	0.00173395	0.0132361
	GET4	2320.75	-0.180527	0.0576369	-3.13214	0.00173536	0.013237
	ZFP41	578.028	-0.298991	0.0954631	-3.132	0.00173617	0.013237
	LPPR3	381.154	-0.342521	0.109373	-3.13169	0.00173803	0.0132376
	ATP6AP1	2499.45	0.170389	0.0544089	3.13163	0.00173836	0.0132376
	WWC2	1513.41	-0.202158	0.0645996	-3.1294	0.00175163	0.0133306
	GLTP	615.299	0.288765	0.0923116	3.12816	0.00175904	0.0133738
	LRRC8E	531.999	-0.315729	0.100933	-3.12809	0.00175944	0.0133738
	UBC	7119.38	-0.110662	0.0353815	-3.12768	0.00176192	0.0133846
	BCLAF1	7021.19	-0.112441	0.0359667	-3.12626	0.00177047	0.0134414
	CP	108.946	-0.436799	0.139745	-3.12568	0.00177392	0.0134596
	PARVB	559.642	-0.298829	0.0956181	-3.12523	0.00177663	0.013472
	ANKRD9	467.531	0.330125	0.105679	3.12386	0.00178495	0.0135159
	MCM4	12414.2	-0.100144	0.0320574	-3.12391	0.00178468	0.0135159
	PLEKHA5	447.417	-0.324497	0.103881	-3.12375	0.00178564	0.0135159
	LZTS3	1719.5	-0.2059	0.0659668	-3.12127	0.00180071	0.0136217
	TFCP2L1	1775.31	-0.191869	0.0615106	-3.11929	0.00181288	0.0136973
	NEURL4	963.179	0.243749	0.0781397	3.1194	0.00181219	0.0136973
	PARVA	1034.83	-0.238761	0.076549	-3.11906	0.00181426	0.0136995
	MCCC1	1313.62	0.220984	0.0708645	3.1184	0.00181834	0.0137216
	PCNXL4	1279.56	0.222596	0.0713853	3.11824	0.00181937	0.0137216
	PHYKPL	265.226	-0.377109	0.121018	-3.11614	0.00183236	0.0138113
	BAG3	1464.73	0.206748	0.0663973	3.1138	0.00184692	0.0139127
	HNRNPK	21685.2	-0.0825469	0.0265199	-3.11264	0.00185424	0.0139595
	KIFC1	1973.17	-0.181841	0.0584301	-3.11211	0.00185755	0.0139761
	CRY2	296.269	0.367004	0.117968	3.11105	0.00186422	0.0140179
	MCCC2	1251.55	0.220333	0.0708402	3.11028	0.00186909	0.0140435
	PCGF5	605.097	-0.288679	0.0928181	-3.11016	0.00186986	0.0140435
	WDR12	1180.96	0.222861	0.0716951	3.10846	0.00188068	0.0141163
	ADD2	2345.34	-0.169966	0.0547171	-3.10627	0.00189461	0.0142124
	GBAS	1496.32	-0.219861	0.0708173	-3.10462	0.00190527	0.0142838
	KDM3B	3035.8	-0.153288	0.0493794	-3.1043	0.00190732	0.0142907
	SRCAP	4906.8	-0.131333	0.0423233	-3.10308	0.00191518	0.014341
	PHF8	1853.07	0.184661	0.0595162	3.10271	0.00191757	0.0143504
	MSTO1	772.014	0.264367	0.0852948	3.09945	0.0019388	0.0144852
	GSAP	184.021	-0.405769	0.130916	-3.09945	0.00193881	0.0144852
	PML	1621.37	-0.195815	0.0631782	-3.09942	0.00193903	0.0144852
	CEP97	788.634	0.261337	0.0843384	3.09867	0.00194392	0.014513
	MAPK15	579.421	0.310135	0.100093	3.09847	0.0019452	0.014514
	ENSA	6520.01	-0.115527	0.0372914	-3.09794	0.00194873	0.0145317
	GSDMD	1535.06	-0.202013	0.0652134	-3.09772	0.00195016	0.0145338
	ZNF587B	362.856	-0.345864	0.111666	-3.0973	0.00195294	0.0145459
	CTC1	897.666	0.247602	0.0799759	3.09596	0.00196176	0.0146029
	RBMS2	612.952	0.289554	0.0935455	3.09533	0.00196595	0.0146254
	CHST12	575.793	-0.317164	0.102485	-3.09473	0.00196994	0.0146464
	GOPC	1796.84	0.202428	0.0654181	3.09437	0.00197231	0.0146555
	C4orf3	1073.95	0.230576	0.0745292	3.09376	0.00197635	0.0146768
	TRIO	2318.86	-0.168968	0.0546366	-3.09258	0.00198423	0.0147266
	WDR6	4358.06	-0.142167	0.0459744	-3.0923	0.00198615	0.0147322
	BAMBI	1022.12	0.253554	0.0820082	3.09181	0.00198942	0.0147478
	TRAF3	1855.14	0.186696	0.0604069	3.09064	0.00199727	0.0147972
	PRKRA	1008.87	-0.248534	0.0804293	-3.09009	0.00200099	0.014816
	ATP10A	262.378	-0.376152	0.121743	-3.08972	0.00200348	0.0148258
	TOMM40L	796.234	0.259184	0.0839533	3.08724	0.00202024	0.01491
	NEURL1B	526.169	-0.30465	0.0986707	-3.08754	0.00201819	0.01491
	CCL28	1808.4	-0.188688	0.0611191	-3.08723	0.00202033	0.01491
	EVPL	1112.35	-0.236763	0.0766928	-3.08716	0.00202079	0.01491
	THRB	61.0611	-0.429395	0.139082	-3.08736	0.00201941	0.01491
	NLRC5	253.196	-0.376834	0.122073	-3.08695	0.00202223	0.0149119
	LAP3	1395.58	-0.209203	0.0678008	-3.08555	0.00203178	0.0149735
	B4GALNT4	2043.1	-0.181814	0.0589606	-3.08365	0.00204477	0.0150605
	PLXNA3	2854.2	0.169947	0.0551213	3.08315	0.0020482	0.0150768
	CDK2AP2	1173.48	0.221243	0.0718145	3.08076	0.00206473	0.0151897
	SDC4	2961.08	0.151229	0.0491691	3.07569	0.00210019	0.0154415
	PRICKLE2	312.824	0.357893	0.116397	3.07476	0.0021067	0.0154623
	CUL9	581.822	0.291368	0.0947611	3.07476	0.00210669	0.0154623
	SLC9A7	497.417	0.309483	0.100646	3.07495	0.00210535	0.0154623
	SPOCK2	294.654	0.362302	0.117945	3.07179	0.00212777	0.0156066
	CDKN1B	1527.34	0.206568	0.0672502	3.07163	0.00212891	0.0156066
	TMEM14C	1199.45	0.222453	0.0724258	3.07147	0.00213009	0.0156066
	FRK	656.697	0.279736	0.0911124	3.07023	0.00213893	0.0156623
	CDCA7L	2110.05	-0.181177	0.0590204	-3.06973	0.0021425	0.0156793
	HEY2	2873.31	-0.16082	0.0524646	-3.0653	0.00217453	0.0159044
	AMT	79.1029	0.43125	0.14073	3.06439	0.00218113	0.0159434
	TMEM38B	744.893	0.268775	0.0877252	3.06383	0.00218526	0.0159643
	REL	896.634	0.252613	0.08246	3.06346	0.00218794	0.0159746
	RARRES1	3811.93	0.143282	0.0467964	3.06181	0.0022	0.0160348
	POLR1E	1573.95	-0.196665	0.0642295	-3.0619	0.00219935	0.0160348
	F2RL3	79.7221	-0.431476	0.140911	-3.06205	0.00219829	0.0160348
	ESR1	217.49	0.388018	0.12684	3.05911	0.00221992	0.0161706
	PEX6	760.812	0.261785	0.0855813	3.0589	0.00222151	0.0161728
	EFNA1	4505.69	-0.129102	0.0422137	-3.0583	0.002226	0.0161961
	AS3MT	36.0548	-0.394435	0.129138	-3.05437	0.00225533	0.0164
	EIF2B1	918.805	0.245219	0.0803098	3.05341	0.00226258	0.0164082
	ELFN2	50.241	-0.413271	0.13535	-3.05336	0.00226297	0.0164082
	SPHK1	90.6509	-0.430512	0.140966	-3.05401	0.00225802	0.0164082
	NSMF	2250.13	-0.176279	0.0577313	-3.05344	0.00226236	0.0164082
	PLK1	2642.04	-0.164206	0.0537721	-3.05374	0.00226008	0.0164082
	OSBPL1A	3309.8	-0.147354	0.0482743	-3.05242	0.00227002	0.0164498
	NCOA5	1532.35	-0.197368	0.0647226	-3.04945	0.0022926	0.0166039
	ACKR2	976.34	-0.241457	0.0792449	-3.04697	0.00231163	0.0167321
	DESI1	1561.64	0.195987	0.0643283	3.04667	0.00231388	0.0167387
	DBN1	5047.22	-0.12124	0.0398183	-3.04484	0.00232801	0.0168312
	FLOT2	2324.46	-0.165489	0.0543726	-3.0436	0.00233764	0.0168811
	SLC12A4	451.921	-0.315462	0.103645	-3.04369	0.00233698	0.0168811
	EMILIN2	30.3794	-0.378424	0.124341	-3.04344	0.00233893	0.0168811
	PDLIM1	1741.18	-0.192035	0.0631026	-3.04322	0.00234062	0.0168836
	WDR43	3541.6	-0.144861	0.0476254	-3.04167	0.00235269	0.016961
	PUF60	8377.9	-0.101441	0.0333548	-3.04128	0.00235576	0.0169734
	SAMHD1	1713.08	0.203694	0.0669871	3.04079	0.00235955	0.016991
	ZNF37A	711.649	-0.280305	0.0922508	-3.03851	0.00237748	0.0171102
	SUN2	3314.72	-0.145149	0.047774	-3.03825	0.00237957	0.0171155
	IGF2BP3	3221.91	-0.144894	0.047696	-3.03786	0.00238267	0.017128
	CCDC41	439.403	0.317344	0.1045	3.03678	0.00239123	0.0171797
	IGFBP7	63.3766	-0.422628	0.139186	-3.03643	0.002394	0.0171898
	TNS1	94.1527	-0.427937	0.14095	-3.03609	0.0023967	0.0171994
	DYNC1I1	89.6293	-0.427692	0.140893	-3.03559	0.00240069	0.0172181
	VPS52	1006.39	0.236099	0.0777862	3.03523	0.00240351	0.0172194
	JAG1	5541.59	-0.11662	0.0384223	-3.03522	0.00240359	0.0172194
	MSL1	2080.74	-0.172795	0.0569458	-3.03439	0.00241025	0.0172572
	ACSL5	92.994	0.427085	0.14092	3.03068	0.00244001	0.0174604
	ABCA2	2289.47	-0.17317	0.0571643	-3.02934	0.00245086	0.0175258
	USP18	204.102	-0.388996	0.128415	-3.02921	0.00245194	0.0175258
	PAWR	1663.11	-0.199607	0.0659336	-3.0274	0.00246671	0.0176213
	COL16A1	72.1914	0.424072	0.140095	3.02703	0.0024697	0.0176327
	TIAM2	259.794	-0.3687	0.121825	-3.02646	0.00247432	0.0176557
	MYH14	6285.97	-0.120289	0.0397681	-3.02476	0.00248833	0.0177355
	PABPC4	17873	0.0816368	0.0269887	3.02485	0.00248758	0.0177355
	LOXL3	200.402	-0.389568	0.128847	-3.0235	0.00249872	0.0177971
	RASSF4	343.04	0.341721	0.113027	3.02336	0.00249981	0.0177971
	SLC9A8	738.902	-0.262238	0.0867553	-3.02273	0.00250507	0.0178245
	DNAH11	80.5153	0.425236	0.140692	3.02245	0.00250735	0.0178306
	ELL2	234.594	0.376506	0.124615	3.02135	0.0025165	0.0178856
	ACSL4	669.415	0.274269	0.0907844	3.0211	0.00251855	0.0178901
	SMARCB1	1658.95	-0.203198	0.0672698	-3.02065	0.00252233	0.0178973
	PAQR8	67.2191	-0.421441	0.139521	-3.02064	0.00252241	0.0178973
	ZNF703	296.574	-0.362291	0.11996	-3.02009	0.00252698	0.0179197
	PBX1	4594.41	-0.128449	0.0425425	-3.01932	0.00253341	0.0179551
	MOV10	1206.04	-0.214142	0.07094	-3.01863	0.00253918	0.0179858
	MPDU1	885.981	-0.243325	0.0806899	-3.01556	0.00256504	0.0181588
	USP5	2665.63	0.154601	0.0513012	3.0136	0.0025817	0.0182562
	TOP2A	9073.59	-0.108024	0.0358437	-3.01374	0.00258052	0.0182562
	NIPAL3	2024.74	0.176237	0.0585072	3.01222	0.00259343	0.0183288
	SNX13	1064.01	0.226689	0.0752917	3.01081	0.00260552	0.0183937
	ACTR3C	37.0758	-0.390827	0.129806	-3.01085	0.00260514	0.0183937
	IGFL1	111.776	-0.420004	0.139526	-3.01021	0.00261065	0.0184195
	PPME1	1936.65	0.186996	0.0621323	3.00963	0.00261563	0.0184443
	ASPHD1	227.747	0.376801	0.125214	3.00925	0.00261889	0.018457
	EI24	2496.28	0.161349	0.0536316	3.00848	0.00262559	0.0184769
	BAG2	594.517	-0.282	0.0937397	-3.00834	0.00262683	0.0184769
	PPIA	12672.8	-0.0885656	0.0294412	-3.00822	0.0026278	0.0184769
	FTO	500.84	0.302352	0.100513	3.00808	0.00262906	0.0184769
	ANXA1	9536.25	-0.107828	0.0358392	-3.00866	0.00262403	0.0184769
	METRNL	525.96	-0.294897	0.0980869	-3.00648	0.00264287	0.0185598
	ELMO3	947.167	-0.240084	0.0798581	-3.00638	0.00264381	0.0185598
	CCDC97	1167.94	-0.222967	0.0742078	-3.00463	0.00265901	0.0186561
	NECAP2	1112.66	0.222689	0.0741235	3.00429	0.00266198	0.0186665
	PRSS53	184.428	0.392764	0.130778	3.00328	0.00267085	0.0187079
	LSM14A	4624.22	-0.136017	0.0452889	-3.00332	0.0026705	0.0187079
	GHR	39.3068	0.393699	0.131128	3.00239	0.00267871	0.0187524
	FAM208B	4880.82	-0.125557	0.0418276	-3.00177	0.00268414	0.01878
	CAMKMT	230.164	0.374507	0.12478	3.00133	0.002688	0.0187966
	RALY	4193.79	-0.133907	0.0446488	-2.99912	0.00270765	0.0189235
	TMEM50A	2500.94	0.158474	0.0528653	2.99769	0.00272031	0.0190014
	TSEN34	2539.25	0.156947	0.0523593	2.99751	0.00272199	0.0190026
	ADAM12	582.982	0.28462	0.0950368	2.99485	0.00274584	0.0191518
	CCT6A	9658.8	-0.094958	0.0317099	-2.99459	0.00274818	0.0191518
	TMPO	4510.8	-0.128412	0.0428833	-2.99444	0.00274946	0.0191518
	MTIF3	2275.91	-0.1655	0.055266	-2.9946	0.00274804	0.0191518
	CEP85	3755.4	0.135416	0.0452468	2.99284	0.00276394	0.019242
	LINC00998	445.963	0.309668	0.103485	2.99241	0.00276783	0.0192584
	UQCRQ	1789.78	0.189971	0.0634931	2.992	0.00277159	0.0192739
	MOB1A	4742.01	0.133427	0.0445977	2.9918	0.0027734	0.0192759
	MESDC1	551.866	-0.289995	0.0969898	-2.98996	0.00279018	0.0193818
	PARP2	641.423	0.27227	0.0910754	2.9895	0.00279435	0.0193894
	LPIN3	469.319	0.305236	0.102099	2.98962	0.00279323	0.0193894
	CA2	261.098	0.367632	0.12299	2.98913	0.00279771	0.0194015
	PLCE1	1219.61	-0.21112	0.0706329	-2.98897	0.00279918	0.0194015
	LACTB	270.646	0.358956	0.120122	2.98827	0.00280561	0.0194335
	PI4KA	2230.7	0.169606	0.05676	2.98813	0.00280689	0.0194335
	UBE2Q2	1523.15	-0.194347	0.0650674	-2.98685	0.00281864	0.0195041
	GPR157	1230.27	0.211929	0.0709772	2.98587	0.00282773	0.0195562
	EIF4G1	23725.9	-0.0742724	0.0248788	-2.98537	0.00283237	0.0195668
	MPV17L2	381.554	0.325704	0.109098	2.98542	0.00283185	0.0195668
	LSM10	447.502	0.308722	0.103445	2.98441	0.00284124	0.0196174
	AP1B1	2602.32	0.156627	0.0525071	2.98296	0.00285476	0.0196999
	CDKN2A	4362.12	0.139761	0.0468766	2.98146	0.00286882	0.0197536
	CCNB1	2478.41	-0.167384	0.0561334	-2.9819	0.0028647	0.0197536
	RNF220	2002.59	-0.176217	0.059098	-2.98177	0.00286584	0.0197536
	PAK6	274.387	-0.356181	0.119463	-2.98152	0.00286823	0.0197536
	MAD2L2	967.167	-0.233287	0.0782542	-2.98114	0.00287174	0.0197628
	PRADC1	236.934	0.371074	0.124492	2.9807	0.00287592	0.0197808
	EIF1	5538.17	-0.119732	0.0401733	-2.98038	0.00287889	0.0197904
	ARHGAP28	1279.23	-0.213177	0.0715525	-2.97931	0.00288899	0.019849
	IVD	1124.23	0.221709	0.0744365	2.9785	0.00289667	0.0198909
	HAP1	94.0116	-0.419368	0.140815	-2.97815	0.00289992	0.0198915
	ARL1	1650.82	0.186943	0.0627713	2.97815	0.00289992	0.0198915
	TSPAN17	968.866	-0.236463	0.0794077	-2.97783	0.00290299	0.0199017
	MAPK12	560.986	-0.291554	0.0979185	-2.97752	0.00290595	0.0199111
	FBLN7	474.028	-0.303254	0.10188	-2.97657	0.00291489	0.0199615
	TRIB1	2525.68	0.157922	0.0530796	2.97519	0.00292809	0.020041
	ATF5	698.264	-0.262733	0.088313	-2.97502	0.00292968	0.020041
	COPS8	623.103	0.276826	0.0930666	2.9745	0.0029347	0.0200644
	MPRIP	8432.91	0.106635	0.0358721	2.97263	0.00295258	0.0201749
	CBLB	296.643	0.355488	0.119593	2.97248	0.00295407	0.0201749
	C14orf142	293.274	0.351	0.118094	2.97222	0.00295655	0.0201809
	CCNB1IP1	953.889	0.233045	0.0784229	2.97165	0.00296205	0.0202075
	E2F2	2898.42	-0.1479	0.0497813	-2.97099	0.00296843	0.02024
	IFNLR1	89.5035	-0.418603	0.14096	-2.96966	0.0029813	0.0203168
	ARAP3	24.4323	-0.346357	0.116659	-2.96898	0.00298794	0.02034
	SLC25A29	1336.66	0.331003	0.111486	2.96902	0.0029875	0.02034
	KIAA1217	1157.5	0.215301	0.0725314	2.96839	0.00299365	0.0203678
	ZNF83	373.219	0.328888	0.110901	2.96561	0.00302086	0.020506
	CCL2	75.8377	0.416902	0.140585	2.96548	0.00302211	0.020506
	PA2G4	3493.69	-0.142743	0.0481313	-2.9657	0.00302	0.020506
	PCYT2	800.224	0.259374	0.087459	2.96566	0.00302035	0.020506
	VCL	5473.82	-0.11451	0.038613	-2.96557	0.00302122	0.020506
	NRARP	3400.12	0.144846	0.0488583	2.9646	0.00303073	0.0205534
	VWDE	311.152	0.346156	0.11677	2.96444	0.00303238	0.0205535
	C1orf123	691.863	-0.2641	0.0891021	-2.96402	0.00303653	0.0205595
	SLC2A1	6588.45	0.109235	0.0368525	2.96411	0.00303555	0.0205595
	SLC25A42	107.712	0.415672	0.140354	2.9616	0.00306043	0.0207101
	FAM219B	1009.13	0.227792	0.0769309	2.96099	0.0030665	0.0207401
	KMT2D	3392.67	-0.253799	0.0857647	-2.95925	0.00308387	0.0208463
	LIFR	269.518	0.355723	0.12022	2.95894	0.00308699	0.0208563
	SMIM11	307.592	0.34252	0.115821	2.95732	0.00310322	0.0209546
	PTCD3	1953.33	0.172211	0.0583112	2.9533	0.00314392	0.0212067
	A2ML1	298.579	0.352001	0.119187	2.95336	0.00314337	0.0212067
	RBBP6	2374.42	-0.1599	0.0541492	-2.95295	0.00314755	0.0212198
	FAM3A	1026.93	0.229581	0.0777663	2.95219	0.00315528	0.0212605
	CAV2	877.402	0.240832	0.081587	2.95184	0.00315886	0.0212733
	LAMTOR3	680.06	0.263637	0.0893278	2.95135	0.00316389	0.0212958
	NT5E	181.345	0.387639	0.131358	2.951	0.00316745	0.0213083
	PTRHD1	710.555	-0.2576	0.0873401	-2.94939	0.00318402	0.0214084
	HDGFRP2	1655.26	-0.186266	0.063194	-2.94753	0.00320329	0.021516
	DPAGT1	600.13	0.278497	0.0944907	2.94734	0.00320517	0.021516
	C4orf21	397.036	0.317822	0.107829	2.94747	0.0032039	0.021516
	DYRK3	581.305	0.284709	0.0966259	2.94651	0.0032138	0.0215625
	SELO	651.893	0.26687	0.0905814	2.94619	0.00321719	0.021572
	KEAP1	2289.93	-0.160467	0.0544688	-2.94604	0.00321866	0.021572
	PRR15L	956.826	0.235247	0.0798859	2.94479	0.00323176	0.0216253
	MCM3AP	2403.01	0.17943	0.0609266	2.94502	0.00322933	0.0216253
	OGFR	1372.36	-0.203162	0.0689868	-2.94494	0.00323017	0.0216253
	UQCC2	589.326	0.276243	0.0938175	2.94448	0.00323501	0.0216355
	COBLL1	307.063	-0.344921	0.1172	-2.94301	0.00325042	0.021727
	DBNL	2779.98	-0.162944	0.0553926	-2.94161	0.00326508	0.0218018
	SH2B1	1084.76	0.225721	0.0767324	2.94166	0.00326458	0.0218018
	POLR3G	245.937	0.362506	0.123242	2.94142	0.00326714	0.021804
	CCNY	2309.31	0.161435	0.054899	2.94059	0.00327589	0.0218508
	SKIV2L	1105.58	0.222184	0.0755745	2.93994	0.00328278	0.0218736
	MYCN	112.407	-0.41117	0.139851	-2.94005	0.00328161	0.0218736
	LYPD6B	41.5582	-0.385758	0.131288	-2.93827	0.00330051	0.0219801
	MYO1D	1608.71	-0.190457	0.064824	-2.93807	0.00330268	0.0219829
	UNC119B	1367.33	-0.202028	0.0687859	-2.93706	0.00331345	0.022043
	SLC7A8	105.556	0.412495	0.1406	2.93383	0.00334808	0.0222615
	ATAD1	1603.6	0.187767	0.064051	2.93152	0.0033731	0.022416
	KIAA1161	740.677	0.265685	0.0906569	2.93066	0.00338243	0.0224501
	DNAJB12	993.381	-0.224741	0.0766842	-2.93073	0.00338168	0.0224501
	PEAK1	1369.48	-0.203307	0.0693759	-2.93052	0.00338396	0.0224501
	C5orf46	168.053	-0.392559	0.133961	-2.93039	0.00338536	0.0224501
	CPNE2	667.658	-0.265299	0.0906532	-2.92652	0.00342772	0.022719
	COPS5	1847.56	-0.179053	0.0613095	-2.92048	0.00349493	0.0231523
	METTL17	547.269	0.283414	0.0970696	2.9197	0.00350369	0.0231981
	RIF1	3847.12	-0.132091	0.0452457	-2.91941	0.00350698	0.0232077
	TNFRSF18	41.4816	-0.385185	0.131964	-2.91886	0.00351313	0.0232362
	TJP3	1178.91	0.223658	0.0766839	2.91663	0.00353836	0.0233907
	ERO1L	2473.17	0.154311	0.0529347	2.91512	0.0035555	0.0234917
	EDF1	2350.25	-0.170513	0.0584977	-2.91487	0.00355833	0.023498
	SMYD3	548.48	0.281817	0.0967173	2.91382	0.00357037	0.0235652
	DARS	2079.48	-0.166594	0.0571884	-2.91308	0.00357886	0.0236088
	ZBTB44	639.195	-0.268023	0.0920304	-2.91233	0.00358739	0.0236527
	GLDC	1769.8	0.181188	0.0622308	2.91155	0.00359644	0.0236875
	ANK3	1812.61	0.176686	0.0606834	2.9116	0.00359584	0.0236875
	TMEM231	184.447	0.38606	0.132615	2.91114	0.00360111	0.0237059
	CDC42SE2	3512.42	0.137307	0.0471712	2.91083	0.00360473	0.0237173
	ARID1B	1722.05	-0.184713	0.0634714	-2.91017	0.00361234	0.0237385
	GTF2H3	1110.52	0.220446	0.075745	2.91037	0.00361007	0.0237385
	PIR	462.22	-0.296602	0.101923	-2.91006	0.00361362	0.0237385
	FAM193A	657.268	-0.262399	0.090185	-2.90957	0.00361929	0.0237634
	ACAD10	466.349	0.297717	0.102364	2.90842	0.00363263	0.0238385
	TCTEX1D2	311.259	0.337688	0.116141	2.90758	0.00364236	0.0238775
	USP6NL	1463.59	-0.19129	0.0657874	-2.9077	0.003641	0.0238775
	PODXL2	2076.92	-0.169404	0.058274	-2.90703	0.00364875	0.023904
	USP25	2976.74	-0.143256	0.0492813	-2.90691	0.0036502	0.023904
	DAB2IP	678.975	-0.259811	0.0894018	-2.90611	0.00365954	0.0239527
	UNC45A	2052.81	0.174404	0.0600311	2.90523	0.00366984	0.0240076
	TTPAL	1391.29	0.205008	0.0705736	2.90488	0.00367388	0.0240215
	GMCL1	1435.84	0.194588	0.066995	2.90452	0.00367816	0.024037
	ARL6IP4	1501.97	-0.188513	0.0649283	-2.9034	0.00369135	0.0241107
	SLC35F3	184.802	0.390726	0.1346	2.90286	0.00369771	0.0241397
	ARPC1B	3044.86	-0.146589	0.0505123	-2.90204	0.00370737	0.0241902
	B3GALT5	35.451	0.37357	0.128758	2.90133	0.00371578	0.0242325
	PTEN	2068.54	0.188912	0.0651493	2.89968	0.00373541	0.0243332
	RBBP9	464.104	0.296203	0.10216	2.89939	0.00373895	0.0243332
	FAU	6341.01	0.110043	0.0379476	2.89986	0.00373328	0.0243332
	NIPSNAP1	2440.85	0.155014	0.0534641	2.8994	0.00373875	0.0243332
	CRYAB	2726.95	-0.148703	0.0512988	-2.89876	0.0037464	0.024369
	C5orf45	392.632	0.317096	0.109436	2.89755	0.00376091	0.0244508
	TBC1D8B	568.042	0.275219	0.0950106	2.89672	0.00377085	0.0245028
	GBP3	368.657	-0.326363	0.112679	-2.8964	0.00377474	0.0245153
	SMC2	2617.18	-0.151229	0.0522162	-2.89622	0.00377692	0.0245168
	S100A10	6282.51	-0.108269	0.0373998	-2.8949	0.00379275	0.0246069
	LMNA	17926.8	0.0829918	0.0286829	2.89343	0.00381062	0.0247101
	SELT	1701.6	0.183272	0.0633444	2.89326	0.00381268	0.0247107
	RUNX3	1999.09	-0.176481	0.0610234	-2.89202	0.00382773	0.0247955
	AMD1	5756.96	0.11334	0.0392034	2.89107	0.00383927	0.0248574
	CCND1	15872.6	-0.0803472	0.0277984	-2.89035	0.0038481	0.0249018
	CFDP1	388.184	0.314583	0.108846	2.89016	0.00385048	0.0249044
	ATN1	5188.92	-0.114114	0.0394865	-2.88994	0.00385319	0.0249091
	GNAS	20100	-0.0812552	0.0281464	-2.88687	0.0038909	0.02514
	PCID2	699.982	0.253776	0.0879173	2.88653	0.00389519	0.0251548
	PRR16	688.371	-0.260753	0.0903402	-2.88635	0.00389741	0.0251562
	MFN2	3352.82	0.135158	0.0468303	2.88613	0.00390012	0.0251608
	IQCG	744.242	0.25255	0.0875311	2.88526	0.00391087	0.0252172
	SLC45A4	2641.28	0.15425	0.0534758	2.88449	0.00392054	0.0252666
	PARP4	1813.31	-0.174998	0.0606781	-2.88404	0.00392612	0.0252896
	TSC22D2	847.449	-0.23758	0.0824045	-2.88309	0.00393794	0.0253528
	RPL14	8714.62	-0.0950591	0.0329826	-2.8821	0.00395038	0.0254073
	UBTF	2834.31	-0.146329	0.0507741	-2.88195	0.00395219	0.0254073
	MRPL34	625.141	0.273501	0.094902	2.88193	0.00395247	0.0254073
	C2orf43	319.182	-0.345732	0.120046	-2.88001	0.00397669	0.0255499
	FKBP10	3905.97	0.142971	0.0496475	2.87972	0.00398028	0.02556
	HIBADH	1124.5	0.210528	0.073127	2.87894	0.00399019	0.0256006
	CXCL11	961.002	-0.229594	0.0797508	-2.8789	0.00399068	0.0256006
	PIN4	454.88	-0.306875	0.106605	-2.87861	0.00399433	0.025611
	MYB	2965.55	0.142298	0.0494537	2.87739	0.00400982	0.0256875
	FHOD1	305.097	0.335695	0.116668	2.87735	0.00401035	0.0256875
	PRRT2	76.0657	0.40465	0.140739	2.87519	0.00403788	0.0258492
	MUTYH	399.16	0.309868	0.107779	2.87504	0.00403971	0.0258492
	TMA16	840.235	-0.237262	0.0825659	-2.87361	0.00405805	0.0259373
	ABCF3	1720.9	0.179154	0.0623471	2.8735	0.00405957	0.0259373
	APOL2	403.595	-0.309384	0.107668	-2.87349	0.00405966	0.0259373
	NFATC1	50.3002	-0.390627	0.135979	-2.8727	0.00406985	0.0259739
	MACROD2	37.5864	0.366885	0.12772	2.87256	0.00407159	0.0259739
	GLRX5	931.974	0.226863	0.0789744	2.87262	0.00407089	0.0259739
	MAT2A	5255.94	-0.114458	0.0398526	-2.87204	0.00407831	0.0260036
	RALBP1	4787.66	-0.117088	0.0407861	-2.87079	0.0040945	0.0260936
	ADORA1	184.948	-0.374996	0.130806	-2.86681	0.00414627	0.0264102
	DFNB31	251.589	0.353931	0.123475	2.86642	0.00415139	0.0264294
	FBXW7	1568.36	0.184716	0.0644538	2.86586	0.00415882	0.0264633
	MRPL1	617.77	-0.265023	0.092505	-2.86496	0.0041706	0.0265248
	AKAP1	2913.71	-0.141504	0.0493942	-2.86478	0.00417295	0.0265264
	SSBP3	632.113	-0.270554	0.0944684	-2.86397	0.00418373	0.0265815
	TRIQK	846.124	0.234943	0.0820788	2.86241	0.00420432	0.0266988
	RPL3	32510.7	-0.0675961	0.0236371	-2.85975	0.00423978	0.0269104
	KCTD13	471.97	0.289692	0.101352	2.85829	0.00425937	0.0270211
	TDG	921.541	0.230164	0.0805357	2.85791	0.00426444	0.0270265
	ASPM	4789.96	-0.119654	0.0418678	-2.8579	0.00426452	0.0270265
	NFKBIE	119.214	0.397528	0.139109	2.85767	0.00426758	0.0270323
	WDR61	979.496	0.227293	0.0795562	2.85702	0.00427642	0.0270747
	NDUFS5	4023.88	0.130132	0.0455605	2.85624	0.00428692	0.0271275
	PLBD1	50.5268	-0.388639	0.136081	-2.85595	0.00429083	0.0271386
	EIF2AK4	1284.55	0.200372	0.0701655	2.85571	0.0042941	0.0271456
	PIGL	221.161	0.361935	0.126803	2.85432	0.00431296	0.0272511
	BTBD6	1446.08	-0.188067	0.0659238	-2.85279	0.00433376	0.0273688
	AP5B1	461.075	-0.308882	0.108401	-2.84944	0.00437964	0.0276447
	SFXN2	488.219	-0.286255	0.10047	-2.84915	0.00438366	0.0276562
	LIPA	1218.24	0.20133	0.0706679	2.84897	0.00438616	0.0276581
	ZNF862	401.691	0.314327	0.110339	2.84872	0.00438953	0.0276655
	BIRC5	1518.89	-0.18587	0.0652914	-2.84678	0.00441637	0.0278207
	SPCS1	1623.08	0.178965	0.0628824	2.84602	0.00442688	0.0278729
	CEP170	1270.29	0.200047	0.070301	2.84558	0.00443307	0.0278979
[truncated: 13,991 more rows]

## Sheet: FCIBC02->Combo_Vs_Vehicle
Treatment	id	baseMean	log2FoldChange	lfcSE	stat	pvalue	padj
1e-8M Paclitaxel	KRT5	61360.4	-1.02819	0.0285499	-36.0137	5.1012e-284	7.10495e-280
15uM INC424	NES	2384.63	-1.99345	0.0596262	-33.4325	4.61975e-245	2.1448e-241
	GABRP	21623.2	-0.975865	0.0291881	-33.4337	4.44349e-245	2.1448e-241
	MX1	1958.65	-2.21164	0.0715755	-30.8995	1.2148e-209	4.22994e-206
	PTPRF	43797.6	-0.731933	0.0245808	-29.7766	7.84942e-195	2.18653e-191
	EMP1	31387.5	-0.960384	0.032689	-29.3794	1.00778e-189	2.3394e-186
	KRT19	20848.4	-0.903345	0.0312299	-28.9256	5.68445e-184	1.13104e-180
	RDH10	14618.6	-0.88522	0.0306777	-28.8555	4.3214e-183	7.52357e-180
	ENC1	2725.26	-1.51879	0.0567428	-26.7662	8.00264e-158	1.23845e-154
	IGFBP3	5887.7	-1.08042	0.0419589	-25.7495	3.2642e-146	4.54637e-143
	CRABP2	4293.56	-1.31187	0.0510943	-25.6754	2.20155e-145	2.78756e-142
	SERPINA3	1586.18	-1.81172	0.0709862	-25.5222	1.11872e-143	1.29846e-140
	IFITM3	5308.4	-1.0797	0.042335	-25.5036	1.79895e-143	1.92737e-140
	ITPR2	5946.1	-1.09548	0.0441725	-24.8	8.96215e-136	8.91606e-133
	HMCN1	3209.62	-1.28805	0.0527764	-24.4058	1.4853e-131	1.37915e-128
	APCDD1	878.238	-2.29264	0.0946134	-24.2316	1.03301e-129	8.99234e-127
	KLK14	1968.03	-1.5323	0.0633849	-24.1746	4.11947e-129	3.37505e-126
	IFI6	656.187	-2.71749	0.113442	-23.9548	8.23377e-127	6.37111e-124
	MMP7	6650.26	-1.03574	0.0453506	-22.8385	1.90319e-115	1.39513e-112
	PTX3	1363.44	1.73359	0.076664	22.6128	3.24538e-113	2.26008e-110
	IRF9	627.962	-2.48921	0.110394	-22.5485	1.38931e-112	9.21446e-110
	ALPL	2796.48	-1.28524	0.0572752	-22.4398	1.61021e-111	1.01941e-108
	RPL3	28483	-0.581391	0.0261496	-22.2333	1.63666e-109	9.91107e-107
	FMO2	625.06	-2.43499	0.114007	-21.3583	3.26717e-101	1.89605e-98
	STAT1	2977.88	-1.17755	0.0552765	-21.3029	1.0669e-100	5.94392e-98
	KRT4	4705.89	-1.64129	0.07742	-21.1998	9.59043e-100	5.13752e-97
	HEBP2	15699.3	-0.66368	0.0315458	-21.0387	2.90472e-98	1.4984e-95
	CD44	14436.7	0.649088	0.0308813	21.0188	4.41373e-98	2.19552e-95
	NFKB2	1785.68	1.36408	0.0650852	20.9584	1.57374e-97	7.55828e-95
	PAM	3253.36	-1.07651	0.0514004	-20.9435	2.14902e-97	9.97717e-95
	SLC3A2	5414.35	0.869966	0.0415962	20.9145	3.94737e-97	1.77351e-94
	FASN	15931.1	-0.629042	0.0300955	-20.9016	5.18169e-97	2.25533e-94
	NOTCH3	44617.5	-0.574961	0.0278409	-20.6516	9.43573e-95	3.98245e-92
	DDX60	1029.02	-1.80982	0.0891119	-20.3095	1.05892e-91	4.33783e-89
	IFFO2	3805.3	-1.02795	0.0506422	-20.2984	1.32902e-91	5.28874e-89
	ATF3	1031.75	1.74814	0.0861994	20.2802	1.92382e-91	7.44305e-89
	NRP1	2708.57	-1.11649	0.0554747	-20.1262	4.35087e-90	1.63781e-87
	SLC7A5	12869	0.642496	0.0319645	20.1003	7.33833e-90	2.68969e-87
	MDK	1885.21	-1.34348	0.0671215	-20.0156	4.02439e-89	1.43722e-86
	PBX1	3729.66	-0.951251	0.0481522	-19.7551	7.24995e-87	2.52443e-84
	IFITM1	576.285	-2.17567	0.110628	-19.6666	4.16646e-86	1.41538e-83
	CGN	3065.99	-1.01812	0.0519834	-19.5854	2.05954e-85	6.82981e-83
	CELSR2	3891.5	-0.917396	0.047306	-19.3928	8.87805e-84	2.87566e-81
	ELF5	2574.99	-1.14896	0.0598698	-19.191	4.39965e-82	1.39269e-79
	PMP22	2317.33	-1.23299	0.0649192	-18.9927	1.96118e-80	6.07008e-78
	KLK6	3760.57	-0.974005	0.0514407	-18.9345	5.9231e-80	1.79341e-77
	ADAMTS16	1059.35	-1.54019	0.0817956	-18.8297	4.31086e-79	1.27748e-76
	SULF2	6778.47	-0.754219	0.0404947	-18.6251	2.01002e-77	5.83241e-75
	EPB41L2	4522.87	-0.83067	0.0449038	-18.4989	2.10847e-76	5.99322e-74
	PDE4B	1990.82	1.20712	0.065443	18.4453	5.68356e-76	1.58321e-73
	AMOT	2346.23	-1.15912	0.0633658	-18.2926	9.4782e-75	2.58848e-72
	AGRN	11472.7	-0.594182	0.0326679	-18.1886	6.35637e-74	1.70253e-71
	RPL12	22717.9	-0.563624	0.0311389	-18.1003	3.17022e-73	8.3311e-71
	ANXA1	12990.7	0.633495	0.0350345	18.082	4.41405e-73	1.1385e-70
	PARP9	668.418	-1.89319	0.104738	-18.0754	4.97792e-73	1.26059e-70
	IL8	220.034	3.19866	0.178537	17.916	8.84883e-72	2.20083e-69
	H1F0	12521.5	-0.560053	0.0314438	-17.8113	5.77961e-71	1.41225e-68
	SLC34A2	5313.23	-0.838412	0.0472234	-17.7542	1.60022e-70	3.84273e-68
	FADS2	13188.3	-0.613793	0.0346324	-17.7231	2.78182e-70	6.56698e-68
	CCL28	1385.61	-1.29119	0.0730373	-17.6785	6.14364e-70	1.42614e-67
	KRT16	20224.4	-0.537755	0.0305608	-17.5962	2.63426e-69	6.01475e-67
	SQSTM1	7985.99	0.622567	0.0355394	17.5177	1.05075e-68	2.36045e-66
	SLC44A2	9646.13	-0.591992	0.0340597	-17.381	1.14859e-67	2.53929e-65
	GUCY1A3	7226.79	-0.655284	0.0379726	-17.2568	9.95343e-67	2.16612e-64
	OAS3	999.199	-1.58385	0.0922629	-17.1667	4.71436e-66	1.01018e-63
	MCL1	14597.9	-0.534181	0.0314584	-16.9806	1.14353e-64	2.4132e-62
	PTPN14	6201.1	-0.722083	0.042859	-16.8479	1.08739e-63	2.26046e-61
	SDC1	5327.79	-0.697771	0.0414823	-16.8209	1.71422e-63	3.51112e-61
	CTGF	4097.39	-1.52131	0.0912224	-16.6769	1.92999e-62	3.89577e-60
	LTBP1	1735.94	-1.11265	0.0667242	-16.6753	1.98172e-62	3.94306e-60
	ARL4C	2631.29	-0.992726	0.059765	-16.6105	5.85144e-62	1.14787e-59
	KIT	18202.9	-0.590194	0.0355343	-16.6091	5.98696e-62	1.15814e-59
	S100P	1698.98	1.08325	0.0657194	16.483	4.85774e-61	9.26831e-59
	KRT8	17764.2	-0.501699	0.0304786	-16.4607	7.0298e-61	1.32312e-58
	FSTL1	2651.14	-0.894185	0.0543817	-16.4428	9.44995e-61	1.75492e-58
	COL18A1	6392.37	-0.696431	0.0424281	-16.4144	1.50878e-60	2.76504e-58
	TFRC	8401.35	0.629853	0.0384851	16.3662	3.33604e-60	6.03433e-58
	NUP210	3979.3	-0.760662	0.0465306	-16.3476	4.52619e-60	8.08216e-58
	FLNB	15824.1	-0.548125	0.0336404	-16.2937	1.09447e-59	1.92958e-57
	LGR4	7172.91	-0.638428	0.0393624	-16.2192	3.68743e-59	6.41981e-57
	ANKRD1	1601.64	-1.10453	0.0682172	-16.1914	5.80359e-59	9.97931e-57
	DTX3L	1148.94	-1.25336	0.0780636	-16.0557	5.21728e-58	8.86174e-56
	KCNN4	1751.28	1.16782	0.0727756	16.0468	6.01673e-58	1.00965e-55
	KIRREL	6810.29	-0.604103	0.0376934	-16.0268	8.30813e-58	1.37757e-55
	MT2A	1786.29	-1.04081	0.0654513	-15.902	6.13511e-57	1.00529e-54
	PLD1	816.879	1.46123	0.0920355	15.8768	9.16853e-57	1.48488e-54
	NTN4	3426.44	-0.795504	0.0504586	-15.7655	5.3776e-56	8.6091e-54
	RPS6	31171.4	-0.442927	0.0281015	-15.7617	5.71198e-56	9.04051e-54
	FBXO32	1777.32	1.01396	0.0648057	15.6462	3.527e-55	5.51956e-53
	NTRK2	5171.19	-0.662281	0.0425299	-15.5721	1.12632e-54	1.74304e-52
	EIF2AK2	3759.57	-0.744401	0.0480559	-15.4903	4.03305e-54	6.17279e-52
	FBLN1	1278.77	-1.15678	0.0750543	-15.4126	1.34698e-53	2.03921e-51
	EXT1	2261.81	0.902631	0.059459	15.1807	4.74385e-52	7.10456e-50
	SYNE2	5626.54	-0.656733	0.043324	-15.1586	6.64393e-52	9.84432e-50
	RPL7A	28024.2	-0.413267	0.0274503	-15.0551	3.19556e-51	4.68502e-49
	RPL13A	29403.5	-0.400282	0.0266792	-15.0035	6.96204e-51	1.01008e-48
	HDAC9	891.267	1.37537	0.0917892	14.984	9.34319e-51	1.34157e-48
	KLK5	12407.6	-0.474667	0.031792	-14.9304	2.09009e-50	2.97049e-48
	ASNS	2167.01	0.87207	0.0586286	14.8745	4.82677e-50	6.79063e-48
	RPL10A	8807.84	-0.521367	0.0352996	-14.7698	2.29532e-49	3.17016e-47
	MKI67	10691.2	-0.519408	0.0351673	-14.7697	2.29887e-49	3.17016e-47
	CYP1B1	13891.7	0.466018	0.0318546	14.6295	1.82084e-48	2.48634e-46
	PRPS2	2315.85	-0.858472	0.0587057	-14.6233	1.99459e-48	2.69715e-46
	ADAR	15549	-0.470378	0.0322231	-14.5976	2.91053e-48	3.89788e-46
	THBS1	24771.9	-0.483153	0.0333965	-14.4672	1.95325e-47	2.59094e-45
	SREBF1	5213.91	-0.606371	0.0419452	-14.4563	2.28883e-47	3.00743e-45
	SEMA3E	814.217	-1.36037	0.0941733	-14.4454	2.68129e-47	3.49018e-45
	PPP1R15A	2231.27	0.851686	0.0591494	14.3989	5.25717e-47	6.7798e-45
	MT-ND2	42208.1	0.416779	0.0289505	14.3963	5.46255e-47	6.98004e-45
	PRELP	3383.52	-0.696325	0.0484746	-14.3647	8.61406e-47	1.0907e-44
	CXCL1	587.368	1.52836	0.106733	14.3195	1.6524e-46	2.07339e-44
	ELF3	6397.64	-0.554142	0.0387134	-14.314	1.79017e-46	2.2262e-44
	TTYH1	1300.95	-1.05588	0.0740622	-14.2567	4.07534e-46	5.02313e-44
	ADAMTS15	419.348	-1.74409	0.122656	-14.2194	6.94849e-46	8.48935e-44
	ANXA2	29466.1	-0.388181	0.0278589	-13.9338	3.94612e-44	4.77926e-42
	NEBL	1708.89	-0.941499	0.0677712	-13.8923	7.05268e-44	8.46808e-42
	NUCKS1	22216.9	-0.377229	0.0273973	-13.7688	3.92577e-43	4.67334e-41
	FBLN2	2877.31	-0.726016	0.0528747	-13.7309	6.63224e-43	7.8283e-41
	RIMS3	3051.72	-0.691659	0.0505152	-13.6921	1.13214e-42	1.32508e-40
	IER3	3174.5	0.703327	0.0514326	13.6747	1.43734e-42	1.66828e-40
	SGK1	814.77	1.29011	0.0945649	13.6426	2.23497e-42	2.57261e-40
	NR4A1	509.991	1.54086	0.113414	13.5861	4.84074e-42	5.52638e-40
	SLC22A23	1272.9	-1.00987	0.0743728	-13.5784	5.37633e-42	6.08793e-40
	HSPB1	6341	-0.561348	0.0414479	-13.5434	8.66247e-42	9.72991e-40
	GLS	7934.38	-0.542449	0.04012	-13.5207	1.18107e-41	1.316e-39
	PPL	1769.81	-0.894279	0.0662348	-13.5017	1.52901e-41	1.69016e-39
	OAS1	156.973	-2.46839	0.183948	-13.419	4.68176e-41	5.13446e-39
	PTPRK	3687.76	-0.662189	0.0498663	-13.2793	3.05265e-40	3.32166e-38
	CAST	4856.33	-0.6148	0.0463599	-13.2615	3.87314e-40	4.18179e-38
	SEPN1	7185.44	-0.485778	0.0367725	-13.2104	7.6439e-40	8.18956e-38
	MUC1	563.509	-1.40265	0.106367	-13.1869	1.04377e-39	1.10974e-37
	KRT7	23942.2	-0.389456	0.029544	-13.1823	1.11012e-39	1.17134e-37
	SAT1	38681.9	0.342252	0.0259865	13.1704	1.29967e-39	1.36103e-37
	TP53I11	2846.19	-0.68079	0.0519816	-13.0967	3.4375e-39	3.57295e-37
	LTBP2	476.951	-1.49785	0.114656	-13.064	5.29083e-39	5.45857e-37
	TRIB3	1837.92	0.84283	0.0645411	13.0588	5.66045e-39	5.79697e-37
	MAP1B	1248.75	-1.05529	0.081048	-13.0206	9.34504e-39	9.50056e-37
	EEF1A1	139793	-0.352641	0.0271386	-12.9941	1.3221e-38	1.33436e-36
	CREB3L2	3737.63	-0.603896	0.0464986	-12.9874	1.44219e-38	1.4451e-36
	VGLL3	1872.81	-1.4702	0.113242	-12.9828	1.53105e-38	1.52318e-36
	RAB11FIP1	11762.7	-0.457024	0.0352172	-12.9773	1.64554e-38	1.62547e-36
	LYNX1	346.185	-1.73911	0.134549	-12.9255	3.23257e-38	3.17065e-36
	ELOVL6	5644.78	-0.588009	0.0456217	-12.8888	5.20483e-38	5.06943e-36
	BIRC3	242.352	2.00455	0.155677	12.8763	6.11797e-38	5.91744e-36
	PTP4A1	4324.11	0.56877	0.0442214	12.8619	7.37717e-38	7.08615e-36
	SHANK2	2656.19	-0.726521	0.0565011	-12.8585	7.70325e-38	7.34869e-36
	GATA6	405.343	1.62426	0.126932	12.7963	1.71946e-37	1.62915e-35
	INHBA	121.892	2.48313	0.194633	12.758	2.81271e-37	2.64699e-35
	ARHGAP29	13622.6	-0.448164	0.0351451	-12.7518	3.04532e-37	2.84666e-35
	IL6	103.521	2.56187	0.201688	12.7021	5.75358e-37	5.34239e-35
	HNRNPA1	14900.7	-0.388556	0.0307296	-12.6443	1.2022e-36	1.10889e-34
	PSAT1	6079.42	0.524843	0.0415283	12.6382	1.29955e-36	1.1908e-34
	TNS3	1673.23	-0.820945	0.0649856	-12.6327	1.39369e-36	1.26871e-34
	AHNAK2	3311.82	-0.676492	0.0535704	-12.6281	1.47826e-36	1.33696e-34
	GPC4	2582.4	-0.713901	0.0568107	-12.5663	3.23461e-36	2.90656e-34
	LPIN1	4750.58	-0.536876	0.0427564	-12.5566	3.65644e-36	3.26455e-34
	LEPREL1	1899.41	0.796485	0.0635436	12.5345	4.83617e-36	4.29033e-34
	APOL6	2115.2	-0.738541	0.0590056	-12.5165	6.06726e-36	5.34841e-34
	FTH1	20673.3	0.402739	0.0322704	12.4801	9.58072e-36	8.39247e-34
	GAS1	2274.98	-0.73428	0.0589039	-12.4657	1.14805e-35	9.99381e-34
	DUSP4	367.134	1.61219	0.129364	12.4624	1.19685e-35	1.03539e-33
	ARHGEF10L	2967.54	-0.67043	0.0539783	-12.4204	2.02649e-35	1.74228e-33
	RPS9	8535.87	-0.461578	0.037427	-12.3328	6.03287e-35	5.15496e-33
	RELB	748.161	1.22289	0.0993757	12.3058	8.43342e-35	7.16224e-33
	AIF1L	2956.81	-0.636155	0.0517074	-12.303	8.73123e-35	7.37021e-33
	NFIX	17900.7	-0.358753	0.0291827	-12.2934	9.83387e-35	8.25098e-33
	PTPRS	3668.34	-0.575437	0.0469192	-12.2644	1.40634e-34	1.1729e-32
	STON1	465.609	-1.46418	0.119443	-12.2585	1.51356e-34	1.25481e-32
	PSIP1	2592.97	-0.669119	0.0548012	-12.2099	2.75082e-34	2.26707e-32
	SPTBN2	4002.96	-0.561157	0.0459983	-12.1995	3.12723e-34	2.56212e-32
	DHCR24	8905.35	-0.484506	0.0398035	-12.1725	4.35799e-34	3.54959e-32
	SLC5A6	3929.91	0.580552	0.0478663	12.1286	7.4493e-34	6.0322e-32
	ITPR3	3803.72	-0.585267	0.0483389	-12.1076	9.63e-34	7.75299e-32
	PODXL	7596.31	-0.436703	0.0360866	-12.1015	1.03676e-33	8.29881e-32
	CTSB	12061.9	-0.439215	0.0365734	-12.0091	3.18134e-33	2.53199e-31
	TF	671.084	-1.19839	0.0998888	-11.9973	3.67156e-33	2.90554e-31
	PRKDC	35376.8	-0.321025	0.0267776	-11.9886	4.07906e-33	3.20979e-31
	KIAA1244	5899.33	-0.492521	0.0411087	-11.9809	4.47208e-33	3.49928e-31
	EEF1G	31737.1	-0.321077	0.0268205	-11.9713	5.02253e-33	3.90803e-31
	ACSL3	4149.14	-0.563009	0.0470802	-11.9585	5.86139e-33	4.53542e-31
	OAS2	90.2397	-2.44271	0.204365	-11.9527	6.28664e-33	4.83758e-31
	EMP2	2284.99	-0.701057	0.0586673	-11.9497	6.51505e-33	4.9858e-31
	FBL	5229.29	-0.490523	0.0410959	-11.9361	7.67793e-33	5.84362e-31
	GPNMB	5124.95	-0.510081	0.0428219	-11.9117	1.02848e-32	7.78517e-31
	DSG2	4790.57	-0.547931	0.0460224	-11.9057	1.1048e-32	8.31762e-31
	PIEZO1	4345.75	-0.531717	0.0446638	-11.9049	1.11651e-32	8.3606e-31
	HNRNPD	6068.81	-0.47191	0.0396905	-11.8898	1.33805e-32	9.96597e-31
	SCRN1	3325.88	-0.581444	0.0489795	-11.8712	1.67103e-32	1.23799e-30
	ARHGEF2	3655.82	0.557984	0.0471317	11.8388	2.4589e-32	1.81204e-30
	IL32	359.036	1.52296	0.129484	11.7618	6.14421e-32	4.50403e-30
	ULK2	820.151	-1.06145	0.0902621	-11.7596	6.3043e-32	4.59719e-30
	HSPH1	9178.96	0.41099	0.0351201	11.7024	1.23862e-31	8.98514e-30
	FAT1	9313.52	-0.435861	0.0373515	-11.6692	1.83208e-31	1.32214e-29
	TPM1	10900.4	-0.392463	0.03377	-11.6217	3.19885e-31	2.29657e-29
	RPL4	26671.9	-0.311929	0.0268434	-11.6203	3.24853e-31	2.32028e-29
	IFRD1	1717.75	0.751688	0.0647283	11.613	3.54077e-31	2.51612e-29
	MAP2K3	3431.77	0.568366	0.0491455	11.565	6.20088e-31	4.38406e-29
	SASH1	1496.17	-0.795167	0.0688067	-11.5565	6.84125e-31	4.81237e-29
	KDR	816.31	1.05226	0.0912671	11.5295	9.37304e-31	6.56018e-29
	TMEM63A	10197.6	-0.383177	0.0332987	-11.5073	1.2128e-30	8.44595e-29
	HNRNPU	17606.1	-0.351248	0.0306794	-11.449	2.37831e-30	1.64801e-28
	FRMD3	1405.27	-0.810814	0.0708612	-11.4423	2.5706e-30	1.77244e-28
	PLXNB2	8193.76	-0.406353	0.0358221	-11.3436	7.97549e-30	5.47205e-28
	SLC5A3	1558.92	-0.858645	0.0758633	-11.3183	1.06495e-29	7.2709e-28
	PTGFRN	3928.27	0.55872	0.0493978	11.3106	1.16246e-29	7.89791e-28
	FAM107B	1108.43	0.887804	0.0784982	11.3099	1.1727e-29	7.92881e-28
	RASD2	636.167	-1.13138	0.10045	-11.2631	1.99579e-29	1.34287e-27
	ENO1	42432.9	-0.284036	0.0252202	-11.2622	2.0158e-29	1.34981e-27
	LAMA4	1562.25	-0.78582	0.0698697	-11.2469	2.3976e-29	1.59779e-27
	COL4A2	2725.9	-0.595785	0.053053	-11.23	2.9051e-29	1.92677e-27
	RPL13	12937	-0.372139	0.0331816	-11.2152	3.43353e-29	2.26645e-27
	CYP1A1	74.1132	2.33768	0.20874	11.199	4.12371e-29	2.7092e-27
	LDLRAD4	1676.02	-0.748436	0.0668732	-11.1919	4.4691e-29	2.92233e-27
	NAV2	1941.3	-0.68095	0.0609238	-11.1771	5.27983e-29	3.43633e-27
	TCEA3	583.737	-1.20179	0.107555	-11.1737	5.48364e-29	3.55238e-27
	RPS3	31829.2	-0.330679	0.0296247	-11.1623	6.23674e-29	4.02154e-27
	MACF1	12713.6	-0.384597	0.034548	-11.1323	8.73855e-29	5.60878e-27
	LRRN2	548.965	-1.18438	0.106398	-11.1316	8.80633e-29	5.62636e-27
	NOTCH2	47524.7	-0.302896	0.0272155	-11.1295	9.01153e-29	5.73117e-27
	KLK11	2539.86	-0.62152	0.0558578	-11.1268	9.28942e-29	5.88105e-27
	HOXC12	1843.25	-0.711461	0.0639448	-11.1262	9.35538e-29	5.89601e-27
	EPS8	2179.24	0.657945	0.0594027	11.076	1.64028e-28	1.02909e-26
	PTMA	25469.9	-0.663885	0.0599437	-11.0751	1.65615e-28	1.03439e-26
	IGF2BP3	2895.53	-0.580762	0.0525528	-11.051	2.16756e-28	1.34776e-26
	PHLDA1	608.392	1.13423	0.102783	11.0351	2.58641e-28	1.60105e-26
	CD97	4768.26	0.473267	0.0429918	11.0083	3.48455e-28	2.14747e-26
	ARID1A	4475.55	-0.484674	0.0441362	-10.9813	4.69949e-28	2.88346e-26
	MAFF	732.354	1.0409	0.0948921	10.9693	5.36972e-28	3.28024e-26
	EIF4B	5791.78	-0.437507	0.0399101	-10.9623	5.80037e-28	3.52784e-26
	IDH2	3104.34	-0.557387	0.0510034	-10.9284	8.42886e-28	5.10422e-26
	RGS5	8034.39	-0.889854	0.0815509	-10.9116	1.01408e-27	6.11435e-26
	PPP1CB	10191.7	-0.37987	0.03493	-10.8752	1.51354e-27	9.08647e-26
	VLDLR	2006.2	-0.670044	0.0616502	-10.8685	1.62901e-27	9.73768e-26
	CALM2	22713.2	-0.303706	0.0280078	-10.8436	2.13822e-27	1.2727e-25
	ISG15	1060.14	-0.876671	0.0809897	-10.8245	2.636e-27	1.56231e-25
	WNK2	2468.45	-0.6044	0.0561074	-10.7722	4.65771e-27	2.74884e-25
	TNIP1	2664.37	0.627638	0.058365	10.7537	5.6948e-27	3.34671e-25
	PDGFB	498.798	-1.19349	0.111276	-10.7255	7.72855e-27	4.52283e-25
	SBSN	680.462	1.04873	0.0980551	10.6953	1.07063e-26	6.23921e-25
	HSPA5	10313.9	0.388037	0.0363086	10.6872	1.16834e-26	6.78028e-25
	DKK1	290.264	1.49617	0.14002	10.6854	1.19184e-26	6.88794e-25
	AMOTL2	3944.88	-0.488528	0.0461711	-10.5808	3.65724e-26	2.10488e-24
	PARP14	1031.26	-0.944445	0.0892919	-10.5771	3.80731e-26	2.18223e-24
	SPIN4	1415.34	-0.755387	0.0714725	-10.5689	4.15285e-26	2.37053e-24
	RPS11	25928.5	-0.294085	0.0278657	-10.5537	4.88594e-26	2.7776e-24
	NYNRIN	290.824	-1.48602	0.140855	-10.55	5.08113e-26	2.87683e-24
	GYLTL1B	1128.74	-0.822065	0.078063	-10.5308	6.23097e-26	3.51356e-24
	YARS	3413.83	0.511451	0.0485754	10.529	6.34927e-26	3.56583e-24
	HIST1H2AC	436.259	1.25735	0.119572	10.5154	7.33965e-26	4.10549e-24
	TFPI2	1024.7	-0.938808	0.0894689	-10.4931	9.29085e-26	5.17612e-24
	PFN2	3502.84	-0.500618	0.0477518	-10.4838	1.02593e-25	5.6703e-24
	SAMD9	297.831	-1.44616	0.137939	-10.4841	1.02266e-25	5.6703e-24
	PLXND1	512.78	-1.15724	0.110456	-10.477	1.10223e-25	6.06791e-24
	RRM2	5931.74	-0.410361	0.0391742	-10.4753	1.12198e-25	6.15235e-24
	CCND1	15089.6	-0.318217	0.0304149	-10.4625	1.28361e-25	7.01105e-24
	NR4A2	427.637	1.27111	0.121627	10.4509	1.4512e-25	7.89545e-24
	ZNF469	2267.48	-0.644585	0.0618127	-10.428	1.84687e-25	1.0009e-23
	TNFAIP3	436.013	1.37105	0.131605	10.4179	2.05476e-25	1.10925e-23
	TGFBI	405.809	-1.25801	0.120866	-10.4083	2.27297e-25	1.22231e-23
	DDIT3	354.493	1.35691	0.130618	10.3884	2.79994e-25	1.49991e-23
	HMGB1	9832.78	-0.346651	0.0333961	-10.38	3.05809e-25	1.63192e-23
	PPP2R3A	1112.8	-0.808158	0.077882	-10.3767	3.16543e-25	1.68275e-23
	MFI2	1347.37	-0.749945	0.0723095	-10.3713	3.34873e-25	1.77343e-23
	LPGAT1	2220.45	-0.602171	0.0580791	-10.3681	3.46245e-25	1.8267e-23
	SH3KBP1	1830.05	-0.677406	0.0654343	-10.3524	4.07916e-25	2.14394e-23
	RIPK4	3729.35	-0.4828	0.0466452	-10.3505	4.16457e-25	2.1806e-23
	EEF2	68787.9	-0.260546	0.0252486	-10.3192	5.77008e-25	3.00995e-23
	MICALL1	6876.88	-0.389229	0.0377302	-10.3161	5.95856e-25	3.09667e-23
	PABPC1	77512.4	-0.257686	0.0250015	-10.3069	6.56144e-25	3.39732e-23
	BAIAP2L2	1164.09	0.850469	0.0825531	10.3021	6.89496e-25	3.55678e-23
	MAGED1	11102	-0.359039	0.0348558	-10.3007	6.99518e-25	3.59516e-23
	NDRG2	629.503	-1.07023	0.104081	-10.2827	8.43439e-25	4.30308e-23
	HLA-A	1458.65	0.738146	0.0717838	10.2829	8.41513e-25	4.30308e-23
	SARS	4255.44	0.479851	0.04669	10.2774	8.9124e-25	4.53036e-23
	TRIM22	82.4184	-2.10001	0.20454	-10.267	9.9258e-25	5.02714e-23
	RPL10	15151.4	-0.322982	0.0315347	-10.2421	1.28374e-24	6.47824e-23
	PLSCR1	1947	-0.640809	0.0625745	-10.2407	1.30248e-24	6.54909e-23
	PLEKHG3	2229.34	-0.602153	0.0590425	-10.1986	2.01051e-24	1.00728e-22
	KCNC3	564.713	-1.12624	0.110559	-10.1868	2.27112e-24	1.13377e-22
	GADD45A	1082.16	0.806293	0.079721	10.1139	4.79209e-24	2.38372e-22
	ANKH	2613.19	-0.603227	0.0596753	-10.1085	5.06585e-24	2.51093e-22
	HIVEP3	1074.79	-0.800203	0.0792596	-10.096	5.75586e-24	2.84282e-22
	SHISA2	467.196	1.169	0.116229	10.0577	8.49523e-24	4.18098e-22
	LMNB1	5324.08	-0.42245	0.0420445	-10.0477	9.40621e-24	4.61302e-22
	MFGE8	5441.97	-0.434828	0.0433425	-10.0324	1.09835e-23	5.36763e-22
	SEMA6A	415.806	-1.19222	0.119117	-10.0088	1.39498e-23	6.79345e-22
	RPL32	13008.8	-0.311397	0.0311259	-10.0044	1.45716e-23	7.07153e-22
	PI15	186.416	-1.6646	0.166512	-9.9969	1.57236e-23	7.60412e-22
	CHAC1	220.495	1.56072	0.156142	9.99554	1.5942e-23	7.65654e-22
	MT-ND5	56172.3	-0.253579	0.025369	-9.9956	1.59313e-23	7.65654e-22
	HSPG2	6272.97	-0.451179	0.0453893	-9.9402	2.7826e-23	1.33183e-21
	SH3BP2	2171.53	-0.587872	0.0591618	-9.93668	2.88279e-23	1.37505e-21
	FBLN7	380.005	-1.22827	0.123664	-9.93231	3.01205e-23	1.43181e-21
	SAA1	1582.59	0.670733	0.0675448	9.93019	3.07674e-23	1.45758e-21
	ASPH	4945.31	-0.42994	0.0433677	-9.91383	3.62488e-23	1.71143e-21
	PARP10	2076.12	-0.589664	0.0596261	-9.88936	4.62962e-23	2.17842e-21
	NCOR2	3633.58	-0.463168	0.04689	-9.87775	5.19863e-23	2.43793e-21
	HSPA2	11235.7	-0.768382	0.0778552	-9.86937	5.6516e-23	2.64146e-21
	HNRNPA2B1	28691.1	-0.308177	0.0312948	-9.84756	7.023e-23	3.27145e-21
	NR4A3	108.975	1.90278	0.193862	9.81513	9.69106e-23	4.49923e-21
	ZNF697	3208.94	0.490567	0.049996	9.81213	9.9834e-23	4.61956e-21
	RBM3	4169.34	-0.455329	0.0464358	-9.80556	1.06558e-22	4.91438e-21
	LZTFL1	860.682	-0.863693	0.0880991	-9.80365	1.08591e-22	4.99159e-21
	HMGB3	4863.62	-0.410627	0.0419227	-9.79484	1.18482e-22	5.42834e-21
	SLC25A1	1708	-0.670231	0.0685118	-9.78272	1.33578e-22	6.09991e-21
	DUSP10	297.059	1.35784	0.138957	9.77169	1.48944e-22	6.77939e-21
	CD55	1414.65	0.682895	0.0702217	9.72484	2.36286e-22	1.07199e-20
	VANGL2	3006.54	-0.50914	0.0524107	-9.71444	2.61683e-22	1.18335e-20
	TM4SF1	19199.9	-0.284541	0.0293059	-9.70934	2.75102e-22	1.24001e-20
	MAP7	3590.94	0.462788	0.0476811	9.70591	2.84533e-22	1.27838e-20
	SOD2	3113.97	0.484725	0.0499785	9.69867	3.05463e-22	1.368e-20
	S100A2	4080.52	-0.443424	0.0458219	-9.67712	3.77184e-22	1.68379e-20
	RPLP0	28898.5	-0.25843	0.0267124	-9.67452	3.86886e-22	1.72158e-20
	DAPK1	5042.33	-0.420246	0.0434695	-9.66761	4.13927e-22	1.83605e-20
	LYN	3804.59	-0.463959	0.0482271	-9.6203	6.564e-22	2.90233e-20
	AVPI1	397.583	1.16868	0.121896	9.58748	9.02644e-22	3.97849e-20
	CHAF1B	1359.08	-0.708181	0.0739187	-9.58055	9.65322e-22	4.24133e-20
	RSPO1	205.55	-1.56715	0.163689	-9.57396	1.02885e-21	4.50625e-20
	HELZ2	1515.1	-0.672174	0.0703419	-9.55581	1.22617e-21	5.35365e-20
	LRP1	853.236	-0.894894	0.0936858	-9.55208	1.27121e-21	5.53294e-20
	HNRNPA3	5437.74	-0.414843	0.0434615	-9.54508	1.36006e-21	5.9012e-20
	SLC25A5	10348.4	-0.316509	0.0331893	-9.53648	1.47767e-21	6.3916e-20
	TOP2A	8677.64	-0.329338	0.034541	-9.53471	1.50305e-21	6.48126e-20
	SESN2	300.962	1.33538	0.140111	9.53089	1.55933e-21	6.7032e-20
	SLFN11	1118.89	-0.735078	0.0771828	-9.52385	1.66874e-21	7.15146e-20
	TNFSF10	435.265	-1.10866	0.116471	-9.51881	1.75167e-21	7.48382e-20
	PLK2	1872.26	-0.615885	0.064757	-9.51071	1.89375e-21	8.06608e-20
	MAP3K6	978.47	-0.778216	0.0818522	-9.50759	1.95139e-21	8.28626e-20
	SLC7A11	543.274	1.01092	0.106601	9.48319	2.46635e-21	1.04411e-19
	CTSH	2051.87	-0.571666	0.0603326	-9.47524	2.66151e-21	1.12332e-19
	TRAM1	8462.61	-0.36172	0.0382697	-9.45188	3.32799e-21	1.40037e-19
	TMPO	4204.13	-0.435601	0.0461174	-9.44548	3.53785e-21	1.48419e-19
	PTBP1	13361.5	-0.294161	0.0311803	-9.4342	3.94005e-21	1.64796e-19
	USP25	2729.08	-0.508699	0.054024	-9.41618	4.67815e-21	1.95082e-19
	RPS8	17546.5	-0.287523	0.0305801	-9.40231	5.33799e-21	2.21933e-19
	MLLT6	6265.47	-0.364684	0.038856	-9.38552	6.26063e-21	2.59518e-19
	IGSF9	2284.1	-0.554278	0.0590744	-9.38271	6.42968e-21	2.65734e-19
	TPT1	12416.8	-0.339213	0.0361659	-9.37936	6.63739e-21	2.73508e-19
	RPL5	18168.5	-0.296723	0.0316448	-9.37668	6.8084e-21	2.79727e-19
	RPS18	21842.4	-0.290193	0.0309701	-9.37012	7.24483e-21	2.96782e-19
	IFIT1	307.66	-1.33026	0.142235	-9.35253	8.55719e-21	3.49515e-19
	DSC2	3376.01	-0.459595	0.0494025	-9.30308	1.36431e-20	5.55618e-19
	RPL19	19397.9	-0.287031	0.0310874	-9.23303	2.63093e-20	1.06833e-18
	PDLIM1	1571.63	-0.621004	0.0672781	-9.23041	2.69608e-20	1.0916e-18
	SMOC1	539.901	1.00201	0.108561	9.22992	2.70824e-20	1.09334e-18
	THEM6	4149.77	-0.434514	0.047124	-9.22064	2.95332e-20	1.18884e-18
	RBMX	6668.44	-0.345561	0.0376165	-9.18641	4.06179e-20	1.63033e-18
	CD14	773.475	-0.83229	0.0908749	-9.15864	5.25539e-20	2.10336e-18
	HMGCS1	3059.85	-0.473645	0.0517378	-9.15472	5.44996e-20	2.17499e-18
	RNF213	2662.82	-0.570428	0.0623286	-9.15195	5.5916e-20	2.22514e-18
	BST2	2176	-0.543284	0.0593827	-9.14886	5.75389e-20	2.28319e-18
	GPR124	548.8	-0.995137	0.108979	-9.13147	6.75737e-20	2.67377e-18
	C6orf48	1690.98	0.591103	0.0649349	9.103	8.78683e-20	3.46694e-18
	FAT2	1576.69	-0.666016	0.073205	-9.09796	9.20468e-20	3.62155e-18
	PLCE1	1078.3	-0.717106	0.0788862	-9.09039	9.86859e-20	3.87182e-18
	VTCN1	1689.67	-0.607813	0.066944	-9.07943	1.09147e-19	4.27024e-18
	HES2	652.003	-0.903813	0.0995708	-9.07709	1.11513e-19	4.35058e-18
	AUTS2	1502.62	-0.61421	0.0677293	-9.06861	1.2055e-19	4.68998e-18
	EGR1	472.668	-1.01934	0.112641	-9.04942	1.43727e-19	5.57613e-18
	RGCC	279.73	-1.25936	0.139172	-9.04893	1.44374e-19	5.58566e-18
	LMNB2	9862.52	-0.301257	0.0333184	-9.04176	1.54165e-19	5.94796e-18
	H6PD	1781.78	-0.56853	0.0629269	-9.03477	1.64353e-19	6.32352e-18
	WBSCR22	2134.37	0.541769	0.0600694	9.01906	1.89715e-19	7.27919e-18
	KRT6B	7009.61	0.3564	0.0396414	8.99059	2.45905e-19	9.40926e-18
	ERBB3	2919.75	-0.491986	0.0547467	-8.98658	2.55038e-19	9.73197e-18
	HERC6	722.011	-0.888627	0.098905	-8.98464	2.59574e-19	9.87799e-18
	SREBF2	5722.79	-0.377266	0.042009	-8.98061	2.69282e-19	1.02195e-17
	ATPIF1	1599.56	0.614928	0.0685006	8.97699	2.78287e-19	1.05326e-17
	TGFA	2893.15	-0.463583	0.0516936	-8.9679	3.02222e-19	1.14075e-17
	ALDH1A3	3936.06	0.417012	0.0465126	8.96558	3.08653e-19	1.16187e-17
	IPO9	6714	-0.345741	0.0385999	-8.95704	3.33501e-19	1.25202e-17
	POMP	5644.3	0.363762	0.0406275	8.9536	3.44082e-19	1.28827e-17
	PLEC	18096.2	-0.29434	0.0328858	-8.95038	3.54265e-19	1.32284e-17
	ATP2B4	5229.09	-0.398653	0.0445752	-8.94337	3.77475e-19	1.40574e-17
	RAB31	2012.69	-0.533815	0.0597314	-8.93694	4.00112e-19	1.48607e-17
	EPPK1	1596.01	-0.627193	0.0702058	-8.93363	4.12238e-19	1.52704e-17
	KIAA0247	2370.69	-0.513606	0.0575463	-8.9251	4.4531e-19	1.64517e-17
	FBN1	1485.64	-0.616007	0.0690369	-8.92287	4.54376e-19	1.67422e-17
	UBAP2L	10783.9	-0.297922	0.0334216	-8.91406	4.91971e-19	1.80796e-17
	CDCA7L	1938.33	-0.546292	0.0613812	-8.89999	5.58503e-19	2.04706e-17
	NSD1	2781.38	-0.496307	0.0558028	-8.89395	5.89755e-19	2.15593e-17
	LRPPRC	8368.56	-0.3162	0.0356622	-8.86654	7.54561e-19	2.75119e-17
	FAM20C	2350.91	-0.495937	0.0559936	-8.85702	8.21813e-19	2.98857e-17
	SFN	3041	-0.453497	0.0513637	-8.82913	1.05489e-18	3.82618e-17
	RNF145	1847.76	0.554834	0.0628851	8.82297	1.11459e-18	4.0322e-17
	LOXL2	355.128	-1.11399	0.126437	-8.81064	1.24432e-18	4.48987e-17
	MYADM	2589.42	-0.517154	0.0588138	-8.79309	1.45508e-18	5.23677e-17
	MBNL1	5794.06	-0.358094	0.0407459	-8.78848	1.516e-18	5.44199e-17
	DSC3	6759.92	-0.36652	0.0418923	-8.74909	2.15074e-18	7.70066e-17
	RPS3A	6344.13	-0.389571	0.0445432	-8.74592	2.21212e-18	7.90009e-17
	DHX9	11414.4	-0.285321	0.03268	-8.73074	2.53005e-18	9.01242e-17
	CDH3	4404.26	-0.392324	0.044967	-8.72471	2.66864e-18	9.48186e-17
	JAG2	2707.5	-0.486473	0.0557826	-8.72087	2.76066e-18	9.78383e-17
	CHD4	9025.46	-0.316441	0.0363089	-8.71524	2.90148e-18	1.02568e-16
	CXCL5	241.826	1.28864	0.147869	8.71478	2.91312e-18	1.02719e-16
	FARP1	2658.81	-0.466612	0.0536115	-8.70357	3.21601e-18	1.13113e-16
	CERS6	2765.39	-0.474842	0.054591	-8.69817	3.37272e-18	1.18326e-16
	TXNIP	4810	-0.378322	0.0435101	-8.69503	3.46743e-18	1.21343e-16
	MCM4	12054.2	-0.272196	0.031325	-8.68941	3.64339e-18	1.27181e-16
	PDCD4	2832.61	-0.467669	0.0538293	-8.688	3.68864e-18	1.28118e-16
	PLCG2	1789.26	-0.602367	0.0693318	-8.68819	3.68262e-18	1.28118e-16
	EFR3B	95.2357	1.71111	0.197184	8.67773	4.03747e-18	1.39885e-16
	SIPA1L2	469.093	1.00245	0.115575	8.67358	4.18749e-18	1.44723e-16
	CNN3	4975.57	-0.38994	0.0450197	-8.66154	4.6542e-18	1.60455e-16
	SFT2D2	7303.57	-0.316341	0.0365872	-8.64621	5.32358e-18	1.83078e-16
	COL15A1	118.649	1.65538	0.191573	8.64096	5.57412e-18	1.91222e-16
	ZFAND2A	418.52	1.08754	0.126049	8.62793	6.247e-18	2.13779e-16
	MYCL	1220.08	-0.64896	0.075303	-8.61799	6.81386e-18	2.32606e-16
	NEK6	969.124	-0.718235	0.0833678	-8.61526	6.97831e-18	2.37638e-16
	HMGN2	3214.96	-0.440809	0.0512471	-8.60163	7.85891e-18	2.66973e-16
	PPAP2C	2141.51	-0.501716	0.0583565	-8.59743	8.15207e-18	2.76258e-16
	PLXNA1	4762.44	-0.36565	0.0425947	-8.58439	9.13204e-18	3.08716e-16
	MCM5	2486.28	-0.474965	0.0553574	-8.57997	9.48948e-18	3.20023e-16
	TNFRSF10D	531.045	0.921568	0.107444	8.5772	9.7213e-18	3.27049e-16
	SP1	2621.6	-0.458812	0.0535593	-8.56642	1.06749e-17	3.58264e-16
	MSH2	4490.16	-0.395201	0.0461704	-8.55961	1.13247e-17	3.79161e-16
	LOXL1	497.754	-0.956704	0.111796	-8.55758	1.15263e-17	3.84984e-16
	FDPS	5310.93	-0.363303	0.0425117	-8.54595	1.27484e-17	4.24784e-16
	UBE2C	4484.39	-0.405926	0.0475462	-8.53751	1.37139e-17	4.55865e-16
	ADAMTSL3	129.027	-1.55139	0.181813	-8.5329	1.42728e-17	4.73312e-16
	AARD	10438.2	-0.541669	0.0635754	-8.52011	1.59398e-17	5.27339e-16
	FGF2	768.687	-0.778666	0.0914085	-8.51853	1.6159e-17	5.33325e-16
	DDX17	7361.21	-0.309254	0.0363118	-8.51663	1.64257e-17	5.40843e-16
	UNG	2302.44	-0.48489	0.0570077	-8.50569	1.80512e-17	5.92964e-16
	PTK7	2570.72	-0.458735	0.0539711	-8.49964	1.90174e-17	6.23233e-16
	ABCA2	2120.72	-0.50728	0.0597136	-8.4952	1.97586e-17	6.46005e-16
	RUNX2	240.936	-1.24691	0.146943	-8.48568	2.14455e-17	6.99514e-16
	MAP1LC3B	1493.8	0.583283	0.0688833	8.46769	2.50311e-17	8.14563e-16
	NUP35	2456.88	0.476127	0.0562718	8.4612	2.64634e-17	8.59167e-16
	HEY2	2678.12	-0.472943	0.055903	-8.46008	2.672e-17	8.65479e-16
	C22orf29	1123.28	-0.650556	0.0770974	-8.43811	3.22506e-17	1.0422e-15
	PAQR4	1553.1	-0.579713	0.0687138	-8.43664	3.26603e-17	1.05299e-15
	TUBB	34219.8	-0.216964	0.0257314	-8.43186	3.40227e-17	1.09438e-15
	GNB2L1	27346.9	-0.233678	0.0277176	-8.43067	3.43688e-17	1.10297e-15
	RAD21	21896.3	-0.242588	0.0288402	-8.41144	4.0501e-17	1.29678e-15
	RUNX3	2669.12	0.51924	0.0617386	8.4103	4.08952e-17	1.3064e-15
	TOMM20	9152.96	-0.308556	0.0367407	-8.39822	4.53311e-17	1.44479e-15
	PET112	939.288	-0.696426	0.0831151	-8.37906	5.33518e-17	1.69654e-15
	ERVMER34-1	828.876	-0.758068	0.0905955	-8.36761	5.87965e-17	1.86118e-15
	RPL7	24522	-0.238364	0.0284858	-8.36781	5.86985e-17	1.86118e-15
	KLK7	1818.86	-0.564781	0.0675553	-8.36027	6.25733e-17	1.97624e-15
	KLF4	252.893	1.22079	0.146061	8.35804	6.37675e-17	2.0094e-15
	H1FX	3167.73	-0.492494	0.058963	-8.35259	6.67808e-17	2.0996e-15
	ASAP3	1538.52	-0.577106	0.0691438	-8.34645	7.03451e-17	2.20668e-15
	DNM1	1111.02	-0.675663	0.0810098	-8.34051	7.397e-17	2.31518e-15
	STEAP3	1362.37	-0.592523	0.0710928	-8.3345	7.78267e-17	2.43043e-15
	ISYNA1	2138.95	-0.493917	0.0593136	-8.32721	8.27708e-17	2.57904e-15
	DDX58	1749.06	-0.573197	0.068885	-8.32108	8.71673e-17	2.70997e-15
	BOC	140.7	-1.49223	0.179512	-8.31271	9.35442e-17	2.90174e-15
	FAM129A	1319.17	0.605205	0.072824	8.31051	9.52881e-17	2.94927e-15
	ADCY3	2023.53	-0.494277	0.0595324	-8.30265	1.01811e-16	3.14416e-15
	SFPQ	9364.57	-0.27879	0.0336082	-8.29532	1.08296e-16	3.33704e-15
	PM20D2	1718.2	-0.541171	0.0652507	-8.29373	1.09753e-16	3.37449e-15
	FUS	9289.07	-0.286569	0.0345702	-8.28948	1.13746e-16	3.48956e-15
	ITGA4	529.536	-0.893254	0.107791	-8.28689	1.16246e-16	3.55839e-15
	HADHB	5008.52	-0.359971	0.0434587	-8.28305	1.20057e-16	3.667e-15
	SERBP1	9482.08	-0.28866	0.0348974	-8.27168	1.32082e-16	4.02548e-15
	ATP9A	3271.98	-0.416039	0.0503035	-8.27057	1.33317e-16	4.05423e-15
	TUBA1B	18633.9	-0.246774	0.0298414	-8.26952	1.34499e-16	4.08126e-15
	MLLT11	567.187	0.873696	0.105713	8.26481	1.39916e-16	4.23641e-15
	CX3CL1	482.536	-0.928909	0.112481	-8.25836	1.47693e-16	4.46219e-15
	EIF3L	11684	-0.279679	0.0338957	-8.25117	1.56853e-16	4.72868e-15
	TOP2B	6164.25	-0.321314	0.0389478	-8.24987	1.58571e-16	4.77015e-15
	SAMD1	1450.86	-0.566383	0.0686671	-8.24825	1.60733e-16	4.82476e-15
	KLF6	6247.57	0.326126	0.0395426	8.24744	1.61824e-16	4.84705e-15
	ABTB2	392.37	1.00406	0.121771	8.24554	1.64417e-16	4.91415e-15
	HMGA1	4095.27	-0.376527	0.0456772	-8.24322	1.67639e-16	4.99974e-15
	RPL37	10577.2	-0.271251	0.0329611	-8.22943	1.88101e-16	5.59802e-15
	DEK	5051.18	-0.355991	0.0433208	-8.21757	2.07671e-16	6.16726e-15
	IGFBP5	654.608	-0.805124	0.0979917	-8.21624	2.09979e-16	6.22252e-15
	MYO1C	6411.04	-0.324662	0.0395985	-8.19885	2.42707e-16	7.17711e-15
	RRP12	2871.98	0.439765	0.053714	8.18715	2.67493e-16	7.8933e-15
	AK2	5182.65	-0.346792	0.0424179	-8.17561	2.94381e-16	8.66837e-15
	IQGAP1	10146.9	-0.272071	0.0332962	-8.17123	3.05265e-16	8.96988e-15
	CHDH	1935.65	-0.49647	0.0608119	-8.16403	3.24021e-16	9.50097e-15
	GLTSCR2	3618.38	-0.41931	0.0513944	-8.15867	3.38723e-16	9.91121e-15
	TSC22D3	77.29	1.6485	0.202246	8.15098	3.60989e-16	1.05406e-14
	ID4	2715.85	-0.447859	0.0550038	-8.14233	3.87756e-16	1.12985e-14
	SORBS1	513.998	-0.88634	0.108948	-8.13542	4.1052e-16	1.19368e-14
	EPAS1	904.917	0.715463	0.0879941	8.1308	4.26472e-16	1.23748e-14
	APOE	476.13	-0.92207	0.113444	-8.12798	4.36517e-16	1.26399e-14
	CD47	2624.86	-0.446356	0.054918	-8.12768	4.37569e-16	1.26441e-14
	EPS8L2	3006.17	-0.420579	0.0517595	-8.12564	4.45002e-16	1.28323e-14
	NXF1	2583.38	0.442213	0.0544675	8.11885	4.7064e-16	1.35435e-14
	CMPK2	180.247	-1.3409	0.165872	-8.08394	6.27056e-16	1.80075e-14
	UPP1	367.225	1.0337	0.127902	8.082	6.37148e-16	1.82597e-14
	SEPT5	357.291	-1.02664	0.12716	-8.0736	6.82559e-16	1.95209e-14
	ZNF704	495.946	-0.885819	0.109768	-8.06994	7.03349e-16	2.00743e-14
	EFCAB4A	990.838	-0.683906	0.0847672	-8.06804	7.14331e-16	2.0346e-14
	CARHSP1	2338.89	-0.460786	0.0571407	-8.06407	7.37957e-16	2.09761e-14
	XAF1	78.0041	-1.62236	0.201262	-8.06093	7.5719e-16	2.14789e-14
	RPL31	21644.1	-0.219816	0.0273293	-8.04324	8.74916e-16	2.47679e-14
	MAZ	9901.04	-0.293445	0.0365344	-8.03202	9.5884e-16	2.70887e-14
	EPT1	5516.12	-0.330122	0.0411267	-8.02695	9.99269e-16	2.81737e-14
	TMEM2	1995.44	-0.526572	0.0657095	-8.01363	1.11369e-15	3.13363e-14
	KLF2	1200.7	-0.668948	0.0834892	-8.01239	1.12504e-15	3.15919e-14
	PRR16	599.902	-0.829376	0.103526	-8.01129	1.13507e-15	3.18095e-14
	GTF2I	7292.39	-0.318763	0.0398079	-8.00753	1.1704e-15	3.27336e-14
	FKBP1A	3127.69	-0.416993	0.0521411	-7.99739	1.27082e-15	3.54708e-14
	C19orf43	7076.91	-0.327059	0.0409078	-7.99504	1.29537e-15	3.60838e-14
	RTP4	837.475	-0.713945	0.0895278	-7.97457	1.52917e-15	4.25117e-14
	ETV5	426.111	0.941719	0.118147	7.97075	1.57712e-15	4.37571e-14
	HIST2H2BE	576.503	0.83169	0.104634	7.94857	1.88673e-15	5.22433e-14
	PALM	853.419	-0.704761	0.0886794	-7.94729	1.90634e-15	5.26816e-14
	NFKBIB	867.518	0.685539	0.0863099	7.94277	1.97723e-15	5.45324e-14
	RPL18A	8125.59	-0.292948	0.0368996	-7.93906	2.03713e-15	5.60734e-14
	BCAM	331.198	-1.03773	0.130732	-7.93784	2.05726e-15	5.65159e-14
	GPR126	1624.96	-0.545352	0.0687855	-7.9283	2.22173e-15	6.09138e-14
	TPM4	19999.1	-0.225817	0.0284887	-7.92654	2.25332e-15	6.16058e-14
	GNG11	391.653	0.998758	0.126004	7.9264	2.25581e-15	6.16058e-14
	RPS14	14429.6	-0.253518	0.0319939	-7.92394	2.30104e-15	6.27179e-14
	SERPINI1	102.121	1.51905	0.191777	7.92091	2.35775e-15	6.41382e-14
	DYNC1H1	18644.2	-0.265555	0.0335554	-7.91391	2.49424e-15	6.77189e-14
	SRSF2	6135.33	-0.306389	0.0387206	-7.91282	2.51626e-15	6.81839e-14
	FAM78B	406.107	-0.94846	0.119928	-7.90859	2.60313e-15	7.04006e-14
	ITPRIPL2	4403.32	-0.371458	0.0470191	-7.90015	2.78563e-15	7.51903e-14
	LPHN1	9025.92	-0.27096	0.03441	-7.87443	3.42299e-15	9.22156e-14
	PPIA	12327.3	-0.253986	0.0323211	-7.85819	3.89714e-15	1.04786e-13
	PITPNM3	301.723	-1.05368	0.134205	-7.8513	4.11749e-15	1.10498e-13
	PLAUR	379.958	1.00479	0.128033	7.84787	4.23164e-15	1.13343e-13
	IFI44L	32.2913	-1.6187	0.2068	-7.82734	4.98298e-15	1.33211e-13
	ACACA	5880.65	-0.32938	0.0420878	-7.82601	5.03595e-15	1.34369e-13
	UBR5	10843.6	-0.266462	0.0340553	-7.82437	5.10191e-15	1.35869e-13
	FOSL1	717.229	0.734062	0.0938431	7.82223	5.18958e-15	1.3794e-13
	TRPS1	7101.6	-0.306202	0.0391681	-7.81765	5.38187e-15	1.42778e-13
	ANP32A	3573.91	-0.371518	0.0475952	-7.8058	5.91236e-15	1.56554e-13
	TM7SF2	690.73	-0.741938	0.0952132	-7.79239	6.57551e-15	1.73783e-13
	EIF1	6619.57	0.300586	0.0386598	7.77516	7.53504e-15	1.98765e-13
	CNTNAP2	594.518	-0.796636	0.102769	-7.75175	9.06368e-15	2.38187e-13
	CALM1	9711.44	-0.28401	0.0366382	-7.75176	9.06291e-15	2.38187e-13
	KLK13	241.34	-1.16498	0.150402	-7.74577	9.50064e-15	2.49199e-13
	MARCKSL1	4560.98	-0.333162	0.0430507	-7.73883	1.00338e-14	2.6269e-13
	ARHGAP28	1163.28	-0.617408	0.0798312	-7.73391	1.04291e-14	2.72525e-13
	KCNIP3	693.643	0.742235	0.0959994	7.73166	1.0615e-14	2.76865e-13
	CTTN	11228.3	0.247703	0.0321099	7.71423	1.21718e-14	3.16876e-13
	ALX4	755.025	-0.70556	0.0914784	-7.71286	1.23025e-14	3.19682e-13
	GAPDH	71108.3	-0.188875	0.0245104	-7.70591	1.29912e-14	3.36949e-13
	FAM84B	3822.46	0.364942	0.0473754	7.7032	1.32701e-14	3.43544e-13
	NTN1	2085.53	-0.452775	0.0587931	-7.70116	1.34833e-14	3.48413e-13
	ACTR1B	1868	-0.490372	0.0636922	-7.69909	1.37034e-14	3.53446e-13
	OASL	824.147	-0.720328	0.0935692	-7.69835	1.37836e-14	3.54857e-13
	RPL36	7543.56	-0.28177	0.0366043	-7.69773	1.38504e-14	3.5592e-13
	INSIG1	1272.38	-0.587855	0.0764527	-7.68914	1.48126e-14	3.79944e-13
	ARHGEF17	2306.71	-0.468522	0.0610042	-7.68016	1.5889e-14	4.06804e-13
	ARHGAP26	451.385	0.904056	0.117768	7.67658	1.63393e-14	4.17566e-13
	MCM6	3664.05	-0.358589	0.046748	-7.67069	1.71074e-14	4.36396e-13
	DACH1	101.873	-1.4684	0.191498	-7.66796	1.74752e-14	4.44963e-13
	ID3	3384.38	0.385553	0.0504057	7.64899	2.02566e-14	5.14843e-13
	RIPK2	1312.03	0.553348	0.0724222	7.64059	2.16222e-14	5.48549e-13
	STC2	447.609	0.878135	0.115125	7.62767	2.39026e-14	6.05302e-13
	ADAMTS5	685.853	-0.767786	0.100739	-7.62151	2.50733e-14	6.33796e-13
	FGFR2	813.163	-0.702729	0.0922432	-7.61823	2.57186e-14	6.48928e-13
	AARS	5977.01	0.307789	0.0404289	7.61308	2.67643e-14	6.74093e-13
	NEDD9	811.686	-0.687897	0.0903634	-7.61255	2.6873e-14	6.75609e-13
	SDC2	3442.21	-0.374398	0.0492348	-7.60433	2.86375e-14	7.18672e-13
	PLEKHG4B	1909.44	-0.493496	0.0649047	-7.6034	2.88455e-14	7.21294e-13
	FBXW7	1252.02	-0.563016	0.0740457	-7.60363	2.87944e-14	7.21294e-13
	THSD4	427.555	-0.890614	0.117139	-7.60304	2.8926e-14	7.22009e-13
	GOLGA7B	87.8552	1.5029	0.197993	7.5907	3.18184e-14	7.92785e-13
	EPB41L4B	1091.57	-0.639309	0.0842633	-7.58704	3.27293e-14	8.14024e-13
	SMARCC1	10489.5	-0.253549	0.0334588	-7.57795	3.51066e-14	8.71596e-13
	SLC1A3	555.574	0.837443	0.110538	7.57609	3.56127e-14	8.82587e-13
	RPL30	23277.8	-0.210518	0.0278086	-7.57026	3.72471e-14	9.21453e-13
	MARCKS	3659.88	-0.358164	0.0473143	-7.56989	3.73532e-14	9.22438e-13
	CDC42EP4	1873.95	-0.470001	0.0621307	-7.56471	3.88717e-14	9.58238e-13
	ZBTB42	475.269	-0.848844	0.112238	-7.5629	3.94194e-14	9.70024e-13
	CTDSP2	2433.11	-0.415982	0.0550663	-7.5542	4.21453e-14	1.03527e-12
	HIP1R	3588.17	-0.367459	0.0487352	-7.5399	4.70328e-14	1.1533e-12
	RCC2	8102.98	-0.269572	0.0358048	-7.52894	5.11543e-14	1.25216e-12
	C1orf116	1091.03	-0.590216	0.078518	-7.51695	5.60694e-14	1.37006e-12
	CLK1	1036.32	0.601961	0.0801459	7.51081	5.87608e-14	1.43331e-12
	EEF1D	11780.9	-0.245465	0.0326867	-7.50965	5.92848e-14	1.44356e-12
	TTC3	11032.3	-0.268822	0.0358511	-7.49828	6.46617e-14	1.57174e-12
	TAX1BP3	2099.09	-0.447329	0.0597367	-7.48834	6.97486e-14	1.69244e-12
	EVA1A	360.754	-0.935037	0.125078	-7.47565	7.68217e-14	1.86082e-12
	RASL11B	365.889	-0.93574	0.125409	-7.46151	8.55377e-14	2.06835e-12
	CLN6	2059.5	-0.443197	0.0594496	-7.455	8.9867e-14	2.16927e-12
	GBAS	1397.9	-0.533866	0.0716614	-7.44984	9.34515e-14	2.25189e-12
	FDFT1	1517.37	-0.510613	0.068551	-7.44866	9.42933e-14	2.26825e-12
	CASK	1916.44	-0.46476	0.0624471	-7.44246	9.88292e-14	2.37326e-12
	S100A1	4019.74	-0.342857	0.0460896	-7.43892	1.0151e-13	2.43345e-12
	RPS4X	25108.9	-0.213595	0.0287411	-7.43169	1.07219e-13	2.5659e-12
	VWA1	601.566	-0.77581	0.104429	-7.42908	1.09358e-13	2.61259e-12
	LASP1	5475.6	-0.299536	0.0403454	-7.42428	1.13393e-13	2.70434e-12
	ILF3	13845	-0.229894	0.0309674	-7.42374	1.13856e-13	2.71074e-12
	L1CAM	1109.64	-0.593592	0.0799821	-7.42156	1.15752e-13	2.75119e-12
	SIRT2	1288.95	0.540405	0.072964	7.40646	1.29712e-13	3.07773e-12
	CDK6	14474.8	-0.224409	0.0303156	-7.40245	1.33698e-13	3.16691e-12
	IGF1R	3699.46	-0.355429	0.0480183	-7.40195	1.34201e-13	3.17344e-12
	GLUL	2938.38	-0.377568	0.0510208	-7.40028	1.35898e-13	3.20812e-12
	PSPH	694.276	0.71569	0.0967487	7.39741	1.38865e-13	3.2726e-12
	IRF7	339.884	-0.951626	0.128649	-7.39705	1.39245e-13	3.27602e-12
	ADCY7	1338.11	-0.528182	0.0714209	-7.39534	1.41046e-13	3.31279e-12
	CARS	1744.06	0.478868	0.0647927	7.39076	1.45988e-13	3.42311e-12
	DDIT4	1835.31	0.459521	0.0622045	7.38726	1.49881e-13	3.50848e-12
	GHITM	3650.14	0.346941	0.0469786	7.38509	1.52348e-13	3.56024e-12
	VAV2	2294.78	-0.420054	0.0569391	-7.37725	1.61593e-13	3.76996e-12
	PSD4	980.278	-0.603035	0.0817512	-7.37647	1.6254e-13	3.78573e-12
	KMO	101.919	1.41864	0.192365	7.37476	1.64646e-13	3.82837e-12
	IRS1	1782.13	-0.468106	0.0634934	-7.37252	1.67432e-13	3.88018e-12
	CCDC34	1554.73	-0.493838	0.0669823	-7.37266	1.67254e-13	3.88018e-12
	DNAJC3	640.476	0.730498	0.0991937	7.36436	1.77996e-13	4.11816e-12
	CD82	2528.6	-0.440492	0.0598904	-7.35496	1.90981e-13	4.41125e-12
	SLFN13	1220.99	-0.547512	0.0744769	-7.35143	1.96104e-13	4.52207e-12
	RHOV	3179.05	0.364509	0.0496079	7.3478	2.01489e-13	4.63858e-12
	LRP5	3008.88	-0.380716	0.0518241	-7.3463	2.03765e-13	4.68323e-12
	APP	36966.6	-0.21442	0.0291886	-7.34603	2.04186e-13	4.68518e-12
	LAMB3	1064.96	0.593022	0.0807762	7.34154	2.11155e-13	4.83713e-12
	ST5	952.042	-0.610394	0.0832004	-7.33642	2.19377e-13	5.01721e-12
	INF2	2280.26	-0.424683	0.0579157	-7.33277	2.25437e-13	5.14734e-12
	OBSL1	818.598	-0.662698	0.0904274	-7.32851	2.3273e-13	5.30517e-12
	GNG12	3655.89	0.355238	0.0485613	7.31525	2.56896e-13	5.83695e-12
	ETS1	881.945	0.630091	0.0861322	7.31539	2.56631e-13	5.83695e-12
	CITED2	2385.73	0.412632	0.0564178	7.31385	2.5959e-13	5.88856e-12
	LAD1	3786.55	-0.336624	0.0460611	-7.30819	2.70758e-13	6.13191e-12
	CYTH3	6877.44	-0.281127	0.0386077	-7.28164	3.29784e-13	7.45655e-12
	C3	310.524	0.971736	0.133545	7.27649	3.42621e-13	7.73424e-12
	RPL14	8435.92	-0.276168	0.0380259	-7.26262	3.79672e-13	8.55676e-12
	RASAL2	3159.18	-0.359249	0.049539	-7.25184	4.11137e-13	9.25092e-12
	EHF	2785.07	-0.390992	0.0539248	-7.2507	4.14611e-13	9.31403e-12
	EFNA5	1773.9	-0.466911	0.0644331	-7.24645	4.2784e-13	9.59575e-12
	KAZN	1075.37	-0.576047	0.0794989	-7.24597	4.29345e-13	9.61401e-12
	LRRFIP2	1389.73	0.510276	0.0705939	7.22833	4.8898e-13	1.09318e-11
	COL5A1	1228.88	-0.572311	0.079298	-7.21721	5.30632e-13	1.1844e-11
	CBX5	4684.86	-0.346363	0.0480688	-7.20557	5.78033e-13	1.28813e-11
	RPL29	8121.38	-0.262519	0.0364751	-7.19722	6.14541e-13	1.3673e-11
	VGLL1	846.834	-0.647576	0.0901157	-7.18605	6.66919e-13	1.48148e-11
	ENSA	6335.79	-0.286027	0.039837	-7.17993	6.97457e-13	1.54684e-11
	TEAD2	2432.37	-0.404139	0.0563598	-7.1707	7.46148e-13	1.6522e-11
	AGPAT9	197.394	1.13352	0.158139	7.16786	7.61787e-13	1.68415e-11
	LAMB1	2415.35	-0.401998	0.0560931	-7.16662	7.68714e-13	1.6947e-11
	IRF2BPL	803.959	-0.646855	0.0902601	-7.16657	7.68992e-13	1.6947e-11
	SEPT10	1543.84	-0.492233	0.0688269	-7.15175	8.56816e-13	1.88527e-11
	MSH6	4757.28	-0.311495	0.0435958	-7.14508	8.99425e-13	1.9759e-11
	MSN	8527.14	-0.247282	0.0346595	-7.13461	9.70626e-13	2.12896e-11
	DIP2B	2875.46	-0.380394	0.0533641	-7.12828	1.0163e-12	2.22563e-11
	SUPT5H	6813.93	0.273891	0.0384538	7.1226	1.05912e-12	2.31576e-11
	TACSTD2	11162.8	-0.445491	0.0625539	-7.12171	1.06594e-12	2.32702e-11
	FADS1	1699.99	-0.459139	0.0645382	-7.11422	1.12544e-12	2.45307e-11
	HNRNPK	21428	-0.198732	0.0279512	-7.10998	1.16059e-12	2.52574e-11
	FAM46C	141.373	1.27257	0.179108	7.10508	1.20254e-12	2.61295e-11
	TPM2	544.423	-0.76473	0.107667	-7.10273	1.22313e-12	2.65355e-11
	VEGFA	805.425	0.637751	0.0898115	7.10099	1.23868e-12	2.6831e-11
	HSPA4L	1205.68	0.54852	0.0773508	7.09133	1.32831e-12	2.86833e-11
	UGT8	2539.59	-0.398627	0.0562123	-7.09147	1.32696e-12	2.86833e-11
	SLC12A2	2107.33	0.426457	0.0601641	7.08823	1.35838e-12	2.92873e-11
	NCEH1	317.924	0.932928	0.131752	7.08094	1.43177e-12	3.08219e-11
	RCN1	2064.75	-0.42095	0.059553	-7.06849	1.5663e-12	3.36657e-11
	GARS	7768.85	0.259266	0.036729	7.05889	1.67843e-12	3.60202e-11
	TLN2	1818.96	-0.447173	0.063393	-7.05398	1.73874e-12	3.72572e-11
	ERP27	712.239	-0.691761	0.0981007	-7.05154	1.76951e-12	3.78582e-11
	SOX10	4791.69	-0.310749	0.044079	-7.04983	1.79142e-12	3.82682e-11
	HADH	1540.01	-0.480463	0.0681627	-7.04878	1.80499e-12	3.84991e-11
	SFXN3	591.23	0.718348	0.10216	7.0316	2.04172e-12	4.34818e-11
	AKAP8L	2905.7	0.376738	0.0535868	7.03041	2.05921e-12	4.37873e-11
	WARS	2260.66	0.417038	0.0593493	7.02684	2.11264e-12	4.4855e-11
	HAND2	772.578	-0.655606	0.0933653	-7.02194	2.1881e-12	4.63825e-11
	QARS	4945.57	-0.292755	0.0416927	-7.02174	2.19125e-12	4.63825e-11
	SLC25A3	9166.97	-0.237244	0.033822	-7.0145	2.30775e-12	4.87744e-11
	ALDH5A1	201.936	-1.09111	0.15576	-7.00508	2.46852e-12	5.20933e-11
	NRP2	83.0678	1.39523	0.199251	7.00239	2.5163e-12	5.30213e-11
	DNAJC2	1650.4	0.458098	0.0654403	7.00024	2.55523e-12	5.37601e-11
	RPL11	13389	-0.21961	0.0313859	-6.99711	2.61292e-12	5.48911e-11
	PLA2G6	319.553	0.952688	0.136159	6.99687	2.61742e-12	5.49027e-11
	NFKB1	1580.91	0.463586	0.0663163	6.99052	2.73871e-12	5.73606e-11
	RYR1	204.49	-1.08006	0.154704	-6.98149	2.92068e-12	6.108e-11
	TIPARP	735.873	0.664986	0.0952809	6.97922	2.96817e-12	6.198e-11
	AXIN2	73.2298	-1.41171	0.202555	-6.96955	3.17958e-12	6.62953e-11
	TUB	397.584	-0.85664	0.122937	-6.96811	3.21218e-12	6.68748e-11
	CYBRD1	2553.91	-0.42609	0.0611699	-6.96567	3.26839e-12	6.79435e-11
	STRAP	5202.16	0.289461	0.0415569	6.96542	3.27434e-12	6.79658e-11
	PHLDB2	249.897	1.01054	0.145297	6.95497	3.52627e-12	7.30861e-11
	HYOU1	2334.38	0.394869	0.0567774	6.95469	3.53329e-12	7.31227e-11
	MYO10	3798.47	0.327899	0.0471512	6.9542	3.54556e-12	7.32678e-11
	SGK223	805.057	-0.62383	0.0897449	-6.95115	3.62309e-12	7.47591e-11
	VAMP1	218.561	1.07032	0.154017	6.94931	3.67077e-12	7.56308e-11
	FGFR3	220.741	-1.05661	0.152075	-6.948	3.705e-12	7.62235e-11
	MYH9	28147.1	-0.184482	0.0265533	-6.94761	3.71522e-12	7.63208e-11
	KLHL18	1207.88	0.522223	0.0751998	6.94448	3.79869e-12	7.79207e-11
	LTF	15565.8	-0.585241	0.0842908	-6.94312	3.83545e-12	7.8559e-11
	STX3	2197.29	0.410136	0.0591177	6.93762	3.9877e-12	8.15575e-11
	OPTN	1666.35	0.464537	0.0670366	6.9296	4.22033e-12	8.61888e-11
	VIM	2856.1	-0.368466	0.0531771	-6.92904	4.23721e-12	8.64068e-11
	BIK	294.4	0.972089	0.140584	6.91462	4.69111e-12	9.55232e-11
	SCMH1	5212.98	-0.284354	0.0411458	-6.91089	4.81633e-12	9.79298e-11
	LZTS3	1634.91	-0.457823	0.0662805	-6.90735	4.93776e-12	1.00127e-10
	RPS16	17114	-0.228841	0.0331301	-6.90733	4.93875e-12	1.00127e-10
	LPPR3	337.104	-0.882857	0.127942	-6.90045	5.1839e-12	1.04944e-10
	MOV10	1118.6	-0.547715	0.079398	-6.89834	5.26127e-12	1.06356e-10
	ATP6V0B	4423.12	0.306438	0.0444811	6.88918	5.61155e-12	1.13272e-10
	TALDO1	5050.45	-0.288929	0.0419441	-6.88843	5.6413e-12	1.13708e-10
	NAB2	633.266	-0.691933	0.100491	-6.88555	5.75649e-12	1.15528e-10
	KTN1	6374.58	-0.27828	0.0404144	-6.88567	5.75157e-12	1.15528e-10
	JPH2	867.615	-0.602569	0.0875117	-6.88558	5.75534e-12	1.15528e-10
	LAMA5	2953.71	-0.364356	0.0529874	-6.87627	6.14386e-12	1.23125e-10
	LRP8	2538.18	-0.378513	0.0551456	-6.86389	6.70092e-12	1.34095e-10
	SRSF1	6280.09	-0.262751	0.0382865	-6.86275	6.7549e-12	1.34982e-10
	TTYH3	5857.76	-0.270071	0.0394332	-6.84882	7.44607e-12	1.4858e-10
	CKB	1439.84	-0.513212	0.075065	-6.8369	8.09255e-12	1.61249e-10
	CD9	3720.23	-0.319902	0.0468472	-6.82863	8.5729e-12	1.70576e-10
	S100A10	6117.9	-0.271615	0.0397786	-6.82818	8.59995e-12	1.7087e-10
	ZMIZ2	5227.76	0.287652	0.0421402	6.82607	8.72751e-12	1.73158e-10
	TARS	4244.78	0.30485	0.0446614	6.82579	8.74427e-12	1.73244e-10
	PLA2G4C	66.5064	1.40228	0.205647	6.8189	9.174e-12	1.81499e-10
	CREB3	775.986	0.620909	0.0910769	6.81741	9.26956e-12	1.8313e-10
	C8orf33	3540.14	0.332565	0.0488492	6.80798	9.89761e-12	1.94984e-10
	LPL	1642.16	-0.47258	0.0694145	-6.80808	9.89066e-12	1.94984e-10
	NCL	16598	-0.224794	0.0330253	-6.80674	9.9836e-12	1.96401e-10
	TRAF4	3710.94	0.316598	0.0466168	6.7915	1.1097e-11	2.17996e-10
	ROCK2	4022.11	0.31219	0.0459885	6.78843	1.13357e-11	2.22372e-10
	MSX1	325.84	-0.888883	0.130988	-6.78601	1.15279e-11	2.25823e-10
	PROM1	6670.02	-0.276556	0.0408171	-6.77548	1.23996e-11	2.42559e-10
	SCD	18405.1	-0.586829	0.0866234	-6.77448	1.24851e-11	2.43889e-10
	COL4A1	884.068	-0.585221	0.0864343	-6.7707	1.28157e-11	2.49996e-10
	ZNF521	849.056	-0.586208	0.0866246	-6.76722	1.31277e-11	2.55724e-10
	HAPLN3	476.192	-0.765247	0.113133	-6.76413	1.34113e-11	2.60884e-10
	CALCB	154.123	1.15696	0.171089	6.76232	1.35801e-11	2.63798e-10
	OSBPL1A	3201.5	-0.335487	0.049671	-6.75419	1.43634e-11	2.78627e-10
	TRIM24	1762.69	-0.430972	0.0638676	-6.74789	1.50006e-11	2.90178e-10
	KDM2B	1658.39	-0.438955	0.0650494	-6.74802	1.49877e-11	2.90178e-10
	NPEPL1	504.716	-0.733829	0.108869	-6.74051	1.57836e-11	3.04902e-10
	ANXA6	1810.39	-0.457335	0.0678998	-6.73545	1.63426e-11	3.15263e-10
	TKT	12807.2	-0.207483	0.0308402	-6.72768	1.72394e-11	3.32104e-10
	HRCT1	132.646	-1.19328	0.177418	-6.72582	1.74606e-11	3.35899e-10
	SCD5	3175.51	-0.342017	0.0508836	-6.72155	1.798e-11	3.45414e-10
	IQCG	872.732	0.58722	0.0873682	6.72121	1.80226e-11	3.45756e-10
	LIMA1	2403.76	-0.386496	0.0575806	-6.71226	1.91629e-11	3.668e-10
	HIST1H2BD	143.602	1.18605	0.176701	6.71219	1.91722e-11	3.668e-10
	CELF2	1256.13	-0.502469	0.0748628	-6.71187	1.92141e-11	3.67097e-10
	NDST1	4241.12	-0.305534	0.0455873	-6.70217	2.05351e-11	3.91798e-10
	PPP2R5B	359.889	0.839778	0.125311	6.70156	2.06211e-11	3.92901e-10
	ST14	3314.9	-0.338962	0.0505982	-6.69908	2.09737e-11	3.99074e-10
	MYOF	7640.19	0.242788	0.0362594	6.69587	2.14393e-11	4.07376e-10
	GIPC1	10714.4	-0.21875	0.032671	-6.69553	2.14885e-11	4.07755e-10
	IARS	10563.4	0.227669	0.0340045	6.69527	2.1528e-11	4.07948e-10
	FLYWCH1	882.975	0.574605	0.0859268	6.68714	2.27576e-11	4.30664e-10
	HLA-B	665.558	0.660415	0.0987832	6.6855	2.3014e-11	4.34924e-10
	BAG3	1642.63	0.436904	0.0653755	6.683	2.34097e-11	4.41803e-10
	SLC44A1	3661.49	-0.331143	0.049591	-6.67749	2.43067e-11	4.5811e-10
	CHST3	1021.51	-0.53866	0.0807657	-6.66941	2.56832e-11	4.834e-10
	MYB	2559.26	-0.368904	0.0553543	-6.6644	2.6574e-11	4.99491e-10
	PSMC4	3886.85	0.316013	0.0474912	6.65414	2.84966e-11	5.34907e-10
	SHROOM3	4298.54	-0.321137	0.0482654	-6.65357	2.86061e-11	5.36239e-10
	PMPCB	1182.3	-0.523713	0.0787323	-6.65182	2.89481e-11	5.41921e-10
	ELF4	1703.55	-0.425314	0.0639642	-6.64926	2.94568e-11	5.50704e-10
	ATHL1	645.543	-0.691692	0.104106	-6.64411	3.05053e-11	5.69541e-10
	DPF2	1627.73	0.435159	0.0655127	6.64237	3.08684e-11	5.75549e-10
	KLHL23	3223.25	-0.335703	0.0505727	-6.63804	3.17892e-11	5.91925e-10
	NPTN	2565.21	-0.359798	0.054294	-6.62685	3.42932e-11	6.37697e-10
	WDR34	3409.25	-0.332955	0.0503001	-6.61937	3.60724e-11	6.69889e-10
	KRT18	7173.32	-0.252322	0.0381856	-6.60777	3.90144e-11	7.23559e-10
	CENPF	11447.5	-0.213426	0.0323259	-6.60232	4.04775e-11	7.49695e-10
	KANK2	443.724	-0.765452	0.116027	-6.59721	4.18961e-11	7.7494e-10
	RBMS3	426.867	-0.766351	0.116424	-6.58239	4.62948e-11	8.55165e-10
	TMEM63C	661.648	-0.634456	0.0964713	-6.57663	4.81241e-11	8.87778e-10
	PTP4A3	1055.49	-0.553486	0.0841846	-6.57467	4.87603e-11	8.98325e-10
	RPL23	14779.8	-0.200904	0.0305598	-6.5741	4.89476e-11	9.00583e-10
	ARPC1B	2928.31	-0.353134	0.0538468	-6.55813	5.44869e-11	1.00061e-09
	EFS	633.832	-0.646653	0.0986049	-6.55802	5.45279e-11	1.00061e-09
	SPIDR	2371.68	-0.36523	0.0557155	-6.55527	5.55412e-11	1.01787e-09
	SLC25A40	2359.83	-0.366912	0.0559782	-6.55456	5.58074e-11	1.0214e-09
	DARS2	2497.17	-0.365739	0.0558308	-6.55085	5.72103e-11	1.0457e-09
	FHL2	635.605	-0.64814	0.0991138	-6.53935	6.1786e-11	1.12786e-09
	CUL7	915.259	-0.559373	0.0855747	-6.53667	6.29035e-11	1.14675e-09
	HIST1H1C	717.691	0.619585	0.0948055	6.53533	6.34703e-11	1.15557e-09
	CAPRIN1	14744.3	-0.219195	0.0335613	-6.53118	6.52553e-11	1.18652e-09
	TRIM47	830.587	-0.574618	0.0879874	-6.53069	6.54684e-11	1.18884e-09
	IL1R1	194.918	-1.03069	0.157868	-6.52878	6.63095e-11	1.20255e-09
	LEPROT	1137.88	-0.507203	0.0778562	-6.51461	7.28773e-11	1.31994e-09
	LGR5	96.0049	1.25541	0.192753	6.51306	7.36349e-11	1.3315e-09
	RPL15	10851.5	-0.21404	0.0328639	-6.51291	7.37069e-11	1.3315e-09
	RPL37A	12324	-0.21151	0.0325037	-6.50725	7.654e-11	1.38089e-09
	CPSF6	2865.14	-0.347372	0.053407	-6.50423	7.80914e-11	1.40706e-09
	ERBB2	1865.81	-0.432451	0.0665111	-6.50193	7.92934e-11	1.42687e-09
	MATR3	8703.47	-0.243211	0.0374113	-6.501	7.97854e-11	1.43387e-09
	RNPEP	2496.42	-0.363501	0.0559179	-6.50062	7.99886e-11	1.43567e-09
	MXD4	1343.87	-0.463011	0.0712405	-6.49926	8.07135e-11	1.44682e-09
	IMPA1	631.866	0.650566	0.100154	6.49565	8.26743e-11	1.48006e-09
	KCNK5	417.91	-0.783011	0.120565	-6.49453	8.32948e-11	1.48926e-09
	SEMA3F	1140.16	-0.503293	0.0775363	-6.49106	8.52356e-11	1.522e-09
	C9orf152	32.8907	1.34976	0.208119	6.48551	8.8434e-11	1.57709e-09
	COL17A1	52.2478	1.35884	0.209613	6.48262	9.01411e-11	1.60548e-09
	HTR6	159.746	-1.0995	0.169861	-6.47291	9.61327e-11	1.71001e-09
	MCM2	5744.84	-0.261393	0.0404929	-6.45529	1.08014e-10	1.9189e-09
	DLG3	725.669	-0.632129	0.0979404	-6.45422	1.08778e-10	1.93001e-09
	CTNNB1	15182.1	-0.200245	0.0310338	-6.4525	1.10023e-10	1.94963e-09
	TPM3	15587.4	-0.191592	0.029711	-6.44852	1.12945e-10	1.99885e-09
	RPS28	4957.78	-0.296935	0.0460637	-6.44619	1.14699e-10	2.02731e-09
	FZD8	146.54	1.13377	0.176369	6.42839	1.28963e-10	2.27107e-09
	ELL2	296.212	0.871834	0.135623	6.42837	1.28979e-10	2.27107e-09
	ATP13A5	596.298	-0.650553	0.101196	-6.42862	1.28771e-10	2.27107e-09
	DDR1	6560.29	0.243206	0.0378503	6.42547	1.31465e-10	2.31193e-09
	AFAP1	2971.73	-0.328668	0.0511681	-6.4233	1.33352e-10	2.34216e-09
	HEG1	228.853	-0.972086	0.151381	-6.42144	1.34988e-10	2.36791e-09
	COLEC12	207.623	-0.987531	0.153857	-6.41848	1.37641e-10	2.4114e-09
	CDK4	3483.53	-0.306164	0.0477635	-6.41001	1.45514e-10	2.54613e-09
	PPP1R13L	1743.03	-0.41211	0.0643032	-6.40886	1.46611e-10	2.5621e-09
	TOMM34	2328.49	0.380509	0.0594241	6.40329	1.52069e-10	2.65415e-09
	RPS7	11101.5	-0.219484	0.0342782	-6.40303	1.52327e-10	2.65533e-09
	PEAK1	1291.24	-0.480641	0.0750761	-6.40205	1.53309e-10	2.66911e-09
	CTBP2	4292.53	-0.298473	0.0466333	-6.40043	1.54938e-10	2.6941e-09
	ATAD2	7792.71	-0.229982	0.0359431	-6.39851	1.56898e-10	2.72478e-09
	RPL28	13027.9	-0.223663	0.0349763	-6.39471	1.60852e-10	2.78998e-09
	SLC2A6	905.484	0.540113	0.084537	6.38908	1.66889e-10	2.89108e-09
	ATP8A2	60.4313	1.32736	0.208013	6.38111	1.75807e-10	3.04179e-09
	HMOX1	215.572	0.99278	0.155612	6.37983	1.77288e-10	3.0636e-09
	GPX7	61.5745	-1.3153	0.206206	-6.37856	1.78762e-10	3.08526e-09
	MT-CO2	92807.4	-0.183414	0.0287568	-6.37812	1.79278e-10	3.09033e-09
	BARX2	1703.48	-0.420483	0.0659288	-6.37782	1.79621e-10	3.09242e-09
	PTOV1	2185.87	-0.380658	0.0596951	-6.3767	1.80946e-10	3.10754e-09
	LGALS9	222.179	-0.97151	0.152351	-6.37678	1.80849e-10	3.10754e-09
	AQP4	111.87	-1.17928	0.185015	-6.37396	1.84207e-10	3.15965e-09
	IFI27	39.3518	-1.3378	0.209931	-6.37259	1.85863e-10	3.18414e-09
	KRT6A	826.996	-0.571941	0.0898322	-6.36677	1.93049e-10	3.30317e-09
	NUAK2	351.879	0.802373	0.126069	6.36454	1.95876e-10	3.34565e-09
	CLDN3	5294.92	-0.275241	0.0432467	-6.36443	1.96012e-10	3.34565e-09
	TGFBR1	1617.54	0.419719	0.0659717	6.3621	1.99009e-10	3.39266e-09
	KLF5	775.038	0.576551	0.0907766	6.35132	2.13469e-10	3.63472e-09
	TYMS	3211.52	-0.32659	0.0514273	-6.35051	2.14599e-10	3.64949e-09
	INSR	2029.66	-0.38137	0.0601393	-6.34144	2.27625e-10	3.86629e-09
	KIAA1522	5018.02	-0.266506	0.042035	-6.34009	2.2963e-10	3.89559e-09
	EHBP1L1	1445.06	-0.449692	0.0709685	-6.33651	2.35029e-10	3.98234e-09
	ZBTB18	1443.68	-0.438816	0.0692586	-6.3359	2.35953e-10	3.99314e-09
	B2M	9427.08	0.216068	0.0341171	6.33313	2.40234e-10	4.06065e-09
	ARL5A	1383.37	-0.445515	0.0703781	-6.33031	2.44674e-10	4.13069e-09
	ADAMTSL4	181.69	-1.0564	0.167072	-6.32301	2.56513e-10	4.32533e-09
	TMEM164	1977.33	-0.391136	0.0619578	-6.31293	2.73793e-10	4.61111e-09
	PXK	336.419	0.821691	0.130226	6.30971	2.79556e-10	4.70248e-09
	GNAQ	3948.22	-0.323594	0.0513123	-6.30637	2.85658e-10	4.79934e-09
	TLDC1	1485.95	-0.439447	0.0696971	-6.3051	2.8801e-10	4.83301e-09
	MFAP2	801.638	-0.578538	0.0917711	-6.30415	2.89789e-10	4.85702e-09
	MSLN	1867.14	-0.389478	0.0618365	-6.29851	3.0052e-10	5.02492e-09
	RBBP4	4024.95	-0.285378	0.0453089	-6.29851	3.00528e-10	5.02492e-09
	UGCG	2260.94	0.381822	0.0606514	6.29535	3.06708e-10	5.1221e-09
	REC8	49.6278	-1.31796	0.209416	-6.2935	3.10391e-10	5.1774e-09
	GMPS	4138.55	-0.286523	0.0455385	-6.29188	3.13647e-10	5.22544e-09
	TANC1	2256.85	-0.391479	0.0622712	-6.28667	3.24338e-10	5.39066e-09
	B4GALT5	4313.18	-0.321927	0.0512064	-6.28685	3.23968e-10	5.39066e-09
	RPL18	15522	-0.208348	0.0331425	-6.28644	3.24829e-10	5.3924e-09
	PSMD2	12345.9	0.198227	0.0315375	6.28544	3.26933e-10	5.42087e-09
	EIF4G3	3384.04	-0.302289	0.0481156	-6.28256	3.33044e-10	5.51562e-09
	NIPAL2	303.328	-0.870876	0.13864	-6.28158	3.35154e-10	5.54398e-09
	PCNA	4680.74	-0.281169	0.044793	-6.27709	3.44979e-10	5.69972e-09
	AKT1	4387.29	-0.275574	0.0439131	-6.27544	3.48637e-10	5.74653e-09
	WDR6	4282.12	-0.27969	0.0445687	-6.27547	3.4857e-10	5.74653e-09
	SDC3	1023.76	-0.504649	0.0804392	-6.27367	3.52627e-10	5.80542e-09
	HIST1H4H	128.758	1.12813	0.179941	6.26944	3.62347e-10	5.95841e-09
	SFRP1	6309.85	0.249854	0.0399334	6.25678	3.92997e-10	6.44738e-09
	RAB20	349.41	-0.787632	0.125885	-6.25678	3.93009e-10	6.44738e-09
	SMC4	8397.45	-0.219588	0.035153	-6.24664	4.1937e-10	6.87175e-09
	CALD1	8441.91	-0.415801	0.0665698	-6.24608	4.20874e-10	6.8883e-09
	DCAF13	4252.65	0.288831	0.0462579	6.24393	4.26705e-10	6.97073e-09
	PGBD5	4789.9	-0.271022	0.0434062	-6.24386	4.26912e-10	6.97073e-09
	BUD31	1267.48	0.457108	0.0732172	6.24318	4.28767e-10	6.99281e-09
	LURAP1L	747.446	-0.577522	0.0925366	-6.24101	4.34743e-10	7.08198e-09
	HMGB2	5400.47	-0.264193	0.0424137	-6.22895	4.69558e-10	7.64019e-09
	IGSF23	301.419	-0.846858	0.13598	-6.2278	4.73025e-10	7.68762e-09
	SLC1A4	1315.49	0.462722	0.0743329	6.22499	4.81573e-10	7.81742e-09
	BRMS1	1219.87	0.463751	0.0745939	6.21701	5.06702e-10	8.21577e-09
	PLTP	2166.16	-0.364298	0.0586117	-6.21544	5.11804e-10	8.28885e-09
	HIST1H2BK	1041.18	0.502745	0.0810479	6.20306	5.53752e-10	8.95778e-09
	S100A11	8927.57	-0.234929	0.0378933	-6.19975	5.6554e-10	9.13787e-09
	GRHL1	2079.12	-0.366363	0.0591072	-6.19828	5.70819e-10	9.21248e-09
	RANGAP1	4531.34	0.268559	0.0433384	6.1968	5.76212e-10	9.28874e-09
	ABHD2	2030.29	-0.369384	0.0596207	-6.19556	5.8077e-10	9.3514e-09
	STK17A	551.711	0.647861	0.104596	6.19394	5.86775e-10	9.43719e-09
	FAM171B	385.372	-0.74874	0.12092	-6.19201	5.9402e-10	9.54268e-09
	ICOSLG	1071.16	0.501875	0.0810971	6.18857	6.07132e-10	9.7421e-09
	CCNL1	1490.09	0.435	0.0703291	6.18521	6.20203e-10	9.94037e-09
	RGMA	347.074	-0.781394	0.126341	-6.18478	6.21893e-10	9.956e-09
	PIGT	2392.3	0.344756	0.0557923	6.17927	6.43981e-10	1.02978e-08
	ADM2	821.688	0.544418	0.0881341	6.17716	6.52649e-10	1.04244e-08
	AP5Z1	1364	0.454329	0.0735797	6.17466	6.63065e-10	1.05787e-08
	ITPR1	237.51	0.928351	0.150482	6.16917	6.86509e-10	1.09402e-08
	CPNE1	4660.51	0.264872	0.0429756	6.16331	7.12401e-10	1.13398e-08
	CD151	6058.46	-0.258721	0.041981	-6.16282	7.14589e-10	1.13616e-08
	GPC1	564.111	-0.635709	0.103163	-6.16221	7.17387e-10	1.13931e-08
	DLX2	117.959	1.13797	0.184691	6.16147	7.20736e-10	1.14333e-08
	SCAMP3	3168.71	0.315795	0.051257	6.16101	7.22838e-10	1.14536e-08
	TNFRSF10B	1791.68	0.388899	0.0631274	6.16055	7.24928e-10	1.14736e-08
	KLK10	4154.09	-0.301346	0.0489334	-6.15828	7.35385e-10	1.16259e-08
	B4GALT2	2390.61	-0.341872	0.0555476	-6.15458	7.5277e-10	1.18738e-08
	PCDH1	511.736	-0.665752	0.108171	-6.15464	7.52496e-10	1.18738e-08
	ERRFI1	3762.19	0.285292	0.0463585	6.15403	7.55364e-10	1.19013e-08
	HCFC1	6153.67	-0.259698	0.0422383	-6.1484	7.82665e-10	1.23175e-08
	FGFR1	4016.24	-0.28787	0.0468824	-6.14025	8.23899e-10	1.29243e-08
	AHNAK	29903.4	-0.316244	0.0515036	-6.14023	8.2401e-10	1.29243e-08
	CDC42SE2	3087.17	-0.316485	0.0515409	-6.14046	8.22848e-10	1.29243e-08
	SPEN	5340.79	-0.284777	0.0464286	-6.13365	8.58863e-10	1.34558e-08
	ADIRF	66.5536	1.25298	0.204416	6.12957	8.81147e-10	1.37894e-08
	LBR	3117.99	-0.3152	0.0514586	-6.12532	9.05036e-10	1.41474e-08
	SLC11A2	1584.04	-0.417143	0.0681082	-6.12472	9.08459e-10	1.4185e-08
	CDC20	16232.2	0.192272	0.0314023	6.12288	9.18983e-10	1.43333e-08
	ULBP1	63.8546	1.25849	0.205548	6.12261	9.20529e-10	1.43413e-08
	HYI	468.498	-0.699165	0.114295	-6.1172	9.52344e-10	1.48204e-08
	LYPD3	563.249	0.643283	0.10527	6.1108	9.91315e-10	1.54096e-08
	PRRC2C	19722.4	-0.184572	0.0302155	-6.10854	1.0055e-09	1.56127e-08
	C8orf46	80.983	1.23268	0.201872	6.10621	1.02024e-09	1.58239e-08
	CAD	7709.09	-0.230946	0.0378355	-6.10394	1.03487e-09	1.60152e-08
	RBBP7	3996.46	-0.275199	0.0450852	-6.10399	1.03456e-09	1.60152e-08
	SLC38A10	1097.54	-0.476446	0.0781285	-6.09823	1.07249e-09	1.65758e-08
	DSG3	2710.24	-0.35157	0.0576525	-6.09808	1.07347e-09	1.65758e-08
	IFI44	191.01	-0.966338	0.158511	-6.09634	1.08523e-09	1.67387e-08
	OSBPL5	560.274	-0.637409	0.104615	-6.09289	1.1089e-09	1.70849e-08
	INA	81.6532	1.22897	0.20173	6.09216	1.11396e-09	1.71439e-08
	CYLD	419.588	0.713891	0.117211	6.09064	1.12458e-09	1.72882e-08
	NFIB	1682.38	-0.400912	0.0658313	-6.09	1.12911e-09	1.73387e-08
	NMNAT1	287.95	0.829079	0.136288	6.0833	1.17734e-09	1.80595e-08
	GLA	732.387	0.563439	0.0926629	6.08052	1.19796e-09	1.83555e-08
	TRIM25	3262.99	-0.305686	0.0502992	-6.07736	1.22179e-09	1.87001e-08
	PFKP	3368.75	-0.293534	0.0483014	-6.07714	1.22348e-09	1.87053e-08
	HDLBP	10868.2	-0.216263	0.0356259	-6.07038	1.27605e-09	1.94877e-08
	LSM14A	4559.24	-0.262834	0.0433058	-6.06926	1.28503e-09	1.96034e-08
	GADD45B	833.936	-0.537922	0.0887176	-6.06331	1.33351e-09	2.03208e-08
	IFNGR1	2206.86	0.356486	0.0588943	6.05299	1.42184e-09	2.16194e-08
	PICALM	5442.26	0.250939	0.0414566	6.05305	1.42132e-09	2.16194e-08
	EVPL	1062.32	-0.479618	0.0792459	-6.05228	1.42812e-09	2.16912e-08
	ATAD3B	1031.1	0.549632	0.0908343	6.05093	1.44014e-09	2.185e-08
	TSPYL2	1422.98	0.446883	0.073857	6.05065	1.44265e-09	2.18642e-08
	SELM	845.319	0.532318	0.0880521	6.04549	1.48961e-09	2.25514e-08
	SPTB	361.838	-0.763139	0.126291	-6.04272	1.51533e-09	2.29159e-08
	DUT	1586.25	-0.419123	0.069444	-6.0354	1.58568e-09	2.39537e-08
	RGS2	98.1664	1.16054	0.192301	6.035	1.58967e-09	2.3988e-08
	CRTAP	1368.75	-0.428543	0.0710169	-6.03438	1.59578e-09	2.40541e-08
	HMHA1	1117.32	-0.475177	0.0788112	-6.02931	1.64665e-09	2.47941e-08
	TENC1	309.448	-0.794657	0.131871	-6.02602	1.68042e-09	2.52753e-08
	SMARCC2	2823.14	-0.312398	0.0519125	-6.01778	1.76823e-09	2.65674e-08
	NONO	15440.8	-0.18177	0.0302085	-6.01719	1.77467e-09	2.66067e-08
	WWC1	2032.56	-0.357701	0.0594463	-6.01722	1.77439e-09	2.66067e-08
	RARG	736.135	-0.572597	0.0951653	-6.01686	1.77829e-09	2.66323e-08
	SUGP2	2095.37	0.378457	0.0629114	6.01572	1.79094e-09	2.6792e-08
	MT-ATP6	40509	0.178451	0.0296649	6.01555	1.7928e-09	2.6792e-08
	OTUB2	391.481	0.75216	0.125064	6.01418	1.808e-09	2.69902e-08
	SPRY4	135.117	1.05945	0.176189	6.01317	1.81933e-09	2.71302e-08
	ITGB4	677.204	-0.57813	0.0962604	-6.0059	1.90275e-09	2.83438e-08
	NINL	436.354	-0.695406	0.115905	-5.99978	1.97588e-09	2.94017e-08
	EIF3E	10532.7	-0.210781	0.0351505	-5.99652	2.01588e-09	2.9965e-08
	SDCBP	2130.18	0.35257	0.0588759	5.98836	2.11973e-09	3.14751e-08
	NHSL1	1962.09	-0.366047	0.0611311	-5.98791	2.12557e-09	3.15282e-08
	PXDC1	486.392	-0.666295	0.111305	-5.98623	2.14758e-09	3.18208e-08
	GABARAPL1	1150.69	0.471728	0.0789676	5.97369	2.31943e-09	3.43305e-08
	ZNF185	565.533	-0.62798	0.10514	-5.97281	2.33197e-09	3.44794e-08
	TERF2IP	1026.68	0.488893	0.0819781	5.9637	2.46584e-09	3.64202e-08
	PITHD1	1208.79	0.44933	0.0753738	5.96135	2.50156e-09	3.69086e-08
	AHRR	51.0286	1.24922	0.209882	5.95202	2.64847e-09	3.90348e-08
	NOTCH1	10105.8	-0.201822	0.0339104	-5.95165	2.65457e-09	3.90833e-08
	PHF6	1833.26	-0.391359	0.0657973	-5.94796	2.71513e-09	3.99328e-08
	NAPRT1	2891.73	-0.313533	0.0527244	-5.94664	2.73694e-09	4.01688e-08
	RPLP1	20269	-0.19697	0.033122	-5.94681	2.7342e-09	4.01688e-08
	HSD17B10	3920.22	0.277546	0.0466743	5.94645	2.74018e-09	4.01739e-08
	CLDN7	5327.6	-0.243915	0.0411162	-5.93235	2.98631e-09	4.37364e-08
	CKAP4	1359.24	-0.422079	0.0711552	-5.9318	2.99633e-09	4.38371e-08
	SRSF3	7939.87	-0.220412	0.0371603	-5.93138	3.004e-09	4.39031e-08
	ARHGEF19	1710.34	-0.379671	0.0640379	-5.92885	3.05072e-09	4.45392e-08
	SLC31A1	1693.33	0.442143	0.0745865	5.92792	3.06805e-09	4.47329e-08
	DCHS2	143.906	1.02645	0.173158	5.92779	3.07041e-09	4.47329e-08
	IL6ST	861.444	0.512665	0.0865184	5.9255	3.11348e-09	4.5313e-08
	ACKR2	921.981	-0.5208	0.0879675	-5.92037	3.21225e-09	4.66752e-08
	SLIT3	448.686	-0.71771	0.121229	-5.92029	3.21378e-09	4.66752e-08
	DEPTOR	218.027	-0.891304	0.150695	-5.91462	3.32649e-09	4.82619e-08
	LDHB	10822.4	-0.21572	0.0364928	-5.91131	3.39391e-09	4.91888e-08
	TNFSF15	160.875	0.995128	0.16853	5.90474	3.53197e-09	5.11364e-08
	FOXK1	6399.52	-0.229333	0.0388546	-5.90235	3.58367e-09	5.18311e-08
	FAM111B	1666.64	-0.38382	0.0650579	-5.89967	3.64234e-09	5.2625e-08
	PRICKLE2	373.386	0.734708	0.124615	5.89583	3.728e-09	5.38069e-08
	ALMS1	1374.15	-0.415419	0.0704806	-5.8941	3.76737e-09	5.43188e-08
	MDFIC	391.802	-0.709548	0.120426	-5.89201	3.81533e-09	5.48399e-08
	PRKAR2B	484.607	-0.658477	0.111756	-5.89212	3.81276e-09	5.48399e-08
	EIF5	6057.92	0.232192	0.039406	5.8923	3.80851e-09	5.48399e-08
	CPSF1	6027.24	-0.236074	0.0401132	-5.8852	3.97585e-09	5.70295e-08
	TPPP	239.115	0.863348	0.146697	5.88523	3.975e-09	5.70295e-08
	PER1	288.727	0.802192	0.136445	5.87925	4.12123e-09	5.90539e-08
	RAN	8710.85	-0.201887	0.0343402	-5.87903	4.12673e-09	5.9072e-08
	ST3GAL4	939.382	0.495684	0.0844457	5.86985	4.36185e-09	6.23736e-08
	HNRNPR	6669.55	-0.231349	0.0394787	-5.86011	4.6255e-09	6.60758e-08
	PAWR	1605.81	-0.399325	0.0682615	-5.84993	4.91784e-09	7.018e-08
	FLAD1	2944.4	0.299705	0.0512376	5.84932	4.936e-09	7.0367e-08
	FOXO6	221.908	-0.880377	0.150726	-5.84091	5.19177e-09	7.39376e-08
	IL6R	522.684	0.624091	0.106979	5.83379	5.41826e-09	7.70843e-08
	HIVEP2	289.144	0.833428	0.142902	5.83217	5.47113e-09	7.7757e-08
	DOCK1	1682.47	-0.379095	0.0650235	-5.83012	5.5388e-09	7.86385e-08
	DNMT1	6332.13	-0.225884	0.0387523	-5.82894	5.57822e-09	7.91176e-08
	CDCA4	1429.43	-0.410144	0.0704497	-5.8218	5.82167e-09	8.24309e-08
	CPEB4	439.743	0.669187	0.114946	5.82174	5.82366e-09	8.24309e-08
	RPS27	12435.3	-0.182932	0.031439	-5.81864	5.93277e-09	8.38899e-08
	RPL35	9598.05	-0.204996	0.0352684	-5.81245	6.15658e-09	8.69664e-08
	SUCLG2	1288.42	-0.469101	0.0807136	-5.81193	6.17577e-09	8.7149e-08
	GCC1	818.67	0.519469	0.0893935	5.81104	6.20877e-09	8.7526e-08
	SLC20A1	2428.1	0.324091	0.0558105	5.807	6.36031e-09	8.95717e-08
	RIF1	3777.55	-0.270792	0.0467045	-5.79798	6.71176e-09	9.44256e-08
	WDR47	1170.24	0.449664	0.0775917	5.79526	6.82147e-09	9.58723e-08
	MT1X	443.371	-1.01573	0.175491	-5.78795	7.12524e-09	1.00041e-07
	TMEM123	17000.1	-0.172755	0.0298485	-5.78774	7.13396e-09	1.00062e-07
	GPCPD1	469.946	0.658871	0.113869	5.78623	7.19829e-09	1.00863e-07
	C1orf63	677.897	0.554334	0.0958321	5.78443	7.276e-09	1.01849e-07
	LPHN2	2053.92	-0.38222	0.0661183	-5.78085	7.43226e-09	1.03875e-07
	CFD	76.6254	-1.16566	0.201643	-5.78078	7.43563e-09	1.03875e-07
	FANCC	698.416	-0.548595	0.0949143	-5.7799	7.4747e-09	1.04316e-07
	MAPK13	550.551	-0.612122	0.105935	-5.77827	7.54717e-09	1.05222e-07
	NDRG1	1969.65	0.348473	0.0604226	5.76725	8.05735e-09	1.12223e-07
	MSI2	1294.91	-0.415532	0.0721354	-5.76044	8.38936e-09	1.1673e-07
	POLR2G	1970	0.347322	0.0603129	5.75866	8.47854e-09	1.17853e-07
	DEFB1	177.574	-0.933875	0.162249	-5.75581	8.62273e-09	1.19738e-07
	CHD5	28.2604	1.18606	0.206082	5.75528	8.64991e-09	1.19996e-07
	BMP6	3509.68	-0.276664	0.0481098	-5.75068	8.88831e-09	1.23058e-07
	MYH14	6206.22	-0.241115	0.041927	-5.75083	8.88044e-09	1.23058e-07
	MAP3K11	2094.69	0.342578	0.0596688	5.74133	9.39333e-09	1.29921e-07
	NEURL1B	488.434	-0.653002	0.113947	-5.73077	9.99744e-09	1.38139e-07
	STMN1	23685.3	-0.158637	0.0276973	-5.72753	1.01902e-08	1.40663e-07
	PKP3	3403.99	-0.284173	0.0497159	-5.71593	1.09104e-08	1.50455e-07
	GSDMD	1483.3	-0.39798	0.0696556	-5.71354	1.10651e-08	1.52437e-07
	RNF40	2603.81	0.306062	0.0536285	5.70707	1.14936e-08	1.58185e-07
	FAM162A	999.442	0.468359	0.0820775	5.7063	1.15456e-08	1.58744e-07
	B3GAT3	1172.01	0.432741	0.0759225	5.69977	1.19967e-08	1.64784e-07
	PDE7A	1118.49	-0.437319	0.0767575	-5.69741	1.21641e-08	1.66918e-07
	MTO1	1505.85	0.392869	0.0689732	5.69597	1.22671e-08	1.68165e-07
	DDR2	137.979	1.00099	0.175851	5.69227	1.25358e-08	1.7168e-07
	ATP5G2	1905.23	-0.352596	0.0619609	-5.69061	1.26584e-08	1.73189e-07
	TMPRSS13	278.051	-0.790632	0.139112	-5.68342	1.3203e-08	1.80462e-07
	SCAF11	2363.01	-0.322717	0.0567853	-5.68311	1.32264e-08	1.80605e-07
	WDR62	1294.58	0.451395	0.0795064	5.67747	1.36704e-08	1.86485e-07
	SOCS2	83.9502	1.12324	0.197903	5.67571	1.38117e-08	1.88228e-07
	RPS2	36712.6	-0.173528	0.0305833	-5.67395	1.39539e-08	1.8998e-07
	VMA21	1680.99	-0.382158	0.0673718	-5.67238	1.40828e-08	1.91549e-07
	BMP8B	1178.22	-0.432636	0.0763151	-5.66907	1.43577e-08	1.95097e-07
	COL16A1	102.059	1.10263	0.19453	5.66819	1.44312e-08	1.95904e-07
	FXYD3	2134.82	-0.343559	0.0606267	-5.66678	1.45503e-08	1.97329e-07
	IGF2R	4614.03	-0.251799	0.0444431	-5.66565	1.46471e-08	1.98448e-07
	ATXN7L3B	2996.95	-0.309363	0.0546063	-5.66535	1.46726e-08	1.98601e-07
	SP100	269.014	-0.800693	0.141362	-5.66414	1.47762e-08	1.99808e-07
	PRKCSH	5684.98	-0.233325	0.0411954	-5.66385	1.48016e-08	1.99958e-07
	PIK3AP1	151.583	0.969637	0.171242	5.66239	1.49277e-08	2.01467e-07
	SEPT2	6651.22	-0.214025	0.0378003	-5.662	1.4962e-08	2.01733e-07
	CACHD1	563.531	-0.587392	0.103878	-5.65466	1.56156e-08	2.10343e-07
	METTL5	3591.53	0.268636	0.0475089	5.65443	1.5636e-08	2.10414e-07
	PRPF4	1855.08	0.366242	0.0649754	5.63663	1.73408e-08	2.3313e-07
	PRPF6	3116.75	0.284487	0.050478	5.63586	1.7419e-08	2.33956e-07
	EIF2AK1	12362.6	-0.182533	0.0323896	-5.63555	1.74504e-08	2.34151e-07
	RPS19BP1	872.443	0.500362	0.0888059	5.63433	1.75739e-08	2.35582e-07
	TP53BP2	5020.39	-0.237541	0.0421926	-5.62991	1.80303e-08	2.41468e-07
	PHGDH	47441.1	0.140991	0.0250478	5.62888	1.81388e-08	2.42687e-07
	CCNG1	1088.28	0.44866	0.0797214	5.62785	1.8247e-08	2.43901e-07
	ZP3	628.583	0.558885	0.0994008	5.62254	1.8817e-08	2.51279e-07
	TRRAP	2776.51	-0.307991	0.0548161	-5.61863	1.92481e-08	2.56789e-07
	SMO	659.897	-0.562355	0.100099	-5.61797	1.93216e-08	2.57523e-07
	SCUBE3	39.3076	-1.18076	0.210248	-5.61601	1.95421e-08	2.60213e-07
	CAMK1D	1436.65	-0.392581	0.0699283	-5.61405	1.97646e-08	2.62924e-07
	AOC2	55.6061	1.16688	0.208053	5.60859	2.03985e-08	2.71097e-07
	DUSP5	178.551	0.908922	0.162075	5.60805	2.04625e-08	2.71689e-07
	POU2F1	1159.1	-0.428996	0.0765061	-5.60734	2.05463e-08	2.72404e-07
	ZFHX4	1260.33	-0.422175	0.0752907	-5.60726	2.05555e-08	2.72404e-07
	PPP1R15B	3337.72	0.274064	0.0488841	5.6064	2.06576e-08	2.73497e-07
	TAF15	5326.97	-0.26966	0.048106	-5.60553	2.07622e-08	2.74621e-07
	GEM	76.3741	1.12103	0.200055	5.60358	2.09967e-08	2.77291e-07
	MAP4	11082.7	-0.187071	0.0333846	-5.60352	2.10039e-08	2.77291e-07
	CDK19	1472.72	-0.38147	0.0681126	-5.60058	2.13636e-08	2.81773e-07
	RPS6KA3	1738.43	-0.365145	0.0652034	-5.60009	2.14235e-08	2.82296e-07
	PIM1	1069.31	-0.445382	0.0795604	-5.59803	2.16795e-08	2.85399e-07
	CTDSP1	1520.06	-0.378857	0.0677673	-5.59057	2.26332e-08	2.97672e-07
	NEU1	880.311	0.47761	0.0855085	5.58552	2.33004e-08	3.06159e-07
	ATP6V1A	2909.92	0.299266	0.0536619	5.57688	2.44873e-08	3.21451e-07
	MED13L	3550	-0.272877	0.0489386	-5.5759	2.46248e-08	3.22952e-07
	ARHGDIB	2394.46	-0.314577	0.056458	-5.57187	2.52018e-08	3.30208e-07
	FAM213B	602.611	-0.561346	0.100752	-5.57155	2.52476e-08	3.30497e-07
	TMBIM1	3654.17	-0.276794	0.0496928	-5.5701	2.54592e-08	3.32954e-07
	CALM3	6546.05	-0.234377	0.0420852	-5.56911	2.56045e-08	3.3454e-07
	EML2	844.305	0.510754	0.0917434	5.5672	2.58863e-08	3.37905e-07
	DSP	31752.3	-0.15346	0.0275765	-5.56487	2.62354e-08	3.42141e-07
	AMER1	1281.06	-0.409386	0.0735709	-5.5645	2.62902e-08	3.42535e-07
	SPAG9	2726.24	0.294127	0.0528598	5.56429	2.63221e-08	3.42631e-07
	NFKBIZ	367.507	0.694042	0.124867	5.55824	2.72515e-08	3.54396e-07
	TUBB6	6893.49	-0.206562	0.037217	-5.5502	2.85336e-08	3.70724e-07
	YWHAQ	16285.7	-0.17148	0.0309062	-5.5484	2.88302e-08	3.7388e-07
	ACTB	123483	-0.12412	0.0223701	-5.54847	2.88177e-08	3.7388e-07
	EP400	2240.34	-0.343675	0.0619465	-5.54793	2.89072e-08	3.7453e-07
	PTPRR	261.293	0.781388	0.141051	5.53977	3.02877e-08	3.92051e-07
	OPLAH	2621.27	-0.306674	0.0553808	-5.53756	3.06722e-08	3.9666e-07
	HBS1L	8791.79	0.208008	0.0375709	5.5364	3.08756e-08	3.9892e-07
	SMC1A	11036	-0.177431	0.0320558	-5.53507	3.11107e-08	4.01585e-07
	CAV1	874.222	0.480689	0.0868963	5.53175	3.17044e-08	4.0887e-07
	COBL	2409.6	-0.327536	0.0592502	-5.52801	3.23876e-08	4.17294e-07
	ZNF146	6363.48	0.215156	0.0389328	5.52632	3.27008e-08	4.2094e-07
	SIGIRR	1127.74	-0.422401	0.0764929	-5.5221	3.3498e-08	4.30804e-07
	SAMD4B	5262.41	0.241803	0.043794	5.52139	3.36336e-08	4.32149e-07
	UBL3	1860.46	0.341335	0.061827	5.5208	3.37451e-08	4.33182e-07
	PRMT5	2561.95	0.299566	0.0542905	5.51783	3.43214e-08	4.40173e-07
	NACC2	701.998	-0.529318	0.0959582	-5.51613	3.46543e-08	4.44034e-07
	TLE3	952.258	0.502152	0.0910805	5.51328	3.52202e-08	4.50747e-07
	GCAT	396.656	0.662215	0.120115	5.51317	3.52429e-08	4.50747e-07
	C9orf69	1910.4	-0.346396	0.0628879	-5.50815	3.62626e-08	4.63363e-07
	PHF8	2011.63	0.333254	0.0606445	5.49521	3.90239e-08	4.9819e-07
	PGM2L1	837.989	0.490808	0.0893193	5.49499	3.90737e-08	4.98369e-07
	TMC4	732.074	-0.506269	0.0921508	-5.49392	3.93116e-08	5.00945e-07
	AURKA	2161.85	0.329495	0.0599937	5.49215	3.97071e-08	5.05521e-07
	DYNLT3	796.924	0.5053	0.0920586	5.4889	4.04454e-08	5.14451e-07
	FAM126A	1062.52	0.453148	0.0825708	5.488	4.06516e-08	5.16601e-07
	TAX1BP1	3845.57	0.268468	0.0489374	5.48595	4.11256e-08	5.2215e-07
	ZNF251	827.487	0.486734	0.0887376	5.48509	4.13251e-08	5.24204e-07
	CREB5	84.4145	1.09879	0.20037	5.48383	4.16219e-08	5.27489e-07
	CELSR1	1426.16	-0.393795	0.0718319	-5.48217	4.20147e-08	5.31982e-07
	DKK3	478.079	0.608752	0.111161	5.47632	4.34258e-08	5.49351e-07
	SRPRB	2425.17	0.312503	0.0571319	5.46985	4.50407e-08	5.69262e-07
	GOT1	984.009	0.468656	0.0856835	5.46961	4.51017e-08	5.69517e-07
	MFSD12	2704.91	0.289795	0.0529855	5.46932	4.51757e-08	5.69934e-07
	ANLN	11609.2	-0.177645	0.0324833	-5.46883	4.53026e-08	5.71018e-07
	SFXN2	455.193	-0.62007	0.113422	-5.46693	4.57898e-08	5.76637e-07
	BAMBI	1121.31	0.43253	0.0791252	5.4664	4.59263e-08	5.77833e-07
	FKBP5	1946.85	-0.345491	0.063214	-5.46542	4.61811e-08	5.80515e-07
	TMSB4X	8279.19	0.217802	0.0398612	5.464	4.6552e-08	5.8465e-07
	ZMYM3	2193.23	-0.31678	0.0580222	-5.45964	4.77091e-08	5.98642e-07
	PDZD2	4711.93	-0.233574	0.0428155	-5.45537	4.88706e-08	6.12664e-07
	ASAP1	1780.34	-0.354002	0.0649149	-5.45333	4.94351e-08	6.19183e-07
	RNF19A	1927.69	0.352358	0.0646502	5.45023	5.03056e-08	6.29521e-07
	DPY19L4	1469.68	-0.400336	0.0734815	-5.44812	5.09041e-08	6.35298e-07
	EVC	158.07	-0.916404	0.168199	-5.44833	5.08461e-08	6.35298e-07
	B9D1	251.283	-0.788574	0.14474	-5.44819	5.08838e-08	6.35298e-07
	DAP	2523.68	0.29678	0.0544805	5.44746	5.10948e-08	6.37107e-07
	SZT2	3510.65	-0.280009	0.0514149	-5.44607	5.1496e-08	6.41535e-07
	IL17RB	848.512	-0.473573	0.0869849	-5.44432	5.20048e-08	6.47295e-07
	FUBP1	3595.58	-0.260354	0.0478244	-5.44397	5.21061e-08	6.47976e-07
	TAF13	685.185	0.521579	0.0958704	5.44046	5.31443e-08	6.60297e-07
	FRAS1	1485.87	-0.377268	0.0693661	-5.43879	5.36449e-08	6.65924e-07
	SLFN5	1105.88	0.42301	0.0777849	5.4382	5.38201e-08	6.67503e-07
	RABGAP1L	1324.33	0.392554	0.0721993	5.43709	5.41582e-08	6.71099e-07
	PLEKHB2	5091.68	0.235992	0.0435099	5.42387	5.83221e-08	7.22054e-07
	POLE	3049.87	-0.276508	0.051066	-5.41473	6.13817e-08	7.59258e-07
	AMOTL1	427.681	-0.635012	0.117374	-5.41018	6.29607e-08	7.78098e-07
	TTC7A	1835.13	-0.348835	0.0645068	-5.40772	6.38314e-08	7.8816e-07
	DNMT3A	758.349	-0.495288	0.0916033	-5.40687	6.4134e-08	7.91194e-07
	LARP1	12100.3	-0.188781	0.0349233	-5.40561	6.4589e-08	7.96102e-07
	ADORA1	165.366	-0.889598	0.164726	-5.40047	6.64651e-08	8.18502e-07
	GBA	2410.57	0.305379	0.0565996	5.39542	6.83645e-08	8.41149e-07
	MMP14	2677.41	-0.28791	0.0533688	-5.39471	6.86334e-08	8.43712e-07
	FAM114A1	1717.67	-0.358414	0.0664676	-5.39231	6.9559e-08	8.54337e-07
	CNOT11	3147.27	-0.269253	0.049938	-5.39175	6.97748e-08	8.56232e-07
	SOGA2	1205.4	-0.419067	0.0777301	-5.39131	6.99463e-08	8.5758e-07
	SORT1	3850.71	-0.27585	0.0511706	-5.3908	7.01465e-08	8.59279e-07
	PCBP2	7599.93	-0.211674	0.0393302	-5.38198	7.36719e-08	9.01672e-07
	FAU	6739.58	0.205124	0.03813	5.37959	7.46565e-08	9.12919e-07
	MYEOV	2330.54	-0.315738	0.0586956	-5.37925	7.47971e-08	9.13837e-07
	EFNA3	744.229	-0.495451	0.0921683	-5.37551	7.63679e-08	9.3221e-07
	CHRAC1	1874.51	-0.330843	0.0616742	-5.36437	8.12334e-08	9.90734e-07
	PI4K2B	999.982	-0.435429	0.0811829	-5.36355	8.16006e-08	9.94343e-07
	RAI1	3683.82	-0.25296	0.0471817	-5.36142	8.25722e-08	1.0053e-06
	TRIM16L	299.505	0.730674	0.136347	5.35895	8.37077e-08	1.01824e-06
	RPL8	62186.7	-0.137926	0.0257409	-5.35825	8.40304e-08	1.02038e-06
	KPNA2	5815.68	-0.212048	0.0395735	-5.35834	8.39923e-08	1.02038e-06
	TMX2	1100.4	0.435397	0.0812789	5.35683	8.46943e-08	1.02755e-06
	SBDS	2158.75	0.318596	0.0594958	5.35493	8.55882e-08	1.03749e-06
	C15orf38	284.559	-0.72927	0.136289	-5.35093	8.75049e-08	1.0598e-06
	ASXL1	4443.89	-0.24291	0.0454145	-5.34874	8.85669e-08	1.07173e-06
	WHSC1	3775.36	-0.24703	0.0461915	-5.34796	8.89514e-08	1.07545e-06
	AES	5626.36	-0.224736	0.0420256	-5.34761	8.91214e-08	1.07616e-06
	PPP1R14B	2846.79	0.281033	0.0525539	5.34753	8.91648e-08	1.07616e-06
	SLC41A3	1395.5	-0.37621	0.0703667	-5.34641	8.97149e-08	1.08186e-06
	SPC25	426.185	-0.648603	0.121426	-5.34154	9.21616e-08	1.1104e-06
	PPFIA1	4035.2	0.240724	0.0450807	5.33986	9.30202e-08	1.11978e-06
	PTPRJ	1628.24	0.364987	0.0683566	5.33946	9.32242e-08	1.12127e-06
	SYT12	2655.77	0.296408	0.0555262	5.33817	9.38874e-08	1.12827e-06
	GTF3A	8667.43	0.194027	0.0363686	5.33501	9.55377e-08	1.14711e-06
	NOV	305.205	0.731409	0.137156	5.33268	9.67736e-08	1.16095e-06
	ARHGEF25	282.197	-0.750418	0.140745	-5.33177	9.72603e-08	1.16578e-06
	TMEM98	255.361	-0.756894	0.142005	-5.33007	9.81753e-08	1.17574e-06
	CNTNAP1	103.784	1.00612	0.188904	5.32611	1.0034e-07	1.20064e-06
	PCSK1N	571.75	0.547899	0.102944	5.3223	1.02461e-07	1.22496e-06
	GSR	1362.63	-0.379467	0.0713041	-5.32181	1.0274e-07	1.22725e-06
	POLA1	1213.68	-0.396079	0.0744346	-5.32117	1.03104e-07	1.23053e-06
	CCDC86	2246.55	0.308579	0.0580361	5.31702	1.05483e-07	1.25784e-06
	RRM1	4881.35	-0.223667	0.0420711	-5.3164	1.05842e-07	1.26105e-06
	BHLHE40	951.919	0.439849	0.0827625	5.31459	1.06896e-07	1.27252e-06
	PXDN	6785.37	0.207966	0.0391376	5.31372	1.07412e-07	1.27758e-06
	CTD-3193O13.9	326.679	-0.692089	0.130336	-5.31003	1.09605e-07	1.30254e-06
	DUSP8	733.783	0.494849	0.0932544	5.30645	1.11783e-07	1.32729e-06
	SYNPO	361.292	-0.67311	0.126875	-5.30531	1.1248e-07	1.33443e-06
	MYO1E	1249.01	0.396347	0.074712	5.30499	1.12678e-07	1.33565e-06
	KCTD12	308.182	-0.706646	0.133238	-5.30366	1.13506e-07	1.34431e-06
	DDB2	340.709	-0.673231	0.126984	-5.3017	1.14727e-07	1.35761e-06
	EEF2K	1214.36	-0.393357	0.0743192	-5.29281	1.2045e-07	1.42413e-06
	NME4	2311.2	-0.309719	0.0585282	-5.29178	1.21131e-07	1.43096e-06
	FAM115A	418.612	-0.625967	0.118315	-5.2907	1.21848e-07	1.43821e-06
	PYGB	3569.24	0.256172	0.0484261	5.28997	1.22339e-07	1.44279e-06
	RASL10B	168.544	-0.872597	0.165064	-5.28643	1.24728e-07	1.46972e-06
	ATRX	2920.42	-0.278179	0.0526871	-5.27983	1.29302e-07	1.52233e-06
	CALR	26739.4	0.159274	0.0301841	5.27676	1.31487e-07	1.54675e-06
	MAN1A2	1658.28	-0.344789	0.0653597	-5.27526	1.3257e-07	1.55782e-06
	RPS24	13840	-0.188314	0.0356983	-5.27514	1.32651e-07	1.55782e-06
	FBXO5	557.049	-0.54725	0.10377	-5.27371	1.33695e-07	1.56875e-06
	CRIM1	5121.65	-0.217904	0.0413537	-5.26927	1.3697e-07	1.60582e-06
	ZNF641	1138.73	-0.403526	0.0766185	-5.26669	1.38905e-07	1.62714e-06
	SEPT9	6912.87	-0.197415	0.0374866	-5.26628	1.39214e-07	1.62939e-06
	KDM3B	3001.85	-0.271692	0.0516101	-5.26432	1.40711e-07	1.64553e-06
	TMEM165	2257.24	-0.320003	0.0608055	-5.26273	1.41934e-07	1.65843e-06
	RBFOX2	3078.95	-0.271077	0.0515193	-5.26167	1.42756e-07	1.66664e-06
	S100A13	2960.4	-0.268613	0.0511081	-5.25579	1.47387e-07	1.71927e-06
	CXCR4	42.8155	1.10509	0.210273	5.25548	1.47636e-07	1.72073e-06
	UPK3B	114.255	-0.964322	0.183533	-5.25422	1.48653e-07	1.73113e-06
	HERC2	2423.7	-0.311012	0.0592015	-5.25344	1.49281e-07	1.737e-06
	SPRED2	450.77	0.606856	0.115581	5.25046	1.51717e-07	1.76387e-06
	RP11-1055B8.7	1499.35	-0.361795	0.0689675	-5.24588	1.5554e-07	1.80681e-06
	CDCA7	1503.31	-0.360051	0.0687271	-5.23885	1.61579e-07	1.87539e-06
	KHDRBS1	5509.12	-0.210595	0.0402049	-5.23805	1.62284e-07	1.882e-06
	XPOT	8066.5	0.189983	0.0362729	5.2376	1.62681e-07	1.88504e-06
	MPDZ	1072.68	-0.411071	0.0784901	-5.23722	1.63009e-07	1.88728e-06
	RRM2B	656.794	0.508758	0.0971487	5.2369	1.63299e-07	1.88906e-06
	KIAA0754	1255.91	-0.389428	0.0743777	-5.23582	1.64253e-07	1.89852e-06
	NBR1	1783.72	0.333168	0.0636358	5.23554	1.64502e-07	1.89982e-06
	KIAA0513	193.213	0.832471	0.159034	5.23455	1.6539e-07	1.9085e-06
	PSMG3	1772.8	0.342369	0.0654246	5.23303	1.66758e-07	1.92269e-06
	TMEM64	1528.09	-0.357769	0.068397	-5.23078	1.688e-07	1.94463e-06
	UNC13D	699.336	-0.506493	0.0968911	-5.22745	1.71866e-07	1.97831e-06
	IDH3B	1905.78	0.32923	0.0629856	5.22707	1.72218e-07	1.98073e-06
	MYH10	1947.42	-0.320244	0.0612775	-5.22613	1.73095e-07	1.98917e-06
	SLIT2	232.538	-0.774954	0.148302	-5.22551	1.73672e-07	1.99414e-06
	SF3B3	6272.54	-0.211499	0.0404832	-5.22436	1.74762e-07	2.00501e-06
	GPAA1	6023.59	-0.216222	0.0413908	-5.22391	1.75183e-07	2.00819e-06
	ADM	36.3481	1.09612	0.209876	5.22272	1.76314e-07	2.01949e-06
	MTHFD2	7208	0.197659	0.0378767	5.21848	1.80398e-07	2.06457e-06
	HELLS	1052.65	-0.415933	0.0797457	-5.21574	1.83088e-07	2.09364e-06
	SEPT8	1504.63	-0.357295	0.0685348	-5.21334	1.85475e-07	2.11919e-06
	MCM3	3835.72	-0.239915	0.0460493	-5.20995	1.88891e-07	2.15646e-06
	RNASEH2C	832.856	0.464315	0.089133	5.20924	1.89616e-07	2.16296e-06
	SOCS3	72.2592	-1.04926	0.201436	-5.20891	1.89957e-07	2.16507e-06
	CPT2	1626	-0.343589	0.0659966	-5.20617	1.92778e-07	2.19543e-06
	ASPM	4754.53	-0.223836	0.0430792	-5.19592	2.03708e-07	2.31801e-06
	YKT6	3901.68	0.237776	0.0457705	5.19495	2.04773e-07	2.32822e-06
	ATXN10	2197.06	-0.303896	0.0585683	-5.18874	2.11718e-07	2.40327e-06
	TRIB1	2707.94	0.275367	0.0530689	5.18887	2.11575e-07	2.40327e-06
	ANAPC5	3873.81	-0.239731	0.046208	-5.18809	2.12467e-07	2.4098e-06
	BAD	697.081	0.497058	0.0958496	5.18581	2.15077e-07	2.43742e-06
	H2AFX	1407.06	-0.372554	0.0718781	-5.18314	2.18185e-07	2.47064e-06
	IPO7	8669.79	-0.182398	0.0352019	-5.18148	2.20131e-07	2.49065e-06
	SP110	102.319	-0.983702	0.1899	-5.18012	2.21749e-07	2.50691e-06
	HSPA13	992.97	0.425409	0.0821339	5.17945	2.22539e-07	2.5138e-06
	RERG	721.51	-0.502847	0.0970924	-5.17906	2.23012e-07	2.5171e-06
	LMAN1	1479.49	-0.364418	0.0703671	-5.17881	2.2331e-07	2.51843e-06
	SYNM	1231.31	0.386437	0.0746612	5.17588	2.26843e-07	2.55621e-06
	ESRP1	8699.18	-0.18311	0.0353945	-5.1734	2.29874e-07	2.58827e-06
	HNRNPF	10913.9	-0.177085	0.0342561	-5.16944	2.34794e-07	2.64153e-06
	DDX60L	220.443	-0.774293	0.149863	-5.16668	2.38285e-07	2.67864e-06
	LAMC1	3190.86	-0.26896	0.0520615	-5.16619	2.38909e-07	2.68349e-06
	AHCY	9313.32	-0.176954	0.0342775	-5.1624	2.438e-07	2.73622e-06
	TGOLN2	3942.67	-0.2465	0.0477697	-5.16019	2.46702e-07	2.76656e-06
	KDELC2	119.15	-0.939506	0.182157	-5.15768	2.50025e-07	2.80157e-06
	SLC35B2	1674.01	-0.337302	0.0654299	-5.15516	2.53414e-07	2.83726e-06
	CBR4	422.642	-0.628116	0.121875	-5.15379	2.55274e-07	2.85579e-06
	ARHGEF11	1711.35	-0.330471	0.0641503	-5.15151	2.58391e-07	2.88834e-06
	ANP32E	9567.09	-0.179113	0.0347909	-5.14828	2.62882e-07	2.93618e-06
	SEMA4D	1049.29	-0.407616	0.0792013	-5.14658	2.6528e-07	2.96059e-06
	KIAA1598	1086.05	-0.413844	0.0804729	-5.14265	2.70895e-07	3.02084e-06
	USP46	1134.6	-0.40902	0.0795435	-5.1421	2.71691e-07	3.02729e-06
	RBM12	2644.74	-0.274638	0.0534181	-5.1413	2.72851e-07	3.03778e-06
	SLC25A25	902.793	0.447245	0.0870465	5.138	2.77675e-07	3.08902e-06
	ZNF598	2471.38	0.283725	0.0552615	5.13423	2.83304e-07	3.14913e-06
	PLEKHA4	823.996	-0.510913	0.0995359	-5.13295	2.85232e-07	3.16803e-06
	RRBP1	3053.5	-0.273977	0.0533779	-5.13278	2.85494e-07	3.16842e-06
	CALU	11368.6	-0.17741	0.0345686	-5.13211	2.86517e-07	3.17723e-06
	PCSK6	486.66	-0.568929	0.110891	-5.13053	2.88921e-07	3.20134e-06
	KANK1	2171.72	-0.303771	0.0592159	-5.12989	2.89912e-07	3.20978e-06
	ODF2	3025.87	0.264853	0.0516537	5.12747	2.93664e-07	3.24873e-06
	ZNF274	604.527	0.518319	0.101145	5.12449	2.9834e-07	3.29784e-06
	GCLM	1564.26	0.351749	0.0686566	5.12331	3.00218e-07	3.31596e-06
	GNG7	240.681	0.743125	0.145221	5.1172	3.10112e-07	3.42254e-06
	ANKRD10	1019.7	0.412717	0.0806783	5.11559	3.12764e-07	3.44908e-06
	DAGLB	1449.7	0.355154	0.0694368	5.11479	3.14091e-07	3.46097e-06
	ARHGEF3	457.267	-0.576526	0.11274	-5.11377	3.15796e-07	3.47701e-06
	MAFK	3183.01	0.259974	0.0508622	5.11135	3.19869e-07	3.51907e-06
	BACH2	153.915	-0.86137	0.168545	-5.11063	3.21093e-07	3.52974e-06
	YRDC	737.381	0.481156	0.0941515	5.11045	3.21392e-07	3.53024e-06
	IL17RD	1071.29	-0.425499	0.0833021	-5.10791	3.25746e-07	3.57525e-06
	TRMT1	2972.8	0.264875	0.0518586	5.10763	3.26224e-07	3.57767e-06
	ECE1	3495.63	-0.243995	0.047779	-5.10673	3.27784e-07	3.59195e-06
	WLS	552.433	-0.535123	0.104837	-5.10432	3.31987e-07	3.6323e-06
	TNFAIP1	1851.51	0.327903	0.0642388	5.10443	3.31786e-07	3.6323e-06
	ARL6IP4	1467.21	-0.349272	0.0684293	-5.10413	3.32325e-07	3.63314e-06
	PABPC4	16937.8	-0.150713	0.0295372	-5.10247	3.35241e-07	3.65927e-06
	MAP4K4	3446.97	0.248276	0.0486574	5.10253	3.35146e-07	3.65927e-06
	SIN3A	2334.29	-0.286062	0.0561015	-5.09901	3.41441e-07	3.72404e-06
	CLK3	945.335	0.424351	0.0832604	5.09666	3.4569e-07	3.76742e-06
	C19orf48	2989.69	-0.276356	0.0542354	-5.09548	3.47854e-07	3.78805e-06
	BCL2L2	692.857	-0.48656	0.0955423	-5.09261	3.53163e-07	3.84285e-06
	ATF6B	1599.44	-0.33979	0.0667497	-5.09051	3.57108e-07	3.88275e-06
	ZNF207	6203.76	-0.198067	0.0389331	-5.08738	3.63053e-07	3.94431e-06
	TMSB10	15299.2	-0.162693	0.0319827	-5.08691	3.6395e-07	3.95097e-06
	GPR125	919.284	-0.443392	0.08717	-5.08652	3.64694e-07	3.95596e-06
	KIAA0101	724.504	-0.484204	0.0952295	-5.0846	3.68393e-07	3.99298e-06
	RAB30	385.258	0.631726	0.124258	5.084	3.69576e-07	4.00268e-06
	EML3	1153.66	-0.390276	0.0767983	-5.08183	3.73815e-07	4.04272e-06
	ESPL1	1466.07	-0.368458	0.0725052	-5.08181	3.73852e-07	4.04272e-06
	LDLR	3447.26	-0.253373	0.0499024	-5.07736	3.82708e-07	4.13526e-06
	SERPINE2	204.119	0.780235	0.153887	5.07018	3.97444e-07	4.29116e-06
	DPP7	1786.18	-0.335028	0.0660871	-5.06949	3.98884e-07	4.30005e-06
	PSMD4	6830.77	0.189346	0.03735	5.06951	3.98832e-07	4.30005e-06
	TGM1	417.752	-0.595554	0.11749	-5.06896	4.00005e-07	4.30879e-06
	ZWINT	1316.5	-0.37383	0.0737543	-5.06859	4.00783e-07	4.31384e-06
	SNX18	1324.16	-0.361915	0.0714062	-5.0684	4.01176e-07	4.31473e-06
	ATP11A	2443.47	-0.291192	0.0574817	-5.06582	4.06641e-07	4.36677e-06
	FUT1	353.701	0.647317	0.127778	5.06596	4.06345e-07	4.36677e-06
	APLP2	8124.9	-0.19313	0.0381271	-5.06542	4.07497e-07	4.37258e-06
	PMAIP1	280.47	0.696969	0.137681	5.06219	4.14476e-07	4.44405e-06
	KNTC1	1366.08	-0.355784	0.0703219	-5.05936	4.20665e-07	4.50694e-06
	ACTN1	6467.96	-0.195336	0.038625	-5.05724	4.25365e-07	4.55379e-06
	SUSD3	136.859	-0.896834	0.177374	-5.05618	4.27739e-07	4.57569e-06
	FAM120A	7195.29	-0.186763	0.0369392	-5.05596	4.28226e-07	4.57738e-06
	TAF1D	954.366	0.417758	0.0826591	5.05399	4.32668e-07	4.62132e-06
	EPS8L1	333.189	-0.651814	0.129054	-5.05072	4.40139e-07	4.69751e-06
	C11orf82	1179.55	0.389051	0.0771196	5.04478	4.54042e-07	4.84219e-06
	NFE2L2	2550.36	0.280352	0.0556103	5.04137	4.62216e-07	4.92559e-06
	MTA3	1052.18	-0.396659	0.0786971	-5.04032	4.64744e-07	4.94874e-06
	WWC2	1488.75	-0.341411	0.0677557	-5.03886	4.68319e-07	4.983e-06
	NUDT5	2388.34	-0.283809	0.0563363	-5.03777	4.70988e-07	5.00375e-06
	C1RL	340.661	-0.669126	0.13282	-5.03786	4.70778e-07	5.00375e-06
	BIRC2	1359.53	0.360926	0.0716534	5.03711	4.7261e-07	5.01715e-06
	PCTP	958.647	-0.422739	0.0839891	-5.03326	4.82208e-07	5.11515e-06
	CHST14	297.859	-0.676749	0.134491	-5.03193	4.85567e-07	5.14686e-06
	TOMM40L	872.217	0.432998	0.0860635	5.03114	4.87561e-07	5.16406e-06
	OGT	4832.45	-0.215204	0.0427789	-5.03061	4.88923e-07	5.17456e-06
	UNC5C	78.8361	-0.995705	0.198023	-5.02823	4.9503e-07	5.23522e-06
	MBD3	2808.96	-0.262167	0.0521504	-5.02712	4.97888e-07	5.26145e-06
	PDXK	3192.72	-0.254134	0.050565	-5.02589	5.01103e-07	5.29141e-06
	ABCF1	3072.25	0.252184	0.0501818	5.02541	5.02353e-07	5.30058e-06
	H2AFY2	1407.85	-0.352533	0.0701952	-5.02218	5.10895e-07	5.38664e-06
	SAMD12	935.33	0.42527	0.0846881	5.0216	5.12439e-07	5.39883e-06
	ACTR1A	2915.93	0.263378	0.0525247	5.01436	5.32114e-07	5.60188e-06
	TARBP1	1777.88	-0.318928	0.0636527	-5.01043	5.43074e-07	5.71295e-06
	MPZL2	347.792	-0.640217	0.127824	-5.00857	5.48358e-07	5.76291e-06
	RFK	1274.89	0.3671	0.0732959	5.00847	5.48652e-07	5.76291e-06
	FOXC1	1432.86	-0.361255	0.0721389	-5.00777	5.50634e-07	5.77937e-06
	CDK2	1454.43	-0.361413	0.0721898	-5.00643	5.54499e-07	5.81556e-06
	ASIC1	414.131	-0.587625	0.117404	-5.00516	5.58163e-07	5.84958e-06
	RNF144B	1144.95	-0.39562	0.079059	-5.00412	5.61188e-07	5.87686e-06
	CIB2	346.882	-0.650201	0.129949	-5.0035	5.62974e-07	5.89114e-06
	ALDH18A1	5036.93	-0.215994	0.0431842	-5.00169	5.68287e-07	5.94227e-06
	CCNB1IP1	1041.93	0.39957	0.0799007	5.00083	5.70837e-07	5.96446e-06
	SPAG1	711.734	0.471398	0.0942779	5.00009	5.73038e-07	5.98297e-06
	RHBDF1	1350.57	-0.358997	0.0718894	-4.99374	5.9222e-07	6.1786e-06
	CGREF1	790.67	-0.44911	0.0899927	-4.99052	6.02181e-07	6.27782e-06
	FCGRT	256.126	-0.70621	0.14153	-4.98982	6.04355e-07	6.29578e-06
	ATP1B1	11490.1	-0.354876	0.0711248	-4.98948	6.05427e-07	6.30223e-06
	MTMR1	1408.77	-0.347503	0.0696501	-4.98926	6.06106e-07	6.30458e-06
	MYRF	567.865	-0.518829	0.103995	-4.98898	6.06979e-07	6.30896e-06
	RAPH1	1013.78	0.42799	0.0858125	4.9875	6.11652e-07	6.35279e-06
	SMAGP	604.873	-0.499438	0.100145	-4.98714	6.12795e-07	6.35991e-06
	ANO6	2002.31	-0.300403	0.0602428	-4.98654	6.1471e-07	6.37504e-06
	EIF2S3	4045.37	-0.229875	0.0461221	-4.98404	6.22691e-07	6.45301e-06
	SRD5A1	626.806	0.492115	0.0987418	4.98386	6.2329e-07	6.45441e-06
	CDC42	4885.03	-0.208276	0.0418101	-4.98148	6.31009e-07	6.52949e-06
	SECISBP2	1403.15	-0.352226	0.070724	-4.98029	6.34884e-07	6.5647e-06
	FKBP10	3512.87	-0.237288	0.0477095	-4.97361	6.5718e-07	6.79021e-06
	TMTC4	279.969	-0.688113	0.13845	-4.97012	6.6913e-07	6.90856e-06
	CCNF	1779.05	-0.32667	0.0657708	-4.96679	6.8071e-07	7.02291e-06
	CA5B	242.031	0.727573	0.146505	4.96619	6.82808e-07	7.03934e-06
	DPP9	2022.67	0.301561	0.0607418	4.96463	6.88306e-07	7.09077e-06
	SHANK3	816.77	-0.446896	0.0900934	-4.96037	7.03597e-07	7.24294e-06
	E2F2	2875.67	-0.255244	0.05152	-4.95427	7.26032e-07	7.46837e-06
	HES4	1608.62	-0.608957	0.122963	-4.95237	7.33165e-07	7.53617e-06
	RALGDS	2989.22	-0.260739	0.0527005	-4.94757	7.51453e-07	7.71846e-06
	KLHL5	3891.32	0.242426	0.0490187	4.94558	7.59176e-07	7.79204e-06
	SMC2	2591.35	-0.265504	0.0537235	-4.94205	7.73061e-07	7.92871e-06
	PTBP3	5572.21	-0.203432	0.0412281	-4.93431	8.04353e-07	8.24358e-06
	DMTN	478.519	-0.573938	0.11639	-4.93115	8.17455e-07	8.3717e-06
	ZMYM4	2145.03	-0.300074	0.0608689	-4.92985	8.22942e-07	8.4217e-06
	AKIRIN2	3493.82	0.24063	0.0488179	4.92913	8.25969e-07	8.44647e-06
	CS	5077.37	-0.204504	0.0415367	-4.92345	8.50321e-07	8.68912e-06
	SCNM1	1316.66	0.352545	0.0716134	4.92289	8.52744e-07	8.70749e-06
	GULP1	164.342	0.814059	0.165462	4.91992	8.65813e-07	8.83446e-06
	ZNF787	1670.89	-0.324625	0.0660067	-4.91805	8.74099e-07	8.91248e-06
	ARPC5	4037.5	-0.232736	0.0473833	-4.91177	9.02556e-07	9.19591e-06
	MLLT3	445.135	-0.562167	0.114469	-4.9111	9.05689e-07	9.22108e-06
	TOX2	306.439	-0.648024	0.132032	-4.90807	9.19773e-07	9.35763e-06
	TOR1B	1113.86	0.394287	0.0803421	4.9076	9.21978e-07	9.37322e-06
	SLC25A24	2480.28	-0.301065	0.061358	-4.90669	9.26247e-07	9.40975e-06
	DAPP1	260.73	0.697947	0.142293	4.90501	9.34248e-07	9.48411e-06
	ATG2B	928.625	0.408649	0.0833405	4.90336	9.42092e-07	9.55678e-06
	CXCL10	36.9397	1.02957	0.210017	4.90232	9.47135e-07	9.60094e-06
	PRICKLE1	299.594	-0.68186	0.139095	-4.90211	9.48129e-07	9.60403e-06
	AL626787.1	320.566	-0.645687	0.131724	-4.90181	9.49561e-07	9.61154e-06
	HSP90B1	10187.2	-0.177317	0.0361953	-4.89891	9.63701e-07	9.74759e-06
	KIAA0100	7515.75	-0.179799	0.0367062	-4.89832	9.66576e-07	9.76957e-06
	CEBPG	1845.83	0.30515	0.0623101	4.89729	9.71674e-07	9.81397e-06
	ROS1	62.7046	1.00983	0.206265	4.89576	9.79252e-07	9.88335e-06
	TMEM167B	1377.51	0.362927	0.0741536	4.89426	9.86783e-07	9.95215e-06
	ALDH7A1	1832.98	-0.309203	0.0632463	-4.88887	1.01414e-06	1.02207e-05
	CCNG2	1434.37	-0.341407	0.0698486	-4.88781	1.01962e-06	1.02684e-05
	SETD1B	1571.62	-0.327466	0.0670016	-4.88743	1.02162e-06	1.02812e-05
	PML	1600.97	-0.322322	0.0660253	-4.88179	1.05127e-06	1.0572e-05
	PHIP	2244.88	-0.280529	0.0574914	-4.87949	1.06363e-06	1.06884e-05
	IRX3	519.207	-0.523429	0.107283	-4.87894	1.06659e-06	1.07105e-05
	IBA57	524.816	-0.549212	0.112576	-4.87861	1.06838e-06	1.07207e-05
	MCM7	8057.08	-0.179245	0.036749	-4.87755	1.0741e-06	1.07664e-05
	TES	2824.85	0.252713	0.0518121	4.87748	1.07447e-06	1.07664e-05
	ADAMTS9	208.743	0.748502	0.153466	4.87733	1.07533e-06	1.07672e-05
	MAP3K1	790.686	-0.449339	0.092198	-4.87363	1.09567e-06	1.0963e-05
	MRPS21	2603.24	0.261445	0.0536551	4.8727	1.10084e-06	1.10068e-05
	PNPLA2	2187.33	-0.30364	0.0623415	-4.8706	1.11262e-06	1.11167e-05
	OSGIN1	127.481	0.88498	0.181956	4.86371	1.15208e-06	1.14944e-05
	MSL1	2060.43	-0.288396	0.0592948	-4.86376	1.15174e-06	1.14944e-05
	ITPA	1116.79	0.373733	0.0768502	4.86314	1.1554e-06	1.15192e-05
	SP3	2646.94	-0.259612	0.0534238	-4.85948	1.17697e-06	1.17259e-05
	GSN	2272.78	-0.297917	0.0613204	-4.85836	1.18359e-06	1.17835e-05
	MPC1	490.711	0.532295	0.109575	4.85781	1.18693e-06	1.18082e-05
	HR	1694.91	-0.313463	0.0645441	-4.85657	1.19438e-06	1.18739e-05
	CA2	298.88	0.661909	0.136316	4.85569	1.19968e-06	1.19181e-05
	ATP6V1B1	299.342	-0.662926	0.136545	-4.85501	1.2038e-06	1.19505e-05
	BGN	258.567	-0.690514	0.142341	-4.85112	1.22766e-06	1.21787e-05
	DDX49	1312.92	0.360447	0.0743292	4.84933	1.23877e-06	1.22802e-05
	SNRNP48	557.723	0.509001	0.104999	4.84769	1.24909e-06	1.23736e-05
	SIX5	730.203	-0.454408	0.0937686	-4.84605	1.25943e-06	1.24583e-05
	ZMIZ1	4725.01	-0.207469	0.0428108	-4.84619	1.25854e-06	1.24583e-05
	LRBA	2439.54	-0.28964	0.0597794	-4.84515	1.26518e-06	1.25064e-05
	DDX46	3631.01	-0.232783	0.0480512	-4.84448	1.26944e-06	1.25395e-05
	CCNE2	1213.03	-0.361403	0.0747055	-4.8377	1.31349e-06	1.29654e-05
	PYCR2	2087.06	-0.289799	0.0599174	-4.83663	1.32056e-06	1.30261e-05
	MEF2D	2094.76	0.291441	0.060281	4.83472	1.33335e-06	1.31429e-05
	BCAR3	503.021	0.523327	0.108299	4.83225	1.35001e-06	1.32977e-05
	HEYL	104.567	-0.90725	0.187775	-4.83158	1.35455e-06	1.33329e-05
	S1PR5	106.403	-0.899883	0.186397	-4.82779	1.38058e-06	1.35796e-05
	POLD2	3045.23	-0.256125	0.0530892	-4.82443	1.40404e-06	1.38006e-05
	CRY2	336.165	0.636353	0.132165	4.81482	1.47331e-06	1.44713e-05
	TMEM208	588.849	0.488592	0.101483	4.81454	1.47541e-06	1.44817e-05
	PCMT1	2051.17	0.288395	0.0599087	4.8139	1.48011e-06	1.45175e-05
	FNIP2	718.946	0.466089	0.0968435	4.81281	1.48823e-06	1.45869e-05
	BCL9	1168.52	-0.371664	0.0772265	-4.81265	1.48943e-06	1.45884e-05
	TIAM1	1415.49	-0.338247	0.0702924	-4.812	1.49424e-06	1.46253e-05
	VANGL1	1270.51	-0.349148	0.0725616	-4.81174	1.49621e-06	1.46343e-05
	PRKACB	455.248	-0.547897	0.113979	-4.80698	1.53225e-06	1.49763e-05
	PFN1	11732.4	-0.184037	0.0383266	-4.80182	1.57227e-06	1.53567e-05
	TUBB2B	387.691	-0.587493	0.122352	-4.80165	1.57365e-06	1.53594e-05
	EIF3H	10162.2	-0.163554	0.0340731	-4.8001	1.58587e-06	1.54678e-05
	MORN4	143.777	0.83317	0.173772	4.7946	1.62998e-06	1.58869e-05
	ATP2A2	8404.84	-0.168417	0.0351393	-4.79285	1.64431e-06	1.60154e-05
	GPRC5A	6501.31	0.210017	0.0438253	4.79213	1.65021e-06	1.60616e-05
	TPD52	7086.46	-0.177487	0.0370382	-4.79199	1.65136e-06	1.60616e-05
	WHSC1L1	4081.92	-0.224496	0.0468749	-4.78927	1.67392e-06	1.62696e-05
	KLHL21	3498.64	0.231327	0.04831	4.78839	1.68125e-06	1.63295e-05
	ZBTB43	785.258	0.430952	0.0900029	4.7882	1.68282e-06	1.63333e-05
	SLC28A3	25.2181	0.976697	0.203987	4.78804	1.6842e-06	1.63354e-05
	VPS51	2076.34	-0.282316	0.0589652	-4.78785	1.68578e-06	1.63393e-05
	FAM73B	668.752	0.459456	0.0960054	4.78573	1.70368e-06	1.65013e-05
	CNN2	2740.6	-0.255211	0.0533465	-4.78402	1.71827e-06	1.6631e-05
	MFN2	3558.03	0.225789	0.0472145	4.78219	1.73397e-06	1.67713e-05
	EFHD2	1269.2	-0.351737	0.0736339	-4.77683	1.78077e-06	1.72121e-05
	IL12RB2	223.06	-0.730479	0.153009	-4.77409	1.80517e-06	1.74358e-05
	ATP11C	2087.58	-0.281534	0.058977	-4.77363	1.80937e-06	1.74642e-05
	PHF10	649.09	-0.470995	0.0987118	-4.77141	1.82941e-06	1.76377e-05
	PPM1G	5362.54	-0.216058	0.0452822	-4.77136	1.82987e-06	1.76377e-05
	IFIT3	343.573	-0.616565	0.129277	-4.76931	1.84854e-06	1.78053e-05
	CRISPLD1	249.8	-0.702386	0.147277	-4.76914	1.85015e-06	1.78085e-05
	ARID1B	1702.54	-0.306887	0.0643915	-4.76596	1.87955e-06	1.8079e-05
	LAPTM4A	8698.47	-0.186734	0.0392074	-4.76272	1.91e-06	1.83592e-05
	RNF114	2414.25	0.269717	0.0566399	4.76195	1.91728e-06	1.84165e-05
	SYNCRIP	8893.55	-0.164016	0.0344731	-4.7578	1.95714e-06	1.87735e-05
	ORAI1	759.834	-0.436402	0.0917221	-4.75788	1.95641e-06	1.87735e-05
	STT3B	4971.09	-0.211386	0.0444569	-4.75486	1.98588e-06	1.9036e-05
	SYT11	64.2355	0.97275	0.204739	4.75117	2.0224e-06	1.93727e-05
	PRAME	881.687	-0.404088	0.0850563	-4.75083	2.02582e-06	1.93922e-05
	CTDSPL2	1823.06	-0.299759	0.0631413	-4.74743	2.06016e-06	1.97074e-05
	SLC13A3	186.201	0.769407	0.16211	4.74621	2.07261e-06	1.98128e-05
	TECR	7199.59	-0.187062	0.0394192	-4.74546	2.0803e-06	1.98727e-05
	TMEM200A	38.806	0.997533	0.210276	4.74392	2.09624e-06	2.00112e-05
	C1R	125.239	-0.843953	0.178065	-4.73957	2.14172e-06	2.04314e-05
	LAMC2	488.575	0.523718	0.110522	4.73861	2.15193e-06	2.05148e-05
	SELE	17.4269	0.909961	0.192069	4.73769	2.16172e-06	2.05941e-05
	YLPM1	2507.18	-0.259434	0.0547654	-4.73719	2.16705e-06	2.06307e-05
	PSPC1	1155.86	-0.358038	0.0756392	-4.7335	2.20684e-06	2.09951e-05
	FLOT2	2312.43	-0.26584	0.0561806	-4.73189	2.22437e-06	2.11474e-05
	PHLDA2	2393.82	-0.285414	0.0603519	-4.72917	2.25444e-06	2.14187e-05
	OBSCN	644.35	-0.515965	0.109153	-4.72698	2.27887e-06	2.16361e-05
	CDK18	884.956	-0.401158	0.084926	-4.72362	2.31679e-06	2.19811e-05
	STAG1	1915.92	-0.298889	0.0632909	-4.72246	2.33007e-06	2.2092e-05
	TTC9	1760.1	-0.302797	0.0641268	-4.72184	2.33724e-06	2.2145e-05
	VSIG10	588.842	-0.508896	0.107812	-4.72021	2.35596e-06	2.23072e-05
	CCDC40	82.546	0.929746	0.196978	4.72005	2.35785e-06	2.23098e-05
	IFIT5	411.905	-0.554959	0.117612	-4.71857	2.37511e-06	2.24579e-05
	VAPA	6993.33	-0.177725	0.0376752	-4.7173	2.38999e-06	2.25728e-05
	MED8	2936.65	0.240914	0.0510709	4.71725	2.3905e-06	2.25728e-05
	CDC42SE1	4184	0.210709	0.0446708	4.71693	2.39432e-06	2.25936e-05
	PHYHD1	152.756	-0.824502	0.174803	-4.71675	2.39645e-06	2.25984e-05
	SELK	578.828	0.492293	0.104381	4.71631	2.40166e-06	2.26322e-05
	C1orf21	712.48	-0.440138	0.0933376	-4.71555	2.41054e-06	2.27005e-05
	KMT2C	3676.67	-0.228649	0.0485096	-4.71348	2.43518e-06	2.29171e-05
	HNRNPDL	5748.88	-0.186387	0.0395646	-4.71095	2.46568e-06	2.31884e-05
	ACSF2	676.002	-0.453913	0.0963563	-4.71078	2.46775e-06	2.31922e-05
	KDELR2	13215.3	-0.152399	0.0323525	-4.71056	2.47035e-06	2.32009e-05
	FKBP2	726.037	0.436588	0.0927345	4.70793	2.50245e-06	2.34866e-05
	CSNK1A1	6795.62	0.180107	0.0382793	4.70507	2.53784e-06	2.38027e-05
	SFXN5	267.493	-0.654523	0.139116	-4.70487	2.54034e-06	2.38101e-05
	WWC3	881.327	-0.401369	0.0853499	-4.70263	2.56836e-06	2.40565e-05
	SOGA1	5101.51	-0.231503	0.0492376	-4.70175	2.57946e-06	2.41443e-05
	SH3D19	1029.35	-0.384122	0.0817101	-4.70104	2.58844e-06	2.41959e-05
	B3GALTL	613.294	-0.474222	0.100876	-4.70105	2.58827e-06	2.41959e-05
	LGALS1	4720.81	-0.200145	0.0426052	-4.69766	2.63154e-06	2.45823e-05
	KLK8	996.447	-0.384859	0.0819489	-4.69634	2.6487e-06	2.4726e-05
	ACVR2B	566.214	-0.495163	0.105507	-4.69319	2.68977e-06	2.50925e-05
	CA8	3168.8	0.271235	0.0578163	4.69132	2.71452e-06	2.53065e-05
	LLGL1	1695	-0.300981	0.0641683	-4.69049	2.72548e-06	2.53917e-05
	XRCC5	7632.41	-0.181385	0.0386818	-4.68916	2.74331e-06	2.55407e-05
	HNRNPC	8975.38	-0.177974	0.0379739	-4.68675	2.77575e-06	2.58113e-05
	DNAJC12	40.6332	0.985644	0.210305	4.68673	2.77608e-06	2.58113e-05
	STAU2	1417.21	-0.325685	0.069495	-4.68646	2.77977e-06	2.58277e-05
	UBL4A	1903.58	-0.286227	0.0610771	-4.68632	2.78156e-06	2.58277e-05
	PSMC3	4533.32	-0.208136	0.0444213	-4.6855	2.79281e-06	2.59149e-05
	TONSL	2940.76	-0.254078	0.0542466	-4.68376	2.81661e-06	2.61183e-05
	ALDH3A2	2957.51	-0.238721	0.0509776	-4.68286	2.82903e-06	2.62161e-05
	FXYD5	1870.08	-0.308891	0.0659652	-4.68263	2.83214e-06	2.62274e-05
	METTL16	874.535	0.405404	0.0865816	4.68233	2.83635e-06	2.6249e-05
	PACSIN3	1637.38	-0.307387	0.0656642	-4.68121	2.85193e-06	2.63756e-05
	MIF	972.751	-0.4261	0.0910494	-4.67987	2.87057e-06	2.65303e-05
	PDK4	88.309	0.920605	0.196725	4.67965	2.87372e-06	2.65419e-05
	C15orf39	1277.66	-0.343566	0.0734259	-4.67908	2.88167e-06	2.65977e-05
	DDX5	10522.2	-0.153785	0.0328738	-4.67805	2.89623e-06	2.67144e-05
	NFKBIA	1398.77	0.349801	0.0748011	4.67642	2.9193e-06	2.69093e-05
	PARP12	727.891	-0.453665	0.0970335	-4.67535	2.93453e-06	2.70318e-05
	IMPACT	734.858	-0.455904	0.0975258	-4.6747	2.94391e-06	2.71003e-05
	LRIG3	482.338	-0.519734	0.111193	-4.67418	2.95126e-06	2.71501e-05
	LIF	398.202	0.557034	0.119219	4.67237	2.97737e-06	2.73722e-05
	PPIF	2478.38	0.268379	0.0574425	4.67213	2.98089e-06	2.73864e-05
	USPL1	1372.4	0.336127	0.0719555	4.67132	2.99265e-06	2.74763e-05
	CCNYL1	618.609	0.463293	0.0991859	4.67095	2.99807e-06	2.7508e-05
	CHPF	890.508	0.397951	0.0852049	4.67052	3.00444e-06	2.75483e-05
	TGM5	121.172	-0.839048	0.179783	-4.66702	3.05606e-06	2.80032e-05
	MARK3	1808.43	0.296729	0.0636063	4.66508	3.08491e-06	2.82489e-05
	KCNC4	156.888	-0.779341	0.167087	-4.66428	3.09699e-06	2.8341e-05
	FIBP	1977.12	0.28932	0.0620656	4.66151	3.13893e-06	2.87058e-05
	TRPV4	102.51	-0.893084	0.191647	-4.66005	3.16136e-06	2.8892e-05
	CD101	53.0809	0.972843	0.208922	4.65648	3.21664e-06	2.93779e-05
	VPS8	857.925	0.404682	0.0869105	4.65631	3.2193e-06	2.93829e-05
	MT-CYB	54778.7	0.141232	0.030353	4.65299	3.27162e-06	2.98409e-05
	MARS	4190.87	0.211389	0.0454464	4.65138	3.29718e-06	3.00544e-05
	MICAL3	2784.82	-0.250394	0.053836	-4.65105	3.30247e-06	3.00829e-05
	NRARP	3054.18	-0.238848	0.0513849	-4.64821	3.34822e-06	3.04797e-05
	SYNGR1	346.352	-0.586997	0.126339	-4.64621	3.38087e-06	3.07569e-05
	TFDP1	4966.46	-0.19649	0.0422963	-4.64556	3.39158e-06	3.08341e-05
	SHROOM2	256.499	-0.661327	0.142455	-4.64235	3.44472e-06	3.12968e-05
	MNT	984.163	-0.380257	0.0819435	-4.64048	3.47608e-06	3.15612e-05
	FBXW5	2002.88	-0.277136	0.0597317	-4.63968	3.48941e-06	3.16616e-05
	CBX3	8495.28	-0.16638	0.0358672	-4.63878	3.50472e-06	3.17798e-05
	GBP3	352.821	-0.590514	0.127331	-4.63763	3.52425e-06	3.19153e-05
	SMURF2	1125.11	-0.361133	0.0778689	-4.63771	3.5229e-06	3.19153e-05
	PLEKHS1	436.891	-0.539862	0.116478	-4.63487	3.57164e-06	3.23235e-05
	ERGIC1	2182.68	-0.268112	0.0578536	-4.63432	3.58113e-06	3.23883e-05
	ANKRD54	989.328	0.376675	0.0813157	4.63226	3.61697e-06	3.26912e-05
	BCL3	335.562	0.592536	0.127968	4.63036	3.65036e-06	3.29716e-05
	AKT2	4282.67	-0.206478	0.0445962	-4.62995	3.6576e-06	3.30156e-05
	NGFRAP1	1276.17	-0.342126	0.0739495	-4.62648	3.71937e-06	3.35514e-05
	TAF1	2115.12	-0.284229	0.0614894	-4.62241	3.79313e-06	3.41946e-05
	POLR2K	2014.95	0.277737	0.0601062	4.62078	3.82307e-06	3.44423e-05
	PIK3C2B	617.308	-0.466877	0.101124	-4.61689	3.89538e-06	3.50711e-05
	RNF220	1988.46	-0.283483	0.0614092	-4.6163	3.90645e-06	3.51479e-05
	MLF1	929.984	0.383992	0.0832342	4.61339	3.96153e-06	3.56205e-05
	ACRC	58.3723	0.953404	0.206677	4.613	3.96892e-06	3.5664e-05
	CCNI	7008.37	-0.174173	0.0377608	-4.61254	3.97769e-06	3.57197e-05
	STX4	640.097	0.458893	0.0994957	4.61219	3.98446e-06	3.57574e-05
	TXNDC12	1689.51	0.29745	0.0645211	4.61011	4.0245e-06	3.60703e-05
	UNC93B1	2270.63	-0.263677	0.0571948	-4.61016	4.02357e-06	3.60703e-05
	DIRAS1	910.819	-0.393213	0.0853439	-4.60739	4.07756e-06	3.64835e-05
	FBRSL1	1548.28	-0.310316	0.0673525	-4.60734	4.07846e-06	3.64835e-05
	DRAM2	956.625	-0.390753	0.0848085	-4.60747	4.07591e-06	3.64835e-05
	HNF4G	124.714	-0.825851	0.179305	-4.60584	4.10813e-06	3.67253e-05
	HNRNPM	9244.77	-0.157074	0.0341096	-4.60498	4.12501e-06	3.68525e-05
	CTDSPL	1454.55	-0.335336	0.0728427	-4.60357	4.15315e-06	3.70802e-05
	COL7A1	80.5294	0.911955	0.198173	4.60181	4.18833e-06	3.73703e-05
	MTR	2223.44	-0.263363	0.0572343	-4.60148	4.19493e-06	3.74053e-05
	RPL9	6227.47	-0.181018	0.0393529	-4.59986	4.22775e-06	3.76737e-05
	FOXJ3	8803.77	0.16278	0.0354163	4.59619	4.30295e-06	3.82948e-05
	SPC24	393.919	-0.554692	0.120684	-4.59623	4.30197e-06	3.82948e-05
	MTSS1L	1912.87	-0.280213	0.0609755	-4.5955	4.31705e-06	3.83959e-05
	MLF2	4675.81	-0.201141	0.0437732	-4.59508	4.32586e-06	3.84497e-05
	TIMP3	64.7841	0.941761	0.204956	4.59494	4.3287e-06	3.84504e-05
	FANCL	711.148	-0.437977	0.0953257	-4.59453	4.33716e-06	3.84878e-05
	COPZ1	2352.44	-0.256354	0.0557963	-4.59447	4.33844e-06	3.84878e-05
	ISLR	38.2131	-0.965548	0.210282	-4.59169	4.39675e-06	3.89802e-05
	WDR83OS	3136.81	0.232636	0.0506751	4.59074	4.4168e-06	3.9133e-05
	NPM3	1087.14	0.379702	0.0827168	4.59038	4.42433e-06	3.91749e-05
	PACS1	2470.5	-0.265183	0.0577729	-4.5901	4.43043e-06	3.92039e-05
	ASIC3	33.71	0.957929	0.208719	4.58956	4.44185e-06	3.92801e-05
	ARL15	599.312	-0.462807	0.10088	-4.58771	4.48142e-06	3.96049e-05
	CASZ1	2164.79	-0.2692	0.0586949	-4.58644	4.50876e-06	3.9796e-05
	GBF1	3359.06	0.228917	0.0499108	4.58652	4.50692e-06	3.9796e-05
	B3GALNT1	263.237	-0.655144	0.142978	-4.58213	4.60263e-06	4.05987e-05
	PTGS2	22.5218	0.912132	0.199134	4.58048	4.63901e-06	4.08937e-05
	FGFR4	429.61	-0.554866	0.121162	-4.57955	4.65979e-06	4.1051e-05
	CPNE2	650.104	-0.449334	0.0981715	-4.57703	4.71622e-06	4.15219e-05
	AOC3	25.9858	0.937052	0.205016	4.57062	4.86283e-06	4.27855e-05
	RTFDC1	2113.47	0.280369	0.0613461	4.57028	4.87068e-06	4.28128e-05
	GPSM1	863.259	-0.396571	0.0867727	-4.57022	4.87208e-06	4.28128e-05
	ZNF532	1452.06	-0.31333	0.0685741	-4.56922	4.89538e-06	4.29904e-05
	FAM46A	512.247	0.494254	0.108245	4.56607	4.96952e-06	4.36141e-05
	CHST2	98.397	0.872506	0.191101	4.56567	4.97897e-06	4.36695e-05
	EBNA1BP2	7970.85	0.163462	0.0358413	4.56072	5.09788e-06	4.46842e-05
	DNAJC6	1161.64	-0.354397	0.0777114	-4.56042	5.10514e-06	4.47197e-05
	TSNARE1	533.698	-0.484697	0.10643	-4.55415	5.25974e-06	4.60288e-05
	RAB15	813.689	-0.405159	0.0889659	-4.55409	5.26119e-06	4.60288e-05
	FAM73A	548.524	0.5016	0.110191	4.55209	5.31151e-06	4.64399e-05
	HBEGF	67.0861	0.923354	0.202944	4.54981	5.36951e-06	4.69176e-05
	AZIN1	8301.68	0.177201	0.0389545	4.54892	5.39225e-06	4.70867e-05
	SYT7	2407.73	-0.258544	0.0568553	-4.5474	5.43121e-06	4.73972e-05
	CP	101.767	-0.853631	0.187725	-4.54724	5.43536e-06	4.74037e-05
	IRAK2	74.5216	0.915738	0.201411	4.54661	5.45156e-06	4.75152e-05
	TNS1	88.299	-0.882182	0.194202	-4.5426	5.55648e-06	4.83994e-05
	ZC3H4	1903.73	-0.284224	0.06258	-4.54177	5.57838e-06	4.85598e-05
	SERPINB5	2059.67	0.268263	0.0591196	4.53763	5.6891e-06	4.94927e-05
	CENPV	1105.49	-0.362247	0.0798352	-4.53744	5.69421e-06	4.95062e-05
	CCDC85B	1356.29	0.337194	0.0743755	4.53367	5.79685e-06	5.03672e-05
	HN1L	6710.08	-0.177088	0.0390735	-4.53217	5.83815e-06	5.06944e-05
	RASD1	37.8633	0.952651	0.210229	4.5315	5.85664e-06	5.08232e-05
	FEN1	2704.24	-0.239847	0.0529369	-4.5308	5.87606e-06	5.096e-05
	CLDN8	516.056	-0.49253	0.108775	-4.52797	5.95544e-06	5.15961e-05
	BCL2L11	1434.68	-0.311796	0.0688607	-4.52792	5.95681e-06	5.15961e-05
	TXNRD3	437.465	-0.527715	0.116592	-4.52616	6.00654e-06	5.19944e-05
	GPX4	6185.09	-0.180006	0.0397842	-4.52456	6.05205e-06	5.23559e-05
	PDLIM3	69.2755	0.920621	0.203495	4.52404	6.06715e-06	5.24539e-05
	RNF187	3685.96	-0.213192	0.0471686	-4.51979	6.19015e-06	5.34685e-05
	SNCA	92.2249	0.868685	0.192199	4.51972	6.19218e-06	5.34685e-05
	DDX27	2820.77	0.235517	0.0521125	4.5194	6.20139e-06	5.35148e-05
	ATP5G3	3061.11	-0.229621	0.0508117	-4.51906	6.21138e-06	5.35679e-05
	LEPREL2	964.529	-0.369208	0.081731	-4.51735	6.26177e-06	5.3969e-05
	NCAPG2	2219.38	-0.261812	0.0579622	-4.51695	6.27381e-06	5.40393e-05
	LAMB2	5466.75	-0.196683	0.0435567	-4.51558	6.31452e-06	5.43564e-05
	SGSM1	128.55	-0.803172	0.177894	-4.51488	6.33533e-06	5.45019e-05
	EGFR	4969.07	-0.196556	0.0435383	-4.51456	6.34495e-06	5.45509e-05
	EPN2	1965	-0.276821	0.0613591	-4.51148	6.43755e-06	5.52941e-05
	NSUN5	916.292	0.383098	0.0849172	4.51143	6.43933e-06	5.52941e-05
	ARID5A	609.332	0.451422	0.100124	4.50862	6.52501e-06	5.59953e-05
	RHOB	1311.54	0.326272	0.0723691	4.50844	6.53068e-06	5.60094e-05
	DENND5B	197.967	0.700017	0.15529	4.5078	6.55026e-06	5.61428e-05
	IRAK1	11056.3	0.144901	0.0321579	4.50591	6.60895e-06	5.66109e-05
	ANKRD42	204.779	0.695381	0.15458	4.49852	6.84273e-06	5.85775e-05
	TMEM138	986.006	0.37112	0.0825035	4.49823	6.85209e-06	5.86216e-05
	DIP2C	949.078	-0.375082	0.0833912	-4.49786	6.86393e-06	5.86868e-05
	BRINP2	557.215	-0.49491	0.11013	-4.49388	6.99363e-06	5.9759e-05
	CLCN2	886.263	0.395945	0.0881214	4.49318	7.01681e-06	5.99204e-05
	CCNE1	610.596	-0.452224	0.1007	-4.49079	7.09602e-06	6.05597e-05
	UBXN1	1628.17	0.297638	0.0663566	4.48543	7.27668e-06	6.20634e-05
	PDE1C	121.922	-0.804359	0.179384	-4.484	7.32562e-06	6.24426e-05
	ETF1	4580.83	0.20518	0.0457699	4.48286	7.36502e-06	6.27401e-05
	IGF2BP2	1599.98	-0.304545	0.0679556	-4.48154	7.41071e-06	6.30907e-05
	ABCF2	3077.18	0.224497	0.0501023	4.48078	7.4372e-06	6.32775e-05
	SPSB1	1334.12	-0.320044	0.071429	-4.48059	7.4438e-06	6.3295e-05
	AP2M1	9040.57	0.154967	0.0346028	4.47845	7.51878e-06	6.38936e-05
	GNAS	20270.2	-0.1351	0.0301744	-4.47731	7.55885e-06	6.41949e-05
	PPME1	2056.09	0.279967	0.0625351	4.47695	7.57153e-06	6.42634e-05
	HDGFRP2	1644.26	-0.293386	0.0655406	-4.47639	7.59148e-06	6.43935e-05
	PMVK	1598.41	0.298716	0.0667381	4.47594	7.60752e-06	6.44903e-05
	ARF3	2826.85	-0.236475	0.0528416	-4.47517	7.63519e-06	6.46855e-05
	TRIM65	1118.87	-0.35037	0.0783301	-4.47299	7.7133e-06	6.53075e-05
	ACTG1	42759.2	-0.112906	0.0252524	-4.47109	7.78216e-06	6.58505e-05
	QSER1	3609.09	-0.214955	0.048108	-4.46817	7.88915e-06	6.67153e-05
	NGRN	1201.22	0.333132	0.0745901	4.46616	7.96359e-06	6.73039e-05
	RERE	2462.22	-0.24515	0.0548927	-4.46599	7.96989e-06	6.73163e-05
	ZNF480	796.719	0.403846	0.0904535	4.46468	8.01881e-06	6.76885e-05
	GPATCH11	554.705	0.465891	0.104376	4.4636	8.05956e-06	6.79913e-05
	NT5DC1	416.786	-0.523572	0.117364	-4.46108	8.15469e-06	6.87522e-05
	AKR7A2	837.626	-0.389417	0.0873066	-4.46034	8.18314e-06	6.89502e-05
	LSS	3167.21	-0.221654	0.0497147	-4.45851	8.25305e-06	6.94972e-05
	TMEM56	377.235	-0.543711	0.121956	-4.45826	8.26284e-06	6.95291e-05
	RDX	5950.54	-0.173995	0.0390285	-4.45816	8.26681e-06	6.95291e-05
	P2RY2	175.735	-0.717499	0.160974	-4.45723	8.30243e-06	6.97865e-05
	MRI1	2521.59	-0.253059	0.0567937	-4.45577	8.35945e-06	7.02234e-05
	NUMA1	10693	-0.156178	0.0350724	-4.45302	8.46694e-06	7.10835e-05
	THRAP3	3329.93	-0.222634	0.0499997	-4.4527	8.47987e-06	7.11324e-05
	C6orf132	1116.42	-0.352963	0.079271	-4.45262	8.48298e-06	7.11324e-05
	MXI1	1074.98	-0.353639	0.0794546	-4.45082	8.55415e-06	7.16861e-05
	MMP25	410.175	-0.534352	0.120196	-4.44567	8.76195e-06	7.33833e-05
	BASP1	128.533	0.799868	0.18007	4.44199	8.91325e-06	7.46056e-05
	VEGFC	33.9371	0.928906	0.209367	4.43674	9.13315e-06	7.64003e-05
	ITSN2	1289.19	0.321498	0.0724755	4.43595	9.16679e-06	7.66357e-05
	WDR76	775.935	-0.398723	0.0899118	-4.4346	9.22423e-06	7.70697e-05
	CXXC4	87.0558	-0.863334	0.194689	-4.43442	9.23195e-06	7.70879e-05
	CD109	1456.41	0.305547	0.0689063	4.43424	9.2396e-06	7.71055e-05
	TRIP10	2039.58	-0.268749	0.0606114	-4.43396	9.25167e-06	7.71601e-05
	MAP3K9	1961.95	0.270021	0.0609273	4.43187	9.34213e-06	7.78679e-05
	CREBZF	2229.65	0.266571	0.0601773	4.42976	9.4337e-06	7.85841e-05
	PPDPF	2942.72	-0.233	0.0526128	-4.42858	9.48543e-06	7.89678e-05
	PARVB	549.607	-0.461671	0.104269	-4.42769	9.52495e-06	7.92494e-05
	PDCD11	3889.22	0.212635	0.0480256	4.42754	9.5314e-06	7.92557e-05
	AHCYL2	438.923	0.507177	0.114572	4.4267	9.56859e-06	7.95175e-05
	HOXC13	1548.67	-0.29692	0.0671041	-4.42476	9.65487e-06	8.01866e-05
	PTRHD1	696.235	-0.419798	0.0949024	-4.42347	9.71296e-06	8.0621e-05
	SLC9A7	539.731	0.468797	0.106025	4.42156	9.79921e-06	8.12885e-05
	KDM1B	696.632	0.420719	0.0951895	4.4198	9.87901e-06	8.18529e-05
	EYA4	23.1917	0.883785	0.199959	4.41983	9.87803e-06	8.18529e-05
	BTBD2	2885.67	-0.231508	0.0523929	-4.41869	9.93019e-06	8.22281e-05
	JUND	2350.97	-0.266656	0.0603726	-4.41683	1.00157e-05	8.28872e-05
	PAPSS1	4353.14	-0.203034	0.0459978	-4.414	1.01477e-05	8.39295e-05
	ADH5	1217.17	-0.328457	0.0744375	-4.41252	1.02176e-05	8.44574e-05
	PGD	5301.58	-0.189394	0.0429251	-4.4122	1.02326e-05	8.44809e-05
	ZFAND5	6339.25	0.174679	0.03959	4.4122	1.02323e-05	8.44809e-05
	HSPA4	6271.09	0.184056	0.0417329	4.41033	1.03211e-05	8.51108e-05
	ARL2BP	834.269	0.386079	0.0875379	4.41042	1.03168e-05	8.51108e-05
	RB1	197.672	0.685808	0.155508	4.41011	1.0332e-05	8.51506e-05
	CHST10	320.174	-0.578449	0.131177	-4.4097	1.03514e-05	8.52596e-05
	PODXL2	2072.08	-0.261916	0.0594639	-4.40461	1.05972e-05	8.72327e-05
	LRP3	1126	-0.347145	0.0788218	-4.40418	1.06187e-05	8.73579e-05
	RBL1	1264.71	-0.332747	0.0755602	-4.40374	1.06401e-05	8.74827e-05
	AKAP11	1287.77	-0.333633	0.0757685	-4.40331	1.06609e-05	8.76021e-05
	PPIG	2414.16	-0.258363	0.0586841	-4.40261	1.06958e-05	8.78366e-05
	EAF1	1283.55	0.33049	0.0750981	4.40078	1.07865e-05	8.85291e-05
	DHX58	201.176	-0.688449	0.156447	-4.40052	1.07991e-05	8.85807e-05
	RIT1	1303.01	0.317771	0.0722371	4.39899	1.08755e-05	8.91544e-05
	TMEM87A	3099.11	0.234669	0.0533547	4.39829	1.09109e-05	8.93926e-05
	BCL11A	510.094	-0.473118	0.107574	-4.39805	1.09226e-05	8.94353e-05
	APPL1	2799.8	-0.231741	0.0527107	-4.39648	1.10021e-05	9.0034e-05
	ABCE1	3826.54	0.209642	0.047692	4.39575	1.10392e-05	9.02843e-05
	EPB41L1	890.34	-0.382442	0.0870181	-4.39498	1.10784e-05	9.05519e-05
	CSRP1	2208.48	-0.252049	0.0573702	-4.39337	1.11607e-05	9.11706e-05
	SLC15A4	788.583	-0.392797	0.089486	-4.38948	1.1362e-05	9.27608e-05
	GDAP1	420.762	0.511855	0.116644	4.3882	1.14294e-05	9.32564e-05
	ECD	1025	0.357732	0.0815798	4.38505	1.15957e-05	9.45583e-05
	SPATA20	399.648	-0.519878	0.118591	-4.38379	1.16634e-05	9.49986e-05
	NCOA3	1816.52	0.273788	0.062453	4.38391	1.16569e-05	9.49986e-05
	ATP2B1	940.739	0.376679	0.0859351	4.3833	1.16895e-05	9.51557e-05
	ZNF488	83.4612	-0.865198	0.197726	-4.37575	1.21018e-05	9.84544e-05
	CHD3	4349.17	-0.203742	0.0465689	-4.37507	1.21391e-05	9.87002e-05
	EZH2	2252.63	-0.260928	0.0596668	-4.37307	1.22509e-05	9.95509e-05
	SH3YL1	2010.77	-0.279604	0.0639758	-4.37046	1.23987e-05	0.000100693
	DAZAP1	3452.89	-0.210696	0.0482188	-4.36958	1.24488e-05	0.000101041
	SLC24A3	87.1419	-0.849029	0.19433	-4.369	1.24817e-05	0.000101249
	VPS13D	1700.52	-0.30027	0.0688404	-4.36183	1.28981e-05	0.000104566
	NCKAP5	134.673	0.762373	0.174961	4.35738	1.31629e-05	0.000106651
	APOPT1	360.98	0.551212	0.126568	4.35505	1.33037e-05	0.000107729
	DDX21	9829.63	0.150177	0.0344883	4.35444	1.33409e-05	0.000107968
	KIFC1	1974.61	-0.264757	0.0608357	-4.352	1.34901e-05	0.000109112
	LAPTM4B	15429.7	-0.137863	0.0317163	-4.34675	1.38172e-05	0.000111692
	DDX39A	6795.96	0.163602	0.0376435	4.34608	1.38589e-05	0.000111939
	C9orf78	1820.61	0.274628	0.0631908	4.34601	1.38638e-05	0.000111939
	FAM20B	3693.68	-0.206565	0.0475572	-4.3435	1.40229e-05	0.000113158
	SPPL3	3684.44	-0.2118	0.0487838	-4.34161	1.41445e-05	0.000114073
	WNT5A	202.785	0.695566	0.160268	4.34001	1.42475e-05	0.000114837
	IL34	183.937	0.69428	0.159996	4.33936	1.42897e-05	0.000115111
	PHF1	487.391	0.47773	0.11011	4.33868	1.43343e-05	0.000115403
	STAT6	2485.56	-0.241395	0.0556794	-4.33544	1.45469e-05	0.00011698
	FOXA1	679.592	0.432293	0.0997103	4.33549	1.45437e-05	0.00011698
	SLC2A1	6895.41	0.162816	0.0375736	4.33325	1.46922e-05	0.00011808
	HDAC6	1217.32	-0.3336	0.0770055	-4.33216	1.47653e-05	0.000118599
	SLC2A4RG	1238.35	-0.325308	0.0751022	-4.33153	1.48075e-05	0.000118869
	C11orf86	123.845	0.775824	0.179533	4.32135	1.55075e-05	0.000124417
	ZBTB47	183.746	-0.685379	0.158694	-4.31886	1.56839e-05	0.00012576
	SLC37A4	637.263	-0.427052	0.0988909	-4.31841	1.57155e-05	0.000125941
	PKP1	11868.3	0.155324	0.0359806	4.31688	1.5825e-05	0.000126745
	ATP5G1	809.216	-0.388481	0.0900153	-4.31572	1.59083e-05	0.000127339
	HEATR2	3195.75	-0.215025	0.0498839	-4.31052	1.62873e-05	0.000130298
	TMEM184A	1162.95	-0.333682	0.0774676	-4.30737	1.65207e-05	0.00013209
	SH3PXD2A	1259.74	-0.315661	0.0733081	-4.30595	1.66271e-05	0.000132865
	MCCC1	1106.75	-0.332836	0.0773785	-4.3014	1.69721e-05	0.000135543
	MPG	603.729	-0.43503	0.101289	-4.29493	1.7475e-05	0.000139479
	MRFAP1	3809.34	0.205355	0.0478281	4.29361	1.75793e-05	0.000140232
	RNF2	796.839	-0.387209	0.0901942	-4.29305	1.76234e-05	0.000140503
	HNRNPUL1	9762.29	-0.156601	0.0364793	-4.29288	1.76373e-05	0.000140533
	CSPP1	1148.1	0.326195	0.075991	4.29255	1.76634e-05	0.00014058
	SOX12	963.984	-0.354878	0.0826714	-4.29263	1.76566e-05	0.00014058
	ZNF217	3898.85	-0.205018	0.0477833	-4.29057	1.78212e-05	0.000141755
	CCNI2	39.2056	-0.901792	0.210303	-4.28806	1.80237e-05	0.000143284
	AK3	918.959	-0.370997	0.0865257	-4.28771	1.80524e-05	0.000143431
	MRPL49	2144.67	0.253538	0.0591379	4.28723	1.80912e-05	0.000143657
	CDH1	4557.54	-0.188714	0.0440335	-4.28569	1.82176e-05	0.000144578
	CEP135	259.05	0.604466	0.141082	4.2845	1.83152e-05	0.00014527
	CDK16	2799.17	-0.22641	0.0528869	-4.28103	1.86033e-05	0.000147471
	HIBADH	943.868	-0.353749	0.0826594	-4.2796	1.87228e-05	0.000148334
	KLHL22	344.001	-0.546068	0.127607	-4.2793	1.87479e-05	0.000148449
	VPS13A	2628.1	-0.25527	0.0596695	-4.27806	1.88527e-05	0.000149193
	NDUFA4	5874.12	0.168982	0.0395142	4.27648	1.89868e-05	0.00015017
	BCL2	392.272	-0.512434	0.119853	-4.27553	1.90685e-05	0.00015073
	FANCI	1855.07	-0.265999	0.062226	-4.27473	1.91368e-05	0.000151184
	CYSTM1	803.89	0.38345	0.0897222	4.27375	1.92216e-05	0.000151768
	NCDN	1139.93	-0.331655	0.077621	-4.27275	1.93079e-05	0.000152363
	CIDEB	364.847	-0.539961	0.126408	-4.27158	1.94089e-05	0.000153074
	SNAPC5	389.008	0.517002	0.121053	4.27088	1.94705e-05	0.000153472
	IFT140	667.607	-0.410064	0.0960527	-4.26916	1.96212e-05	0.000154503
	TRIM2	8020.15	-0.156795	0.0367275	-4.26913	1.96235e-05	0.000154503
	WNT3	94.9726	-0.818092	0.191689	-4.26781	1.97406e-05	0.000155337
	TTC14	545.47	0.452728	0.106087	4.26751	1.9767e-05	0.000155457
	LRRC8D	1785.11	-0.269471	0.0631484	-4.26727	1.97881e-05	0.000155536
	ZHX1	1952.77	0.260678	0.0610928	4.26692	1.98192e-05	0.000155627
	HNRNPA0	6004.73	-0.169467	0.0397169	-4.26689	1.98221e-05	0.000155627
	B4GALNT4	2049.4	-0.257692	0.0603959	-4.26672	1.98371e-05	0.000155657
	PPP1CC	4199.28	-0.196722	0.0461186	-4.26557	1.9939e-05	0.000156281
	MYBL1	964.48	0.350004	0.0820511	4.26568	1.99294e-05	0.000156281
	SV2B	242.599	0.619889	0.145333	4.26529	1.99642e-05	0.00015639
	KIF3B	1862.82	0.263992	0.061981	4.25925	2.05117e-05	0.000160588
	DMD	898.486	0.367876	0.0864136	4.25715	2.07051e-05	0.000162012
	RYBP	853.599	0.369233	0.086743	4.25663	2.07528e-05	0.000162206
	TRAK2	1127.04	0.341392	0.0802023	4.25663	2.07532e-05	0.000162206
	BTAF1	1739.39	0.275865	0.0648132	4.25631	2.07827e-05	0.000162345
	YME1L1	6495.58	0.165083	0.0388237	4.25211	2.11763e-05	0.000165327
	CNTLN	235.559	-0.630289	0.148265	-4.25109	2.12737e-05	0.000165995
	SLC4A11	993.831	-0.346551	0.0815478	-4.24966	2.14096e-05	0.000166961
	LMNA	18730.6	0.131933	0.0310505	4.24898	2.14749e-05	0.000167377
	TBC1D2	362.461	-0.532049	0.125264	-4.24742	2.16245e-05	0.000168448
	MAP3K10	500.3	0.463253	0.109137	4.2447	2.18884e-05	0.000170409
	C2orf43	307.221	-0.597315	0.140819	-4.24171	2.21825e-05	0.000172602
	UBTF	2836.72	-0.226094	0.0533086	-4.24124	2.22292e-05	0.000172869
	ECHDC1	736.602	-0.399016	0.0940872	-4.24092	2.22606e-05	0.000173017
	CYR61	1743.2	0.274926	0.0648566	4.23899	2.24532e-05	0.000174416
	SLC37A3	1991.19	0.256399	0.0604955	4.23832	2.25197e-05	0.000174835
	VDAC2	1418.47	0.298897	0.0705308	4.23782	2.25699e-05	0.000175127
	TNFAIP8L1	482.518	-0.50234	0.118553	-4.23725	2.26277e-05	0.000175478
	RARRES3	217.8	-0.653336	0.154196	-4.23705	2.26476e-05	0.000175535
	PVRL4	2949.4	-0.224153	0.0529097	-4.23651	2.27016e-05	0.000175855
	KDELR1	5002.94	-0.175637	0.0414616	-4.23615	2.27387e-05	0.000176045
	HLA-F	220.726	-0.634426	0.14982	-4.2346	2.2896e-05	0.000177164
	NIPSNAP1	2175.86	-0.248782	0.0588186	-4.22964	2.34062e-05	0.000181012
	BZW2	4848.95	-0.177449	0.0419723	-4.22776	2.36033e-05	0.000182434
	PANX2	1120.3	-0.323931	0.0766248	-4.22749	2.3631e-05	0.000182547
	GREB1L	494.638	-0.462065	0.109323	-4.22662	2.3723e-05	0.000183156
	ASH2L	2254.47	-0.254947	0.0603377	-4.22534	2.38578e-05	0.000183993
	METTL7A	93.0541	-0.813729	0.192582	-4.22536	2.38562e-05	0.000183993
	MLEC	5948.74	-0.168093	0.0397947	-4.22401	2.39997e-05	0.000184985
	SAA2	192.777	0.677768	0.160498	4.2229	2.41175e-05	0.00018579
	ATP10A	255.251	-0.604053	0.143123	-4.22051	2.4375e-05	0.000187466
	SERPINB1	388.874	-0.513544	0.121674	-4.22067	2.4358e-05	0.000187466
	GNL2	3726.35	-0.201078	0.047643	-4.22051	2.43754e-05	0.000187466
	DENND3	629.023	0.423473	0.100392	4.2182	2.4626e-05	0.000189289
	ZNF260	843.873	0.367169	0.0870831	4.21631	2.48338e-05	0.000190686
	RHOD	1140.36	0.357916	0.0848889	4.21629	2.48351e-05	0.000190686
	NARS	2821.28	0.223825	0.05311	4.21438	2.50468e-05	0.000192205
	REL	954.562	0.35635	0.0845629	4.21403	2.50859e-05	0.00019233
	PRDX5	3653.34	0.201045	0.0477091	4.21398	2.50908e-05	0.00019233
	CUX1	2442.72	-0.236677	0.0561676	-4.21377	2.51144e-05	0.000192406
	CRTC2	1968.52	0.254198	0.060352	4.21193	2.53201e-05	0.000193875
	EIF3A	10584.3	-0.150282	0.0356937	-4.21031	2.55021e-05	0.000195161
	DUS1L	2501.69	0.231243	0.0549571	4.20771	2.57971e-05	0.00019731
	RAB10	7133.29	-0.157422	0.0374465	-4.20393	2.62324e-05	0.00020053
	ABCB1	1185.12	0.322548	0.0767553	4.2023	2.64222e-05	0.00020187
	HMGXB3	2022.94	0.255819	0.0608779	4.20217	2.64371e-05	0.000201873
	KCNS3	164.97	0.70368	0.167574	4.19921	2.67842e-05	0.000204411
	CACNG4	40.2784	-0.883045	0.210305	-4.19887	2.68246e-05	0.000204565
	PRKCD	1636.81	-0.283068	0.0674164	-4.1988	2.68337e-05	0.000204565
	CPNE8	348.905	-0.536787	0.127861	-4.19821	2.69039e-05	0.000204988
	SRGAP1	791.503	-0.37387	0.0890708	-4.19745	2.69935e-05	0.000205558
	DFNB31	280.677	0.591108	0.140864	4.1963	2.71312e-05	0.000206494
	TBC1D1	1522.9	-0.283769	0.0676325	-4.19574	2.71979e-05	0.000206889
	HSPA8	26991.3	-0.119118	0.0283917	-4.1955	2.72266e-05	0.000206993
	NFIC	2920.61	-0.215347	0.0513851	-4.19085	2.7791e-05	0.000211169
	OVGP1	45.0964	0.880169	0.210086	4.18957	2.79487e-05	0.000212251
	MKX	47.5688	0.879357	0.209991	4.18759	2.81938e-05	0.000213997
	EHD2	1956.68	-0.252749	0.0603587	-4.18746	2.82098e-05	0.000214001
	XBP1	2309.4	0.237263	0.0566645	4.18716	2.82472e-05	0.000214086
	FAM216A	446.371	0.476993	0.113919	4.18712	2.82517e-05	0.000214086
	CENPI	734.44	-0.385431	0.0920696	-4.1863	2.83539e-05	0.000214744
	KLF3	1281.9	-0.302655	0.0723402	-4.18377	2.86711e-05	0.000217027
	RPL34	5320.29	-0.176503	0.0421922	-4.1833	2.87303e-05	0.000217358
	MITF	294.134	0.57043	0.136375	4.1828	2.87936e-05	0.000217718
	EIF4G1	24025.3	-0.11573	0.0276746	-4.18182	2.8919e-05	0.000218548
	BAZ2A	4723.06	-0.182025	0.0435527	-4.17942	2.92248e-05	0.000220739
	RCOR3	1113.61	-0.331202	0.0792817	-4.17753	2.94691e-05	0.000222313
	TNFAIP6	15.6479	0.780161	0.186756	4.17744	2.94811e-05	0.000222313
	CEACAM1	449.039	-0.479543	0.11479	-4.17758	2.94622e-05	0.000222313
	ME1	1468.44	0.295053	0.0706473	4.17643	2.96122e-05	0.000223181
	NRSN2	370.528	-0.512203	0.122656	-4.17595	2.96746e-05	0.00022353
	DNPH1	358.823	-0.522774	0.125241	-4.17416	2.99089e-05	0.000225174
	GSE1	1313.92	-0.311328	0.0746184	-4.17227	3.01586e-05	0.000226931
	VSTM5	35.3108	-0.873875	0.209576	-4.16974	3.04949e-05	0.000229338
	SKIV2L	1176.05	0.322802	0.0774186	4.16957	3.05175e-05	0.000229384
	DHDDS	1077.11	0.327133	0.0784674	4.16903	3.05896e-05	0.000229801
	CD302	107.049	-0.771533	0.185069	-4.1689	3.0607e-05	0.000229808
	MED12	2663.65	-0.223457	0.0536086	-4.1683	3.06879e-05	0.000230292
	EIF4G2	27592.6	0.108547	0.0260501	4.16686	3.08824e-05	0.000231626
	ISG20	212.059	0.6329	0.151911	4.16626	3.09644e-05	0.000232116
	ARHGAP17	1352.08	0.298388	0.0716301	4.16568	3.10425e-05	0.000232576
	MBTPS1	3186.24	-0.215901	0.051837	-4.16501	3.11343e-05	0.000233139
	SYBU	415.535	0.490934	0.11792	4.16329	3.13692e-05	0.000234772
	STS	950.668	-0.350367	0.0841613	-4.16305	3.14028e-05	0.000234897
	UBXN4	4104.08	-0.187626	0.045077	-4.16235	3.14984e-05	0.000235486
	U2AF2	6244.53	0.161419	0.0387824	4.16218	3.15221e-05	0.000235537
	RBM15B	3266.07	-0.205223	0.0493108	-4.16182	3.15721e-05	0.000235783
	ID2	2105.86	-0.250145	0.0601331	-4.15986	3.18443e-05	0.000237689
	PSEN2	463.499	-0.468182	0.112617	-4.15728	3.22056e-05	0.000240257
	PRR12	1597.49	-0.277011	0.0666407	-4.15679	3.22752e-05	0.000240647
	C9orf3	615.125	0.442058	0.1064	4.15467	3.25762e-05	0.000242762
	RBM5	1709.96	0.267378	0.0644081	4.15131	3.30581e-05	0.000246221
	ARRDC3	337.992	0.546893	0.131784	4.14991	3.32605e-05	0.000247596
	SLC4A4	493.606	-0.487737	0.117589	-4.14781	3.35671e-05	0.000249745
	ABHD15	252.324	-0.593613	0.143164	-4.14639	3.37759e-05	0.000251164
	ITGB5	1112.45	-0.324583	0.0783422	-4.14315	3.42566e-05	0.000254603
	GRK5	527.448	-0.442428	0.106978	-4.13571	3.53853e-05	0.000262851
	VGLL4	3363.68	0.212978	0.0515034	4.13523	3.54595e-05	0.000263263
	IRF6	2384.97	0.229663	0.0555469	4.13457	3.55616e-05	0.00026388
	RNPEPL1	650.503	-0.410755	0.0993961	-4.13251	3.58827e-05	0.00026612
	RELA	2545.9	0.226722	0.0548825	4.13105	3.61105e-05	0.000267612
	CDC45	743.223	-0.37843	0.0916077	-4.13098	3.61222e-05	0.000267612
	TLN1	8116.16	0.147728	0.0357749	4.12939	3.63723e-05	0.000269321
	JMJD6	487.866	0.460549	0.111546	4.1288	3.64665e-05	0.000269875
	UBA7	414.027	-0.499084	0.120948	-4.12645	3.684e-05	0.000272495
	KDM2A	6857.16	0.153665	0.0372586	4.12429	3.71887e-05	0.000274928
	TCIRG1	1456.33	-0.301213	0.0730441	-4.12371	3.72824e-05	0.000275328
	BRAT1	2389	0.236222	0.0572833	4.12376	3.72738e-05	0.000275328
	ATOX1	710.826	0.387149	0.0939018	4.12292	3.74103e-05	0.000276126
	EIF4A2	8599.38	0.153897	0.0373463	4.1208	3.77552e-05	0.000278377
	SPCS3	2133.29	-0.250722	0.0608424	-4.12085	3.77482e-05	0.000278377
	EFEMP1	145.693	-0.710006	0.172359	-4.11934	3.7996e-05	0.000279904
	EEPD1	215.963	-0.621643	0.15091	-4.1193	3.80025e-05	0.000279904
	ASPHD1	250.049	0.587387	0.142633	4.11818	3.81872e-05	0.000281116
	FUT2	295.004	-0.551871	0.134039	-4.11724	3.83444e-05	0.000282124
	PTMS	5858.61	-0.395812	0.096169	-4.11579	3.8585e-05	0.000283745
	KBTBD8	61.4112	0.844005	0.205147	4.11414	3.88628e-05	0.000285636
	METRN	889.011	-0.362299	0.0880807	-4.11326	3.90106e-05	0.000286571
	CBLB	323.791	0.544534	0.132399	4.11283	3.9083e-05	0.000286952
	TBL1XR1	2851.43	-0.21619	0.0525893	-4.11091	3.94098e-05	0.000289199
	CCL2	88.1821	0.80174	0.195066	4.11009	3.95497e-05	0.000290073
	LRRC58	2897.63	-0.212009	0.051612	-4.10774	3.99545e-05	0.000292888
	PPP1R11	1163.32	0.312548	0.0761146	4.10629	4.02067e-05	0.000294581
	EFNA1	4555	-0.177326	0.0432344	-4.1015	4.10485e-05	0.000300591
	RRN3	1778.84	0.272671	0.066506	4.09994	4.13257e-05	0.000302461
	PDE4D	56.1002	0.853756	0.208292	4.09885	4.15203e-05	0.000303726
	ARPP19	4323.63	-0.184125	0.0449325	-4.09781	4.17085e-05	0.000304942
	APRT	2569.13	-0.223671	0.0546503	-4.09276	4.26266e-05	0.000311492
	MYBL2	5564.01	-0.17707	0.0432658	-4.09262	4.26533e-05	0.000311523
	ADCK5	455.626	-0.48082	0.117495	-4.09225	4.27211e-05	0.000311793
	RCAN1	2774.33	0.216751	0.0529673	4.09217	4.2735e-05	0.000311793
	WDR74	1741.63	0.264296	0.0645953	4.09157	4.28466e-05	0.000312444
	SEC61G	1459.17	0.282719	0.0691478	4.08863	4.33935e-05	0.000316266
	HOMER2	494.873	-0.445352	0.108943	-4.08792	4.35252e-05	0.00031706
	PDGFA	133.282	-0.718267	0.175838	-4.08482	4.41109e-05	0.000320965
	DNAJC25	326.654	0.533315	0.130563	4.08472	4.41304e-05	0.000320965
	HGSNAT	1399.08	-0.290348	0.0710774	-4.08495	4.40856e-05	0.000320965
	KMT2A	8220.95	-0.149006	0.0364866	-4.08385	4.42947e-05	0.000321992
	FBRS	1714.74	0.269977	0.0661173	4.0833	4.44001e-05	0.00032259
	UIMC1	784.434	0.377503	0.0924857	4.08174	4.46998e-05	0.000324429
	PTPLAD2	68.8377	-0.8259	0.202336	-4.08182	4.46837e-05	0.000324429
	FTL	13410.5	0.128294	0.0314435	4.08016	4.50045e-05	0.00032647
	KMT2D	3361.12	-0.379171	0.0929361	-4.07991	4.50538e-05	0.000326657
	CCRN4L	509.707	0.443431	0.108691	4.07974	4.50867e-05	0.000326726
	EEF1B2	4697.37	-0.178042	0.0436492	-4.07893	4.52431e-05	0.000327689
	FZD6	3539.9	-0.194308	0.0476405	-4.07862	4.53029e-05	0.000327951
	NUDT21	2993.44	-0.216556	0.0531125	-4.0773	4.55608e-05	0.000329647
	PCK2	419.881	0.475417	0.116623	4.07653	4.57129e-05	0.000330576
	TMEM219	719.733	-0.399254	0.0980119	-4.07353	4.63064e-05	0.000334694
	AIG1	221.776	-0.618872	0.151946	-4.07297	4.64165e-05	0.000335142
	SSBP4	1053.83	-0.321863	0.0790235	-4.073	4.64106e-05	0.000335142
	TJP3	990.055	-0.333279	0.0818356	-4.07254	4.65024e-05	0.000335588
	MDN1	2670.78	-0.238014	0.0584779	-4.07015	4.69829e-05	0.000338881
	CSRNP2	1292.42	0.298977	0.0734816	4.06873	4.7271e-05	0.000340782
	GFRA3	79.8484	-0.800479	0.19676	-4.0683	4.73567e-05	0.000341223
	TICRR	853.186	-0.361103	0.0888049	-4.06625	4.77755e-05	0.000344063
	SEC61A2	181.762	0.656165	0.161419	4.06498	4.80357e-05	0.000345758
	RABEP1	1471.92	-0.279906	0.0689201	-4.06131	4.87975e-05	0.00035106
	WDR83	625.698	0.403846	0.0994437	4.06105	4.88517e-05	0.000351268
	PPEF1	56.8086	0.839291	0.206706	4.06031	4.90081e-05	0.000352211
	TK1	2029.52	-0.246685	0.060758	-4.06012	4.90474e-05	0.000352312
	LSG1	1755.84	0.264726	0.0652131	4.0594	4.91996e-05	0.000353222
	PLEKHN1	236.59	-0.59197	0.145915	-4.05697	4.97145e-05	0.000356736
	SERTAD1	312.887	0.53929	0.132953	4.05624	4.98684e-05	0.000357655
	PRRC1	3451.67	-0.205337	0.0506265	-4.05592	4.99364e-05	0.000357959
	DLX3	156.855	-0.693085	0.170953	-4.05424	5.02966e-05	0.00036002
	AUP1	2972.28	0.20814	0.0513391	4.05422	5.03014e-05	0.00036002
	NT5E	200.495	0.624978	0.154146	4.05444	5.02536e-05	0.00036002
	GUK1	3322.92	0.219189	0.0540931	4.05206	5.07686e-05	0.000363176
	TRIM17	49.0544	-0.847424	0.2092	-4.05079	5.10446e-05	0.000364964
	ZNF304	324.483	0.524633	0.129519	4.05063	5.10804e-05	0.000365032
	SLC26A2	2346.51	0.23312	0.0575742	4.04903	5.143e-05	0.000367154
	NUP205	4933.68	-0.168711	0.041666	-4.04912	5.14112e-05	0.000367154
	PPP2R2C	671.402	-0.38636	0.0954542	-4.04759	5.1748e-05	0.000369234
	RPS19	21023.1	-0.116026	0.0286682	-4.0472	5.18346e-05	0.000369663
	ERP44	1357.36	0.286347	0.0707711	4.0461	5.20775e-05	0.000371206
	PLEKHA7	848.297	-0.357378	0.0883484	-4.04509	5.23027e-05	0.00037262
	DPH3	665.715	0.388569	0.096121	4.0425	5.28834e-05	0.000376564
	C20orf112	1408.99	-0.281736	0.0696973	-4.04228	5.29343e-05	0.000376734
	AS3MT	33.7338	-0.847039	0.209617	-4.04089	5.32494e-05	0.000378784
	PARVA	1037.27	-0.323769	0.0801576	-4.03915	5.36451e-05	0.000381145
	MUS81	1017.07	0.328423	0.0813115	4.03907	5.36636e-05	0.000381145
	DYRK2	2804.25	-0.212891	0.0527067	-4.03916	5.36431e-05	0.000381145
	DPH2	2328.47	0.24519	0.0607293	4.03743	5.40409e-05	0.00038363
	GABBR2	31.3445	0.841528	0.208608	4.03402	5.48315e-05	0.000388694
	FIGNL1	1246.86	-0.296777	0.0735681	-4.03405	5.48247e-05	0.000388694
	SCNN1A	423.191	-0.483129	0.119765	-4.03399	5.4838e-05	0.000388694
	ADORA2B	711.805	-0.381202	0.0945219	-4.03295	5.50798e-05	0.00039021
	FOXF2	86.2921	-0.790689	0.196143	-4.03119	5.54942e-05	0.000392945
	RASSF7	705.614	-0.380293	0.094344	-4.03092	5.55599e-05	0.000393211
	IQGAP3	3484.22	-0.228247	0.0566307	-4.03045	5.56709e-05	0.000393796
	NUF2	1945.9	0.249971	0.0620443	4.02891	5.60354e-05	0.000396173
	ARNT2	152.307	-0.67826	0.168421	-4.02716	5.64555e-05	0.000398941
	LMX1B	854.05	-0.350908	0.0871713	-4.0255	5.68541e-05	0.000401554
	SMOX	411.844	0.484953	0.120538	4.02325	5.74015e-05	0.000405214
	SCARB1	1857.99	-0.249731	0.0621176	-4.02028	5.81278e-05	0.000410134
	GOLIM4	1645.95	-0.260492	0.0648577	-4.01637	5.91015e-05	0.000416371
	ZBTB38	1704.47	0.259929	0.0647169	4.01639	5.90959e-05	0.000416371
	LPCAT1	2363.82	-0.232369	0.0578522	-4.0166	5.9043e-05	0.000416371
	TPCN1	661.942	0.391275	0.0974426	4.01544	5.93343e-05	0.0004178
	PEG10	2971.36	0.207614	0.0517384	4.01276	6.00133e-05	0.000422154
	ARNTL	146.801	0.686566	0.171095	4.01277	6.00113e-05	0.000422154
	AK4	2286.15	-0.229132	0.0571396	-4.01004	6.07078e-05	0.000426824
	PDE5A	394.272	0.51451	0.12843	4.00615	6.1717e-05	0.0004337
	CASP8	491.486	0.437692	0.109314	4.004	6.22797e-05	0.000437434
	BUB3	3575.86	-0.198729	0.0496406	-4.00336	6.24486e-05	0.000438399
	LRP6	2870.22	-0.208734	0.0521624	-4.00162	6.29104e-05	0.000441419
	LY6E	8320.86	-0.148676	0.0371561	-4.0014	6.29697e-05	0.000441612
	USP34	5463	-0.168847	0.042247	-3.99666	6.42418e-05	0.000450307
	CHI3L1	459.105	-0.457265	0.114436	-3.99582	6.44695e-05	0.000451676
	PPP1R26	1192.14	-0.298801	0.0747853	-3.99545	6.45725e-05	0.00045217
	LSM10	479.802	0.441226	0.110488	3.99343	6.51245e-05	0.000455806
	RNF115	2874.92	0.205399	0.0514401	3.99298	6.52482e-05	0.000456443
	OST4	2568.72	-0.224576	0.0562462	-3.99273	6.53167e-05	0.000456692
	C12orf39	37.5203	0.838204	0.210093	3.98968	6.6162e-05	0.00046237
	CDC42BPG	2208.42	0.229967	0.0576475	3.98919	6.62997e-05	0.000463086
	SMAD6	494.16	-0.437693	0.109723	-3.98908	6.63309e-05	0.000463086
	ANKS6	1637.31	-0.27271	0.068411	-3.98634	6.71011e-05	0.000468228
	PGRMC1	6299.08	-0.154706	0.0388266	-3.98454	6.76111e-05	0.000471551
	CALCOCO2	999.803	0.321412	0.0806732	3.98413	6.77281e-05	0.00047213
	TMEM220	35.9593	-0.836725	0.210045	-3.98356	6.78911e-05	0.00047303
[truncated: 14,486 more rows]

## Sheet: FCIBC02PR->Pacli_Vs_Vehicle
Treatment	id	baseMean	log2FoldChange	lfcSE	stat	pvalue	padj
2e-7M Paclitaxel	MX1	3641.56	1.30142	0.0689594	18.8723	1.92618e-79	2.14788e-75
	IFI6	1019.57	1.39497	0.0886935	15.728	9.72533e-56	5.42236e-52
	IFIT1	496.431	1.47353	0.0987299	14.9249	2.27032e-50	8.43877e-47
	IFIT2	1001.36	1.25879	0.0853532	14.7479	3.17175e-49	8.84205e-46
	DDX60	1770.75	1.16744	0.0812602	14.3667	8.3776e-47	1.86837e-43
	PARP14	2046.12	1.04274	0.0825388	12.6334	1.38218e-36	2.56879e-33
	OAS2	259.925	1.28178	0.104697	12.2428	1.83594e-34	2.92464e-31
	OAS3	1963.08	0.9515	0.0782467	12.1603	5.05948e-34	7.05228e-31
	SAMD9	755.092	1.10049	0.0941993	11.6826	1.56488e-31	1.93888e-28
	IFIT3	493.364	1.07861	0.096581	11.1679	5.85477e-29	6.52865e-26
	OAS1	300.364	1.12711	0.103217	10.9198	9.27005e-28	9.39731e-25
	PARP9	1196.5	0.870863	0.0839272	10.3764	3.17501e-25	2.95038e-22
	ISG15	1137.65	0.811349	0.0847923	9.56867	1.08295e-21	9.28921e-19
	STAT1	4695.53	0.667972	0.0710701	9.39878	5.51993e-21	4.39663e-18
	EIF2AK2	4529.93	0.674436	0.0721582	9.34663	9.04855e-21	6.72669e-18
	XAF1	244.17	0.970937	0.104709	9.27268	1.81528e-20	1.26514e-17
	HERC6	859.483	0.810403	0.0878081	9.22925	2.72531e-20	1.78765e-17
	IFI44	335.866	0.938366	0.102752	9.13236	6.70206e-20	4.15193e-17
	IFIH1	1187.8	0.749208	0.0840405	8.91485	4.8849e-19	2.86692e-16
	OASL	707.109	0.757931	0.0903448	8.38932	4.88972e-17	2.72626e-14
	DTX3L	1974.79	0.635288	0.0761254	8.34528	7.10431e-17	3.77239e-14
	RSAD2	195.9	0.871062	0.1053	8.27217	1.31539e-16	6.66726e-14
	DDX58	2241.46	0.682588	0.0827068	8.25311	1.54325e-16	7.4821e-14
	IFI44L	108.219	0.826486	0.102271	8.08136	6.4051e-16	2.97597e-13
	CMPK2	328.65	0.785702	0.102311	7.67955	1.59652e-14	7.12112e-12
	BST2	2230.1	0.567677	0.073971	7.67431	1.66309e-14	7.13276e-12
	DDX60L	429.81	0.758565	0.0992272	7.64473	2.09381e-14	8.64745e-12
	IRF9	1062.65	0.637012	0.0841355	7.57126	3.69632e-14	1.47206e-11
	HERC5	368.732	0.718333	0.101384	7.08527	1.38771e-12	5.33597e-10
	SAMHD1	1882	0.522024	0.0750412	6.95649	3.48848e-12	1.29667e-09
	IFIT5	497.46	0.626031	0.0987418	6.34008	2.29648e-10	8.26065e-08
	HELZ2	1994.57	0.509019	0.0805062	6.32273	2.56979e-10	8.95491e-08
	TRIM22	216.231	0.656134	0.104865	6.25691	3.92673e-10	1.32688e-07
	LAMP3	155.379	0.603119	0.105204	5.73285	9.87594e-09	3.23902e-06
	MSX1	1148.14	-0.459977	0.0845306	-5.44155	5.28195e-08	1.68283e-05
	UBE2S	1820.42	-0.472843	0.0884489	-5.34594	8.99501e-08	2.7109e-05
	IFI27	75.4319	0.521793	0.0975639	5.34822	8.88219e-08	2.7109e-05
	SAMD9L	86.2072	0.512003	0.098972	5.17321	2.30107e-07	6.75242e-05
	CITED4	2779.29	-0.412691	0.082246	-5.01776	5.22766e-07	0.000149471
	SP100	443.636	0.499734	0.100285	4.98314	6.25602e-07	0.000174402
	IRF7	515.504	0.488876	0.0982961	4.9735	6.57538e-07	0.000178834
	JUND	2608.32	-0.398021	0.080991	-4.91439	8.90593e-07	0.000236452
	PLSCR1	3107.45	0.352733	0.0721135	4.89136	1.00142e-06	0.000259694
	TMEM160	257.969	-0.49077	0.105032	-4.67255	2.97477e-06	0.0007539
	ZC3HAV1	3345.1	0.322941	0.0699378	4.61755	3.88298e-06	0.000962203
	TRIM25	4255.03	0.305376	0.068007	4.49036	7.11017e-06	0.0017236
	CLDN1	935.347	0.372917	0.0852068	4.37661	1.20538e-05	0.00285982
	HES4	1637.85	-0.395513	0.090619	-4.36458	1.2737e-05	0.00295896
	TRANK1	117.395	0.448566	0.103139	4.34916	1.36663e-05	0.00311005
	IFITM1	1179.85	0.403494	0.0939745	4.29365	1.75756e-05	0.00391086
	PRR7	538.081	-0.423362	0.0986913	-4.28976	1.78866e-05	0.00391086
	LAP3	1610.61	0.327828	0.0769317	4.26129	2.03253e-05	0.00435861
	TFRC	9169.46	0.30101	0.0711988	4.22775	2.36041e-05	0.00496622
	TAP1	787.13	0.367823	0.088421	4.15991	3.1838e-05	0.006455
	TSPO	2596.51	-0.344956	0.0829187	-4.16018	3.18001e-05	0.006455
	SP110	119.294	0.429806	0.103527	4.15163	3.30117e-05	0.00657346
	ADAR	17484.4	0.25103	0.0609291	4.12003	3.78822e-05	0.00732726
	IQGAP3	3667.91	-0.292983	0.071136	-4.11864	3.81115e-05	0.00732726
	GCSH	182.453	-0.431435	0.105078	-4.10584	4.02844e-05	0.00748685
	MZT2B	1464.84	-0.378956	0.0922627	-4.10736	4.00203e-05	0.00748685
	MFSD3	1048.59	-0.356434	0.0876442	-4.06683	4.76574e-05	0.00871194
	HSH2D	206.571	0.426938	0.105156	4.06006	4.90606e-05	0.00882379
[truncated: 16,104 more rows]

## Sheet: FCIBC02PR->RUX_Vs_Vehicle
Treatment	id	baseMean	log2FoldChange	lfcSE	stat	pvalue	padj
[truncated: 16,003 more rows]

[truncated: 13 more sheets: FCIBC02PR->Combo_Vs_Vehicle, SUM149->Doxo_Vs_Vehicle, SUM149->RUX_Vs_Vehicle, SUM149->Combo_Vs_Vehicle, SUM149DR->Doxo_Vs_Vehicle, SUM149DR->RUX_Vs_Vehicle, SUM149DR->Combo_Vs_Treatment, SUM149->Pacli_Vs_Vehicle, SUM149->RUXo_Vs_Vehicle, SUM149->Combo_Vs_Vehicle (2), SUM149PR->Pacli_Vs_Vehicle, SUM149PR->RUX_Vs_Vehicle, SUM149PR->Combo_Vs_Vehicle]
